# Supplementary material for: Condensation of LINE-1 is critical for retrotransposition
Source: eLife journal article supplement (doi:10.7554/elife.82991), 2023-04-28
Supplement: supp [file elife-82991-supp-v1.zip]

Archive with 29 entries (29 files):
- elife_poa_e82991_Figure_1_figure_supplement_1.pdf
- elife_poa_e82991_Figure_2_figure_supplement_1.pdf
- elife_poa_e82991_Figure_2_figure_supplement_2.pdf
- elife_poa_e82991_Figure_3_figure_supplement_1.pdf
- elife_poa_e82991_Figure_3_figure_supplement_2.pdf
- elife_poa_e82991_Figure_3_figure_supplement_3.pdf
- elife_poa_e82991_Figure_3_figure_supplement_4.pdf
- elife_poa_e82991_Figure_4_figure_supplement_1.pdf
- elife_poa_e82991_Figure_4_figure_supplement_2.pdf
- elife_poa_e82991_Figure_4_figure_supplement_3.pdf
- elife_poa_e82991_Figure_4_figure_supplement_4.pdf
- elife_poa_e82991_Figure_4_figure_supplement_5.pdf
- elife_poa_e82991_Video_1.avi
- elife_poa_e82991_Video_2.avi
- elife_poa_e82991_Video_3.avi
- elife_poa_e82991_Video_4.avi
- elife_poa_e82991_Figure_1_source_data_1.zip
- elife_poa_e82991_Figure_1_source_data_2.zip
- elife_poa_e82991_Figure_1_source_data_3.zip
- elife_poa_e82991_Figure_1_figure_supplement_1_source_data_1.zip
- elife_poa_e82991_Figure_1_figure_supplement_1_source_data_2.zip
- elife_poa_e82991_Figure_2_source_data_1.zip
- elife_poa_e82991_Figure_2_figure_supplement_1_source_data_1.zip
- elife_poa_e82991_Figure_3_source_data_1.zip
- elife_poa_e82991_Figure_3_source_data_2.zip
- elife_poa_e82991_Figure_4_source_data_1.zip
- elife_poa_e82991_Figure_4_source_data_2.zip
- elife_poa_e82991_Figure_4_source_data_3.zip
- elife_poa_e82991_Figure_4_figure_supplement_2_source_data_1.zip
