# Supplementary material for: Condensation of LINE-1 is critical for retrotransposition
Source: eLife journal article supplement (doi:10.7554/elife.82991), 2023-04-28
Supplement: supp [file Figure 1-Supp 1-Source Data 1 README.docx]

Figure 1-Supp 1-Source Data 1

totalPunctaPerCell_maxZfindMaxima_20210520_HeLaSS0016_punctaTimepointsMultiwell_BioRep1_Prom75.xls

- Puncta counting data matrix from the first biological replicate of the doxycycline time course experiment with wild-type ORF1-Halo, with the following sheets:
  - Summary: summarized puncta counts, where each column represents the time of doxycycline induction (0 hours, 3 hours, 6 hours, or 24 hours) and each value represents the total puncta count from a single cellular ROI
  - 0hr: puncta count values from the cells with 0 hours of doxycycline induction, with the following columns
    - FOV: image name
    - Cell: cellular ROI identification number
    - Area: calculated area of the cellular ROI
    - # of Puncta: number of detected puncta in the given cellular ROI
  - 3hr: puncta count values from the cells with 3 hours of doxycycline induction (as above)
  - 6hr: puncta count values from the cells with 6 hours of doxycycline induction (as above)
  - 24hr: puncta count values from the cells with 24 hours of doxycycline induction (as above)

totalPunctaPerCell_maxZfindMaxima_20211017_HeLaORF1_WTdoxPunctaTimecourse_punctaTimepointsMultiwell_BioRep2_Prom75.xls

- Puncta counting data matrix from the second biological replicate of the doxycycline time course experiment with wild-type ORF1-Halo, as above

totalPunctaPerCell_maxZfindMaxima_20211017_HeLaORF1_WTdoxPunctaTimecourse_punctaTimepointsMultiwell_BioRep3_Prom75.xls

- Puncta counting data matrix from the third biological replicate of the doxycycline time course experiment with wild-type ORF1-Halo, as above
