# Supplementary material for: Condensation of LINE-1 is critical for retrotransposition
Source: eLife journal article supplement (doi:10.7554/elife.82991), 2023-04-28
Supplement: supp [file Figure 1-Supp 1-Source Data 2 README.docx]

Figure 1-Supp 1-Source Data 2

6hr_GEMspa_NucCyto_AllPunctaInt.csv

- Tracked ORF1-Halo puncta raw intensity values extracted from GEMspa analysis of data collected after 6 hours of doxycycline induction

24hr_GEMspa_NucCyto_AllPunctaInt.csv

- Tracked ORF1-Halo puncta raw intensity values extracted from GEMspa analysis of data collected after 24 hours of doxycycline induction
