# Supplementary material for: Condensation of LINE-1 is critical for retrotransposition
Source: eLife journal article supplement (doi:10.7554/elife.82991), 2023-04-28
Supplement: supp [file Figure 2-Supp 1-Source Data 1 README.docx]

Figure 2-Supp 1-Source Data 1

Coomassie_20210319.tif

- LICOR scan of a full Coomassie-stained reducing SDS-PAGE gel of protein purification intermediates from the purification of WT ORF1p, K3A/K4A, and R261A

Coomassie_20210319_labeled.png

- A labeled version of the above LICOR scanned gel. TEV: TEV protease, Pre-Ni: Pre-Nickel, GF: Gel Filtration.
