# Supplementary material for: Condensation of LINE-1 is critical for retrotransposition
Source: eLife journal article supplement (doi:10.7554/elife.82991), 2023-04-28
Supplement: supp [file Figure 4-Source Data 2 README.docx]

Figure 4-Source Data 2

HeLaORF1mut_72hrDox_retroT_Biorep1.xlsx

- FACS output data matrix from the first biological replicate of the 72-hour cellular retrotransposition experiment with wild-type ORF1 without doxycycline induction (WT No Dox), ORF1 WT (WT Dox), ORF1 StammerDel (StammerDel Dox), ORF1 StammerAAA (StammerAAA Dox), and ORF1 StammerAEA (StammerAEA Dox), all with the GFP-AI retrotransposition reporter in HeLa M2 cells, each with three technical replicates, with the following columns:
  - Sample: sample name including ORF1 variant, presence or absence of doxycycline, and technical replicate number
  - EGFP-A %Parent: % of EGFP+ cells, based on a threshold set based on the non-induced WT samples
  - AF647-A %Parent: % of Halo+ cells, based on a threshold set based on the non-induced WT samples

HeLaORF1mut_72hrDoxRetroT_Biorep2.xlsx

- FACS output data matrix from the second biological replicate of the 72-hour cellular retrotransposition experiment with wild-type ORF1 +/- doxycycline, ORF1 StammerDel, ORF1 StammerAAA, and ORF1 StammerAEA, as above. The AF647 column is not included because only one biological replicate underwent Halo-JF646 staining prior to FACS.

HeLaORF1mut_72hrDoxRetroT_Biorep3.xlsx

- FACS output data matrix from the third biological replicate of the 72-hour cellular retrotransposition experiment with wild-type ORF1 +/- doxycycline, ORF1 StammerDel, ORF1 StammerAAA, and ORF1 StammerAEA, as above.
