# Supplementary material for: Condensation of LINE-1 is critical for retrotransposition
Source: eLife journal article supplement (doi:10.7554/elife.82991), 2023-04-28
Supplement: supp [file Figure 4-Supp 2-Source Data 1 README.docx]

Figure 4-Supp 2-Source Data 1

Coomassie_20211010.tif

- LICOR scan of a full Coomassie-stained reducing SDS-PAGE gel of protein purification intermediates from the purification of WT ORF1p and ORF1p StammerAAA

Coomassie_20211010_labeled.png

- A labeled version of the above LICOR scanned gel. TEV: TEV protease, GF: Gel Filtration. StammerAAA #1 and #2 refer to two separate cultures of *E coli* expressing ORF1p StammerAAA that were purified in parallel, while StammerAAA pooled refers to samples taken after the protein from the two parallel purifications was combined into a single pool.

Coomassie_20210903.tif

- LICOR scan of a full Coomassie-stained reducing SDS-PAGE gel of protein purification intermediates from the purification of ORF1p StammerAEA and ORF1p StammerAAA

Coomassie_20210903_labeled.png

- A labeled version of the above LICOR scanned gel. TEV: TEV protease, Ni: Nickel, GF: Gel Filtration.
