# Supplementary material for: Condensation of LINE-1 is critical for retrotransposition
Source: eLife journal article supplement (doi:10.7554/elife.82991), 2023-04-28
Supplement: supp [file HeLaORF1mut_72hrDox_retroT_Biorep1.xlsx]

## Sheet: Sheet1
Sample	EGFP-A %Parent	AF647-A %Parent
WT No Dox 1	0.05	0.11
WT No Dox 2	0.04	0.11
WT No Dox 3	0.07	0.09
WT Dox 1	0.74	97.15
WT Dox 2	0.65	97.13
WT Dox 3	0.66	97.15
StammerDel Dox 1	0.16	94.31
StammerDel Dox 2	0.07	94.09
StammerDel Dox 3	0.15	94.19
StammerAAA Dox 1	0.45	96.75
StammerAAA Dox 2	0.48	96.45
StammerAAA Dox 3	0.55	96.17
StammerAEA Dox 1	0.21	93.57
StammerAEA Dox 2	0.18	92.91
StammerAEA Dox 3	0.33	94.01
