# Supplementary material for: Condensation of LINE-1 is critical for retrotransposition
Source: eLife journal article supplement (doi:10.7554/elife.82991), 2023-04-28
Supplement: supp [file HeLaORF1mut_72hrDox_retroT_Biorep1.xlsx]

## Sheet: Sheet1
Sample	EGFP-A %Parent	AF647-A %Parent
WT No Dox 1	0.05	0.11
WT No Dox 2	0.04	0.11
WT No Dox 3	0.07	0.09
WT Dox 1	0.74	97.15
WT Dox 2	0.65	97.13
WT Dox 3	0.66	97.15
K3AK4A Dox 1	0.08	80.42
K3AK4A Dox 2	0.06	79.24
K3AK4A Dox 3	0.15	81.82
R261A Dox 1	0.05	94.69
R261A Dox 2	0.1	93.62
R261A Dox 3	0.11	92.54
