# Supplementary material for: Condensation of LINE-1 is critical for retrotransposition
Source: eLife journal article supplement (doi:10.7554/elife.82991), 2023-04-28
Supplement: supp [file HeLaORF1mut_72hrDoxRetroT_Biorep2.xlsx]

## Sheet: Sheet1
Sample	EGFP-A %Parent
WT No Dox 1	0.01
WT No Dox 2	0.05
WT No Dox 3	0.03
WT Dox 1	1.02
WT Dox 2	1.01
WT Dox 3	1.09
K3AK4A Dox 1	0.05
K3AK4A Dox 2	0.02
K3AK4A Dox 3	0.08
R261A Dox 1	0.05
R261A Dox 2	0.02
R261A Dox 3	0.01
