# Supplementary material for: Condensation of LINE-1 is critical for retrotransposition
Source: eLife journal article supplement (doi:10.7554/elife.82991), 2023-04-28
Supplement: supp [file HeLaORF1mut_72hrDoxRetroT_Biorep3.xlsx]

## Sheet: Sheet1
Sample	EGFP-A %Parent
WT No Dox 1	0.01
WT No Dox 2	0.01
WT No Dox 3	0.01
WT Dox 1	0.78
WT Dox 2	0.92
WT Dox 3	1.01
StammerDel Dox 1	0.02
StammerDel Dox 2	0.02
StammerDel Dox 3	0.02
StammerAAA Dox 1	0.47
StammerAAA Dox 2	0.45
StammerAAA Dox 3	0.41
StammerAEA Dox 1	0.23
StammerAEA Dox 2	0.16
StammerAEA Dox 3	0.16
