# Supplementary material for: Condensation of LINE-1 is critical for retrotransposition
Source: eLife journal article supplement (doi:10.7554/elife.82991), 2023-04-28
Supplement: supp [file K3AK4A_RNA_ORF1dropletFusionAnalysis.xlsx]

## Sheet: K3AK4AprotOnly
#1	Area	Mean Int	StDev Int	Major Axis	Minor Axis	Circ	AR	Time (s)	Thresh = 387
1	3.145	607.457	101	2.673	1.498	0.688	1.785	0	Area > 2um^2
2	3.212	611.861	101.601	2.655	1.54	0.776	1.724	60	Tau:	379.1	s
3	3.128	590.774	85.453	2.59	1.538	0.767	1.685	120	Fusion Length:	1.32671	um
4	3.179	596.651	87.047	2.562	1.58	0.796	1.622	180	Tau/FusLength:	285.745	s/um
5	3.195	603.118	88.345	2.543	1.6	0.83	1.59	240
6	3.271	608.65	91.88	2.518	1.654	0.837	1.522	300
7	3.271	618.712	95.19	2.508	1.661	0.837	1.51	360
8	3.296	621.469	92.839	2.481	1.691	0.825	1.467	420
9	3.364	628.985	97.828	2.471	1.733	0.866	1.426	480
10	3.414	624.135	95.459	2.479	1.754	0.86	1.413	540
11	3.389	640.831	99.047	2.469	1.748	0.841	1.412	600
12	3.422	641.784	100.825	2.447	1.781	0.881	1.374	660
13	3.414	648.446	97.206	2.432	1.787	0.842	1.361	720
14	3.465	653.784	106.548	2.459	1.794	0.873	1.37	780
15	3.591	665.796	113.648	2.515	1.818	0.872	1.384	840
16	3.725	689.33	119.704	2.555	1.856	0.873	1.377	900
#2
1	2.64	623.834	131.734	2.471	1.36	0.589	1.816	0	Thresh = 409
2	2.977	670.605	125.686	2.544	1.49	0.75	1.707	60	Area > 2um^2
3	2.994	691.935	133.82	2.395	1.592	0.808	1.504	120	Tau:	196	s
4	3.044	721.287	137.741	2.258	1.716	0.887	1.316	180	Fusion Length:	1.22921	um
5	3.179	726.881	140.283	2.267	1.785	0.889	1.27	240	Tau/FusLength:	159.452	s/um
6	3.305	736.125	143.129	2.26	1.862	0.906	1.214	300
7	3.448	752.137	142.467	2.281	1.924	0.902	1.185	360
8	3.498	760.822	142.93	2.25	1.979	0.909	1.137	420
9	3.641	770.095	142.624	2.26	2.051	0.932	1.102	480
10	3.725	781.458	146.744	2.261	2.097	0.881	1.078	540
11	3.885	782.113	149.898	2.292	2.158	0.924	1.062	600
12	3.977	788.808	151.293	2.33	2.173	0.913	1.072	660
13	4.045	781.293	144.96	2.324	2.216	0.929	1.049	720
14	4.12	805.331	151.58	2.364	2.219	0.933	1.065	780
15	4.171	805.19	151.879	2.371	2.239	0.912	1.059	840
16	4.28	811.939	154.201	2.417	2.255	0.923	1.072	900
#3
1	3.549	698.464	174.223	2.933	1.54	0.538	1.904	0	Thresh = 437
2	4.137	718.311	160.919	3.096	1.702	0.712	1.819	60	Area > 2um^2
3	4.213	749.794	161.483	2.935	1.828	0.801	1.606	120	Tau:	220.1	s
4	4.238	775.893	169.715	2.799	1.928	0.832	1.451	180	Fusion Length:	1.46466	um
5	4.028	786.929	172.677	2.59	1.98	0.893	1.308	240	Tau/FusLength:	150.274	s/um
6	4.087	803.854	174.83	2.515	2.069	0.894	1.216	300
7	3.986	808.357	177.444	2.421	2.097	0.921	1.155	360
8	4.137	811.685	179.739	2.406	2.19	0.923	1.099	420
9	4.154	825.462	180.17	2.401	2.203	0.94	1.09	480
10	4.322	836.702	182.346	2.433	2.262	0.914	1.076	540
11	4.255	801.051	167.534	2.396	2.261	0.917	1.06	600
12	4.44	832.057	183.613	2.427	2.329	0.938	1.042	660
13	4.516	837.05	183.203	2.442	2.354	0.936	1.037	720
14	4.549	840.384	178.511	2.463	2.352	0.93	1.047	780
15	4.583	838.64	180.557	2.453	2.378	0.902	1.032	840
16	4.743	844.544	185.227	2.502	2.413	0.921	1.037	900
#4
1	2.422	551.347	107.989	2.598	1.187	0.576	2.189	0	Thresh = 366
2	2.497	564.545	97.647	2.46	1.293	0.745	1.903	60	Area > 2um^2
3	2.565	595	104.491	2.322	1.406	0.773	1.651	120	Tau:	186.3	s
4	2.733	599.938	109.5	2.285	1.523	0.864	1.501	180	Fusion Length:	1.29416	um
5	2.783	616.486	109.912	2.258	1.57	0.88	1.438	240	Tau/FusLength:	143.954	s/um
6	2.733	600.458	100.26	2.176	1.599	0.923	1.361	300
7	2.842	632.592	117.802	2.21	1.638	0.877	1.349	360
8	2.893	641.206	121.034	2.206	1.67	0.914	1.321	420
9	2.943	639.946	121.314	2.185	1.715	0.923	1.274	480
10	2.985	642.425	122.242	2.185	1.74	0.921	1.256	540
11	3.036	653.643	119.932	2.196	1.76	0.921	1.248	600
12	3.103	663.55	117.725	2.179	1.813	0.905	1.202	660
13	3.187	676.441	124.193	2.197	1.847	0.908	1.189	720
14	3.254	672.868	123.843	2.18	1.901	0.912	1.147	780
15	3.288	673.903	124.627	2.168	1.931	0.952	1.123	840
16	3.355	681.484	127.801	2.203	1.939	0.885	1.136	900
#5
1	4.364	744.84	205.724	3.552	1.564	0.488	2.271	0	Thresh = 444
2	4.818	762.665	194.28	3.53	1.738	0.686	2.031	60	Area > 2um^2
3	4.978	783.757	197.08	3.385	1.873	0.771	1.807	120	Tau:	217.9	s
4	4.911	809.087	196.393	3.176	1.969	0.802	1.613	180	Fusion Length:	1.7633	um
5	4.575	792.257	186.245	2.904	2.006	0.86	1.448	240	Tau/FusLength:	123.575	s/um
6	4.726	834.786	204.587	2.853	2.109	0.85	1.353	300
7	4.726	849.431	211.544	2.739	2.197	0.905	1.246	360
8	4.776	870.519	215.958	2.694	2.257	0.92	1.194	420
9	4.802	872.972	215.613	2.663	2.296	0.925	1.16	480
10	4.919	895.903	222.201	2.673	2.343	0.901	1.141	540
11	5.062	922.678	235.756	2.686	2.4	0.915	1.119	600
12	5.272	928.732	243.319	2.709	2.478	0.886	1.093	660
13	5.407	935.18	238.379	2.751	2.502	0.892	1.099	720
14	5.466	937.091	234.887	2.755	2.526	0.923	1.091	780
15	5.668	950.555	239.359	2.793	2.584	0.867	1.081	840
16	5.87	964.133	240.126	2.819	2.651	0.892	1.063	900
#6
1	2.304	728.639	79.697	2.679	1.095	0.595	2.446	0	Thresh = 544
2	2.27	729.689	83.71	2.611	1.107	0.647	2.359	60	Area > 1um^2
3	2.237	733.583	80.683	2.527	1.127	0.719	2.242	120	Tau:	703.3	s
4	2.22	729.292	78.108	2.457	1.15	0.726	2.136	180	Fusion Length:	1.317	um
5	2.17	725.271	76.702	2.407	1.148	0.746	2.097	240	Tau/FusLength:	534.018	s/um
6	2.195	723.165	73.107	2.317	1.206	0.768	1.922	300
7	2.136	728.646	73.488	2.273	1.196	0.775	1.9	360
8	2.094	722.807	72.305	2.218	1.202	0.794	1.845	420
9	2.094	729.831	79.265	2.148	1.241	0.809	1.73	480
10	2.027	739.087	79.123	2.088	1.236	0.86	1.689	540
11	1.968	733.936	76.986	2.038	1.229	0.828	1.658	600
12	1.968	725.171	76.514	2.004	1.25	0.835	1.603	660
13	1.959	732.841	83.144	1.973	1.265	0.831	1.56	720
14	1.917	717.724	75.058	1.912	1.277	0.83	1.497	780
15	1.631	692.969	69.547	1.739	1.194	0.856	1.456	840
16	1.446	663.343	55.796	1.637	1.125	0.896	1.456	900
#7	Weird intensity issue on this one -> calculated the threshold on each image
1	8.199	920.28	135.38	4.566	2.286	0.67	1.997	0	Thresh = 574
2	8.308	940.864	136.674	4.506	2.347	0.74	1.92	60	Area > 2um^2
3	8.535	947.771	139.001	4.501	2.414	0.76	1.865	120	Tau:	798.6	s
4	8.611	943.324	134.979	4.449	2.464	0.781	1.806	180	Fusion Length:	2.283	um
5	8.771	939.807	135.331	4.404	2.536	0.791	1.737	240	Tau/FusLength:	349.803	s/um
6	8.914	922.455	126.224	4.386	2.588	0.807	1.695	300
7	8.989	809.22	103.324	4.349	2.632	0.825	1.652	360
8	9.141	655.675	85.648	4.319	2.695	0.835	1.603	420
9	9.216	236.112	22.934	4.283	2.74	0.703	1.563	480
10	9.393	359.219	42.637	4.268	2.802	0.798	1.523	540
11	9.628	454.206	55.453	4.266	2.874	0.861	1.484	600
12	9.637	433.954	53.382	4.223	2.905	0.854	1.453	660
13	9.813	402.462	47.627	4.202	2.974	0.866	1.413	720
14	10.167	971.829	117.344	4.193	3.087	0.852	1.358	780
15	10.394	968.556	121.175	4.184	3.163	0.879	1.323	840
16	10.511	963.784	117.544	4.18	3.202	0.884	1.305	900
#8	Weird intensity issue on this one -> calculated the threshold on each image
1	10.89	977.727	129.892	5.478	2.531	0.576	2.164	0	Thresh = 601
2	11.176	983.001	128.616	5.474	2.599	0.624	2.106	60	Area > 2um^2
3	11.31	991.985	121.66	5.42	2.657	0.649	2.04	120	Tau:	849.6	s
4	11.495	981.307	118.829	5.389	2.716	0.688	1.984	180	Fusion Length:	2.73109	um
5	11.647	958.763	114.37	5.339	2.778	0.715	1.922	240	Tau/FusLength:	311.084	s/um
6	11.689	946.71	113.09	5.265	2.827	0.727	1.863	300
7	11.731	817.71	95.537	5.257	2.841	0.744	1.85	360
8	11.832	668.351	77.534	5.221	2.885	0.758	1.81	420
9	11.941	241.081	21.581	5.193	2.928	0.619	1.774	480
10	11.983	362.245	37.595	5.177	2.947	0.755	1.757	540
11	12.126	456.092	49.524	5.162	2.991	0.772	1.726	600
12	12.176	438.53	48.471	5.116	3.031	0.801	1.688	660
13	12.16	407.083	43.467	5.07	3.054	0.78	1.66	720
14	12.235	1004.49	119.439	4.992	3.121	0.818	1.6	780
15	12.235	1002.74	117.515	4.981	3.127	0.818	1.593	840
16	12.244	1001.09	117.238	4.937	3.157	0.825	1.564	900
#9	Weird intensity issue on this one -> calculated the threshold on each image
1	3.557	829.158	134.131	3.075	1.473	0.69	2.087	0	Thresh = 513
2	3.414	729.936	115.407	2.827	1.538	0.768	1.838	60	Area > 2um^2
3	3.221	576.755	91.301	2.608	1.572	0.785	1.659	120	Tau:	251.3	s
4	3.179	195.937	17.734	2.498	1.62	0.67	1.542	180	Fusion Length:	1.53615	um
5	2.926	299.187	38.953	2.298	1.621	0.797	1.418	240	Tau/FusLength:	163.591	s/um
6	2.952	384.256	54.774	2.219	1.693	0.911	1.31	300
7	2.884	361.286	53.001	2.141	1.715	0.921	1.249	360
8	2.859	332.376	45.721	2.053	1.773	0.919	1.158	420
9	3.162	903.739	145.108	2.144	1.878	0.953	1.142	480
10	3.111	909.097	135.745	2.097	1.889	0.937	1.11	540
11	3.187	891.435	139.921	2.089	1.942	0.944	1.076	600
12	3.221	891.522	137.183	2.071	1.98	0.939	1.046	660
13	3.212	888.026	136.276	2.079	1.967	0.915	1.057	720
14	3.237	872.317	133.87	2.058	2.003	0.944	1.028	780
15	3.254	878.098	134.857	2.067	2.004	0.912	1.032	840
16	3.246	882.541	131.971	2.042	2.024	0.962	1.009	900
#10	Weird intensity issue on this one -> calculated the threshold on each image
1	6.492	788.339	120.657	3.942	2.097	0.722	1.88	0	Thresh = 494
2	6.29	656.251	100.027	3.779	2.119	0.64	1.783	60	Area > 2um^2
3	6.517	229.339	24.065	3.718	2.232	0.565	1.666	120	Tau:	342.4	s
4	6.45	342.726	44.317	3.601	2.281	0.744	1.579	180	Fusion Length:	1.96697	um
5	6.374	444.075	60.708	3.479	2.333	0.758	1.492	240	Tau/FusLength:	174.075	s/um
6	6.374	415.689	56.153	3.442	2.358	0.794	1.46	300
7	6.416	380.858	48.089	3.386	2.412	0.846	1.404	360
8	6.534	973.266	140.148	3.316	2.509	0.893	1.322	420
9	6.567	974.837	136.68	3.301	2.533	0.893	1.303	480
10	6.559	973.058	136.757	3.255	2.566	0.878	1.269	540
11	6.525	975.34	132.906	3.212	2.587	0.898	1.242	600
12	6.618	978.244	136.096	3.229	2.61	0.9	1.237	660
13	6.626	969.164	134.374	3.187	2.647	0.916	1.204	720
14	6.626	975.945	129.968	3.182	2.651	0.916	1.2	780
15	6.677	968.203	132.102	3.174	2.678	0.898	1.185	840
16	6.702	961.068	129.284	3.184	2.68	0.912	1.188	900
#11
1	3.078	471.85	95.911	2.652	1.478	0.579	1.795	0	Thresh = 324
2	3.692	481.542	83.266	2.864	1.641	0.77	1.746	60	Area > 2um^2
3	3.851	504.648	82.59	2.796	1.754	0.835	1.595	120	Tau:	272.5	s
4	4.171	515.181	82.302	2.751	1.93	0.862	1.426	180	Fusion Length:	1.31726	um
5	3.944	516.33	85.753	2.585	1.942	0.875	1.331	240	Tau/FusLength:	206.869	s/um
6	3.944	521.829	87.987	2.512	1.999	0.906	1.256	300
7	4.078	523.882	88.017	2.483	2.092	0.874	1.187	360
8	4.154	528.518	86.983	2.434	2.173	0.908	1.12	420
9	4.179	536.408	89.213	2.401	2.216	0.909	1.083	480
10	4.331	534.515	85.559	2.431	2.268	0.91	1.072	540
11	4.499	534.544	88.871	2.461	2.328	0.907	1.057	600
12	4.558	541.421	87.853	2.453	2.366	0.932	1.037	660
13	4.625	543.855	91.012	2.472	2.382	0.927	1.038	720
14	4.633	544.276	88.42	2.456	2.402	0.892	1.023	780
15	4.743	541.871	87.202	2.487	2.428	0.913	1.024	840
16	4.827	543.941	93.261	2.49	2.468	0.925	1.009	900
#12
1	6.828	933.001	147.991	4.339	2.004	0.531	2.165	0	Thresh = 568
2	6.652	946.879	147.08	4.083	2.074	0.682	1.969	60	Area > 2um^2
3	6.559	964.878	146.732	3.925	2.128	0.759	1.844	120	Tau:	320.7	s
4	6.601	962.969	151.16	3.773	2.228	0.795	1.694	180	Fusion Length:	2.16318	um
5	6.509	968.575	146.774	3.668	2.259	0.821	1.624	240	Tau/FusLength:	148.254	s/um
6	6.475	966.843	149.78	3.558	2.317	0.839	1.536	300
7	6.349	970.887	145.235	3.477	2.325	0.841	1.496	360
8	6.34	968.394	142.465	3.402	2.373	0.867	1.433	420
9	6.324	962.346	148.396	3.316	2.428	0.884	1.366	480
10	6.231	962.206	139.357	3.24	2.449	0.91	1.323	540
11	6.231	963.686	144.124	3.195	2.483	0.895	1.287	600
12	6.206	959.809	141.256	3.172	2.491	0.892	1.273	660
13	6.206	953.822	137.224	3.152	2.507	0.892	1.258	720
14	6.164	959.621	132.462	3.099	2.533	0.896	1.223	780
15	6.139	954.211	132.598	3.094	2.526	0.907	1.225	840
16	6.206	949.236	137.685	3.077	2.568	0.906	1.198	900
#13
1	6.929	702.308	101.752	3.903	2.26	0.731	1.727	0	Thresh = 453
2	7.148	719.362	107.336	3.818	2.384	0.792	1.602	60	Area > 2um^2
3	7.291	740.042	109.216	3.726	2.491	0.828	1.495	120	Tau:	265.3	s
4	7.291	743.976	106.072	3.612	2.57	0.87	1.405	180	Fusion Length:	1.92696	um
5	7.375	738.509	108.4	3.551	2.644	0.894	1.343	240	Tau/FusLength:	137.678	s/um
6	7.392	745.95	106.624	3.478	2.706	0.869	1.285	300
7	7.501	748.234	107.539	3.454	2.765	0.899	1.249	360
8	7.526	756.027	104.399	3.384	2.832	0.916	1.195	420
9	7.543	757.05	103.942	3.355	2.863	0.882	1.172	480
10	7.518	715.631	90.316	3.345	2.862	0.919	1.169	540
11	7.694	755.936	98.744	3.341	2.932	0.917	1.14	600
12	7.795	756.015	102.059	3.345	2.968	0.915	1.127	660
13	7.804	755.552	95.106	3.343	2.973	0.916	1.124	720
14	7.896	755.236	96.578	3.332	3.017	0.904	1.104	780
15	8.005	748.039	95.039	3.351	3.042	0.93	1.102	840
16	8.014	753.918	92.639	3.345	3.05	0.922	1.097	900
#14
1	4.289	896.547	146.737	3.18	1.717	0.704	1.852	0	Thresh = 559
2	4.347	901.967	146.245	2.967	1.866	0.801	1.59	60	Area > 2um^2
3	4.381	920.476	145.557	2.842	1.963	0.849	1.448	120	Tau:	177.6	s
4	4.331	921.891	152.363	2.71	2.035	0.89	1.332	180	Fusion Length:	1.58492	um
5	4.272	927.827	152.212	2.593	2.098	0.878	1.236	240	Tau/FusLength:	112.056	s/um
6	4.28	928.499	150.7	2.556	2.132	0.928	1.198	300
7	4.305	927.24	150.255	2.492	2.199	0.91	1.133	360
8	4.322	927.251	148.749	2.456	2.241	0.932	1.096	420
9	4.331	933.497	154.942	2.463	2.238	0.939	1.101	480
10	4.356	925.214	148.65	2.448	2.266	0.921	1.081	540
11	4.356	923.654	141.689	2.437	2.275	0.939	1.071	600
12	4.364	919.566	144.519	2.417	2.299	0.941	1.051	660
13	4.398	916.268	143.925	2.429	2.305	0.935	1.054	720
14	4.432	921.398	146.377	2.418	2.333	0.906	1.036	780
15	4.415	916.446	138.607	2.404	2.338	0.903	1.028	840
16	4.423	909.688	136.888	2.413	2.334	0.917	1.034	900
#15
1	5.811	701.068	101.53	3.605	2.052	0.694	1.757	0	Thresh = 450
2	6.021	725.753	103.934	3.557	2.155	0.801	1.65	60	Area > 2um^2
3	5.97	733.725	103.59	3.407	2.231	0.838	1.527	120	Tau:	276.8	s
4	5.937	739.01	104.307	3.3	2.291	0.839	1.441	180	Fusion Length:	1.78515	um
5	5.836	741.895	101.809	3.148	2.36	0.891	1.334	240	Tau/FusLength:	155.057	s/um
6	5.794	742.849	104.809	3.051	2.418	0.891	1.262	300
7	5.769	745.241	100.915	2.97	2.473	0.913	1.201	360
8	5.71	745.583	101.101	2.913	2.496	0.915	1.167	420
9	5.752	747.402	100.977	2.861	2.559	0.922	1.118	480
10	5.827	744.838	104.694	2.857	2.597	0.912	1.1	540
11	5.844	739.971	98.019	2.811	2.647	0.895	1.062	600
12	5.861	736.798	97.299	2.821	2.645	0.928	1.067	660
13	5.979	735.184	99.066	2.84	2.68	0.909	1.06	720
14	6.004	738.769	101.755	2.833	2.698	0.898	1.05	780
15	6.004	734.008	96.522	2.834	2.698	0.928	1.05	840
16	6.063	733.782	95.336	2.856	2.703	0.906	1.057	900

## Sheet: K3AK4A1to10000RNA
#1	Area	Mean Int	StDev Int	Major Axis	Minor Axis	Circ	AR	Time (s)	Thresh = 303
1	3.893	446.03	78.222	3.287	1.508	0.579	2.179	0	Area > 1um^2
2	4.062	468.72	75.798	3.092	1.673	0.797	1.848	60	Tau:	161.9	s
3	4.162	468.584	74.821	2.92	1.815	0.839	1.609	120	Fusion Length:	1.6379	um
4	4.095	468.979	78.704	2.752	1.895	0.817	1.452	180	Tau/FusLength:	98.8458	s/um
5	4.087	478.858	77.697	2.69	1.934	0.881	1.391	240
6	4.238	475.899	76.125	2.659	2.03	0.883	1.31	300
7	4.255	477.613	76.84	2.625	2.064	0.87	1.272	360
8	4.272	478.407	75.132	2.58	2.108	0.908	1.224	420
9	4.255	482.872	74.504	2.542	2.131	0.899	1.193	480
10	4.364	487.52	75.174	2.524	2.201	0.922	1.147	540
11	4.398	491.229	74.406	2.529	2.214	0.904	1.142	600
12	4.499	489.08	76.094	2.558	2.239	0.89	1.142	660
13	4.415	473.347	65.684	2.534	2.218	0.903	1.142	720
14	4.44	469.432	62.698	2.571	2.198	0.926	1.17	780
15	4.499	472.15	60.334	2.558	2.239	0.925	1.143	840
16	4.667	468.387	60.018	2.583	2.3	0.928	1.123	900
#2
1	4.095	509.789	133.951	3.052	1.709	0.543	1.786	0	Thresh = 314
2	4.104	520.49	127.914	2.766	1.889	0.712	1.464	60	Area > 2um^2
3	4.154	529.514	126.421	2.574	2.055	0.753	1.252	120	Tau:	80.71	s
4	4.062	539.062	131.444	2.411	2.145	0.878	1.124	180	Fusion Length:	1.51499	um
5	3.961	544.556	130.027	2.267	2.225	0.904	1.019	240	Tau/FusLength:	53.2744	s/um
6	3.969	549.712	132.614	2.29	2.207	0.846	1.038	300
7	3.927	546.55	125.786	2.291	2.182	0.854	1.05	360
8	3.927	551.394	128.551	2.295	2.179	0.878	1.053	420
9	3.885	550.511	124.348	2.275	2.174	0.869	1.047	480
10	3.952	555.134	126.531	2.295	2.192	0.902	1.047	540
11	3.759	521.096	111.654	2.274	2.105	0.889	1.08	600
12	3.902	526.78	115.708	2.338	2.125	0.891	1.1	660
13	3.977	528.285	117.038	2.347	2.158	0.895	1.088	720
14	4.045	525.316	114.776	2.369	2.174	0.874	1.09	780
15	4.12	522.616	115.088	2.395	2.191	0.878	1.093	840
16	4.196	517.894	112.304	2.439	2.19	0.925	1.114	900
#3
1	2.413	503.913	83.019	2.616	1.175	0.708	2.227	0	Thresh = 348
2	2.556	526.125	84.174	2.426	1.342	0.808	1.808	60	Area > 2um^2
3	2.531	523.754	83.078	2.279	1.414	0.808	1.611	120	Tau:	113.6	s
4	2.464	522.771	81.814	2.161	1.452	0.878	1.488	180	Fusion Length:	1.30122	um
5	2.464	521.024	81.459	2.11	1.487	0.901	1.419	240	Tau/FusLength:	87.3026	s/um
6	2.455	518.418	81.814	2.055	1.521	0.875	1.351	300
7	2.413	512.551	76.547	2.016	1.524	0.915	1.322	360
8	2.38	516.092	76.288	1.97	1.538	0.927	1.281	420
9	2.355	506.489	74.376	1.97	1.522	0.826	1.295	480
10	2.329	509.993	76.217	1.944	1.526	0.877	1.274	540
11	2.321	505.801	71.236	1.922	1.537	0.921	1.25	600
12	2.304	508.113	72.3	1.942	1.511	0.89	1.286	660
13	2.304	510.044	73.295	1.964	1.493	0.907	1.315	720
14	2.321	506.681	71.534	1.952	1.514	0.897	1.29	780
15	2.355	504.911	70.801	1.99	1.507	0.886	1.32	840
16	2.397	503.779	74.198	1.965	1.553	0.926	1.266	900
#4
1	2.867	557.783	111.307	2.467	1.48	0.662	1.668	0	Thresh = 379
2	3.439	662.467	140.281	2.326	1.883	0.874	1.236	60	Area > 2um^2
3	3.582	671.519	138.063	2.282	1.999	0.931	1.141	120	Tau:	60.03	s
4	3.708	666.73	140.181	2.253	2.096	0.934	1.075	180	Fusion Length:	1.20862	um
5	3.725	667.995	136.401	2.243	2.115	0.886	1.061	240	Tau/FusLength:	49.6683	s/um
6	3.7	674.652	127.093	2.191	2.151	0.947	1.019	300
7	3.792	661.035	128.304	2.23	2.165	0.889	1.03	360
8	3.767	655.699	122.887	2.221	2.159	0.915	1.029	420
9	3.809	653.038	119.998	2.232	2.173	0.893	1.027	480
10	3.86	648.17	117.082	2.231	2.203	0.938	1.012	540
11	3.868	641.967	116.162	2.258	2.182	0.94	1.035	600
12	3.86	644.854	114.401	2.249	2.185	0.863	1.029	660
13	3.851	638.507	109.617	2.233	2.196	0.922	1.017	720
14	3.902	636.276	111.049	2.269	2.19	0.934	1.036	780
15	3.818	635.262	109.39	2.24	2.17	0.859	1.032	840
16	3.86	636.795	110.861	2.251	2.184	0.905	1.031	900
#5
1	8.157	626.879	88.396	4.902	2.119	0.58	2.313	0	Thresh = 405
2	8.476	638.691	85.209	4.759	2.268	0.693	2.098	60	Area > 2um^2
3	8.846	649.625	87.565	4.662	2.416	0.749	1.93	120	Tau:	299.6	s
4	9.006	653.016	84.878	4.544	2.524	0.793	1.801	180	Fusion Length:	2.42841	um
5	9.057	656.792	85.33	4.445	2.594	0.808	1.714	240	Tau/FusLength:	123.373	s/um
6	9.183	658.44	86.781	4.383	2.668	0.816	1.643	300
7	9.124	658.747	80.99	4.312	2.694	0.832	1.601	360
8	9.342	662.658	87.448	4.245	2.802	0.794	1.515	420
9	9.359	664.24	85.799	4.208	2.832	0.816	1.486	480
10	9.469	662.777	85.678	4.174	2.888	0.839	1.445	540
11	9.57	668.823	86.425	4.121	2.957	0.848	1.394	600
12	9.57	664.69	81.784	4.089	2.98	0.845	1.372	660
13	9.553	661.132	79.282	4.049	3.004	0.87	1.348	720
14	9.578	660.361	80.698	4.024	3.031	0.875	1.328	780
15	9.603	659.591	80.26	4.019	3.042	0.87	1.321	840
16	9.62	666.25	83.062	3.987	3.072	0.86	1.298	900
#6
1	4.39	646.594	125.839	3.325	1.681	0.511	1.979	0	Thresh = 359
2	4.633	652.982	120.469	3.379	1.746	0.604	1.935	60	Area > 2um^2
3	4.701	644.993	112.937	3.397	1.762	0.65	1.928	120	Tau:	369.7	s
4	4.776	650.632	111.187	3.34	1.821	0.73	1.834	180	Fusion Length:	1.6624	um
5	4.76	657.574	108.719	3.281	1.847	0.798	1.777	240	Tau/FusLength:	222.39	s/um
6	4.835	653.176	115.716	3.249	1.895	0.802	1.714	300
7	4.76	625.2	96.579	3.167	1.914	0.818	1.655	360
8	4.785	616.446	95.275	3.174	1.919	0.818	1.654	420
9	4.751	612.055	92.836	3.132	1.931	0.827	1.622	480
10	4.785	613.005	97.175	3.129	1.947	0.843	1.607	540
11	4.768	609.319	92.999	3.118	1.947	0.84	1.602	600
12	4.793	605.168	94.253	3.104	1.966	0.845	1.579	660
13	4.768	611.222	91.687	3.088	1.966	0.825	1.571	720
14	4.776	594.273	89.023	3.087	1.97	0.842	1.567	780
15	4.726	605.034	89.845	3.074	1.957	0.837	1.571	840
16	4.768	595.48	87.743	3.062	1.983	0.856	1.544	900
#7
1	6.559	573.56	78.812	4.173	2.001	0.518	2.085	0	Thresh = 383
2	6.702	584.753	79.322	4.107	2.078	0.659	1.977	60	Area > 2um^2
3	6.837	594.203	79.381	4.016	2.167	0.761	1.853	120	Tau:	282.5	s
4	6.904	606.615	81.401	3.931	2.236	0.776	1.758	180	Fusion Length:	2.08475	um
5	7.022	608.247	84.45	3.861	2.316	0.801	1.667	240	Tau/FusLength:	135.508	s/um
6	7.013	609.685	80.266	3.778	2.364	0.808	1.598	300
7	7.08	614.822	83.501	3.754	2.402	0.833	1.563	360
8	7.181	616.734	82.11	3.727	2.453	0.84	1.519	420
9	7.249	614.002	80.419	3.693	2.499	0.856	1.478	480
10	7.198	625.143	79.247	3.658	2.505	0.85	1.46	540
11	7.316	614.733	78.823	3.663	2.543	0.847	1.44	600
12	7.282	617.731	75.718	3.645	2.544	0.873	1.433	660
13	7.299	617.243	78.83	3.642	2.551	0.862	1.428	720
14	7.358	612.56	78.101	3.629	2.582	0.869	1.406	780
15	7.358	618.047	76.496	3.603	2.6	0.882	1.386	840
16	7.408	619.005	78.263	3.607	2.615	0.866	1.38	900
#8
1	7.282	462.703	57.367	4.453	2.082	0.569	2.138	0	Thresh = 314
2	7.627	464.41	53.665	4.343	2.236	0.703	1.942	60	Area > 2um^2
3	7.854	469.887	54.094	4.231	2.364	0.771	1.79	120	Tau:	272.8	s
4	8.047	470.648	51.818	4.149	2.47	0.797	1.68	180	Fusion Length:	2.22181	um
5	8.199	470.963	51.674	4.05	2.578	0.828	1.571	240	Tau/FusLength:	122.783	s/um
6	8.224	465.524	48.735	3.983	2.629	0.831	1.515	300
7	8.35	463.671	50.726	3.907	2.721	0.872	1.436	360
8	8.35	461.117	46.872	3.865	2.75	0.884	1.405	420
9	8.443	467.244	50.359	3.804	2.826	0.89	1.346	480
10	8.56	464.041	49.879	3.797	2.87	0.865	1.323	540
11	8.535	462.37	49.709	3.76	2.89	0.891	1.301	600
12	8.518	461.807	47.326	3.733	2.905	0.898	1.285	660
13	8.577	459.936	46.828	3.72	2.936	0.863	1.267	720
14	8.577	457.311	45.812	3.695	2.955	0.84	1.25	780
15	8.636	458.129	45.958	3.678	2.989	0.893	1.23	840
16	8.737	458.687	47.193	3.667	3.033	0.879	1.209	900
#9
1	4.423	470.888	77.93	3.508	1.605	0.615	2.186	0	Thresh = 321
2	4.591	483.027	71.391	3.32	1.761	0.752	1.885	60	Area > 2um^2
3	4.692	490.629	72.363	3.215	1.858	0.769	1.73	120	Tau:	190.9	s
4	4.701	492.633	71.119	3.081	1.943	0.808	1.586	180	Fusion Length:	1.74766	um
5	4.659	488.379	70.023	2.992	1.982	0.847	1.51	240	Tau/FusLength:	109.232	s/um
6	4.65	495.523	74.56	2.933	2.019	0.845	1.453	300
7	4.617	492.787	69.231	2.865	2.051	0.866	1.397	360
8	4.608	493.23	68.689	2.831	2.073	0.864	1.366	420
9	4.659	491.951	70.541	2.796	2.121	0.902	1.318	480
10	4.591	494.172	69.147	2.779	2.103	0.873	1.322	540
11	4.6	491.514	68.878	2.744	2.135	0.903	1.285	600
12	4.575	491.259	65.665	2.704	2.154	0.92	1.255	660
13	4.583	491.831	67.609	2.715	2.149	0.9	1.263	720
14	4.608	489.745	66.417	2.721	2.156	0.876	1.262	780
15	4.642	487.688	68.457	2.73	2.165	0.899	1.261	840
16	4.583	489.139	66.207	2.679	2.178	0.905	1.23	900
#10
1	7.417	566.57	95.804	4.589	2.058	0.504	2.23	0	Thresh = 337
2	7.753	567.956	96.668	4.661	2.118	0.556	2.201	60	Area > 2um^2
3	7.829	568.639	88.009	4.66	2.139	0.609	2.179	120	Tau:	710.4	s
4	7.972	588.545	87.873	4.605	2.204	0.686	2.089	180	Fusion Length:	2.28228	um
5	8.031	584.047	84.486	4.554	2.245	0.738	2.028	240	Tau/FusLength:	311.268	s/um
6	8.115	583.373	83.625	4.473	2.31	0.777	1.936	300
7	8.174	576.213	81.393	4.43	2.349	0.765	1.885	360
8	8.157	579.613	80.179	4.342	2.392	0.791	1.815	420
9	8.098	579.002	77.361	4.284	2.407	0.804	1.78	480
10	8.157	574.852	79.237	4.262	2.437	0.802	1.749	540
11	8.14	566.723	78.01	4.212	2.461	0.797	1.712	600
12	8.148	572.628	74.504	4.182	2.481	0.82	1.685	660
13	8.148	573.053	76.989	4.149	2.501	0.839	1.659	720
14	8.132	568.513	75.708	4.116	2.515	0.829	1.637	780
15	8.207	572.667	79.798	4.101	2.548	0.807	1.609	840
16	8.174	567.254	75.365	4.079	2.551	0.842	1.599	900
#11
1	1.547	512.125	96.021	2	0.985	0.709	2.03	0	Thresh = 342
2	1.488	522.243	88.432	1.761	1.076	0.832	1.636	60	Area > 1um^2
3	1.396	521.741	87.965	1.602	1.11	0.873	1.444	120	Tau:	133	s
4	1.379	527.701	88.736	1.528	1.149	0.938	1.33	180	Fusion Length:	0.999887	um
5	1.337	525.95	89.411	1.444	1.179	0.943	1.224	240	Tau/FusLength:	133.015	s/um
6	1.312	527.224	95.318	1.409	1.185	0.949	1.189	300
7	1.329	530.608	99.899	1.358	1.245	0.961	1.091	360
8	1.337	532.428	96.163	1.338	1.272	0.943	1.052	420
9	1.261	529.72	93.182	1.32	1.217	0.972	1.085	480
10	1.228	529.479	92.117	1.302	1.2	0.961	1.085	540
11	1.27	520.093	91.226	1.32	1.224	0.942	1.078	600
12	1.253	523.302	90.582	1.269	1.257	0.981	1.01	660
13	1.253	520.309	90.012	1.3	1.227	0.897	1.059	720
14	1.287	517.869	82.729	1.302	1.259	0.931	1.034	780
15	1.261	520.353	86.146	1.324	1.213	0.936	1.092	840
16	1.312	511.327	88.099	1.348	1.239	0.974	1.088	900

## Sheet: K3AK4A1to3000RNA
#1	Area	Mean Int	StDev Int	Major Axis	Minor Axis	Circ	AR	Time (s)	Thresh = 454
1	3.641	728.711	139.7	3.22	1.44	0.635	2.236	0	Area > 2um^2
2	3.683	767.562	149.074	2.903	1.616	0.788	1.797	60	Tau:	138.8	s
3	3.607	777.457	153.173	2.689	1.708	0.864	1.574	120	Fusion Length:	1.601	um
4	3.599	777.869	150.391	2.572	1.782	0.869	1.444	180	Tau/FusLength:	86.6958	s/um
5	3.532	778.874	152.118	2.452	1.834	0.904	1.337	240
6	3.481	778.681	150.68	2.342	1.892	0.939	1.238	300
7	3.54	779.691	156.004	2.312	1.949	0.92	1.186	360
8	3.49	772.559	150.862	2.292	1.938	0.907	1.183	420
9	3.473	775.431	154.179	2.261	1.956	0.916	1.156	480
10	3.473	782.407	155.128	2.248	1.967	0.916	1.142	540
11	3.397	780.525	147.188	2.224	1.945	0.917	1.144	600
12	3.481	785.696	150.684	2.22	1.996	0.933	1.112	660
13	3.54	787.675	149.645	2.246	2.007	0.92	1.119	720
14	3.49	789.66	148.199	2.245	1.98	0.941	1.134	780
15	3.523	781.506	149.53	2.223	2.018	0.896	1.102	840
16	3.54	784.05	148.236	2.252	2.002	0.914	1.125	900
#2
1	3.969	508.792	91.63	3.398	1.487	0.499	2.285	0	Thresh = 347
2	4.162	516.313	87.641	3.338	1.588	0.696	2.103	60	Area > 2um^2
3	4.289	528.471	89.255	3.194	1.71	0.735	1.868	120	Tau:	222.1	s
4	4.247	531.428	88.068	3.024	1.788	0.788	1.691	180	Fusion Length:	1.68572	um
5	4.23	534.143	84.897	2.921	1.844	0.853	1.584	240	Tau/FusLength:	131.754	s/um
6	4.272	533.319	83.761	2.838	1.917	0.829	1.48	300
7	4.255	531.472	79.763	2.779	1.95	0.853	1.425	360
8	4.247	529.622	79.762	2.735	1.977	0.88	1.383	420
9	4.179	531.034	76.161	2.682	1.984	0.883	1.352	480
10	4.23	530.064	80.177	2.657	2.027	0.832	1.311	540
11	4.188	524.908	79.744	2.614	2.04	0.88	1.281	600
12	4.12	528.963	77.636	2.584	2.031	0.854	1.272	660
13	4.162	526.737	77.928	2.597	2.041	0.88	1.272	720
14	4.196	519.856	80.83	2.594	2.06	0.882	1.259	780
15	4.162	520.113	77.619	2.549	2.079	0.91	1.226	840
16	4.213	520.894	78.523	2.582	2.078	0.885	1.243	900
#3
1	3.01	542.304	84.179	2.943	1.302	0.563	2.26	0	Thresh = 410
2	3.069	553.781	83.622	2.67	1.463	0.762	1.825	60	Area > 2um^2
3	2.809	562.036	92.081	2.343	1.526	0.813	1.535	120	Tau:	123.5	s
4	2.75	568.18	92.186	2.125	1.647	0.869	1.29	180	Fusion Length:	1.46171	um
5	2.59	578.305	95.745	1.952	1.689	0.906	1.155	240	Tau/FusLength:	84.4904	s/um
6	2.708	575.177	95.02	1.99	1.733	0.908	1.148	300
7	2.783	572.411	88.066	1.966	1.803	0.888	1.09	360
8	2.783	572.227	91.025	1.961	1.807	0.853	1.085	420
9	2.725	573.694	89.435	1.915	1.812	0.907	1.057	480
10	2.8	569.697	91.697	1.961	1.819	0.932	1.078	540
11	2.901	570.177	91.971	1.969	1.876	0.874	1.049	600
12	2.96	580.494	99.674	1.98	1.904	0.871	1.04	660
13	3.01	579.332	93.897	1.97	1.945	0.872	1.013	720
14	3.036	581.028	94.176	1.982	1.95	0.873	1.016	780
15	3.044	584.251	94.484	2.007	1.931	0.896	1.04	840
16	3.12	582.542	96.035	2.025	1.962	0.889	1.032	900
#4
1	2.708	644.438	170.293	2.647	1.303	0.464	2.032	0	Thresh = 409
2	3.078	657.552	162.761	2.689	1.457	0.692	1.845	60	Area > 2um^2
3	3.01	678.497	157.121	2.545	1.506	0.817	1.69	120	Tau:	237	s
4	3.019	689.393	162.556	2.411	1.594	0.854	1.513	180	Fusion Length:	1.32334	um
5	2.943	700.609	160.348	2.261	1.658	0.902	1.364	240	Tau/FusLength:	179.092	s/um
6	3.002	704.134	163.381	2.214	1.726	0.926	1.283	300
7	2.952	700.92	166.941	2.147	1.75	0.926	1.227	360
8	2.968	715.722	171.212	2.104	1.797	0.971	1.171	420
9	2.952	720.667	167.219	2.064	1.821	0.904	1.134	480
10	2.994	724.643	167.12	2.065	1.846	0.902	1.119	540
11	3.002	724.406	166.742	2.048	1.867	0.92	1.097	600
12	3.002	720.683	162.035	2.016	1.896	0.926	1.064	660
13	3.103	721.664	167.098	2.043	1.933	0.913	1.057	720
14	3.103	725.005	165.106	2.041	1.935	0.92	1.055	780
15	2.968	664.263	128.373	1.983	1.906	0.909	1.04	840
16	3.128	725.774	162.523	2.035	1.957	0.906	1.04	900
#5
1	4.566	671.409	113.808	3.808	1.527	0.523	2.495	0	Thresh = 436
2	4.743	671.661	109.769	3.681	1.64	0.681	2.244	60	Area > 2um^2
3	4.44	625.705	85.883	3.494	1.618	0.665	2.159	120	Tau:	310.5	s
4	4.726	683.945	110.376	3.395	1.772	0.732	1.916	180	Fusion Length:	1.8663	um
5	4.701	682.406	105.066	3.303	1.812	0.809	1.822	240	Tau/FusLength:	166.372	s/um
6	4.684	692.718	110.49	3.25	1.835	0.783	1.771	300
7	4.642	696.299	111.8	3.158	1.872	0.82	1.687	360
8	4.28	623.595	87.422	3.016	1.807	0.835	1.67	420
9	4.566	693.794	113.506	3.028	1.92	0.821	1.577	480
10	4.566	689.28	109.856	2.974	1.955	0.875	1.521	540
11	4.507	687.366	106.345	2.921	1.965	0.885	1.487	600
12	4.44	687.527	108.159	2.878	1.964	0.867	1.465	660
13	4.39	677.747	107.531	2.842	1.967	0.873	1.445	720
14	4.364	680.775	104.833	2.794	1.989	0.88	1.405	780
15	4.347	677.313	101.061	2.775	1.994	0.877	1.392	840
16	4.364	681.046	105.92	2.763	2.011	0.892	1.374	900
#6
1	6.181	444.031	83.624	4.298	1.831	0.424	2.347	0	Thresh = 293
2	6.425	448.364	82.481	4.26	1.92	0.609	2.219	60	Area > 2um^2
3	6.542	452.422	78.811	4.17	1.998	0.704	2.087	120	Tau:	435.3	s
4	6.576	457.35	76.256	4.063	2.061	0.741	1.971	180	Fusion Length:	2.12534	um
5	6.576	459.428	74.543	4.007	2.09	0.774	1.917	240	Tau/FusLength:	204.814	s/um
6	6.61	462.905	74.762	3.947	2.132	0.782	1.852	300
7	6.652	467.097	75.806	3.88	2.183	0.796	1.777	360
8	6.626	464.245	72.744	3.822	2.208	0.829	1.731	420
9	6.559	469.887	75.955	3.735	2.236	0.817	1.67	480
10	6.559	469.162	73.714	3.672	2.274	0.796	1.615	540
11	6.551	465.714	74.155	3.641	2.291	0.807	1.59	600
12	6.492	465.132	69.623	3.592	2.301	0.821	1.561	660
13	6.517	464.653	71.877	3.554	2.335	0.85	1.522	720
14	6.492	465.264	73.324	3.528	2.343	0.796	1.506	780
15	6.425	465.474	69.685	3.485	2.347	0.843	1.485	840
16	6.492	467.113	72.806	3.461	2.388	0.843	1.45	900
#7
1	3.347	537.807	94.37	3.148	1.354	0.544	2.325	0	Thresh = 386
2	3.523	559.862	91.354	3.043	1.474	0.707	2.064	60	Area > 2um^2
3	3.473	570.678	92.855	2.844	1.555	0.766	1.829	120	Tau:	265.8	s
4	3.313	567.178	94.201	2.668	1.581	0.731	1.687	180	Fusion Length:	1.55855	um
5	3.355	582.531	95.368	2.589	1.65	0.845	1.57	240	Tau/FusLength:	170.543	s/um
6	3.389	587.481	98.446	2.529	1.706	0.796	1.482	300
7	3.305	592.539	98.971	2.451	1.717	0.878	1.427	360
8	3.355	588.195	101.688	2.373	1.801	0.92	1.318	420
9	3.33	592.962	98.594	2.293	1.849	0.913	1.24	480
10	3.313	596.299	103.763	2.279	1.851	0.929	1.231	540
11	3.263	596.446	94.791	2.229	1.864	0.915	1.196	600
12	3.33	604.035	97.063	2.236	1.896	0.919	1.18	660
13	3.296	595.982	93.528	2.204	1.905	0.918	1.157	720
14	3.364	597.212	97.229	2.192	1.954	0.928	1.122	780
15	3.355	594.434	94.677	2.198	1.943	0.905	1.131	840
16	3.38	589.092	92.528	2.157	1.995	0.898	1.081	900
#8
1	6.45	660.15	105.914	4.007	2.049	0.539	1.955	0	Thresh = 455
2	6.811	665.979	101.235	3.96	2.19	0.688	1.808	60	Area > 2um^2
3	6.929	668.973	91.91	3.903	2.261	0.741	1.727	120	Tau:	272.7	s
4	7.139	677.084	99.297	3.881	2.342	0.76	1.657	180	Fusion Length:	2.00298	um
5	7.156	677.8	97.019	3.781	2.41	0.773	1.569	240	Tau/FusLength:	136.147	s/um
6	7.232	678.442	95.799	3.768	2.443	0.789	1.542	300
7	7.165	681.112	94.495	3.741	2.438	0.797	1.534	360
8	7.19	679.441	91.569	3.707	2.469	0.773	1.501	420
9	7.198	681.94	89.559	3.669	2.498	0.813	1.469	480
10	7.35	676.221	92.228	3.641	2.57	0.838	1.417	540
11	7.324	679.835	91.577	3.643	2.56	0.818	1.423	600
12	6.719	605.474	62.595	3.525	2.427	0.814	1.453	660
13	7.307	675.929	87.708	3.585	2.596	0.825	1.381	720
14	7.299	677.43	91.474	3.578	2.598	0.797	1.377	780
15	6.887	624.294	66.951	3.491	2.512	0.851	1.39	840
16	7.24	670.664	85.838	3.528	2.613	0.847	1.35	900
#9
1	3.086	439.793	76.548	3.108	1.264	0.492	2.458	0	Thresh = 304
2	3.263	446.495	69.476	2.973	1.397	0.713	2.128	60	Area > 2um^2
3	3.263	455.606	68.454	2.864	1.451	0.754	1.974	120	Tau:	243.6	s
4	3.263	462.985	72.16	2.728	1.523	0.776	1.791	180	Fusion Length:	1.5267	um
5	3.263	461.296	70.849	2.645	1.571	0.835	1.684	240	Tau/FusLength:	159.56	s/um
6	3.237	466.753	68.941	2.589	1.592	0.865	1.626	300
7	3.195	463.408	69.644	2.515	1.618	0.854	1.554	360
8	3.187	462.124	71.042	2.49	1.63	0.865	1.527	420
9	3.153	461.576	71.681	2.438	1.647	0.809	1.481	480
10	3.145	460.051	69.413	2.374	1.687	0.862	1.407	540
11	3.086	460.444	70.409	2.32	1.694	0.859	1.37	600
12	3.086	458.815	69.383	2.3	1.709	0.9	1.346	660
13	3.103	463.715	70.574	2.297	1.72	0.87	1.335	720
14	2.775	415.615	48.913	2.182	1.619	0.85	1.348	780
15	3.036	462.751	67.342	2.242	1.724	0.937	1.301	840
16	3.061	465.538	72.823	2.225	1.752	0.907	1.27	900
#10
1	4.886	628.472	100.171	3.785	1.643	0.581	2.303	0	Thresh = 426
2	5.155	647.21	99.449	3.728	1.76	0.661	2.118	60	Area > 2um^2
3	5.407	654.621	107.796	3.672	1.875	0.701	1.959	120	Tau:	308.5	s
4	5.516	665.486	108.687	3.582	1.961	0.77	1.826	180	Fusion Length:	1.87598	um
5	5.617	666.855	108.649	3.552	2.013	0.725	1.764	240	Tau/FusLength:	164.447	s/um
6	5.794	666.253	108.11	3.494	2.111	0.779	1.655	300
7	5.861	671.093	107.769	3.474	2.148	0.797	1.618	360
8	5.954	670.694	108.365	3.435	2.207	0.81	1.557	420
9	6.122	673.062	108.814	3.415	2.283	0.846	1.496	480
10	5.626	612.41	74.917	3.308	2.165	0.799	1.528	540
11	6.231	671.105	105.474	3.351	2.368	0.861	1.415	600
12	6.223	674.265	105.338	3.335	2.376	0.808	1.403	660
13	5.937	615.552	78.508	3.289	2.298	0.849	1.431	720
14	6.357	672.548	106.259	3.323	2.436	0.855	1.364	780
15	6.458	674.021	103.772	3.318	2.478	0.846	1.339	840
16	6.467	672.098	101.605	3.319	2.481	0.894	1.338	900
#11
1	5.34	717.405	123.477	3.711	1.832	0.563	2.026	0	Thresh = 465
2	5.55	726.944	122.578	3.68	1.92	0.649	1.916	60	Area > 2um^2
3	5.693	741.386	125.958	3.636	1.994	0.742	1.824	120	Tau:	414.5	s
4	5.735	754.677	125.531	3.589	2.034	0.722	1.764	180	Fusion Length:	1.85535	um
5	5.466	669.558	87.751	3.477	2.001	0.745	1.737	240	Tau/FusLength:	223.408	s/um
6	6.038	780.627	136.07	3.508	2.191	0.787	1.601	300
7	6.097	780.861	136.979	3.478	2.232	0.807	1.559	360
8	6.012	726.257	112.769	3.441	2.225	0.805	1.547	420
9	6.282	786.174	140.049	3.446	2.321	0.828	1.485	480
10	6.425	787.543	143.527	3.433	2.382	0.851	1.441	540
11	6.483	785.706	140.617	3.417	2.416	0.845	1.415	600
12	6.416	792.52	137.553	3.392	2.409	0.859	1.408	660
13	6.509	783.731	137.144	3.411	2.43	0.876	1.404	720
14	6.593	780.932	137.399	3.396	2.472	0.85	1.374	780
15	6.685	780.85	137.23	3.396	2.506	0.845	1.355	840
16	6.761	784.854	139.25	3.391	2.539	0.84	1.336	900
#12
1	7.77	667.622	101.105	4.877	2.029	0.543	2.404	0	Thresh = 457
2	7.905	672.566	96.226	4.832	2.083	0.564	2.32	60	Area > 2um^2
3	8.022	677.488	93.299	4.777	2.138	0.672	2.234	120	Tau:	591	s
4	8.106	679.98	92.253	4.74	2.177	0.663	2.177	180	Fusion Length:	2.40387	um
5	8.14	683.357	94.963	4.68	2.214	0.688	2.114	240	Tau/FusLength:	245.854	s/um
6	8.115	685.857	93.148	4.613	2.24	0.707	2.06	300
7	8.098	685.45	95.506	4.577	2.253	0.697	2.032	360
8	8.216	685.386	95.878	4.553	2.298	0.725	1.982	420
9	8.165	680.461	94.077	4.501	2.31	0.718	1.948	480
10	8.266	684.803	94.276	4.456	2.362	0.758	1.887	540
11	8.308	689.435	93.212	4.415	2.396	0.776	1.843	600
12	8.258	683.885	88.622	4.378	2.402	0.807	1.823	660
13	8.291	681.897	88.655	4.364	2.419	0.772	1.804	720
14	8.317	685.014	89.916	4.348	2.435	0.795	1.785	780
15	8.232	678.237	87.068	4.312	2.431	0.794	1.774	840
16	8.308	681.962	85.497	4.289	2.466	0.812	1.739	900
