# Supplementary material for: Condensation of LINE-1 is critical for retrotransposition
Source: eLife journal article supplement (doi:10.7554/elife.82991), 2023-04-28
Supplement: supp [file R261A_RNA_ORF1dropletFusionAnalysis.xlsx]

## Sheet: R261AprotOnly
#1	Area	Mean Int	StDev Int	Major Axis	Minor Axis	Circ	AR	Time (s)	Thresh = 1187
1	5.264	2073.89	347.776	3.448	1.944	0.679	1.774	0	Area > 2um^2
2	5.432	2080.82	345.227	3.295	2.099	0.807	1.569	60	Tau:	252.8	s
3	5.449	2088.58	343.776	3.208	2.163	0.842	1.484	120	Fusion Length:	1.70991	um
4	5.525	2079.28	342.385	3.177	2.214	0.854	1.435	180	Tau/FusLength:	147.844	s/um
5	5.575	2078.5	337.298	3.153	2.251	0.862	1.401	240
6	5.617	2047.09	347.869	3.136	2.281	0.864	1.375	300
7	5.567	2052.42	319.96	3.077	2.304	0.886	1.336	360
8	5.617	2050.42	334.348	3.1	2.307	0.894	1.344	420
9	6.139	2139.61	365.469	3.237	2.415	0.901	1.34	480
10	6.467	2140.61	340.808	3.263	2.523	0.884	1.293	540
11	6.618	2109.23	329.415	3.259	2.585	0.89	1.261	600
12	6.677	2115.62	320.823	3.246	2.619	0.902	1.239	660
13	6.71	2111.66	319.676	3.246	2.632	0.917	1.233	720
14	6.752	2112.2	317.709	3.231	2.661	0.923	1.214	780
15	6.786	2078.28	306.317	3.228	2.677	0.917	1.206	840
16	6.795	2082.19	304.699	3.213	2.692	0.91	1.193	900
#2
1	1.707	1503.26	275.524	1.992	1.091	0.798	1.825	0	Thresh = 888
2	1.699	1528.93	305.301	1.845	1.173	0.846	1.573	60	Area > 1um^2
3	1.665	1528.61	298.575	1.762	1.203	0.91	1.465	120	Tau:	148	s
4	1.682	1535.07	310.453	1.735	1.234	0.911	1.406	180	Fusion Length:	0.991459	um
5	1.673	1585.66	334.169	1.71	1.246	0.906	1.373	240	Tau/FusLength:	149.275	s/um
6	1.648	1574	330.097	1.687	1.244	0.922	1.356	300
7	1.64	1597.48	329.057	1.653	1.263	0.947	1.309	360
8	1.657	1589.54	323.745	1.677	1.258	0.926	1.333	420
9	1.615	1562.34	322.421	1.626	1.264	0.954	1.286	480
10	1.615	1607.18	324.651	1.643	1.251	0.954	1.313	540
11	1.648	1578.97	343.951	1.637	1.282	0.922	1.277	600
12	1.623	1581.37	324.433	1.629	1.268	0.928	1.284	660
13	1.598	1568.47	337.2	1.597	1.274	0.967	1.254	720
14	1.606	1563.81	320.564	1.586	1.289	0.94	1.23	780
15	1.606	1568.73	321.238	1.597	1.281	0.949	1.247	840
16	1.623	1549.99	334.025	1.557	1.327	0.95	1.173	900
#3
1	3.246	1388.37	382.764	2.921	1.415	0.533	2.065	0	Thresh = 659
2	3.246	1391.72	344.845	2.827	1.462	0.681	1.934	60	Area > 2um^2
3	3.338	1383.12	355.961	2.771	1.534	0.787	1.807	120	Tau:	228.7	s
4	3.271	1384.2	347.126	2.676	1.556	0.817	1.719	180	Fusion Length:	1.45979	um
5	3.296	1383.57	345.196	2.612	1.607	0.818	1.626	240	Tau/FusLength:	156.666	s/um
6	3.229	1407.3	353.338	2.577	1.596	0.863	1.615	300
7	3.271	1397.34	368.164	2.571	1.62	0.842	1.586	360
8	3.254	1399.85	361.195	2.516	1.647	0.884	1.528	420
9	3.254	1390.13	353.412	2.503	1.655	0.87	1.512	480
10	3.212	1386.37	336.931	2.475	1.652	0.859	1.498	540
11	3.221	1380.92	343.546	2.469	1.661	0.875	1.487	600
12	3.229	1372.05	341.221	2.463	1.669	0.877	1.476	660
13	3.204	1378.01	354.782	2.431	1.678	0.884	1.449	720
14	3.212	1365.25	340.321	2.438	1.678	0.88	1.453	780
15	3.162	1367.33	338.428	2.413	1.668	0.892	1.446	840
16	3.162	1357.45	337.384	2.41	1.67	0.872	1.443	900
#4
1	6.803	2015.47	465.538	4.005	2.163	0.527	1.852	0	Thresh = 951
2	7.013	2014.78	433.632	3.996	2.234	0.687	1.789	60	Area > 2um^2
3	6.98	2011.42	428.467	3.889	2.285	0.757	1.702	120	Tau:	299.3	s
4	7.005	1992.05	409.735	3.854	2.314	0.789	1.665	180	Fusion Length:	1.99606	um
5	6.98	1992.86	412.092	3.779	2.352	0.815	1.607	240	Tau/FusLength:	149.946	s/um
6	6.946	1995.2	409.984	3.741	2.364	0.819	1.583	300
7	6.98	1989.98	408.754	3.726	2.385	0.844	1.563	360
8	6.98	1994.3	406.064	3.69	2.408	0.853	1.533	420
9	6.921	1999.89	410.22	3.664	2.405	0.859	1.523	480
10	6.912	1993.07	393.518	3.633	2.422	0.854	1.5	540
11	6.98	1989.78	413.364	3.644	2.439	0.853	1.494	600
12	6.988	1981	400.061	3.622	2.457	0.85	1.474	660
13	6.971	1981.83	392.154	3.611	2.458	0.843	1.469	720
14	6.929	1979.78	401.664	3.584	2.462	0.856	1.456	780
15	6.752	1807.16	328.385	3.531	2.435	0.869	1.45	840
16	6.862	1990.64	394.026	3.558	2.456	0.874	1.449	900
#5
1	7.316	1763.32	327.012	4.558	2.044	0.596	2.23	0	Thresh = 1028
2	8.031	1851.02	339.334	4.458	2.294	0.753	1.944	60	Area > 2um^2
3	8.401	1846.28	335.351	4.302	2.486	0.806	1.731	120	Tau:	150.5	s
4	8.56	1840.78	324.488	4.188	2.603	0.86	1.609	180	Fusion Length:	2.26685	um
5	8.434	1797.4	307.096	4.061	2.645	0.864	1.535	240	Tau/FusLength:	66.3916	s/um
6	8.586	1846.55	313.326	4.051	2.699	0.883	1.501	300
7	8.628	1864.79	317.202	4.001	2.746	0.883	1.457	360
8	8.695	1850.3	319.272	3.971	2.788	0.878	1.424	420
9	8.729	1853.03	307.34	3.951	2.813	0.882	1.405	480
10	8.737	1850.15	308.634	3.947	2.819	0.882	1.4	540
11	8.821	1850.74	315.96	3.94	2.85	0.867	1.382	600
12	8.821	1842.66	313.321	3.918	2.867	0.887	1.367	660
13	8.813	1852.31	304.654	3.917	2.864	0.89	1.368	720
14	8.821	1844.4	306.338	3.9	2.88	0.875	1.354	780
15	8.863	1830	308.63	3.922	2.877	0.883	1.363	840
16	8.888	1837.87	307.37	3.903	2.899	0.877	1.346	900
#6
1	11.125	2001.67	378.63	5.725	2.474	0.463	2.314	0	Thresh = 988
2	11.588	2011.36	353.885	5.79	2.548	0.605	2.272	60	Area > 2um^2
3	11.79	2016.81	350.717	5.704	2.632	0.688	2.168	120	Tau:	393.9	s
4	11.806	2000.63	347.817	5.559	2.704	0.737	2.056	180	Fusion Length:	2.83601	um
5	11.815	1986.64	346.018	5.451	2.76	0.741	1.975	240	Tau/FusLength:	138.892	s/um
6	11.731	1987.99	343.782	5.352	2.791	0.772	1.918	300
7	11.529	1853.76	299.924	5.225	2.809	0.788	1.86	360
8	11.747	1996.4	355.252	5.184	2.886	0.794	1.796	420
9	11.823	1971.43	353.571	5.155	2.92	0.814	1.765	480
10	11.739	1968.35	355.01	5.103	2.929	0.824	1.742	540
11	11.764	1966.29	340.49	5.065	2.957	0.823	1.713	600
12	11.739	1951.57	340.388	5.034	2.969	0.824	1.696	660
13	11.747	1939.12	341.88	4.998	2.993	0.841	1.67	720
14	11.781	1935.81	339.346	4.958	3.025	0.831	1.639	780
15	11.714	1932.43	335.67	4.932	3.024	0.85	1.631	840
16	11.79	1932.85	343.543	4.962	3.025	0.832	1.64	900
#7
1	5.727	1964.13	335.434	3.769	1.935	0.631	1.948	0	Thresh = 1144
2	5.668	1982.07	335.349	3.547	2.034	0.776	1.744	60	Area > 2um^2
3	5.542	1983.64	339.986	3.35	2.106	0.819	1.59	120	Tau:	144.1	s
4	5.449	1989.22	351.961	3.23	2.148	0.852	1.504	180	Fusion Length:	1.88382	um
5	5.39	1993.56	351.334	3.145	2.182	0.829	1.441	240	Tau/FusLength:	76.4934	s/um
6	5.23	1891.75	304.6	3.074	2.167	0.863	1.419	300
7	5.365	1979.05	357.333	3.086	2.214	0.875	1.394	360
8	5.289	1986.05	349.333	3.053	2.206	0.877	1.384	420
9	5.357	1963.42	354.428	3.051	2.235	0.889	1.365	480
10	5.357	1974.87	349.297	3.042	2.242	0.863	1.357	540
11	5.34	1961.38	346.914	3.03	2.244	0.875	1.35	600
12	5.348	1942.73	334.988	3.009	2.263	0.914	1.329	660
13	5.457	1937.89	346.911	3.048	2.279	0.89	1.337	720
14	5.382	1936.52	335.296	3.007	2.279	0.893	1.319	780
15	5.382	1918.96	320.563	3.015	2.273	0.877	1.327	840
16	5.34	1933.67	323.379	3.019	2.252	0.897	1.341	900
#8
1	7.871	1766.82	359.072	4.268	2.348	0.635	1.817	0	Thresh = 1034
2	9.553	2017.71	389.301	4.321	2.815	0.794	1.535	60	Area > 2um^2
3	10.621	2048.33	353.351	4.352	3.107	0.846	1.401	120	Tau:	127.2	s
4	11.251	2058.11	331.92	4.375	3.274	0.878	1.336	180	Fusion Length:	2.12324	um
5	11.756	2021.52	325.517	4.419	3.387	0.884	1.305	240	Tau/FusLength:	59.9084	s/um
6	12.025	2017.32	313.277	4.443	3.446	0.887	1.289	300
7	12.26	1998.54	300.079	4.434	3.521	0.897	1.259	360
8	12.487	1985.25	303.726	4.441	3.58	0.898	1.24	420
9	12.597	1978.88	305.488	4.452	3.603	0.896	1.236	480
10	12.723	1973.33	297.314	4.451	3.64	0.895	1.223	540
11	12.824	1960.75	298.634	4.441	3.677	0.912	1.208	600
12	12.958	1962.87	294.659	4.436	3.72	0.894	1.192	660
13	12.992	1960.78	286.627	4.422	3.741	0.917	1.182	720
14	13.042	1959.32	287.522	4.41	3.766	0.91	1.171	780
15	13.101	1940.53	278.83	4.423	3.771	0.904	1.173	840
16	13.076	1919.51	274.331	4.412	3.774	0.895	1.169	900
#9
1	4.003	1348.57	275.097	3.27	1.559	0.669	2.098	0	Thresh = 793
2	4.146	1362	251.055	3.17	1.665	0.727	1.904	60	Area > 2um^2
3	4.196	1367.76	241.336	3.074	1.738	0.779	1.769	120	Tau:	211.1	s
4	4.255	1359.94	228.619	3.055	1.773	0.8	1.723	180	Fusion Length:	1.63323	um
5	4.272	1343.66	237.289	3.016	1.803	0.818	1.672	240	Tau/FusLength:	129.253	s/um
6	4.171	1353.93	223.475	2.963	1.792	0.825	1.653	300
7	4.171	1332.84	220.9	2.924	1.816	0.836	1.61	360
8	4.154	1335.83	224.836	2.882	1.835	0.828	1.571	420
9	4.289	1352.4	236.745	2.972	1.837	0.855	1.618	480
10	4.415	1353.21	235.813	2.993	1.878	0.846	1.593	540
11	4.532	1368.21	230.773	3.004	1.921	0.857	1.564	600
12	4.583	1358.64	233.173	2.998	1.946	0.866	1.54	660
13	4.642	1367.02	242.952	2.975	1.987	0.855	1.498	720
14	4.575	1370.63	242.422	2.94	1.981	0.865	1.484	780
15	4.633	1353.73	235.482	2.953	1.998	0.864	1.478	840
16	4.633	1333.07	224.09	2.943	2.005	0.853	1.468	900
#10
1	5.5	1933.24	353.138	4.08	1.716	0.467	2.377	0	Thresh = 1114
2	5.752	1930.82	323.85	4.043	1.811	0.682	2.232	60	Area > 2um^2
3	5.811	1925.28	320.799	3.942	1.877	0.741	2.1	120	Tau:	278.9	s
4	5.76	1940.88	321.878	3.812	1.924	0.763	1.981	180	Fusion Length:	2.01411	um
5	5.651	1925.45	319.676	3.686	1.952	0.781	1.889	240	Tau/FusLength:	138.473	s/um
6	5.634	1906.87	316.644	3.588	1.999	0.806	1.795	300
7	5.373	1877.74	313.827	3.488	1.961	0.826	1.779	360
8	5.609	1904.16	329.248	3.519	2.029	0.825	1.734	420
9	5.474	1892.19	308.103	3.439	2.027	0.818	1.697	480
10	5.399	1862.94	308.411	3.343	2.056	0.83	1.626	540
11	5.516	1876.3	313.031	3.402	2.065	0.834	1.648	600
12	5.407	1856.02	303.631	3.34	2.061	0.852	1.621	660
13	5.432	1853.85	314.154	3.312	2.088	0.846	1.586	720
14	5.382	1832.09	302.439	3.309	2.071	0.862	1.598	780
15	5.373	1846.52	309.657	3.281	2.085	0.861	1.574	840
16	5.256	1823.76	298.235	3.233	2.07	0.867	1.562	900
#11
1	6.08	1828.44	331.927	4.055	1.909	0.618	2.124	0	Thresh = 1073
2	6.004	1844.21	316.75	3.933	1.944	0.704	2.024	60	Area > 2um^2
3	6.147	1834.84	320.832	3.869	2.023	0.743	1.912	120	Tau:	221.1	s
4	6.088	1834.1	309.477	3.815	2.032	0.779	1.877	180	Fusion Length:	2.02403	um
5	6.029	1827.27	310.459	3.727	2.06	0.801	1.81	240	Tau/FusLength:	109.237	s/um
6	5.937	1807.73	300.259	3.65	2.071	0.797	1.763	300
7	5.886	1796.19	296.047	3.604	2.08	0.808	1.733	360
8	5.836	1789.59	290.674	3.556	2.089	0.82	1.702	420
9	5.996	1810.83	295.694	3.603	2.119	0.823	1.7	480
10	6.105	1809.84	293.634	3.658	2.125	0.795	1.721	540
11	6.248	1833.88	287.75	3.698	2.151	0.826	1.719	600
12	6.374	1831.28	301.305	3.731	2.175	0.808	1.715	660
13	6.349	1844.34	295.068	3.665	2.205	0.852	1.662	720
14	6.307	1826.16	290.993	3.661	2.193	0.83	1.669	780
15	6.332	1821.37	293.508	3.625	2.224	0.846	1.629	840
16	6.315	1818.51	288.302	3.632	2.214	0.835	1.641	900
#12
1	12.731	2213.85	380.826	5.236	3.096	0.635	1.691	0	Thresh = 1245
2	12.841	2220.03	376.568	5.127	3.189	0.75	1.608	60	Area > 2um^2
3	12.782	2202.64	381.338	5.009	3.249	0.774	1.542	120	Tau:	230.1	s
4	12.664	2197.71	379.469	4.889	3.298	0.813	1.482	180	Fusion Length:	2.57399	um
5	12.74	2209.44	378.363	4.851	3.344	0.809	1.451	240	Tau/FusLength:	89.3942	s/um
6	12.74	2193.75	383.945	4.811	3.372	0.824	1.427	300
7	12.614	2200.8	387.57	4.727	3.398	0.828	1.391	360
8	12.605	2193.6	377.797	4.699	3.415	0.856	1.376	420
9	12.656	2185.52	374.732	4.706	3.424	0.856	1.374	480
10	12.672	2173.87	367.131	4.67	3.455	0.857	1.352	540
11	12.647	2173.89	366.958	4.665	3.452	0.872	1.352	600
12	12.563	2166.18	369.8	4.617	3.464	0.867	1.333	660
13	12.572	2170.86	359.256	4.619	3.465	0.881	1.333	720
14	12.664	2160.68	357.699	4.629	3.484	0.867	1.329	780
15	12.563	2165.03	361.858	4.621	3.461	0.876	1.335	840
16	12.496	2150.08	354.006	4.589	3.467	0.876	1.324	900
#13
1	4.474	1624.1	332.66	3.555	1.602	0.622	2.218	0	Thresh = 944
2	4.633	1662.67	308.655	3.373	1.749	0.777	1.929	60	Area > 2um^2
3	4.6	1665.31	299.787	3.182	1.84	0.825	1.729	120	Tau:	141	s
4	4.633	1654.4	297.897	3.107	1.899	0.847	1.636	180	Fusion Length:	1.76881	um
5	4.583	1649.48	289.162	3.022	1.931	0.855	1.565	240	Tau/FusLength:	79.7144	s/um
6	4.6	1648.56	296.329	2.991	1.958	0.874	1.527	300
7	4.617	1624.87	280.684	2.987	1.968	0.85	1.518	360
8	4.541	1635.63	279.584	2.932	1.972	0.863	1.487	420
9	4.457	1546.12	253.26	2.872	1.976	0.875	1.454	480
10	4.566	1609.68	280.57	2.892	2.01	0.863	1.438	540
11	4.591	1626.02	282.258	2.89	2.022	0.889	1.429	600
12	4.566	1623.07	284.509	2.888	2.013	0.884	1.434	660
13	4.566	1621.93	270.169	2.901	2.004	0.884	1.447	720
14	4.575	1607.62	273.943	2.836	2.054	0.898	1.381	780
15	4.532	1599.26	272.934	2.853	2.022	0.89	1.411	840
16	4.549	1605.62	274.334	2.859	2.026	0.888	1.411	900
#14
1	6.147	2449.76	525.783	4.17	1.877	0.585	2.221	0	Thresh = 1379
2	7.366	2559.47	489.789	4.088	2.294	0.766	1.782	60	Area > 2um^2
3	8.014	2607.64	475.833	3.97	2.57	0.857	1.545	120	Tau:	123.9	s
4	8.502	2600.09	481.369	3.951	2.74	0.888	1.442	180	Fusion Length:	2.0746	um
5	8.796	2586.83	472.533	3.94	2.842	0.865	1.386	240	Tau/FusLength:	59.7224	s/um
6	9.023	2569.93	471.536	3.947	2.911	0.899	1.356	300
7	9.183	2547.71	478.475	3.898	2.999	0.915	1.3	360
8	9.267	2536.23	467.618	3.876	3.044	0.894	1.274	420
9	9.368	2520.79	471.938	3.862	3.089	0.9	1.25	480
10	9.511	2496.15	458.216	3.858	3.139	0.905	1.229	540
11	9.603	2507.17	455.356	3.86	3.168	0.894	1.219	600
12	9.645	2502.13	455.268	3.849	3.191	0.91	1.206	660
13	9.645	2489.05	451.106	3.85	3.19	0.889	1.207	720
14	9.57	2480.8	439.769	3.834	3.178	0.914	1.206	780
15	9.494	2448.67	428.582	3.795	3.185	0.895	1.191	840
16	9.696	2456	432.792	3.827	3.226	0.894	1.187	900

## Sheet: R261A1to10000RNA
#1	Area	Mean Int	StDev Int	Major Axis	Minor Axis	Circ	AR	Time (s)	Thresh = 815
1	1.32	1419.75	324.703	1.773	0.948	0.748	1.87	0	Area > 1um^2
2	1.295	1298.9	221.714	1.576	1.046	0.903	1.507	60	Tau:	106.7	s
3	1.438	1458.03	302.759	1.566	1.169	0.922	1.34	120	Fusion Length:	0.884364	um
4	1.455	1446.25	280.386	1.528	1.212	0.932	1.261	180	Tau/FusLength:	120.652	s/um
5	1.438	1464.28	277.521	1.49	1.229	0.954	1.212	240
6	1.497	1441.06	279.33	1.483	1.285	0.927	1.154	300
7	1.505	1430.53	264.517	1.502	1.276	0.965	1.177	360
8	1.539	1412.11	269.394	1.486	1.319	0.901	1.127	420
9	1.539	1394.18	241.745	1.498	1.308	0.931	1.146	480
10	1.53	1395.15	236.747	1.499	1.3	0.958	1.153	540
11	1.572	1400.27	235.511	1.475	1.357	0.951	1.087	600
12	1.53	1370.3	220.189	1.457	1.338	0.935	1.089	660
13	1.539	1364.91	207.387	1.475	1.329	0.909	1.11	720
14	1.581	1350.59	216.924	1.485	1.356	0.934	1.095	780
15	1.589	1335.36	206.581	1.491	1.357	0.939	1.099	840
16	1.615	1327.73	205.509	1.501	1.37	0.932	1.095	900
#2
1	1.732	1349.18	279.585	2.203	1.001	0.677	2.2	0	Thresh = 837
2	1.85	1568.74	330.247	1.807	1.304	0.876	1.386	60	Area > 1um^2
3	2.153	1600.34	311.789	1.803	1.52	0.913	1.187	120	Tau:	46.64	s
4	2.346	1589.28	284.777	1.887	1.583	0.949	1.192	180	Fusion Length:	1.09691	um
5	2.506	1586.71	282.603	1.897	1.682	0.926	1.127	240	Tau/FusLength:	42.5196	s/um
6	2.64	1539.11	266.197	1.948	1.726	0.924	1.129	300
7	2.716	1538.96	266.608	1.97	1.755	0.943	1.123	360
8	2.817	1498.21	254.406	1.991	1.802	0.921	1.105	420
9	2.8	1500.45	233.177	1.972	1.808	0.939	1.091	480
10	2.876	1497.37	244.628	1.986	1.844	0.924	1.077	540
11	2.893	1490.17	247.81	1.999	1.842	0.914	1.085	600
12	2.859	1476.92	219.98	2	1.821	0.958	1.098	660
13	2.918	1445.28	221.782	2.001	1.857	0.938	1.078	720
14	2.943	1434.65	223.129	2.017	1.858	0.93	1.085	780
15	2.952	1419.95	208.883	2.017	1.864	0.933	1.082	840
16	3.002	1399.83	216.921	2.052	1.862	0.911	1.102	900
#3
1	1.547	1172.83	244.806	1.952	1.009	0.669	1.935	0	Thresh = 731
2	1.564	1228.3	237.175	1.911	1.042	0.786	1.833	60	Area > 1um^2
3	1.581	1238.43	239.616	1.807	1.114	0.837	1.623	120	Tau:	193.9	s
4	1.581	1232.55	226.933	1.763	1.142	0.876	1.544	180	Fusion Length:	0.975442	um
5	1.564	1216.45	207.241	1.703	1.169	0.903	1.457	240	Tau/FusLength:	198.782	s/um
6	1.598	1247.88	224.229	1.716	1.186	0.914	1.447	300
7	1.615	1241.01	228.451	1.677	1.226	0.924	1.368	360
8	1.598	1221.24	212.49	1.671	1.217	0.893	1.373	420
9	1.589	1234.91	212.874	1.643	1.232	0.909	1.334	480
10	1.572	1237.84	204.124	1.649	1.214	0.929	1.359	540
11	1.572	1228.08	200.581	1.628	1.23	0.951	1.323	600
12	1.556	1250.05	198.86	1.613	1.228	0.95	1.314	660
13	1.623	1221.37	214.705	1.635	1.264	0.95	1.294	720
14	1.581	1203.68	199.04	1.631	1.234	0.876	1.321	780
15	1.606	1204.73	208.873	1.608	1.272	0.949	1.264	840
16	1.598	1186.85	194.743	1.618	1.258	0.944	1.286	900
#4
1	4.23	1328.08	217.97	3.689	1.46	0.541	2.527	0	Thresh = 791
2	4.373	1326.94	225.356	3.662	1.52	0.631	2.409	60	Area > 2um^2
3	4.457	1311.8	220.049	3.621	1.567	0.659	2.31	120	Tau:	527.8	s
4	4.423	1311.28	209.399	3.544	1.589	0.692	2.23	180	Fusion Length:	1.80398	um
5	4.415	1306.27	211.743	3.495	1.608	0.732	2.174	240	Tau/FusLength:	292.575	s/um
6	4.465	1314.49	212.402	3.49	1.629	0.737	2.142	300
7	4.406	1320.5	213.665	3.421	1.64	0.736	2.085	360
8	4.448	1317.99	210.897	3.386	1.673	0.757	2.024	420
9	4.406	1289.43	207.288	3.363	1.668	0.724	2.016	480
10	4.457	1298.38	204.374	3.325	1.707	0.785	1.948	540
11	4.482	1279.17	197.353	3.301	1.729	0.772	1.91	600
12	4.482	1289.58	195.593	3.282	1.739	0.796	1.887	660
13	4.474	1274.06	195.367	3.248	1.754	0.784	1.852	720
14	4.465	1268.48	187.085	3.225	1.763	0.779	1.83	780
15	4.44	1255.12	183.068	3.189	1.773	0.803	1.799	840
16	4.532	1272.92	196.734	3.218	1.793	0.809	1.794	900
#5
1	3.532	1089.74	173.965	2.883	1.56	0.529	1.848	0	Thresh = 786
2	4.011	1106.63	158.231	2.923	1.747	0.61	1.673	60	Area > 2um^2
3	4.465	1132.58	153.711	2.952	1.926	0.741	1.532	120	Tau:	173	s
4	4.675	1154.28	144.203	2.936	2.028	0.777	1.448	180	Fusion Length:	1.43662	um
5	4.945	1146.05	145.054	2.978	2.114	0.753	1.409	240	Tau/FusLength:	120.421	s/um
6	5.474	1127.87	148.559	3.153	2.211	0.631	1.426	300
7	5.634	1168.69	155.959	3.17	2.263	0.777	1.401	360
8	5.727	1167.21	150.206	3.146	2.317	0.827	1.358	420
9	5.718	1157.51	135.733	3.141	2.318	0.859	1.355	480
10	5.844	1138.97	134.25	3.148	2.364	0.817	1.331	540
11	5.912	1126.76	133.874	3.159	2.383	0.849	1.326	600
12	5.979	1114.68	128	3.135	2.428	0.859	1.291	660
13	6.055	1114.32	126.218	3.153	2.445	0.86	1.289	720
14	6.071	1113.1	127.834	3.14	2.462	0.849	1.276	780
15	6.029	1085.29	120.696	3.133	2.45	0.866	1.279	840
16	6.122	1091.68	118.821	3.158	2.468	0.825	1.279	900
#6
1	2.884	651.755	79.542	2.732	1.344	0.654	2.032	0	Thresh = 482
2	3.137	688.483	89.691	2.738	1.459	0.726	1.877	60	Area > 1um^2
3	3.195	705.75	96.851	2.701	1.506	0.795	1.793	120	Tau:	234.5	s
4	3.195	713.642	96.408	2.63	1.547	0.812	1.701	180	Fusion Length:	1.36582	um
5	3.254	715.145	97.782	2.617	1.583	0.805	1.653	240	Tau/FusLength:	171.691	s/um
6	3.204	720.147	96.925	2.567	1.589	0.815	1.615	300
7	3.229	729.964	100.286	2.568	1.601	0.821	1.605	360
8	3.221	715.363	100.421	2.521	1.626	0.796	1.55	420
9	3.237	713.104	99.39	2.528	1.631	0.823	1.55	480
10	3.305	733.349	104.592	2.524	1.667	0.81	1.514	540
11	3.263	727.608	96.532	2.515	1.652	0.817	1.523	600
12	3.288	728.668	98.98	2.496	1.678	0.873	1.488	660
13	3.263	721.979	95.193	2.47	1.682	0.817	1.468	720
14	3.322	711.458	92.806	2.498	1.693	0.832	1.476	780
15	3.305	708.226	89.278	2.49	1.69	0.827	1.473	840
16	3.322	712.906	91.948	2.487	1.7	0.809	1.463	900
#7
1	1.942	963.087	192.492	2.224	1.112	0.658	1.999	0	Thresh = 595
2	1.892	1005.5	161.986	2.009	1.199	0.825	1.675	60	Area > 1um^2
3	1.951	1007.12	167.239	1.943	1.279	0.876	1.519	120	Tau:	175.7	s
4	1.959	1012.08	168.274	1.871	1.333	0.872	1.404	180	Fusion Length:	1.112	um
5	1.976	1009.44	172.251	1.823	1.38	0.952	1.321	240	Tau/FusLength:	158.004	s/um
6	1.968	1005.07	167.957	1.778	1.409	0.92	1.261	300
7	1.976	993.349	154.933	1.741	1.445	0.905	1.205	360
8	1.976	994.515	159.516	1.738	1.448	0.898	1.2	420
9	1.968	986.504	154.285	1.709	1.466	0.92	1.166	480
10	1.959	994.206	161.065	1.697	1.47	0.909	1.154	540
11	2.01	979.209	157.955	1.696	1.509	0.94	1.123	600
12	1.976	964.821	147.618	1.655	1.521	0.898	1.088	660
13	1.993	964.253	152.401	1.658	1.531	0.952	1.083	720
14	1.993	950.245	143.41	1.652	1.536	0.952	1.075	780
15	1.993	960.173	143.363	1.67	1.52	0.952	1.099	840
16	1.959	952.009	137.14	1.65	1.512	0.964	1.091	900
#8
1	4.877	1042.47	145.962	3.535	1.757	0.709	2.012	0	Thresh = 663
2	5.18	1061.19	150.327	3.557	1.854	0.757	1.918	60	Area > 2um^2
3	5.399	1080.07	152.085	3.573	1.924	0.767	1.857	120	Tau:	451.1	s
4	5.525	1058.3	144.13	3.543	1.986	0.781	1.784	180	Fusion Length:	1.76747	um
5	5.592	1052.03	137.637	3.465	2.055	0.817	1.686	240	Tau/FusLength:	255.224	s/um
6	5.642	1057.19	135.192	3.429	2.095	0.834	1.637	300
7	5.735	1048.97	136.438	3.416	2.138	0.857	1.598	360
8	5.777	1045.37	137.01	3.372	2.181	0.822	1.546	420
9	5.853	1048.16	139.99	3.373	2.209	0.875	1.527	480
10	5.802	1047.6	133.915	3.319	2.226	0.867	1.491	540
11	5.878	1033.46	135.222	3.307	2.263	0.827	1.462	600
12	5.844	1001.13	120.671	3.258	2.284	0.865	1.426	660
13	5.928	997.409	120.023	3.255	2.319	0.876	1.403	720
14	5.912	1015.54	122.967	3.211	2.344	0.861	1.37	780
15	5.928	996.818	116.997	3.224	2.341	0.886	1.377	840
16	5.903	982.999	110.428	3.209	2.342	0.878	1.37	900
#9
1	2.607	933.81	188.807	2.467	1.345	0.71	1.834	0	Thresh = 584
2	2.632	980.198	199.03	2.271	1.475	0.846	1.539	60	Area > 2um^2
3	2.573	999.859	197.605	2.091	1.567	0.941	1.334	120	Tau:	125.3	s
4	2.556	1021.03	203.764	1.998	1.629	0.927	1.227	180	Fusion Length:	1.22845	um
5	2.531	1035.65	195.469	1.969	1.637	0.925	1.203	240	Tau/FusLength:	101.998	s/um
6	2.548	1035.7	206.298	1.91	1.698	0.924	1.125	300
7	2.582	1034.57	203.062	1.918	1.713	0.936	1.12	360
8	2.64	1044.36	214.911	1.883	1.785	0.872	1.055	420
9	2.657	1039.6	210.897	1.874	1.806	0.947	1.038	480
10	2.674	1024.83	197.528	1.894	1.798	0.953	1.053	540
11	2.699	1040.99	194.764	1.903	1.806	0.937	1.053	600
12	2.716	1036.97	192.248	1.925	1.796	0.943	1.072	660
13	2.775	1033.72	195.921	1.922	1.839	0.964	1.045	720
14	2.75	1040.68	193.962	1.927	1.817	0.938	1.06	780
15	2.792	1032.64	201.05	1.945	1.828	0.952	1.064	840
16	2.817	1041.64	201.496	1.948	1.841	0.961	1.058	900
#10
1	10.31	879.948	176.84	5.292	2.48	0.605	2.134	0	Thresh = 521
2	10.419	886.584	173.402	5.284	2.51	0.614	2.105	60	Area > 2um^2
3	10.553	887.973	169.038	5.261	2.554	0.656	2.06	120	Tau:	917.3	s
4	10.562	863.469	158.015	5.227	2.573	0.679	2.031	180	Fusion Length:	2.64079	um
5	10.646	870.682	158.317	5.186	2.614	0.705	1.984	240	Tau/FusLength:	347.358	s/um
6	10.78	879.814	157.601	5.143	2.669	0.729	1.927	300
7	10.806	869.191	153.415	5.128	2.683	0.717	1.911	360
8	10.789	852.412	147.777	5.101	2.693	0.744	1.894	420
9	10.696	827.708	139.104	5.058	2.693	0.703	1.878	480
10	10.755	823.768	136.811	5.019	2.729	0.756	1.839	540
11	10.688	811.577	131.039	4.981	2.732	0.758	1.823	600
12	10.696	790.965	124.762	4.95	2.751	0.764	1.799	660
13	10.73	785.241	120.796	4.924	2.774	0.744	1.775	720
14	10.73	786.947	120.621	4.881	2.799	0.729	1.744	780
15	10.646	771.764	117.227	4.858	2.79	0.776	1.741	840
16	10.663	756.35	110.372	4.822	2.816	0.759	1.712	900
#11
1	3.002	977.86	160.446	2.583	1.48	0.763	1.746	0	Thresh = 604
2	3.002	988.888	163.756	2.465	1.551	0.85	1.589	60	Area > 2um^2
3	2.926	988.187	158.025	2.36	1.579	0.897	1.494	120	Tau:	160.8	s
4	3.002	992.303	163.484	2.326	1.643	0.884	1.416	180	Fusion Length:	1.27767	um
5	2.968	1012.9	158.152	2.272	1.663	0.894	1.366	240	Tau/FusLength:	125.854	s/um
6	3.002	992.476	154.622	2.27	1.684	0.884	1.348	300
7	2.994	993.556	152.013	2.246	1.697	0.902	1.323	360
8	2.943	974.777	140.334	2.223	1.686	0.866	1.319	420
9	2.943	975.889	141.017	2.213	1.694	0.887	1.307	480
10	2.918	969.582	141.469	2.178	1.706	0.922	1.276	540
11	2.943	947.709	137.55	2.183	1.716	0.923	1.272	600
12	2.91	937.965	129.768	2.168	1.708	0.919	1.269	660
13	2.876	946.74	131.798	2.163	1.693	0.887	1.277	720
14	2.884	929.283	123.816	2.156	1.703	0.89	1.266	780
15	2.825	920.557	117.651	2.14	1.681	0.902	1.273	840
16	2.876	927.675	123.711	2.153	1.701	0.924	1.265	900

## Sheet: R261A1to3000RNA
#1	Area	Mean Int	StDev Int	Major Axis	Minor Axis	Circ	AR	Time (s)	Thresh = 683
1	2.884	1123.74	378.884	2.893	1.269	0.563	2.279	0	Area > 1um^2
2	2.96	1123.03	364.475	2.886	1.306	0.66	2.211	60	Tau:	713.2	s
3	3.061	1116.41	355.426	2.878	1.354	0.685	2.125	120	Fusion Length:	1.43557	um
4	3.111	1136.51	359.37	2.847	1.392	0.731	2.046	180	Tau/FusLength:	496.807	s/um
5	3.111	1140.84	353.8	2.829	1.4	0.774	2.021	240
6	3.153	1142.23	351.246	2.775	1.447	0.797	1.918	300
7	3.246	1130.72	344.98	2.792	1.48	0.791	1.887	360
8	3.221	1146.66	353.26	2.747	1.493	0.814	1.84	420
9	3.229	1159.35	359.35	2.707	1.519	0.828	1.783	480
10	3.254	1157.47	354.826	2.695	1.537	0.822	1.753	540
11	3.212	1141.91	344.94	2.656	1.54	0.842	1.724	600
12	3.263	1146.02	347.438	2.612	1.591	0.807	1.642	660
13	3.296	1130.56	335.03	2.636	1.592	0.851	1.656	720
14	3.33	1139.82	342.141	2.608	1.626	0.829	1.604	780
15	3.229	1145.39	335.788	2.543	1.617	0.865	1.573	840
16	3.33	1112.74	318.477	2.584	1.641	0.86	1.575	900
#2
1	5.365	914.52	132.938	3.966	1.722	0.606	2.303	0	Thresh = 575
2	5.525	934.788	126.83	3.964	1.775	0.68	2.234	60	Area > 1um^2
3	5.693	939.16	124.484	3.939	1.84	0.69	2.141	120	Tau:	542.7	s
4	5.811	927.129	128.667	3.928	1.884	0.738	2.085	180	Fusion Length:	1.96575	um
5	5.827	924.961	121.778	3.875	1.915	0.74	2.024	240	Tau/FusLength:	276.078	s/um
6	5.853	895.039	110.887	3.86	1.93	0.747	2	300
7	5.97	910.293	120.629	3.844	1.977	0.75	1.944	360
8	5.987	891.784	112.773	3.83	1.99	0.76	1.924	420
9	6.004	875.552	109.675	3.784	2.02	0.763	1.873	480
10	6.046	866.453	107.351	3.771	2.042	0.788	1.847	540
11	6.08	863.485	105.484	3.769	2.054	0.793	1.835	600
12	6.088	858.838	100.709	3.725	2.081	0.803	1.79	660
13	6.088	844.079	100.29	3.702	2.094	0.803	1.768	720
14	5.987	841.708	96.326	3.645	2.091	0.798	1.743	780
15	6.088	834.068	95.436	3.664	2.116	0.79	1.732	840
16	6.088	823.298	92.405	3.638	2.131	0.815	1.707	900
#3
1	5.045	865.877	204.452	3.475	1.849	0.664	1.879	0	Thresh = 508
2	5.735	931.152	192.711	3.632	2.011	0.738	1.806	60	Area > 1um^2
3	6.164	949.655	186.043	3.679	2.133	0.797	1.725	120	Tau:	360.8	s
4	6.467	973.342	185.9	3.639	2.262	0.827	1.609	180	Fusion Length:	1.73392	um
5	6.71	1002.02	187.86	3.624	2.357	0.842	1.538	240	Tau/FusLength:	208.084	s/um
6	6.921	1004.82	181.864	3.605	2.444	0.872	1.475	300
7	7.131	1009.47	179.935	3.613	2.513	0.862	1.438	360
8	7.257	998.126	168.328	3.589	2.574	0.869	1.394	420
9	7.358	980.165	161.349	3.582	2.615	0.903	1.37	480
10	7.568	986.231	168.018	3.595	2.68	0.889	1.341	540
11	7.585	980.763	156.319	3.569	2.706	0.881	1.319	600
12	7.728	965.361	157.054	3.582	2.747	0.885	1.304	660
13	7.879	984.726	160.532	3.597	2.789	0.906	1.289	720
14	7.921	971.413	150.848	3.588	2.811	0.898	1.277	780
15	8.022	976.964	152.835	3.55	2.877	0.919	1.234	840
16	8.148	954.972	147.565	3.564	2.911	0.911	1.224	900
#4
1	5.87	684.466	95.77	4.162	1.796	0.583	2.318	0	Thresh = 476
2	5.996	691.784	88.132	4.166	1.833	0.607	2.273	60	Area > 2um^2
3	6.164	687.113	85.798	4.175	1.88	0.638	2.221	120	Tau:	519.7	s
4	6.374	686.877	85.015	4.154	1.954	0.694	2.127	180	Fusion Length:	2.06139	um
5	6.315	678.297	78.578	4.117	1.953	0.712	2.108	240	Tau/FusLength:	252.111	s/um
6	6.525	684.972	79.926	4.115	2.019	0.721	2.038	300
7	6.584	677.439	76.185	4.124	2.033	0.714	2.029	360
8	6.677	682.719	77.815	4.103	2.072	0.756	1.98	420
9	6.719	675.438	72.521	4.063	2.106	0.742	1.929	480
10	6.879	674.779	73.941	4.081	2.146	0.767	1.902	540
11	6.895	676.479	73.474	4.072	2.156	0.769	1.889	600
12	6.895	660.301	71.558	4.026	2.181	0.717	1.846	660
13	6.98	667.964	69.359	4.068	2.185	0.779	1.862	720
14	7.03	663.495	68.678	4.05	2.21	0.773	1.832	780
15	7.022	659.781	68.49	4.036	2.215	0.743	1.822	840
16	7.03	656.894	62.427	4.019	2.227	0.784	1.804	900
#5
1	3.364	509.715	67.94	3.13	1.368	0.579	2.288	0	Thresh = 360
2	3.473	516.785	70.274	3.107	1.423	0.665	2.183	60	Area > 2um^2
3	3.498	507.209	63.083	3.085	1.444	0.658	2.137	120	Tau:	533.9	s
4	3.549	506.777	64.012	3.071	1.471	0.706	2.087	180	Fusion Length:	1.55255	um
5	3.54	500.223	60.593	3.036	1.485	0.714	2.045	240	Tau/FusLength:	343.886	s/um
6	3.549	505.23	63.573	3.01	1.501	0.759	2.006	300
7	3.624	510.615	63.835	3	1.538	0.771	1.95	360
8	3.616	499.219	57.361	2.962	1.554	0.743	1.906	420
9	3.582	495.021	55.995	2.941	1.551	0.709	1.896	480
10	3.607	491.807	53.671	2.935	1.565	0.782	1.875	540
11	3.675	499.922	61.347	2.931	1.596	0.786	1.837	600
12	3.633	492.785	55.457	2.895	1.598	0.804	1.811	660
13	3.658	490.977	56.297	2.869	1.623	0.778	1.767	720
14	3.683	483.694	54.581	2.887	1.624	0.783	1.778	780
15	3.624	488.084	53.428	2.867	1.61	0.771	1.781	840
16	3.633	485.481	54.98	2.833	1.633	0.799	1.735	900
#6
1	10.259	602.516	75.802	5.4	2.419	0.563	2.232	0	Thresh = 411
2	10.436	595.212	71.413	5.448	2.439	0.605	2.233	60	Area > 1um^2
3	10.646	604.923	72.684	5.458	2.483	0.64	2.198	120	Tau:	1204	s
4	10.73	592.289	66.893	5.427	2.517	0.65	2.156	180	Fusion Length:	2.68534	um
5	10.797	590.034	65.282	5.423	2.535	0.661	2.139	240	Tau/FusLength:	448.361	s/um
6	10.848	579.346	61.889	5.401	2.557	0.676	2.112	300
7	11.041	589.043	62.333	5.418	2.595	0.683	2.088	360
8	11.218	593.421	64.855	5.419	2.635	0.689	2.056	420
9	11.251	583.736	63.376	5.404	2.651	0.719	2.038	480
10	11.327	582.16	61.462	5.409	2.666	0.703	2.029	540
11	11.403	573.879	58.137	5.384	2.696	0.713	1.997	600
12	11.411	578.713	58.767	5.372	2.704	0.721	1.987	660
13	11.403	572.638	54.955	5.332	2.723	0.736	1.958	720
14	11.504	567.455	54.504	5.332	2.747	0.732	1.941	780
15	11.487	560.037	53.252	5.309	2.755	0.71	1.927	840
16	11.605	561.167	54.342	5.343	2.765	0.728	1.932	900
#7
1	4.188	868.131	159.233	3.096	1.722	0.633	1.798	0	Thresh = 562
2	4.684	847.192	152.775	3.068	1.944	0.556	1.578	60	Area > 1um^2
3	5.012	858.052	144.048	3.113	2.05	0.63	1.519	120	Tau:	208.3	s
4	5.172	862.153	133.106	3.116	2.113	0.66	1.475	180	Fusion Length:	1.53819	um
5	5.432	854.574	126.691	3.175	2.179	0.712	1.457	240	Tau/FusLength:	135.419	s/um
6	5.584	849.334	115.01	3.18	2.236	0.748	1.422	300
7	5.836	851.54	114.549	3.227	2.302	0.769	1.402	360
8	6.046	857.677	117.992	3.241	2.375	0.792	1.365	420
9	6.13	847.162	105.716	3.25	2.402	0.812	1.353	480
10	6.29	857.642	108.456	3.275	2.446	0.824	1.339	540
11	6.315	836.972	97.794	3.281	2.451	0.802	1.339	600
12	6.416	831.419	95.884	3.29	2.483	0.819	1.325	660
13	6.45	820.119	91.115	3.269	2.512	0.845	1.301	720
14	6.534	829.817	90.919	3.275	2.541	0.869	1.289	780
15	6.652	827.265	93.61	3.308	2.56	0.849	1.292	840
16	6.626	808.094	83.701	3.274	2.577	0.882	1.271	900
#8
1	3.313	488.769	74.537	2.62	1.61	0.655	1.627	0	Thresh = 355
2	3.397	485.252	64.942	2.612	1.656	0.635	1.578	60	Area > 2um^2
3	3.574	503.461	69.212	2.59	1.757	0.667	1.474	120	Tau:	330.9	s
4	3.767	494.317	64.286	2.631	1.823	0.76	1.443	180	Fusion Length:	1.27519	um
5	3.86	496.052	64.036	2.631	1.868	0.77	1.408	240	Tau/FusLength:	259.492	s/um
6	3.994	496.248	60.489	2.659	1.912	0.821	1.39	300
7	4.062	491.907	57.966	2.664	1.941	0.819	1.372	360
8	4.078	488.231	55.548	2.634	1.971	0.834	1.336	420
9	4.221	487.629	56.542	2.686	2.001	0.809	1.343	480
10	4.272	485.175	55.03	2.685	2.025	0.818	1.326	540
11	4.314	480.53	52.043	2.666	2.06	0.811	1.294	600
12	4.297	472.481	48.772	2.641	2.071	0.808	1.275	660
13	4.39	473.05	49.483	2.67	2.093	0.825	1.275	720
14	4.415	464.343	45.375	2.681	2.097	0.846	1.279	780
15	4.406	467.595	45.169	2.63	2.133	0.877	1.233	840
16	4.474	461.835	44.482	2.67	2.133	0.841	1.252	900
#9
1	3.565	653.215	99.512	3.061	1.483	0.696	2.064	0	Thresh = 460
2	3.75	660.289	93.904	2.976	1.605	0.786	1.854	60	Area > 2um^2
3	3.826	650.277	83.766	2.943	1.656	0.787	1.777	120	Tau:	213.7	s
4	3.952	664.309	85.567	2.919	1.724	0.797	1.693	180	Fusion Length:	1.52976	um
5	4.087	652.016	82.77	2.927	1.777	0.829	1.647	240	Tau/FusLength:	139.695	s/um
6	4.112	643.143	73.174	2.9	1.805	0.818	1.607	300
7	4.205	638.772	73.945	2.895	1.849	0.83	1.566	360
8	4.247	633.463	72.385	2.9	1.864	0.861	1.556	420
9	4.255	632.504	70.596	2.914	1.859	0.82	1.567	480
10	4.289	622.427	67.121	2.878	1.898	0.853	1.517	540
11	4.305	618.98	63.099	2.864	1.914	0.857	1.496	600
12	4.305	612.902	60.496	2.859	1.918	0.885	1.491	660
13	4.322	601.317	57.544	2.843	1.936	0.884	1.468	720
14	4.28	595.91	51.732	2.812	1.938	0.88	1.451	780
15	4.314	603.103	54.012	2.834	1.938	0.837	1.462	840
16	4.339	600.479	55.833	2.836	1.948	0.875	1.455	900
#10
1	6.668	713.108	114.098	3.689	2.302	0.776	1.603	0	Thresh = 440
2	7.106	747.412	124.313	3.776	2.396	0.81	1.576	60	Area > 2um^2
3	7.274	753.749	124.948	3.763	2.461	0.838	1.529	120	Tau:	682.9	s
4	7.56	768.349	130.159	3.801	2.532	0.85	1.501	180	Fusion Length:	1.78686	um
5	7.77	760.665	125.192	3.793	2.608	0.865	1.454	240	Tau/FusLength:	382.178	s/um
6	7.98	754.967	121.579	3.841	2.645	0.855	1.452	300
7	8.165	743.748	114.452	3.874	2.684	0.866	1.443	360
8	8.426	759.203	118.205	3.895	2.754	0.864	1.414	420
9	8.552	764.492	116.138	3.901	2.791	0.86	1.398	480
10	8.636	755.696	108.651	3.895	2.823	0.886	1.38	540
11	8.787	751.57	106.394	3.905	2.865	0.86	1.363	600
12	8.93	748.575	105.892	3.91	2.908	0.866	1.345	660
13	9.09	759.305	107.095	3.921	2.952	0.87	1.329	720
14	9.141	746.724	100.245	3.92	2.969	0.883	1.32	780
15	9.267	742.412	98.988	3.932	3.001	0.879	1.31	840
16	9.326	731.462	98.185	3.916	3.032	0.893	1.291	900
#11
1	4.49	641.395	92.041	3.107	1.84	0.638	1.688	0	Thresh = 456
2	4.667	648.944	94.238	3.087	1.925	0.678	1.603	60	Area > 1um^2
3	4.785	645.559	87.17	3.079	1.979	0.704	1.556	120	Tau:	475.8	s
4	4.995	643.946	87.605	3.141	2.025	0.726	1.551	180	Fusion Length:	1.52685	um
5	5.087	646.983	82.849	3.141	2.062	0.736	1.523	240	Tau/FusLength:	311.621	s/um
6	5.256	644.688	83.13	3.164	2.115	0.726	1.496	300
7	5.34	643.559	80.033	3.159	2.152	0.755	1.468	360
8	5.474	645.341	79.957	3.168	2.2	0.753	1.44	420
9	5.483	639.782	76.899	3.153	2.214	0.806	1.424	480
10	5.592	644.62	77.601	3.147	2.263	0.791	1.391	540
11	5.701	639.15	75.289	3.176	2.285	0.788	1.39	600
12	5.785	643.01	76.962	3.205	2.299	0.775	1.394	660
13	5.895	641.777	76.971	3.189	2.354	0.815	1.355	720
14	5.903	634.865	71.357	3.206	2.344	0.829	1.367	780
15	6.012	636.856	72.749	3.204	2.389	0.844	1.341	840
16	6.012	630.726	68.729	3.197	2.394	0.779	1.336	900
