# Supplementary material for: Condensation of LINE-1 is critical for retrotransposition
Source: eLife journal article supplement (doi:10.7554/elife.82991), 2023-04-28
Supplement: supp [file StammerAAA_RNA_ORF1dropletFusionAnalysis.xlsx]

## Sheet: StamAAAprotOnly
#1	Area	Mean Int	StDev Int	Major Axis	Minor Axis	Circ	AR	Time (s)	Thresh = 2499
1	1.219	3886.37	802.591	1.546	1.004	0.829	1.539	0	Area > 0.5um^2
2	1.06	3734.42	687.541	1.378	0.979	0.862	1.407	60	Tau:	198.4	s
3	1.219	3994.23	851.86	1.444	1.075	0.905	1.343	120	Fusion Length:	0.737677	um
4	1.186	4051.4	842.089	1.403	1.076	0.904	1.303	180	Tau/FusLength:	268.952	s/um
5	1.202	4081.06	850.441	1.362	1.124	0.941	1.212	240
6	1.202	4193.06	883.896	1.353	1.132	0.941	1.195	300
7	1.211	4202.65	888.059	1.357	1.136	0.889	1.195	360
8	1.219	4243.65	900.933	1.365	1.138	0.929	1.199	420
9	1.245	4213.03	922.244	1.364	1.162	0.948	1.175	480
10	1.261	4270.55	983.117	1.349	1.19	0.936	1.134	540
11	1.245	4234.34	977.83	1.344	1.179	0.948	1.14	600
12	1.261	4326.17	1005.11	1.348	1.192	0.961	1.131	660
13	1.27	4390.05	1010.53	1.326	1.219	0.932	1.087	720
14	1.287	4414.61	1004.78	1.351	1.213	0.98	1.114	780
15	1.32	4338.28	1019.08	1.389	1.21	0.955	1.147	840
16	1.329	4403.8	1022.82	1.379	1.227	0.927	1.124	900
#2
1	1.102	255	0	1.61	0.871	0.818	1.848	0	Thresh = 2596
2	1.135	255	0	1.621	0.892	0.821	1.818	60	Area > 0.5um^2
3	1.16	255	0	1.588	0.93	0.839	1.708	120	Tau:	382.6	s
4	1.177	255	0	1.59	0.943	0.874	1.686	180	Fusion Length:	0.80229	um
5	1.202	255	0	1.535	0.998	0.87	1.539	240	Tau/FusLength:	476.885	s/um
6	1.202	255	0	1.535	0.998	0.848	1.538	300
7	1.186	255	0	1.515	0.996	0.89	1.521	360
8	1.194	255	0	1.532	0.992	0.864	1.543	420
9	1.261	255	0	1.533	1.048	0.88	1.463	480
10	1.253	255	0	1.514	1.054	0.93	1.436	540
11	1.228	255	0	1.468	1.065	0.936	1.379	600
12	1.211	255	0	1.463	1.054	0.899	1.387	660
13	1.219	255	0	1.48	1.049	0.882	1.411	720
14	1.253	255	0	1.489	1.071	0.955	1.39	780
15	1.253	255	0	1.489	1.071	0.906	1.39	840
16	1.236	255	0	1.436	1.096	0.978	1.311	900
#4
1	1.068	3194.36	734.763	1.675	0.812	0.662	2.064	0	Thresh = 1856
2	1.11	3420.51	827.619	1.668	0.848	0.763	1.968	60	Area > 0.5um^2
3	1.118	3431.38	853.63	1.621	0.879	0.742	1.844	120	Tau:	312.5	s
4	1.118	3449.66	847.033	1.589	0.896	0.735	1.774	180	Fusion Length:	0.837112	um
5	1.118	3482	828.063	1.565	0.91	0.788	1.72	240	Tau/FusLength:	373.307	s/um
6	1.11	3509.08	856.658	1.567	0.902	0.782	1.738	300
7	1.102	3554.98	829.39	1.564	0.897	0.827	1.744	360
8	1.118	3517.2	818.929	1.53	0.931	0.8	1.644	420
9	1.144	3520.01	845.102	1.55	0.94	0.806	1.649	480
10	1.135	3527.07	840.974	1.51	0.957	0.852	1.577	540
11	1.152	3535.94	862.048	1.506	0.974	0.888	1.546	600
12	1.169	3542.45	891.369	1.535	0.97	0.877	1.583	660
13	1.118	3644.54	839.89	1.475	0.966	0.862	1.527	720
14	1.118	3670.32	891.847	1.475	0.966	0.862	1.527	780
15	1.169	3657.95	945.919	1.528	0.974	0.845	1.568	840
16	1.16	3674.85	941.459	1.501	0.984	0.894	1.525	900
#5
1	0.875	4182.06	753.172	1.414	0.787	0.839	1.797	0	Thresh = 2719
2	1.051	4500.85	941.106	1.429	0.937	0.889	1.526	60	Area > 0.5um^2
3	1.009	4295.03	844.664	1.403	0.916	0.877	1.532	120	Tau:	364.5	s
4	1.102	4737.21	1018.25	1.43	0.981	0.906	1.458	180	Fusion Length:	0.702459	um
5	1.102	4701.76	991.444	1.428	0.982	0.931	1.453	240	Tau/FusLength:	518.891	s/um
6	1.169	4965.91	1072.74	1.472	1.011	0.891	1.455	300
7	1.186	4949.02	1068.13	1.475	1.024	0.904	1.441	360
8	1.186	5006.34	1065.79	1.431	1.055	0.928	1.357	420
9	1.194	5075.97	1079.42	1.432	1.061	0.92	1.35	480
10	1.211	5057.15	1086.08	1.428	1.08	0.923	1.323	540
11	1.228	5076.26	1125.27	1.432	1.092	0.911	1.311	600
12	1.228	5126.58	1141.73	1.429	1.094	0.936	1.307	660
13	1.236	5039.21	1132.66	1.41	1.116	0.942	1.263	720
14	1.236	5009.13	1113.8	1.402	1.123	0.942	1.248	780
15	1.245	5031.58	1136.81	1.397	1.134	0.948	1.232	840
16	1.253	5014.58	1160.66	1.393	1.145	0.955	1.216	900
#6
1	1.446	3668.95	759.936	1.797	1.025	0.794	1.753	0	Thresh = 2108
2	1.463	3720.34	783.118	1.728	1.078	0.837	1.602	60	Area > 0.5um^2
3	1.463	3760.03	793.741	1.677	1.111	0.837	1.509	120	Tau:	338.1	s
4	1.438	3801.04	778.526	1.644	1.114	0.87	1.475	180	Fusion Length:	0.88955	um
5	1.43	3794.93	778.851	1.624	1.12	0.865	1.45	240	Tau/FusLength:	380.08	s/um
6	1.43	3798.09	788.044	1.595	1.141	0.886	1.397	300
7	1.413	3811.24	775.805	1.576	1.141	0.897	1.38	360
8	1.43	3795.14	799.571	1.559	1.167	0.886	1.336	420
9	1.438	3781.58	805.626	1.54	1.189	0.922	1.295	480
10	1.421	3758.62	796.032	1.528	1.184	0.902	1.29	540
11	1.413	3761.29	755.05	1.496	1.202	0.961	1.245	600
12	1.387	3814.38	770.65	1.477	1.196	0.911	1.234	660
13	1.387	3787.24	769.264	1.468	1.204	0.934	1.219	720
14	1.438	3743.53	793.575	1.496	1.224	0.913	1.222	780
15	1.404	3742.04	754.582	1.463	1.222	0.9	1.197	840
16	1.413	3707.09	759.078	1.471	1.223	0.928	1.203	900
#7
1	2.666	5000.91	849.472	2.835	1.197	0.621	2.367	0	Thresh = 3083
2	2.666	5042.72	809.829	2.821	1.203	0.63	2.344	60	Area > 0.5um^2
3	2.741	5035.36	848.02	2.8	1.247	0.666	2.246	120	Tau:	742.7	s
4	2.75	5098.14	866.138	2.742	1.277	0.678	2.147	180	Fusion Length:	1.40024	um
5	2.775	5098.65	873.239	2.746	1.287	0.71	2.134	240	Tau/FusLength:	530.407	s/um
6	2.758	5159.73	834.166	2.713	1.295	0.726	2.096	300
7	2.75	5181	809.578	2.686	1.303	0.735	2.061	360
8	2.8	5158.61	828.518	2.684	1.328	0.721	2.021	420
9	2.825	5160.17	843.801	2.665	1.35	0.772	1.974	480
10	2.859	5185.24	838.365	2.64	1.379	0.759	1.914	540
11	2.834	5185.23	785.199	2.657	1.358	0.792	1.956	600
12	2.893	5155.34	832.968	2.618	1.407	0.786	1.861	660
13	2.876	5170.84	825.579	2.627	1.394	0.786	1.884	720
14	2.901	5162.32	839.949	2.593	1.424	0.788	1.821	780
15	2.901	5172.9	806.954	2.582	1.431	0.819	1.804	840
16	2.876	5202.53	760.817	2.545	1.439	0.83	1.769	900
#8
1	2.001	3996.25	1032.52	2.252	1.131	0.753	1.99	0	Thresh = 2454
2	1.976	4076.69	1055.23	2.153	1.169	0.778	1.842	60	Area > 0.5um^2
3	2.001	4119.94	1036.94	2.123	1.2	0.782	1.768	120	Tau:	753.2	s
4	2.077	4160.94	1010.25	2.15	1.23	0.818	1.747	180	Fusion Length:	1.12599	um
5	2.127	4218.95	989.464	2.148	1.261	0.838	1.703	240	Tau/FusLength:	668.923	s/um
6	2.17	4259.6	987.07	2.133	1.295	0.823	1.647	300
7	2.22	4237.28	976.228	2.147	1.316	0.858	1.631	360
8	2.186	4246.92	954.091	2.099	1.326	0.829	1.583	420
9	2.254	4314.41	913.595	2.108	1.361	0.871	1.549	480
10	2.228	4143.18	834.136	2.085	1.361	0.845	1.532	540
11	2.279	4403.91	927.522	2.072	1.4	0.888	1.48	600
12	2.287	4353.34	896.676	2.072	1.405	0.861	1.474	660
13	2.38	4341.51	889.953	2.093	1.448	0.903	1.445	720
14	2.338	4384.74	907.535	2.03	1.466	0.911	1.385	780
15	2.405	4428.65	915.503	2.039	1.501	0.912	1.358	840
16	2.397	4353.95	931.435	2.02	1.511	0.902	1.337	900
#9
1	1.917	4906.48	869.598	2.052	1.19	0.797	1.725	0	Thresh = 3085
2	1.942	4983.16	874.806	2.032	1.217	0.824	1.67	60	Area > 0.5um^2
3	2.027	5022.85	913.405	1.977	1.305	0.86	1.515	120	Tau:	420.3	s
4	2.043	5091.21	895.35	1.964	1.325	0.867	1.483	180	Fusion Length:	1.01281	um
5	2.035	5126.3	878.495	1.918	1.351	0.888	1.42	240	Tau/FusLength:	414.985	s/um
6	2.094	5117.65	921.452	1.93	1.381	0.888	1.397	300
7	2.111	5130.3	917.544	1.923	1.397	0.895	1.377	360
8	2.102	4927.64	827.836	1.89	1.416	0.917	1.335	420
9	2.195	5157.66	927.519	1.928	1.449	0.906	1.331	480
10	2.228	5108.26	883.438	1.897	1.496	0.927	1.268	540
11	2.254	5104.87	895.826	1.896	1.513	0.937	1.253	600
12	2.237	5116.93	887.342	1.871	1.522	0.923	1.229	660
13	2.237	5211.68	882.485	1.86	1.531	0.93	1.215	720
14	2.279	5148.94	896.263	1.852	1.567	0.948	1.182	780
15	2.287	5075.47	865.527	1.853	1.571	0.926	1.179	840
16	2.287	5135.47	848.403	1.831	1.591	0.944	1.151	900
#10
1	2.598	4979.26	1229.41	2.608	1.268	0.624	2.056	0	Thresh = 2820
2	2.817	5182.69	1136.25	2.753	1.303	0.67	2.113	60	Area > 0.5um^2
3	2.817	5195.7	1117.06	2.699	1.329	0.695	2.03	120	Tau:	1050	s
4	2.725	5211.6	1120.84	2.644	1.312	0.708	2.016	180	Fusion Length:	1.3035	um
5	2.64	5204.23	1129.09	2.541	1.323	0.74	1.92	240	Tau/FusLength:	805.522	s/um
6	2.64	5181.63	1126.12	2.506	1.341	0.728	1.869	300
7	2.708	5243.58	1135.41	2.519	1.368	0.777	1.841	360
8	2.716	5295.56	1129.1	2.51	1.378	0.767	1.821	420
9	2.741	5358.57	1096.76	2.521	1.385	0.805	1.821	480
10	2.775	5310.84	1110.81	2.501	1.413	0.749	1.771	540
11	2.842	5345.8	1146.83	2.521	1.436	0.821	1.756	600
12	2.733	5114.29	988.527	2.466	1.411	0.815	1.748	660
13	2.792	5383.58	1125.13	2.458	1.446	0.819	1.7	720
14	2.834	5391.52	1146.39	2.464	1.464	0.826	1.682	780
15	2.783	5345.73	1135.25	2.421	1.464	0.831	1.654	840
16	2.741	5365.42	1098.31	2.38	1.467	0.852	1.622	900
#11
1	1.228	3834.89	652.564	1.513	1.033	0.835	1.465	0	Thresh = 2457
2	1.371	4037.23	733.117	1.555	1.122	0.849	1.386	60	Area > 0.5um^2
3	1.421	4054.68	789.974	1.518	1.192	0.851	1.274	120	Tau:	259.2	s
4	1.396	4096.9	778.02	1.501	1.184	0.908	1.268	180	Fusion Length:	0.704159	um
5	1.404	4187.27	797.694	1.513	1.182	0.9	1.28	240	Tau/FusLength:	368.099	s/um
6	1.396	4213.35	760.576	1.51	1.177	0.94	1.284	300
7	1.455	4140.91	832.365	1.499	1.236	0.923	1.213	360
8	1.421	4189.53	781.542	1.465	1.235	0.957	1.187	420
9	1.438	4240.9	819.308	1.461	1.253	0.944	1.166	480
10	1.43	4234.9	793.217	1.443	1.261	0.962	1.144	540
11	1.438	4228.05	791.673	1.466	1.249	0.913	1.174	600
12	1.421	4175.49	765.467	1.441	1.255	0.957	1.148	660
13	1.463	4230.93	824.836	1.469	1.268	0.961	1.159	720
14	1.463	4198.71	819.484	1.469	1.268	0.961	1.158	780
15	1.396	3938.95	691.465	1.44	1.234	0.94	1.167	840
16	1.455	4229.7	789.042	1.426	1.298	0.99	1.099	900
