# Supplementary material for: Condensation of LINE-1 is critical for retrotransposition
Source: eLife journal article supplement (doi:10.7554/elife.82991), 2023-04-28
Supplement: supp [file StammerAEA_RNA_ORF1dropletFusionAnalysis.xlsx]

## Sheet: StamAEAprotOnly
#1	Area	Mean Int	StDev Int	Major Axis	Minor Axis	Circ	AR	Time (s)	Thresh = 1344
1	1.32	2465.36	622.529	1.828	0.92	0.693	1.988	0	Area > 0.5um^2
2	1.27	2577.18	591.372	1.6	1.01	0.877	1.584	60	Tau:	102.5	s
3	1.228	2639.75	576.404	1.505	1.039	0.911	1.449	120	Fusion Length:	0.91398	um
4	1.102	2364.47	487.735	1.385	1.013	0.886	1.367	180
5	1.228	2684.66	645.239	1.461	1.07	0.936	1.365	240
6	1.261	2652.53	645.273	1.422	1.129	0.936	1.259	300
7	1.261	2663.59	643.444	1.432	1.122	0.936	1.276	360
8	1.253	2695.05	651.182	1.417	1.125	0.906	1.259	420
9	1.253	2681.26	663.046	1.41	1.131	0.955	1.246	480
10	1.253	2684.93	636.785	1.398	1.141	0.965	1.225	540
11	1.245	2711.39	645.015	1.409	1.125	0.948	1.252	600
12	1.278	2664.86	665.946	1.417	1.149	0.915	1.233	660
13	1.228	2610.55	592.52	1.361	1.148	0.936	1.186	720
14	1.219	2740.61	626.098	1.375	1.129	0.905	1.217	780
15	1.236	2756.23	671.508	1.375	1.145	0.942	1.201	840
16	1.228	2716.89	660.615	1.379	1.134	0.911	1.216	900
#2
1	1.774	2972.64	483.082	1.81	1.248	0.9	1.45	0	Thresh = 1892
2	1.9	3098.19	467.784	1.637	1.478	0.927	1.108	60	Area > 0.5um^2
3	1.968	3137.19	466.054	1.599	1.566	0.968	1.021	120	Tau:	33.02	s
4	2.018	3118.37	470.005	1.619	1.587	0.944	1.021	180	Fusion Length:	0.837482	um
5	2.001	3100.47	447.644	1.601	1.592	0.936	1.006	240	Tau/FusLength:	39.4277	s/um
6	2.01	3097.97	466.327	1.624	1.576	0.94	1.03	300
7	2.027	3112.79	446.49	1.64	1.573	0.948	1.043	360
8	2.069	3091.24	495.104	1.649	1.598	0.94	1.032	420
9	2.052	3098.21	467.311	1.651	1.582	0.96	1.043	480
10	2.052	3097.6	469.019	1.645	1.588	0.98	1.036	540
11	2.035	3094.36	453.727	1.634	1.585	0.952	1.031	600
12	2.043	3126.69	450.984	1.643	1.583	0.956	1.038	660
13	2.085	3091.18	491.266	1.642	1.617	0.947	1.015	720
14	2.069	3081.61	479.695	1.681	1.567	0.967	1.072	780
15	2.018	3084.69	461.373	1.63	1.576	0.944	1.035	840
16	2.001	3016.05	463.998	1.614	1.579	0.956	1.023	900
#1
1	1.783	3608.63	1238.81	1.746	1.3	0.859	1.344	0	Thresh = 2016
2	1.749	3643.34	1202.63	1.581	1.408	0.906	1.123	60	Area > 0.5um^2
3	1.715	3635.79	1178.98	1.529	1.428	0.968	1.071	120	Tau:	48.46	s
4	1.699	3674.55	1167.22	1.512	1.43	0.95	1.057	180	Fusion Length:	0.761446	um
5	1.715	3661.01	1149.49	1.522	1.435	0.929	1.061	240	Tau/FusLength:	63.6421	s/um
6	1.757	3613.46	1125.92	1.531	1.462	0.94	1.047	300
7	1.741	3595.11	1067.16	1.52	1.458	0.952	1.043	360
8	1.724	3607.01	1069.87	1.513	1.451	0.942	1.043	420
9	1.774	3556.4	1076.74	1.546	1.461	0.961	1.059	480
10	1.791	3545.97	1049.56	1.549	1.472	0.97	1.053	540
11	1.791	3441.36	1024.34	1.54	1.481	0.949	1.04	600
12	1.766	3549.56	1012.34	1.522	1.477	0.965	1.03	660
13	1.774	3510.13	1006.58	1.525	1.482	0.97	1.029	720
14	1.766	3537.86	986.875	1.522	1.477	0.944	1.031	780
15	1.791	3519.54	1015.35	1.52	1.5	0.949	1.013	840
16	1.808	3483.8	1024.46	1.554	1.482	0.949	1.049	900
#2
1	1.791	1755.93	392.947	1.816	1.256	0.838	1.446	0	Thresh = 1030
2	2.094	1857.31	385.151	1.691	1.577	0.951	1.073	60	Area > 0.5um^2
3	2.237	1873.19	387.736	1.73	1.647	0.949	1.05	120	Tau:	24.34	s
4	2.329	1878.5	372.775	1.733	1.712	0.925	1.012	180	Fusion Length:	0.838666	um
5	2.363	1880.06	359.015	1.766	1.704	0.938	1.036	240	Tau/FusLength:	29.0223	s/um
6	2.455	1890.63	359.514	1.778	1.758	0.949	1.012	300
7	2.497	1896.44	364.592	1.807	1.76	0.923	1.026	360
8	2.556	1879.5	355.469	1.819	1.789	0.952	1.017	420
9	2.632	1877.25	348.095	1.838	1.823	0.955	1.008	480
10	2.725	1870.49	345.835	1.914	1.812	0.93	1.056	540
11	2.758	1882.74	324.444	1.897	1.851	0.918	1.025	600
12	2.842	1884.51	335.447	1.963	1.843	0.946	1.065	660
13	2.851	1890.9	333.58	1.971	1.842	0.956	1.07	720
14	2.935	1882.36	342.07	1.97	1.897	0.914	1.039	780
15	2.968	1883.83	343.605	2.016	1.875	0.947	1.075	840
16	2.952	1883.53	342.389	1.997	1.882	0.926	1.061	900
#3
1	1.177	2178.79	489.22	1.41	1.063	0.957	1.326	0	Thresh = 1211
2	1.177	2226.66	520.145	1.264	1.186	0.968	1.065	60	Area > 0.5um^2
3	1.194	2217.2	514.201	1.245	1.221	0.971	1.02	120	Tau:	25.68	s
4	1.202	2213.61	531.628	1.271	1.205	0.952	1.054	180	Fusion Length:	0.607339	um
5	1.177	2207.85	501.885	1.266	1.184	0.957	1.069	240	Tau/FusLength:	42.2828	s/um
6	1.194	2208.32	508.144	1.247	1.219	0.934	1.023	300
7	1.228	2183.53	524.349	1.274	1.227	0.936	1.038	360
8	1.211	2202.22	511.545	1.25	1.233	0.948	1.014	420
9	1.245	2185.25	519.302	1.286	1.232	0.974	1.044	480
10	1.228	2178.93	508.211	1.265	1.236	0.961	1.023	540
11	1.194	2203.73	487.736	1.247	1.219	0.945	1.023	600
12	1.228	2191.66	508.119	1.263	1.238	0.936	1.02	660
13	1.194	2200.8	482.35	1.242	1.224	1	1.015	720
14	1.219	2187.75	493.076	1.278	1.215	0.991	1.051	780
15	1.211	2173.15	457.861	1.262	1.222	0.958	1.032	840
16	1.228	2155.48	479.409	1.283	1.219	0.998	1.053	900

## Sheet: StamAEA1to10000RNA
#1	Area	Mean Int	StDev Int	Major Axis	Minor Axis	Circ	AR	Time (s)	Thresh = 577
1	1.236	945.531	202.329	1.801	0.874	0.748	2.06	0	Area > 0.5um^2
2	1.245	1010.49	225.782	1.686	0.94	0.847	1.793	60	Tau:	165.9	s
3	1.261	994.76	221.508	1.63	0.985	0.849	1.655	120	Fusion Length:	0.90011	um
4	1.253	1001.69	209.591	1.549	1.03	0.897	1.503	180	Tau/FusLength:	184.311	s/um
5	1.245	1008.02	215.344	1.542	1.028	0.868	1.5	240
6	1.219	1006.79	208.038	1.486	1.045	0.939	1.423	300
7	1.236	1003.54	208.7	1.535	1.025	0.885	1.498	360
8	1.236	996.884	209.449	1.511	1.042	0.918	1.45	420
9	1.261	998.573	208.254	1.465	1.096	0.903	1.336	480
10	1.253	975.604	199.923	1.447	1.103	0.92	1.312	540
11	1.236	982.993	198.561	1.444	1.09	0.942	1.324	600
12	1.261	978.727	193.921	1.441	1.114	0.912	1.293	660
13	1.228	980.493	192.83	1.445	1.082	0.972	1.336	720
14	1.219	983.814	190.683	1.427	1.088	0.939	1.311	780
15	1.236	963.415	189.865	1.443	1.091	0.978	1.323	840
16	1.219	947.31	177.581	1.425	1.09	0.939	1.307	900
#2
1	2.077	1103.84	284.493	2.47	1.071	0.656	2.307	0	Thresh = 700
2	2.161	1106.72	276.616	2.421	1.136	0.714	2.131	60	Area > 0.5um^2
3	2.17	1118.29	259.864	2.368	1.167	0.756	2.03	120	Tau:	467.2	s
4	2.186	1125.82	261.774	2.351	1.184	0.767	1.985	180	Fusion Length:	1.22406	um
5	2.195	1151.37	270.009	2.296	1.217	0.805	1.887	240	Tau/FusLength:	381.68	s/um
6	2.17	1155.91	268.138	2.254	1.226	0.841	1.839	300
7	2.245	1179.69	283.337	2.24	1.276	0.839	1.756	360
8	2.296	1212.54	306.808	2.188	1.336	0.857	1.638	420
9	2.422	1257.85	308.899	2.234	1.38	0.85	1.619	480
10	2.422	1288.85	314.503	2.208	1.396	0.835	1.581	540
11	2.455	1282.35	307.558	2.181	1.434	0.862	1.521	600
12	2.497	1311.93	323.459	2.165	1.469	0.861	1.474	660
13	2.489	1296.18	316.6	2.156	1.47	0.896	1.467	720
14	2.489	1306.38	308.912	2.141	1.48	0.92	1.447	780
15	2.531	1288.67	309.162	2.162	1.491	0.895	1.45	840
16	2.54	1307.66	312.383	2.142	1.509	0.914	1.42	900
#3
1	1.379	766.957	280.351	1.917	0.916	0.673	2.093	0	Thresh = 471
2	1.505	777.313	268.58	1.949	0.984	0.713	1.981	60	Area > 0.5um^2
3	1.455	775.416	258.418	1.838	1.008	0.695	1.823	120	Tau:	330.7	s
4	1.438	785.795	255.139	1.765	1.037	0.804	1.702	180	Fusion Length:	0.957557	um
5	1.421	779.462	242.191	1.75	1.034	0.795	1.693	240	Tau/FusLength:	345.358	s/um
6	1.413	791.423	248.031	1.676	1.073	0.808	1.561	300
7	1.396	796.084	252.506	1.638	1.085	0.845	1.51	360
8	1.413	797.345	254.454	1.653	1.088	0.875	1.519	420
9	1.371	794.552	247.149	1.558	1.12	0.879	1.391	480
10	1.413	801.101	239.145	1.576	1.141	0.875	1.381	540
11	1.404	803.533	239.141	1.575	1.135	0.891	1.387	600
12	1.48	801.295	233.922	1.61	1.17	0.866	1.376	660
13	1.455	802.85	241.946	1.561	1.187	0.923	1.316	720
14	1.413	824.149	243.393	1.515	1.187	0.897	1.277	780
15	1.396	821.223	239.445	1.522	1.168	0.865	1.303	840
16	1.396	820.627	240.603	1.516	1.172	0.974	1.293	900
#4
1	1.219	1077.88	199.411	1.652	0.94	0.809	1.757	0	Thresh = 724
2	1.261	1108.39	200.577	1.645	0.976	0.828	1.686	60	Area > 0.5um^2
3	1.287	1112.69	193.959	1.606	1.02	0.875	1.574	120	Tau:	329.3	s
4	1.278	1115.96	182.891	1.573	1.035	0.892	1.52	180	Fusion Length:	0.818095	um
5	1.303	1121.53	185.174	1.569	1.058	0.887	1.483	240	Tau/FusLength:	402.52	s/um
6	1.303	1125.44	181.433	1.548	1.072	0.878	1.444	300
7	1.345	1125.62	184.331	1.553	1.103	0.939	1.408	360
8	1.337	1119.18	172.612	1.534	1.11	0.933	1.382	420
9	1.337	1089.24	168.653	1.534	1.11	0.933	1.382	480
10	1.387	1116.75	183.148	1.531	1.154	0.934	1.327	540
11	1.371	1089.48	175.265	1.514	1.152	0.923	1.314	600
12	1.371	1097.46	174.843	1.517	1.15	0.923	1.319	660
13	1.337	1107.95	167.33	1.462	1.164	0.91	1.255	720
14	1.354	1081.18	166.406	1.471	1.172	0.935	1.255	780
15	1.362	1088.17	169.474	1.492	1.163	0.94	1.283	840
16	1.312	1084.68	150.745	1.459	1.145	0.892	1.275	900
#5
1	1.547	1476.8	364.507	1.919	1.027	0.83	1.869	0	Thresh = 1892
2	1.9	1780.7	439.383	1.869	1.295	0.889	1.443	60	Area > 0.5um^2
3	1.968	1814.19	468.708	1.822	1.375	0.92	1.325	120	Tau:	95.59	s
4	2.043	1856.55	470.09	1.785	1.457	0.91	1.225	180	Fusion Length:	0.957123	um
5	2.069	1868.36	469.216	1.754	1.502	0.967	1.168	240	Tau/FusLength:	99.8722	s/um
6	2.127	1856.32	477.895	1.777	1.524	0.947	1.166	300
7	2.102	1886.2	460.562	1.731	1.546	0.963	1.12	360
8	2.119	1864.47	449.071	1.74	1.551	0.943	1.122	420
9	2.136	1882.77	458.194	1.733	1.57	0.943	1.104	480
10	2.144	1890.84	442.823	1.737	1.572	0.955	1.105	540
11	2.195	1893.51	464.128	1.745	1.602	0.95	1.089	600
12	2.212	1891.94	465.619	1.753	1.607	0.938	1.091	660
13	2.178	1897.53	436.675	1.743	1.591	0.924	1.096	720
14	2.228	1898.49	441.026	1.743	1.628	0.945	1.071	780
15	2.237	1873.83	444.306	1.764	1.614	0.949	1.093	840
16	2.254	1921.27	438.559	1.744	1.645	0.956	1.06	900
#6
1	3.439	2952.76	592.264	2.872	1.525	0.774	1.883	0	Thresh = 1892
2	3.523	3009.1	580.459	2.769	1.62	0.809	1.71	60	Area > 0.5um^2
3	3.574	3027.11	561.742	2.726	1.669	0.838	1.634	120	Tau:	282	s
4	3.591	3048.15	550.822	2.672	1.711	0.854	1.562	180	Fusion Length:	1.43324	um
5	3.582	3044.11	549.274	2.607	1.749	0.865	1.49	240	Tau/FusLength:	196.757	s/um
6	3.616	3055.87	549.86	2.566	1.794	0.879	1.43	300
7	3.616	3061.54	535.095	2.56	1.798	0.892	1.423	360
8	3.624	3063.91	548.537	2.531	1.823	0.888	1.389	420
9	3.633	3055.26	538.325	2.507	1.845	0.89	1.359	480
10	3.658	3045.71	530.13	2.483	1.876	0.897	1.324	540
11	3.633	3076.77	524.228	2.457	1.883	0.91	1.305	600
12	3.666	3033.26	523.214	2.453	1.903	0.918	1.289	660
13	3.658	3051.26	511.349	2.439	1.909	0.936	1.278	720
14	3.641	3054.13	511.273	2.428	1.909	0.932	1.272	780
15	3.692	3033.2	516.585	2.422	1.94	0.93	1.248	840
16	3.666	3028.83	509.368	2.41	1.937	0.938	1.244	900
#7
1	2.161	2696.12	588.698	2.496	1.102	0.64	2.265	0	Thresh = 1892
2	2.161	2757.98	578.359	2.364	1.164	0.743	2.03	60	Area > 0.5um^2
3	2.136	2801.72	578.161	2.227	1.221	0.801	1.824	120	Tau:	223.2	s
4	2.094	2834.7	552.018	2.151	1.24	0.822	1.735	180	Fusion Length:	1.23943	um
5	2.085	2828.09	547.551	2.094	1.268	0.819	1.652	240	Tau/FusLength:	180.083	s/um
6	2.094	2814.62	567.966	2.074	1.285	0.854	1.614	300
7	2.102	2787.19	560.93	2.033	1.317	0.882	1.543	360
8	2.052	2809.4	556.644	1.981	1.319	0.877	1.502	420
9	2.077	2802.95	564.666	1.966	1.345	0.888	1.462	480
10	2.077	2791.76	570.552	1.947	1.358	0.888	1.434	540
11	2.069	2784.91	570.03	1.932	1.363	0.921	1.418	600
12	2.043	2792.7	546.705	1.898	1.371	0.917	1.385	660
13	2.035	2793.12	538.894	1.879	1.379	0.913	1.362	720
14	2.06	2802.97	552.775	1.899	1.382	0.925	1.374	780
15	2.052	2747.74	559.279	1.897	1.377	0.921	1.378	840
16	2.043	2762.78	544.276	1.872	1.39	0.936	1.347	900
#8
1	1.337	1997.5	479.423	1.667	1.021	0.887	1.632	0	Thresh = 1892
2	1.354	2050.23	521.825	1.565	1.101	0.921	1.422	60	Area > 0.5um^2
3	1.345	2087.89	517.093	1.488	1.151	0.906	1.293	120	Tau:	130.1	s
4	1.345	2110.47	527.753	1.458	1.175	0.939	1.24	180	Fusion Length:	0.812137	um
5	1.32	2121.04	494.499	1.4	1.201	0.98	1.166	240	Tau/FusLength:	160.195	s/um
6	1.295	2108.6	468.56	1.353	1.219	0.961	1.11	300
7	1.337	2077.38	474.7	1.386	1.229	0.992	1.128	360
8	1.337	2064.87	469.34	1.392	1.223	0.957	1.138	420
9	1.32	2073.64	450.506	1.336	1.258	0.955	1.063	480
10	1.345	2055.07	453.582	1.388	1.234	0.948	1.125	540
11	1.329	2067.42	447.887	1.383	1.223	0.961	1.131	600
12	1.329	2070.67	446.588	1.376	1.23	0.951	1.119	660
13	1.337	2076.41	441.27	1.353	1.258	0.933	1.076	720
14	1.329	2021.75	433.06	1.343	1.26	0.927	1.066	780
15	1.295	2050.68	425.635	1.329	1.241	0.972	1.07	840
16	1.345	2011.57	442.856	1.342	1.276	0.915	1.051	900
#9
1	1.808	2143.77	454.588	1.947	1.182	0.828	1.647	0	Thresh = 1892
2	1.808	2243.85	497.454	1.764	1.305	0.897	1.351	60	Area > 0.5um^2
3	1.783	2288.84	521.715	1.657	1.369	0.944	1.21	120	Tau:	83.91	s
4	1.791	2300.53	532.203	1.607	1.419	0.94	1.132	180	Fusion Length:	0.95091	um
5	1.833	2316.54	559.698	1.591	1.467	0.95	1.085	240	Tau/FusLength:	88.2418	s/um
6	1.833	2324.01	533.784	1.589	1.469	0.913	1.082	300
7	1.875	2321.79	535.396	1.591	1.501	0.963	1.06	360
8	1.959	2311.02	535.742	1.638	1.523	0.985	1.076	420
9	1.993	2348.3	534.983	1.651	1.537	0.96	1.074	480
10	2.069	2340.56	538.723	1.676	1.571	0.948	1.067	540
11	2.136	2329.76	544.641	1.711	1.589	0.951	1.077	600
12	2.161	2356.11	546.203	1.704	1.615	0.962	1.056	660
13	2.178	2340.93	519.744	1.727	1.606	0.95	1.075	720
14	2.186	2360.53	510.025	1.711	1.627	0.973	1.052	780
15	2.296	2362.53	555.857	1.762	1.659	0.929	1.063	840
16	2.262	2392.97	512.296	1.752	1.644	0.933	1.066	900
#10
1	3.17	3240.8	754.825	2.593	1.557	0.799	1.666	0	Thresh = 1892
2	3.229	3430.86	969.611	2.532	1.624	0.831	1.56	60	Area > 0.5um^2
3	3.246	3500.51	1049.85	2.482	1.665	0.854	1.491	120	Tau:	322.4	s
4	3.288	3553.5	1138.08	2.459	1.703	0.873	1.444	180	Fusion Length:	1.27006	um
5	3.288	3626.17	1196.78	2.416	1.733	0.873	1.394	240	Tau/FusLength:	253.846	s/um
6	3.313	3638.03	1222.02	2.379	1.773	0.9	1.342	300
7	3.322	3663.38	1222.54	2.342	1.806	0.902	1.297	360
8	3.313	3642.05	1199.34	2.306	1.829	0.894	1.26	420
9	3.296	3667.14	1192.37	2.279	1.841	0.93	1.238	480
10	3.364	3661.74	1218.84	2.311	1.854	0.913	1.247	540
11	3.389	3634.03	1224.96	2.297	1.878	0.9	1.223	600
12	3.372	3659.26	1186.76	2.28	1.883	0.916	1.21	660
13	3.372	3640.44	1152.52	2.255	1.904	0.93	1.185	720
14	3.414	3614.06	1141.98	2.265	1.919	0.942	1.18	780
15	3.38	3581.19	1104.31	2.235	1.925	0.948	1.161	840
16	3.406	3594.86	1104.14	2.247	1.929	0.94	1.165	900
#11
1	2.8	2691.8	531.694	2.709	1.316	0.721	2.058	0	Thresh = 1892
2	3.17	2852.21	573.917	2.659	1.518	0.816	1.752	60	Area > 0.5um^2
3	3.204	2897.17	581.521	2.562	1.592	0.876	1.609	120	Tau:	232.6	s
4	3.246	2902.94	568.673	2.534	1.631	0.854	1.554	180	Fusion Length:	1.35395	um
5	3.288	2891.16	567.894	2.458	1.703	0.899	1.444	240	Tau/FusLength:	171.793	s/um
6	3.313	2886.64	556.718	2.441	1.728	0.92	1.413	300
7	3.313	2881.47	543.326	2.421	1.743	0.92	1.389	360
8	3.355	2880.98	556.351	2.373	1.8	0.926	1.319	420
9	3.338	2898.91	532.292	2.358	1.803	0.936	1.308	480
10	3.38	2870.01	539.02	2.33	1.848	0.918	1.261	540
11	3.38	2877.09	535.437	2.325	1.851	0.918	1.256	600
12	3.406	2849.73	518.15	2.307	1.88	0.94	1.227	660
13	3.439	2832.78	523.701	2.32	1.888	0.934	1.229	720
14	3.448	2827.83	513.242	2.264	1.939	0.93	1.168	780
15	3.422	2845.8	495.137	2.247	1.939	0.944	1.159	840
16	3.439	2828.7	493.197	2.238	1.957	0.964	1.144	900
#12
1	2.859	2174.5	465.554	2.695	1.351	0.666	1.996	0	Thresh = 1892
2	2.935	2302.07	497.67	2.532	1.476	0.779	1.716	60	Area > 0.5um^2
3	2.91	2337.31	487.939	2.423	1.529	0.834	1.584	120	Tau:	167	s
4	2.985	2353.79	500.912	2.405	1.581	0.842	1.521	180	Fusion Length:	1.3475	um
5	2.96	2371.73	489.854	2.362	1.595	0.869	1.481	240	Tau/FusLength:	123.934	s/um
6	2.968	2393.19	491.607	2.324	1.626	0.886	1.429	300
7	2.977	2380.59	482.932	2.31	1.641	0.888	1.408	360
8	2.968	2392.41	482.629	2.298	1.645	0.886	1.397	420
9	2.977	2379.15	469.587	2.277	1.664	0.925	1.368	480
10	3.036	2391.49	490.51	2.271	1.702	0.906	1.334	540
11	3.036	2390.17	482.435	2.245	1.721	0.906	1.304	600
12	3.052	2392.35	488.269	2.255	1.724	0.926	1.308	660
13	3.044	2386.09	479.974	2.25	1.723	0.917	1.306	720
14	3.069	2379.58	494.044	2.255	1.733	0.91	1.301	780
15	3.095	2383.52	494.374	2.262	1.742	0.917	1.298	840
16	3.069	2402.89	476.193	2.238	1.746	0.931	1.282	900
#13
1	1.892	2915.72	541.037	2.009	1.199	0.825	1.675	0	Thresh = 1892
2	1.884	2936.48	548.463	1.931	1.242	0.856	1.554	60	Area > 0.5um^2
3	1.909	2920.03	573.488	1.919	1.267	0.885	1.515	120	Tau:	246.1	s
4	1.842	2953.08	523.354	1.825	1.285	0.898	1.421	180	Fusion Length:	0.98549	um
5	1.892	2951.63	558.811	1.821	1.323	0.904	1.376	240	Tau/FusLength:	249.724	s/um
6	1.884	2981.38	565.987	1.798	1.334	0.919	1.348	300
7	1.9	2986.88	561.801	1.788	1.353	0.927	1.321	360
8	1.909	2947.76	580.611	1.783	1.363	0.912	1.308	420
9	1.875	3004.66	560.361	1.748	1.366	0.923	1.28	480
10	1.884	2997.94	577.712	1.741	1.378	0.947	1.263	540
11	1.85	3018.12	552.241	1.725	1.366	0.91	1.263	600
12	1.842	3014.91	540.04	1.71	1.371	0.898	1.247	660
13	1.858	2969.75	547.8	1.717	1.378	0.934	1.245	720
14	1.867	2946.93	548.988	1.714	1.387	0.959	1.236	780
15	1.833	2966.37	528.383	1.693	1.379	0.93	1.228	840
16	1.892	2963.85	540.812	1.709	1.41	0.951	1.212	900
#14
1	1.8	2208.33	539.42	1.936	1.184	0.808	1.635	0	Thresh = 1892
2	1.808	2263.1	550.283	1.891	1.217	0.821	1.554	60	Area > 0.5um^2
3	1.808	2278.69	515.728	1.855	1.241	0.889	1.494	120	Tau:	278.9	s
4	1.85	2254.75	509.635	1.839	1.281	0.883	1.436	180	Fusion Length:	0.943593	um
5	1.858	2236.29	511.744	1.827	1.295	0.887	1.411	240	Tau/FusLength:	295.572	s/um
6	1.825	2244.01	491.34	1.817	1.279	0.917	1.421	300
7	1.9	2255.12	498.717	1.816	1.332	0.908	1.363	360
8	1.892	2265.43	478.112	1.807	1.333	0.904	1.355	420
9	1.951	2233.62	501.289	1.826	1.36	0.912	1.342	480
10	1.926	2250.19	474.93	1.795	1.366	0.928	1.314	540
11	1.934	2222.54	474.551	1.793	1.374	0.905	1.305	600
12	1.942	2222.15	469.853	1.816	1.362	0.908	1.334	660
13	1.926	2214.87	452.233	1.773	1.383	0.947	1.282	720
14	1.934	2210.98	459.934	1.783	1.382	0.932	1.29	780
15	1.926	2210.44	458.914	1.773	1.383	0.928	1.282	840
16	1.909	2209.06	444.371	1.762	1.379	0.939	1.277	900
#15
1	2.195	2096.12	518.202	2.393	1.168	0.635	2.049	0	Thresh = 1171
2	2.228	2181.82	505.045	2.302	1.233	0.76	1.867	60	Area > 0.5um^2
3	2.195	2217.92	487.795	2.225	1.256	0.776	1.772	120	Tau:	272.1	s
4	2.279	2196.62	496.714	2.215	1.31	0.806	1.691	180	Fusion Length:	1.19616	um
5	2.287	2187.94	486.902	2.18	1.336	0.845	1.632	240	Tau/FusLength:	227.478	s/um
6	2.304	2201.5	493.92	2.157	1.36	0.851	1.586	300
7	2.321	2186.04	483.528	2.162	1.367	0.836	1.582	360
8	2.329	2184.4	472.163	2.132	1.391	0.845	1.533	420
9	2.329	2186.45	460.506	2.118	1.4	0.861	1.513	480
10	2.321	2195.32	451.258	2.101	1.406	0.874	1.494	540
11	2.321	2187.35	449.106	2.094	1.411	0.88	1.484	600
12	2.363	2157.92	460.352	2.088	1.441	0.873	1.449	660
13	2.329	2169.86	436.319	2.061	1.439	0.877	1.432	720
14	2.346	2170.44	429.907	2.067	1.445	0.89	1.43	780
15	2.371	2146.7	445.905	2.037	1.482	0.893	1.375	840
16	2.355	2157.21	438.308	2.036	1.472	0.893	1.383	900
#16
1	1.892	2602.22	608.146	2.029	1.187	0.76	1.708	0	Thresh = 1434
2	1.942	2715.08	620.508	1.976	1.251	0.808	1.579	60	Area > 0.5um^2
3	1.976	2746.95	618.601	1.97	1.277	0.862	1.542	120	Tau:	290.7	s
4	1.976	2746.71	612.097	1.908	1.319	0.869	1.447	180	Fusion Length:	0.999727	um
5	1.951	2788.17	611.473	1.841	1.349	0.92	1.365	240	Tau/FusLength:	290.779	s/um
6	1.976	2773.23	623.284	1.868	1.347	0.905	1.387	300
7	1.985	2794.44	608.51	1.857	1.36	0.928	1.365	360
8	1.959	2800.14	601.812	1.794	1.39	0.924	1.29	420
9	1.993	2818.29	610.312	1.801	1.409	0.932	1.279	480
10	1.959	2862.58	577.102	1.772	1.408	0.932	1.259	540
11	2.001	2806.82	592.736	1.78	1.431	0.917	1.244	600
12	2.001	2807.53	593.965	1.775	1.436	0.936	1.236	660
13	1.993	2829.4	603.828	1.754	1.447	0.932	1.212	720
14	2.01	2808.78	607.49	1.776	1.44	0.94	1.233	780
15	2.01	2821.06	608.646	1.75	1.462	0.94	1.197	840
16	2.018	2809.51	604.977	1.756	1.464	0.944	1.199	900

## Sheet: StamAEA1to3000RNA
#1	Area	Mean Int	StDev Int	Major Axis	Minor Axis	Circ	AR	Time (s)	Thresh = 595
1	3.305	888.453	168.93	3.164	1.33	0.591	2.379	0	Area > 0.5um^2
2	3.49	927.795	165.674	2.998	1.482	0.739	2.022	60	Tau:	168.4	s
3	3.507	959.269	171.354	2.872	1.555	0.769	1.847	120	Fusion Length:	1.5618	um
4	3.557	966.742	178.159	2.771	1.634	0.807	1.696	180	Tau/FusLength:	107.824	s/um
5	3.532	965.386	172.739	2.687	1.674	0.848	1.605	240
6	3.532	963.081	165.282	2.608	1.724	0.892	1.513	300
7	3.549	955.635	162.785	2.598	1.739	0.883	1.494	360
8	3.565	961.052	166.978	2.554	1.778	0.887	1.437	420
9	3.557	954.128	165.815	2.528	1.791	0.885	1.411	480
10	3.338	940.715	148.632	2.453	1.733	0.862	1.416	540
11	3.49	969.969	161.713	2.503	1.775	0.887	1.41	600
12	3.54	960.259	161.282	2.478	1.819	0.894	1.362	660
13	3.532	956.412	155.51	2.477	1.815	0.879	1.365	720
14	3.591	957.564	160.07	2.478	1.845	0.888	1.343	780
15	3.481	966.135	148.994	2.467	1.797	0.899	1.373	840
16	3.507	967.329	148.138	2.431	1.837	0.925	1.323	900
#2
1	2.22	1344.42	218.173	2.256	1.253	0.777	1.801	0	Thresh = 869
2	2.312	1353.36	226.104	2.148	1.371	0.845	1.566	60	Area > 0.5um^2
3	2.287	1370.67	223.831	2.086	1.396	0.852	1.495	120	Tau:	254.9	s
4	2.254	1368.66	217.107	2.041	1.406	0.878	1.451	180	Fusion Length:	1.12105	um
5	2.262	1370.35	218.529	2.01	1.433	0.898	1.402	240	Tau/FusLength:	227.376	s/um
6	2.279	1375.55	218.693	1.971	1.472	0.881	1.339	300
7	2.22	1388.13	213.601	1.942	1.455	0.916	1.335	360
8	2.254	1369.8	218.556	1.917	1.497	0.905	1.28	420
9	2.17	1332.03	202.689	1.856	1.488	0.761	1.247	480
10	2.279	1352.17	222.363	1.869	1.553	0.858	1.204	540
11	2.254	1343.87	211.869	1.868	1.536	0.871	1.216	600
12	2.245	1347.48	217.646	1.864	1.534	0.83	1.215	660
13	2.237	1348.29	214.148	1.841	1.547	0.848	1.19	720
14	2.254	1329.64	207.657	1.839	1.561	0.93	1.178	780
15	2.262	1327.82	203.216	1.819	1.584	0.867	1.148	840
16	2.212	1336.9	198.572	1.811	1.555	0.839	1.164	900
#3
1	3.128	1174.04	260.042	2.772	1.437	0.58	1.929	0	Thresh = 703
2	3.246	1239.54	259.679	2.641	1.565	0.745	1.688	60	Area > 0.5um^2
3	3.28	1268.72	255.74	2.548	1.639	0.797	1.555	120	Tau:	169.5	s
4	3.305	1254.36	253.273	2.508	1.678	0.82	1.495	180	Fusion Length:	1.38506	um
5	3.338	1258.54	249.735	2.486	1.71	0.823	1.454	240	Tau/FusLength:	122.377	s/um
6	3.364	1275.23	253.445	2.456	1.744	0.861	1.408	300
7	3.322	1281.83	252.379	2.429	1.741	0.863	1.395	360
8	3.372	1284.2	253.937	2.404	1.786	0.91	1.346	420
9	3.305	1240.73	233.889	2.395	1.757	0.864	1.363	480
10	3.38	1286.5	245.138	2.395	1.797	0.892	1.332	540
11	3.422	1273.52	245.873	2.387	1.826	0.923	1.308	600
12	3.439	1275.28	241.424	2.384	1.837	0.928	1.297	660
13	3.431	1273.36	235.867	2.378	1.837	0.905	1.294	720
14	3.448	1275.26	237.79	2.385	1.841	0.916	1.295	780
15	3.473	1266.54	233.71	2.37	1.866	0.902	1.27	840
16	3.456	1264.49	234.075	2.363	1.862	0.892	1.269	900
#4
1	3.229	799.086	170.954	2.705	1.52	0.602	1.779	0	Thresh = 509
2	3.322	813.005	167.44	2.577	1.641	0.763	1.57	60	Area > 0.5um^2
3	3.28	823.254	167.118	2.484	1.681	0.809	1.478	120	Tau:	237.2	s
4	3.313	841.685	176.006	2.418	1.745	0.8	1.386	180	Fusion Length:	1.34209	um
5	3.237	845.927	170.642	2.367	1.741	0.841	1.359	240	Tau/FusLength:	176.74	s/um
6	3.212	845.361	166.359	2.287	1.788	0.829	1.279	300
7	3.221	840.948	171.323	2.216	1.851	0.883	1.197	360
8	3.002	825.857	157.619	2.147	1.781	0.911	1.206	420
9	3.069	843.986	164.318	2.092	1.868	0.931	1.12	480
10	3.036	843.086	160.517	2.07	1.867	0.921	1.109	540
11	3.069	833.268	155.99	2.114	1.848	0.895	1.144	600
12	3.044	834.58	157.097	2.083	1.861	0.902	1.119	660
13	3.027	835.469	155.999	2.049	1.881	0.918	1.09	720
14	3.052	839.072	160.155	2.043	1.902	0.864	1.074	780
15	3.027	835.669	154.814	2.062	1.87	0.94	1.103	840
16	3.01	837.567	147.86	2.04	1.879	0.913	1.086	900
#5
1	3.338	1021.73	229.252	3.135	1.356	0.582	2.313	0	Thresh = 648
2	3.347	1048.95	238.479	2.88	1.48	0.691	1.946	60	Area > 0.5um^2
3	3.12	1067.69	261.886	2.6	1.528	0.831	1.701	120	Tau:	172.7	s
4	2.901	1084.98	265.78	2.356	1.568	0.816	1.503	180	Fusion Length:	1.55317	um
5	2.767	1087.15	272.075	2.197	1.603	0.809	1.371	240	Tau/FusLength:	111.192	s/um
6	2.708	1103.69	266.576	2.109	1.635	0.924	1.29	300
7	2.556	1064.7	258.551	1.975	1.648	0.83	1.198	360
8	2.657	1076.02	257.117	2.029	1.667	0.863	1.217	420
9	2.59	1092.38	250.911	1.925	1.713	0.947	1.124	480
10	2.582	1093.66	260.951	1.913	1.718	0.897	1.114	540
11	2.548	1089.07	253.23	1.894	1.713	0.908	1.106	600
12	2.523	1078.95	243.48	1.886	1.703	0.905	1.107	660
13	2.54	1080.95	247.179	1.858	1.741	0.963	1.067	720
14	2.506	1079.07	257.39	1.844	1.731	0.916	1.065	780
15	2.497	1085.11	260.761	1.87	1.7	0.93	1.1	840
16	2.523	1091.12	276.318	1.858	1.729	0.922	1.074	900
#6
1	3.28	980.687	152.615	2.792	1.496	0.689	1.867	0	Thresh = 659
2	3.296	987.681	153.615	2.77	1.515	0.731	1.828	60	Area > 0.5um^2
3	3.305	989.883	150.48	2.701	1.558	0.786	1.734	120	Tau:	343.7	s
4	3.397	995.832	154.03	2.696	1.604	0.78	1.68	180	Fusion Length:	1.39241	um
5	3.347	993.749	147.809	2.654	1.606	0.78	1.653	240	Tau/FusLength:	246.838	s/um
6	3.397	996.475	149.034	2.648	1.633	0.813	1.621	300
7	3.465	989.692	150.837	2.65	1.664	0.807	1.592	360
8	3.431	991.99	148.506	2.622	1.666	0.828	1.574	420
9	3.422	985.521	147.24	2.601	1.675	0.826	1.552	480
10	3.448	998.171	148.65	2.594	1.693	0.803	1.532	540
11	3.49	989.634	142.439	2.605	1.706	0.861	1.527	600
12	3.515	987.572	144.322	2.604	1.719	0.831	1.515	660
13	3.473	990.056	143.263	2.58	1.714	0.821	1.505	720
14	3.465	990.41	138.452	2.575	1.713	0.86	1.503	780
15	3.515	989.986	143.839	2.563	1.746	0.824	1.468	840
16	3.549	992.237	141.011	2.562	1.764	0.832	1.453	900
#7
1	1.396	956.084	195.017	1.811	0.981	0.739	1.846	0	Thresh = 615
2	1.362	996.074	189.471	1.619	1.071	0.832	1.512	60	Area > 0.5um^2
3	1.287	1035.95	208.737	1.436	1.141	0.955	1.259	120	Tau:	102.5	s
4	1.278	1030.56	204.385	1.386	1.174	0.949	1.18	180	Fusion Length:	0.902347	um
5	1.27	1029.31	207.726	1.375	1.176	0.932	1.169	240	Tau/FusLength:	113.593	s/um
6	1.27	1018.18	198.824	1.356	1.192	0.942	1.137	300
7	1.295	1026.12	216.064	1.352	1.219	0.937	1.109	360
8	1.261	1045.09	214.129	1.311	1.225	0.903	1.07	420
9	1.303	1023.4	219.747	1.327	1.25	0.933	1.061	480
10	1.32	1042.84	228.065	1.353	1.243	0.945	1.088	540
11	1.32	1035.66	206.628	1.317	1.277	0.98	1.031	600
12	1.278	1027.94	187.115	1.305	1.247	0.974	1.047	660
13	1.303	1024.97	194.605	1.311	1.266	0.967	1.036	720
14	1.345	1022.2	201.371	1.337	1.282	0.973	1.043	780
15	1.295	995.188	184.391	1.321	1.248	0.961	1.058	840
16	1.354	1014.41	208.65	1.362	1.266	0.979	1.076	900
#8
1	2.304	1057.92	251.357	2.462	1.191	0.678	2.067	0	Thresh = 656
2	2.262	1087.89	243.298	2.34	1.231	0.758	1.902	60	Area > 0.5um^2
3	2.245	1089.39	254.439	2.234	1.28	0.791	1.746	120	Tau:	329.5	s
4	2.111	1104.75	247.192	2.112	1.272	0.829	1.66	180	Fusion Length:	1.23035	um
5	2.127	1107.78	255.009	2.069	1.31	0.845	1.58	240	Tau/FusLength:	267.81	s/um
6	2.102	1107.57	255.641	1.988	1.347	0.899	1.476	300
7	2.018	1118.3	252.762	1.9	1.352	0.898	1.406	360
8	2.027	1111.22	250.613	1.913	1.349	0.86	1.419	420
9	1.985	1131.32	253.418	1.877	1.346	0.891	1.395	480
10	2.001	1128.78	257.019	1.867	1.365	0.891	1.368	540
11	2.01	1143.28	251.795	1.806	1.417	0.921	1.275	600
12	2.018	1134.35	256.061	1.784	1.441	0.906	1.238	660
13	2.043	1140.17	259.855	1.788	1.455	0.956	1.229	720
14	2.035	1141.12	264.292	1.771	1.463	0.972	1.211	780
15	1.993	1144.02	250.146	1.758	1.443	0.932	1.218	840
16	1.985	1143.89	250.455	1.718	1.471	0.956	1.168	900
#9
1	2.287	975.316	202.282	2.225	1.309	0.769	1.699	0	Thresh = 614
2	2.22	996.428	199.414	2.138	1.322	0.829	1.617	60	Area > 0.5um^2
3	2.228	1000.55	217.217	2.04	1.391	0.855	1.466	120	Tau:	255.6	s
4	2.17	1006.37	214.129	1.96	1.409	0.871	1.39	180	Fusion Length:	1.09501	um
5	2.228	1026.24	215.787	1.979	1.433	0.919	1.381	240	Tau/FusLength:	233.423	s/um
6	2.203	1034.83	220.042	1.968	1.426	0.892	1.38	300
7	2.237	1028.91	219.147	1.949	1.461	0.905	1.334	360
8	2.237	1026.87	212.384	1.923	1.481	0.905	1.299	420
9	2.186	1036.51	212.186	1.902	1.464	0.927	1.299	480
10	2.254	1047.83	225.573	1.902	1.508	0.912	1.261	540
11	2.237	1043.21	213.737	1.88	1.515	0.93	1.24	600
12	2.237	1040.8	208.423	1.891	1.506	0.93	1.255	660
13	2.254	1043.79	222.08	1.884	1.523	0.937	1.237	720
14	2.245	1038.99	213.466	1.845	1.549	0.909	1.191	780
15	2.22	1042.13	197.876	1.852	1.526	0.923	1.214	840
16	2.245	1049.02	216.078	1.839	1.555	0.909	1.183	900
#10
1	2.783	1148.72	202.239	2.569	1.38	0.758	1.862	0	Thresh = 749
2	2.867	1161.48	208.323	2.51	1.455	0.776	1.725	60	Area > 0.5um^2
3	2.842	1163.53	199.723	2.492	1.452	0.779	1.717	120	Tau:	285	s
4	2.884	1171.2	206.406	2.447	1.501	0.835	1.631	180	Fusion Length:	1.28094	um
5	2.825	1179.05	198.563	2.401	1.498	0.832	1.603	240	Tau/FusLength:	222.492	s/um
6	2.901	1173.14	208.306	2.416	1.529	0.803	1.58	300
7	2.91	1176.21	207.194	2.375	1.56	0.856	1.522	360
8	2.876	1178.01	198.606	2.351	1.558	0.846	1.509	420
9	2.859	1170.92	196.805	2.345	1.553	0.842	1.51	480
10	2.876	1157.44	193.967	2.339	1.566	0.833	1.494	540
11	2.867	1166.76	193.622	2.329	1.568	0.85	1.486	600
12	2.91	1164.78	195.319	2.311	1.603	0.877	1.441	660
13	2.935	1162.3	196.95	2.338	1.599	0.87	1.462	720
14	2.901	1163.17	192.291	2.304	1.603	0.895	1.438	780
15	2.918	1158.81	187.317	2.322	1.6	0.845	1.452	840
16	2.884	1162.37	187.194	2.281	1.61	0.869	1.417	900
#11	Area	Mean Int	StDev Int	Major Axis	Minor Axis	Circ	AR	Time (s)	Thresh = 1428
1	2.111	2356.22	411.615	2.273	1.182	0.715	1.922	0	Area > 0.5um^2
2	2.203	2381.96	424.148	2.247	1.249	0.773	1.799	60	Tau:	345.5	s
3	2.338	2407.04	434.777	2.292	1.299	0.792	1.765	120	Fusion Length:	1.13559	um
4	2.388	2437.88	432.791	2.265	1.343	0.789	1.686	180	Tau/FusLength:	304.247	s/um
5	2.464	2425.78	423.473	2.266	1.384	0.843	1.637	240
6	2.548	2428.12	435.245	2.282	1.421	0.807	1.606	300
7	2.556	2452.84	437.772	2.269	1.435	0.83	1.581	360
8	2.548	2460.2	414.067	2.239	1.449	0.827	1.545	420
9	2.598	2471.78	415.349	2.251	1.47	0.858	1.532	480
10	2.657	2457.16	426.499	2.253	1.502	0.848	1.5	540
11	2.632	2469.54	404.502	2.228	1.504	0.861	1.481	600
12	2.691	2474.07	408.83	2.227	1.538	0.859	1.448	660
13	2.699	2462.73	394.951	2.224	1.545	0.862	1.439	720
14	2.699	2476.37	390.222	2.224	1.546	0.862	1.439	780
15	2.716	2468.6	392.421	2.221	1.557	0.867	1.426	840
16	2.75	2470.12	385.722	2.244	1.56	0.857	1.438	900
#12
1	2.901	2158.11	392.986	2.872	1.286	0.631	2.233	0	Thresh = 1360
2	3.153	2255.59	378.425	2.863	1.403	0.704	2.041	60	Area > 0.5um^2
3	3.288	2296.73	394.949	2.885	1.451	0.738	1.988	120	Tau:	340.2	s
4	3.347	2278.48	381.952	2.84	1.501	0.778	1.892	180	Fusion Length:	1.42814	um
5	3.372	2306.36	365.014	2.838	1.513	0.784	1.876	240	Tau/FusLength:	238.211	s/um
6	3.414	2300.06	377.755	2.818	1.542	0.805	1.827	300
7	3.448	2300.86	359.174	2.81	1.562	0.813	1.799	360
8	3.456	2301.44	352.062	2.788	1.579	0.803	1.766	420
9	3.49	2303.79	351.346	2.789	1.593	0.841	1.751	480
10	3.498	2287.68	349.806	2.776	1.605	0.83	1.73	540
11	3.54	2269.11	346.109	2.772	1.626	0.823	1.705	600
12	3.591	2267.07	351.49	2.759	1.657	0.835	1.664	660
13	3.515	2285.6	312.944	2.735	1.636	0.834	1.671	720
14	3.591	2270.08	323.892	2.722	1.68	0.835	1.62	780
15	3.607	2272.85	322.975	2.725	1.686	0.838	1.617	840
16	3.616	2264.25	320.789	2.703	1.703	0.871	1.587	900
#13
1	2.035	2860.55	605.458	2.049	1.265	0.801	1.62	0	Thresh = 1656
2	2.077	2915.3	586.844	2.033	1.301	0.818	1.562	60	Area > 0.5um^2
3	2.136	2937.06	579.675	2.029	1.34	0.841	1.514	120	Tau:	293	s
4	2.153	2968	570.462	2.021	1.356	0.838	1.49	180	Fusion Length:	0.995871	um
5	2.178	2951.73	569.869	1.998	1.388	0.865	1.439	240	Tau/FusLength:	294.215	s/um
6	2.203	2969.14	548.809	1.995	1.406	0.899	1.418	300
7	2.228	2970.01	531.623	2.011	1.411	0.885	1.425	360
8	2.329	2933.24	577.892	2.015	1.472	0.89	1.369	420
9	2.304	2951.25	567.068	2.002	1.465	0.874	1.367	480
10	2.338	2935.78	568.067	2.003	1.486	0.928	1.348	540
11	2.287	2982.3	533.128	1.991	1.463	0.908	1.361	600
12	2.363	2938.68	553.5	2.007	1.499	0.913	1.338	660
13	2.287	2986.62	505.61	1.974	1.475	0.884	1.338	720
14	2.321	2975.71	512.637	1.981	1.491	0.921	1.328	780
15	2.388	2938.39	520.012	2.015	1.509	0.923	1.335	840
16	2.355	2957.03	497.272	1.994	1.504	0.9	1.326	900
#14
1	1.715	1608.8	312.673	1.996	1.094	0.812	1.824	0	Thresh = 1019
2	1.884	1669.62	334.729	2.016	1.189	0.825	1.695	60	Area > 0.5um^2
3	1.951	1717.19	357.372	1.956	1.27	0.879	1.541	120	Tau:	192.7	s
4	2.06	1730.14	358.865	1.997	1.313	0.884	1.521	180	Fusion Length:	0.993372	um
5	2.069	1743.66	361.278	1.944	1.355	0.877	1.435	240	Tau/FusLength:	193.986	s/um
6	2.102	1769.45	369.975	1.94	1.38	0.892	1.406	300
7	2.127	1790.9	360.95	1.936	1.399	0.902	1.383	360
8	2.212	1786.94	359.778	1.927	1.461	0.912	1.319	420
9	2.279	1816.76	349.458	1.954	1.485	0.881	1.316	480
10	2.312	1829.11	343.426	1.987	1.482	0.894	1.341	540
11	2.388	1820.95	344.686	1.984	1.532	0.906	1.295	600
12	2.422	1821.21	335.904	2.016	1.53	0.919	1.318	660
13	2.464	1804.04	337.41	2.019	1.553	0.894	1.3	720
14	2.497	1819.67	337.557	2.028	1.568	0.906	1.293	780
15	2.531	1823.59	341.168	2.051	1.572	0.902	1.305	840
16	2.531	1830.06	321.609	2.023	1.593	0.918	1.27	900
#15
1	3.002	2874.57	547.947	2.903	1.317	0.666	2.205	0	Thresh = 1656
2	3.128	2925.18	569.551	2.883	1.381	0.7	2.088	60	Area > 0.5um^2
3	3.204	2945.11	560.469	2.847	1.433	0.721	1.986	120	Tau:	439.7	s
4	3.263	2978.07	569.592	2.823	1.472	0.745	1.918	180	Fusion Length:	1.44525	um
5	3.338	2982.03	563.825	2.823	1.506	0.751	1.875	240	Tau/FusLength:	304.237	s/um
6	3.33	3028.28	539.353	2.798	1.515	0.749	1.847	300
7	3.439	3017.3	562.83	2.81	1.559	0.774	1.803	360
8	3.456	3038.25	549.915	2.788	1.578	0.8	1.767	420
9	3.532	3026.12	562.162	2.776	1.62	0.79	1.714	480
10	3.515	3051.51	531.556	2.77	1.616	0.807	1.714	540
11	3.65	3019.86	560.142	2.78	1.672	0.809	1.663	600
12	3.658	3026.32	554.596	2.783	1.673	0.795	1.663	660
13	3.7	3035.45	541.928	2.76	1.707	0.821	1.617	720
14	3.734	3042.99	531.749	2.769	1.717	0.816	1.613	780
15	3.759	3047.79	544.862	2.768	1.729	0.801	1.601	840
16	3.809	3037.39	527.362	2.729	1.777	0.833	1.536	900
#16
1	3.036	1769.92	347.832	2.558	1.511	0.712	1.693	0	Thresh = 1064
2	3.33	1839.49	369.831	2.593	1.635	0.765	1.585	60	Area > 0.5um^2
3	3.465	1874.99	354.868	2.582	1.708	0.812	1.511	120	Tau:	288	s
4	3.557	1900.8	356.648	2.553	1.774	0.822	1.439	180	Fusion Length:	1.25778	um
5	3.666	1920.72	359.254	2.586	1.805	0.83	1.433	240	Tau/FusLength:	228.974	s/um
6	3.759	1927.56	365.241	2.595	1.844	0.834	1.407	300
7	3.826	1937.3	353.462	2.6	1.874	0.82	1.387	360
8	3.935	1934.11	359.413	2.606	1.923	0.844	1.355	420
9	3.952	1957.79	351.863	2.596	1.938	0.864	1.339	480
10	4.062	1957.23	361.81	2.611	1.981	0.871	1.318	540
11	4.154	1956.09	355.646	2.623	2.016	0.878	1.301	600
12	4.188	1965.05	346.016	2.61	2.043	0.868	1.277	660
13	4.247	1965.31	346.889	2.628	2.057	0.88	1.277	720
14	4.255	1963.57	346.298	2.619	2.069	0.882	1.266	780
15	4.314	1960.08	340.831	2.635	2.085	0.889	1.264	840
16	4.373	1958.75	343.875	2.645	2.105	0.877	1.257	900
#17
1	1.337	1430.26	240.926	1.717	0.991	0.801	1.732	0	Thresh = 951
2	1.371	1463.07	244.17	1.695	1.029	0.802	1.647	60	Area > 0.5um^2
3	1.396	1465.7	240.806	1.698	1.047	0.773	1.623	120	Tau:	362.6	s
4	1.438	1463.05	251.888	1.704	1.074	0.862	1.586	180	Fusion Length:	0.848213	um
5	1.404	1490.15	243.072	1.643	1.088	0.85	1.511	240	Tau/FusLength:	427.487	s/um
6	1.438	1480.2	258.306	1.631	1.123	0.879	1.452	300
7	1.455	1515.11	258.856	1.663	1.114	0.852	1.492	360
8	1.472	1516.74	271.865	1.666	1.125	0.842	1.481	420
9	1.455	1538.26	265.364	1.611	1.15	0.889	1.401	480
10	1.472	1509.74	243.963	1.637	1.145	0.87	1.43	540
11	1.497	1515.48	264.469	1.631	1.168	0.885	1.396	600
12	1.48	1538.11	254.266	1.61	1.17	0.875	1.376	660
13	1.505	1544.5	270.024	1.646	1.164	0.881	1.414	720
14	1.522	1525.61	261.304	1.625	1.192	0.9	1.363	780
15	1.53	1520.7	252.649	1.628	1.197	0.905	1.361	840
16	1.539	1528.17	269.012	1.617	1.212	0.889	1.334	900
#18
1	3.473	1863.76	302.756	3.037	1.456	0.716	2.086	0	Thresh = 1133
2	3.523	1885.07	290.074	2.988	1.502	0.73	1.99	60	Area > 0.5um^2
3	3.607	1889.49	292.192	2.992	1.535	0.758	1.949	120	Tau:	349.8	s
4	3.633	1913.58	295.327	2.962	1.562	0.785	1.896	180	Fusion Length:	1.51721	um
5	3.641	1901.93	276.372	2.934	1.58	0.787	1.857	240	Tau/FusLength:	230.554	s/um
6	3.692	1902.13	282.433	2.933	1.602	0.787	1.831	300
7	3.734	1913.39	285.437	2.928	1.624	0.807	1.803	360
8	3.7	1920.82	278.882	2.872	1.64	0.804	1.751	420
9	3.717	1912.41	274.408	2.872	1.648	0.808	1.743	480
10	3.767	1909.82	281.92	2.887	1.661	0.814	1.738	540
11	3.75	1909.96	271.278	2.874	1.662	0.827	1.729	600
12	3.759	1908.77	269.961	2.868	1.669	0.829	1.719	660
13	3.784	1897.66	269.855	2.87	1.679	0.846	1.71	720
14	3.809	1903.83	279.795	2.876	1.687	0.823	1.705	780
15	3.818	1892.48	272.961	2.839	1.712	0.854	1.658	840
16	3.826	1903.24	271.387	2.84	1.715	0.827	1.656	900
#19
1	2.775	2608.16	591.771	3.104	1.138	0.552	2.726	0	Thresh = 1542
2	3.187	2800.22	566.049	3.131	1.296	0.638	2.416	60	Area > 0.5um^2
3	3.305	2874.33	567.268	3.106	1.355	0.67	2.292	120	Tau:	228.8	s
4	3.414	2896.08	580.968	3.101	1.402	0.67	2.213	180	Fusion Length:	1.49576	um
5	3.439	2936.52	563.515	3.099	1.413	0.711	2.193	240	Tau/FusLength:	152.965	s/um
6	3.532	2943.75	576.298	3.076	1.462	0.716	2.105	300
7	3.565	2952.38	559.174	3.066	1.481	0.723	2.071	360
8	3.599	2976.39	570.05	3.058	1.499	0.755	2.041	420
9	3.616	2980.8	555.835	3.065	1.502	0.748	2.041	480
10	3.65	2974.78	556.803	3.03	1.534	0.761	1.976	540
11	3.692	2952.01	560.327	3.028	1.552	0.759	1.95	600
12	3.658	2965.8	534.817	2.985	1.56	0.767	1.914	660
13	3.675	2960.49	538.601	2.992	1.564	0.77	1.913	720
14	3.717	2960.19	543.96	3.005	1.575	0.769	1.908	780
15	3.675	2963.19	520.765	2.962	1.58	0.786	1.875	840
16	3.683	2984.12	516.706	2.975	1.576	0.799	1.887	900
#20
1	3.254	2539.74	585.82	2.875	1.441	0.694	1.995	0	Thresh = 1519
2	3.809	2687.45	558.404	3.02	1.606	0.768	1.881	60	Area > 0.5um^2
3	3.893	2751.23	555.721	3.007	1.649	0.775	1.824	120	Tau:	386.3	s
4	3.994	2786.66	568.207	3.004	1.693	0.79	1.774	180	Fusion Length:	1.4375	um
5	4.036	2790.37	554.465	2.999	1.714	0.799	1.75	240	Tau/FusLength:	268.731	s/um
6	4.078	2838.63	558.597	2.984	1.74	0.807	1.715	300
7	4.171	2836.4	556.79	2.985	1.779	0.803	1.678	360
8	4.213	2831.03	552.881	2.991	1.794	0.811	1.667	420
9	4.28	2854.53	552.582	2.986	1.825	0.824	1.636	480
10	4.289	2863.96	560.51	2.984	1.83	0.826	1.631	540
11	4.322	2889.05	543.25	2.957	1.861	0.828	1.589	600
12	4.406	2919.76	548.64	2.974	1.887	0.828	1.576	660
13	4.65	2929.69	556.635	3.056	1.938	0.841	1.577	720
14	4.726	2957.62	556.443	3.068	1.962	0.844	1.564	780
15	4.81	2971.09	562.419	3.054	2.005	0.859	1.523	840
16	4.852	2969.43	556.94	3.075	2.009	0.825	1.531	900
