# Supplementary material for: Condensation of LINE-1 is critical for retrotransposition
Source: eLife journal article supplement (doi:10.7554/elife.82991), 2023-04-28
Supplement: supp [file totalPunctaPerCell_maxZfindMaxima_2021009_HeLaORF1mut_punctaImaging_rep2_Prom75.xlsx]

## Sheet: Summary
WT_PunctaPerCell	StammerDel_PunctaPerCell	StammerAAA_PunctaPerCell	StammerAEA_PunctaPerCell
0	0	0	1
0	1	0	3
0	1	0	4
3	0	0	11
12	0	0	0
17	0	1	0
12	0	0	1
181	2	0	1
0	0	0	11
1	0	0	20
2	0	0	0
1	0	7	5
3	1	2	0
2	0	17	0
0	0	10	3
0	1	9	0
1	0	80	1
7	0	0	1
7	1	0	40
58	8	0	0
28	0	0	0
32	0	0	1
0	0	0	0
9	1	0	0
0	0	2	1
0	1	2	1
0	0	2	1
0	1	1	1
5	0	0	9
8	0	6	15
0	0	11	21
0	0	0	1
0	0	0	1
0	1	6	0
0	1	1	0
13	1	3	0
27	3	3	0
9	7	10	0
0	0	66	0
5	0	101	0
1	0	1	0
16	0	0	49
8	0	0	0
28	0	0	0
38	1	0	1
79	0	0	0
2	0	0	0
1	0	0	54
0	0	5	1
4	0	3	1
2	1	15	0
12	0	14	2
7	2	46	2
53	0	52	3
2	1	41	3
1	0	2	0
3	0	1	0
0	0	1	1
25	0	0	0
62	0	1	1
44	0	2	6
0	2	5	0
2	0	73	40
0	0	74	35
1	0	2	2
0	0	0	0
3	0	3	0
1	0	0	0
1	0	6	0
0	0	0	1
8	0	1	2
1	0	5	1
0	2	3	1
0	0	5	0
0	0	4	0
0	1	44	1
0	0	36	3
0	1	148	0
67	0	0	2
95	0	2	4
	1	0	18
	0	2	29
	0	0	24
	0	5	0
	0	27	3
	0	40	0
	0	0	1
	0	0	0
	0	0	1
	1	0	5
	9	2	2
	19	4	9
		10
		23
		18
		35
		76

## Sheet: WT
FOV	Cell	Area	# of Puncta
HeLaSS16_6hrDox_Z001	1	647.559	0
HeLaSS16_6hrDox_Z001	2	532.584	0
HeLaSS16_6hrDox_Z001	3	436.207	0
HeLaSS16_6hrDox_Z001	4	592.664	3
HeLaSS16_6hrDox_Z001	5	521.637	12
HeLaSS16_6hrDox_Z001	6	543.476	17
HeLaSS16_6hrDox_Z001	7	416.33	12
HeLaSS16_6hrDox_Z001	8	1156.43	181
HeLaSS16_6hrDox_Z002	1	453.653	0
HeLaSS16_6hrDox_Z002	2	760.517	1
HeLaSS16_6hrDox_Z002	3	773.228	2
HeLaSS16_6hrDox_Z002	4	514.597	1
HeLaSS16_6hrDox_Z002	5	769.177	3
HeLaSS16_6hrDox_Z002	6	891.498	2
HeLaSS16_6hrDox_Z003	1	738.282	0
HeLaSS16_6hrDox_Z003	2	695.738	0
HeLaSS16_6hrDox_Z003	3	675.843	1
HeLaSS16_6hrDox_Z003	4	636.774	7
HeLaSS16_6hrDox_Z003	5	521.097	7
HeLaSS16_6hrDox_Z004	1	1528.51	58
HeLaSS16_6hrDox_Z004	2	1360.82	28
HeLaSS16_6hrDox_Z004	3	1004.73	32
HeLaSS16_6hrDox_Z005	1	318.189	0
HeLaSS16_6hrDox_Z005	2	606.869	9
HeLaSS16_6hrDox_Z005	3	651.412	0
HeLaSS16_6hrDox_Z005	4	524.734	0
HeLaSS16_6hrDox_Z005	5	453.509	0
HeLaSS16_6hrDox_Z005	6	930.621	0
HeLaSS16_6hrDox_Z005	7	723.086	5
HeLaSS16_6hrDox_Z005	8	725.373	8
HeLaSS16_6hrDox_Z006	1	599.325	0
HeLaSS16_6hrDox_Z006	2	660.468	0
HeLaSS16_6hrDox_Z006	3	504.785	0
HeLaSS16_6hrDox_Z006	4	372.238	0
HeLaSS16_6hrDox_Z006	5	640.303	0
HeLaSS16_6hrDox_Z006	6	746.708	13
HeLaSS16_6hrDox_Z006	7	841.446	27
HeLaSS16_6hrDox_Z006	8	777.855	9
HeLaSS16_6hrDox_Z007	1	762.102	0
HeLaSS16_6hrDox_Z007	2	668.588	5
HeLaSS16_6hrDox_Z007	3	774.993	1
HeLaSS16_6hrDox_Z007	4	325.895	16
HeLaSS16_6hrDox_Z007	5	264.824	8
HeLaSS16_6hrDox_Z007	6	773.174	28
HeLaSS16_6hrDox_Z007	7	547.527	38
HeLaSS16_6hrDox_Z007	8	768.241	79
HeLaSS16_6hrDox_Z008	1	585.786	2
HeLaSS16_6hrDox_Z008	2	658.037	1
HeLaSS16_6hrDox_Z008	3	369.483	0
HeLaSS16_6hrDox_Z008	4	708.269	4
HeLaSS16_6hrDox_Z008	5	489.265	2
HeLaSS16_6hrDox_Z008	6	759.689	12
HeLaSS16_6hrDox_Z008	7	703.39	7
HeLaSS16_6hrDox_Z008	8	410.767	53
HeLaSS16_6hrDox_Z009	1	1288.76	2
HeLaSS16_6hrDox_Z009	2	457.128	1
HeLaSS16_6hrDox_Z009	3	636	3
HeLaSS16_6hrDox_Z009	4	426.196	0
HeLaSS16_6hrDox_Z009	5	544.124	25
HeLaSS16_6hrDox_Z009	6	798.632	62
HeLaSS16_6hrDox_Z009	7	848	44
HeLaSS16_6hrDox_Z010	1	458.604	0
HeLaSS16_6hrDox_Z010	2	552.694	2
HeLaSS16_6hrDox_Z010	3	707.909	0
HeLaSS16_6hrDox_Z010	4	393.393	1
HeLaSS16_6hrDox_Z010	5	480.191	0
HeLaSS16_6hrDox_Z010	6	570.302	3
HeLaSS16_6hrDox_Z010	7	520.521	1
HeLaSS16_6hrDox_Z010	8	730.9	1
HeLaSS16_6hrDox_Z010	9	341.991	0
HeLaSS16_6hrDox_Z010	10	991.53	8
HeLaSS16_6hrDox_Z011	1	746.24	1
HeLaSS16_6hrDox_Z011	2	687.492	0
HeLaSS16_6hrDox_Z011	3	766.657	0
HeLaSS16_6hrDox_Z011	4	778.486	0
HeLaSS16_6hrDox_Z012	1	1003	0
HeLaSS16_6hrDox_Z012	2	577.486	0
HeLaSS16_6hrDox_Z012	3	429.671	0
HeLaSS16_6hrDox_Z012	4	1390	67
HeLaSS16_6hrDox_Z012	5	1412.04	95

## Sheet: StammerDel
FOV	Cell	Area	# of Puncta
HeLaSS21_6hrDox_Z001	1	617.672	0
HeLaSS21_6hrDox_Z001	2	992.214	1
HeLaSS21_6hrDox_Z001	3	326.489	1
HeLaSS21_6hrDox_Z001	4	576.982	0
HeLaSS21_6hrDox_Z001	5	732.701	0
HeLaSS21_6hrDox_Z001	6	849.098	0
HeLaSS21_6hrDox_Z002	1	564.991	0
HeLaSS21_6hrDox_Z002	2	942.126	2
HeLaSS21_6hrDox_Z002	3	749.229	0
HeLaSS21_6hrDox_Z002	4	403.565	0
HeLaSS21_6hrDox_Z002	5	613.801	0
HeLaSS21_6hrDox_Z002	6	437.323	0
HeLaSS21_6hrDox_Z003	1	436.495	1
HeLaSS21_6hrDox_Z003	2	1072.71	0
HeLaSS21_6hrDox_Z003	3	584.22	0
HeLaSS21_6hrDox_Z003	4	235.748	1
HeLaSS21_6hrDox_Z003	5	395.985	0
HeLaSS21_6hrDox_Z003	6	275.555	0
HeLaSS21_6hrDox_Z003	7	341.577	1
HeLaSS21_6hrDox_Z003	8	1032.15	8
HeLaSS21_6hrDox_Z004	1	573.255	0
HeLaSS21_6hrDox_Z004	2	543.494	0
HeLaSS21_6hrDox_Z004	3	835.685	0
HeLaSS21_6hrDox_Z004	4	668.588	1
HeLaSS21_6hrDox_Z004	5	277.157	0
HeLaSS21_6hrDox_Z004	6	905.776	1
HeLaSS21_6hrDox_Z004	7	444.471	0
HeLaSS21_6hrDox_Z004	8	783.023	1
HeLaSS21_6hrDox_Z005	1	462.457	0
HeLaSS21_6hrDox_Z005	2	502.823	0
HeLaSS21_6hrDox_Z005	3	464.87	0
HeLaSS21_6hrDox_Z005	4	686.394	0
HeLaSS21_6hrDox_Z005	5	406.41	0
HeLaSS21_6hrDox_Z005	6	580.187	1
HeLaSS21_6hrDox_Z005	7	332.232	1
HeLaSS21_6hrDox_Z005	8	668.66	1
HeLaSS21_6hrDox_Z005	9	663.276	3
HeLaSS21_6hrDox_Z005	10	960.364	7
HeLaSS21_6hrDox_Z006	1	558.384	0
HeLaSS21_6hrDox_Z006	2	718.207	0
HeLaSS21_6hrDox_Z006	3	366.62	0
HeLaSS21_6hrDox_Z006	4	211.928	0
HeLaSS21_6hrDox_Z006	5	488.635	0
HeLaSS21_6hrDox_Z006	6	327.371	0
HeLaSS21_6hrDox_Z006	7	329.82	1
HeLaSS21_6hrDox_Z006	8	339.092	0
HeLaSS21_6hrDox_Z006	9	242.337	0
HeLaSS21_6hrDox_Z006	10	302.651	0
HeLaSS21_6hrDox_Z007	1	504.533	0
HeLaSS21_6hrDox_Z007	2	1396.68	0
HeLaSS21_6hrDox_Z007	3	577.234	1
HeLaSS21_6hrDox_Z007	4	446.937	0
HeLaSS21_6hrDox_Z007	5	1036.16	2
HeLaSS21_6hrDox_Z008	1	325.589	0
HeLaSS21_6hrDox_Z008	2	336.157	1
HeLaSS21_6hrDox_Z008	3	739.956	0
HeLaSS21_6hrDox_Z008	4	732.575	0
HeLaSS21_6hrDox_Z008	5	833.002	0
HeLaSS21_6hrDox_Z008	6	733.889	0
HeLaSS21_6hrDox_Z009	1	641.311	0
HeLaSS21_6hrDox_Z009	2	582.923	0
HeLaSS21_6hrDox_Z009	3	806.428	2
HeLaSS21_6hrDox_Z009	4	466.04	0
HeLaSS21_6hrDox_Z009	5	576.568	0
HeLaSS21_6hrDox_Z009	6	559.95	0
HeLaSS21_6hrDox_Z009	7	464.546	0
HeLaSS21_6hrDox_Z009	8	776.469	0
HeLaSS21_6hrDox_Z009	9	616.519	0
HeLaSS21_6hrDox_Z010	1	259.477	0
HeLaSS21_6hrDox_Z010	2	395.805	0
HeLaSS21_6hrDox_Z010	3	602.098	0
HeLaSS21_6hrDox_Z010	4	508.89	0
HeLaSS21_6hrDox_Z010	5	441.518	2
HeLaSS21_6hrDox_Z010	6	570.843	0
HeLaSS21_6hrDox_Z010	7	561.534	0
HeLaSS21_6hrDox_Z010	8	469.911	1
HeLaSS21_6hrDox_Z010	9	786.263	0
HeLaSS21_6hrDox_Z011	1	412.441	1
HeLaSS21_6hrDox_Z011	2	597.615	0
HeLaSS21_6hrDox_Z011	3	321.484	0
HeLaSS21_6hrDox_Z011	4	742.135	1
HeLaSS21_6hrDox_Z011	5	1158.02	0
HeLaSS21_6hrDox_Z011	6	2137.41	0
HeLaSS21_6hrDox_Z011	7	1074.62	0
HeLaSS21_6hrDox_Z012	1	1167.04	0
HeLaSS21_6hrDox_Z012	2	426.737	0
HeLaSS21_6hrDox_Z012	3	476.626	0
HeLaSS21_6hrDox_Z012	4	384.031	0
HeLaSS21_6hrDox_Z012	5	897.728	0
HeLaSS21_6hrDox_Z012	6	737.166	1
HeLaSS21_6hrDox_Z012	7	825.603	9
HeLaSS21_6hrDox_Z012	8	1311.38	19

## Sheet: StammerAAA
FOV	Cell	Area	# of Puncta
HeLaSS22_6hrDox_Z001	1	766.693	0
HeLaSS22_6hrDox_Z001	2	626.818	0
HeLaSS22_6hrDox_Z001	3	417.41	0
HeLaSS22_6hrDox_Z001	4	346.816	0
HeLaSS22_6hrDox_Z001	5	380.718	0
HeLaSS22_6hrDox_Z001	6	292.875	1
HeLaSS22_6hrDox_Z001	7	340.208	0
HeLaSS22_6hrDox_Z001	8	678.922	0
HeLaSS22_6hrDox_Z001	9	363.218	0
HeLaSS22_6hrDox_Z002	1	460.567	0
HeLaSS22_6hrDox_Z002	2	255.624	0
HeLaSS22_6hrDox_Z002	3	1143.34	7
HeLaSS22_6hrDox_Z002	4	696.764	2
HeLaSS22_6hrDox_Z002	5	1131.53	17
HeLaSS22_6hrDox_Z002	6	247.018	10
HeLaSS22_6hrDox_Z002	7	278.022	9
HeLaSS22_6hrDox_Z002	8	873.044	80
HeLaSS22_6hrDox_Z003	1	565.531	0
HeLaSS22_6hrDox_Z003	2	663.366	0
HeLaSS22_6hrDox_Z003	3	553.955	0
HeLaSS22_6hrDox_Z003	4	622.875	0
HeLaSS22_6hrDox_Z003	5	713.022	0
HeLaSS22_6hrDox_Z003	6	346.222	0
HeLaSS22_6hrDox_Z003	7	402.071	0
HeLaSS22_6hrDox_Z003	8	671.666	2
HeLaSS22_6hrDox_Z003	9	896.035	2
HeLaSS22_6hrDox_Z004	1	455.507	2
HeLaSS22_6hrDox_Z004	2	515.732	1
HeLaSS22_6hrDox_Z004	3	934.402	0
HeLaSS22_6hrDox_Z004	4	582.617	6
HeLaSS22_6hrDox_Z004	5	477.545	11
HeLaSS22_6hrDox_Z005	1	371.734	0
HeLaSS22_6hrDox_Z005	2	448.864	0
HeLaSS22_6hrDox_Z005	3	532.025	6
HeLaSS22_6hrDox_Z005	4	334.195	1
HeLaSS22_6hrDox_Z005	5	489.103	3
HeLaSS22_6hrDox_Z005	6	539.731	3
HeLaSS22_6hrDox_Z005	7	734.357	10
HeLaSS22_6hrDox_Z005	8	489.643	66
HeLaSS22_6hrDox_Z005	9	687.78	101
HeLaSS22_6hrDox_Z006	1	655.174	1
HeLaSS22_6hrDox_Z006	2	438.025	0
HeLaSS22_6hrDox_Z006	3	498.267	0
HeLaSS22_6hrDox_Z006	4	610.146	0
HeLaSS22_6hrDox_Z006	5	490.724	0
HeLaSS22_6hrDox_Z006	6	339.02	0
HeLaSS22_6hrDox_Z006	7	525.328	0
HeLaSS22_6hrDox_Z006	8	483.72	0
HeLaSS22_6hrDox_Z006	9	340.496	5
HeLaSS22_6hrDox_Z006	10	447.297	3
HeLaSS22_6hrDox_Z006	11	761.85	15
HeLaSS22_6hrDox_Z006	12	409.831	14
HeLaSS22_6hrDox_Z006	13	425.566	46
HeLaSS22_6hrDox_Z006	14	522.123	52
HeLaSS22_6hrDox_Z006	15	478.787	41
HeLaSS22_6hrDox_Z007	1	751.659	2
HeLaSS22_6hrDox_Z007	2	468.164	1
HeLaSS22_6hrDox_Z007	3	847.046	1
HeLaSS22_6hrDox_Z007	4	947.257	0
HeLaSS22_6hrDox_Z008	1	614.485	1
HeLaSS22_6hrDox_Z008	2	568.412	2
HeLaSS22_6hrDox_Z008	3	1137.45	5
HeLaSS22_6hrDox_Z008	4	1292.9	73
HeLaSS22_6hrDox_Z008	5	1019.36	74
HeLaSS22_6hrDox_Z009	1	616.951	2
HeLaSS22_6hrDox_Z009	2	591.205	0
HeLaSS22_6hrDox_Z009	3	763.29	3
HeLaSS22_6hrDox_Z009	4	708.701	0
HeLaSS22_6hrDox_Z009	5	608.615	6
HeLaSS22_6hrDox_Z009	6	438.817	0
HeLaSS22_6hrDox_Z009	7	995.977	1
HeLaSS22_6hrDox_Z009	8	602.116	5
HeLaSS22_6hrDox_Z010	1	747.23	3
HeLaSS22_6hrDox_Z010	2	598.587	5
HeLaSS22_6hrDox_Z010	3	592.016	4
HeLaSS22_6hrDox_Z010	4	605.087	44
HeLaSS22_6hrDox_Z010	5	694.046	36
HeLaSS22_6hrDox_Z010	6	742.477	148
HeLaSS22_6hrDox_Z011	1	553.432	0
HeLaSS22_6hrDox_Z011	2	642.409	2
HeLaSS22_6hrDox_Z011	3	689.653	0
HeLaSS22_6hrDox_Z011	4	651.033	2
HeLaSS22_6hrDox_Z011	5	581.735	0
HeLaSS22_6hrDox_Z011	6	845.191	5
HeLaSS22_6hrDox_Z011	7	483.414	27
HeLaSS22_6hrDox_Z011	8	607.571	40
HeLaSS22_6hrDox_Z012	1	395.877	0
HeLaSS22_6hrDox_Z012	2	429.995	0
HeLaSS22_6hrDox_Z012	3	423.352	0
HeLaSS22_6hrDox_Z012	4	393.015	0
HeLaSS22_6hrDox_Z012	5	827.367	2
HeLaSS22_6hrDox_Z012	6	646.856	4
HeLaSS22_6hrDox_Z012	7	605.555	10
HeLaSS22_6hrDox_Z012	8	848.27	23
HeLaSS22_6hrDox_Z012	9	156.007	18
HeLaSS22_6hrDox_Z012	10	244.228	35
HeLaSS22_6hrDox_Z012	11	818.905	76

## Sheet: StammerAEA
FOV	Cell	Area	# of Puncta
HeLaSS27_6hrDox_Z001	1	575.758	1
HeLaSS27_6hrDox_Z001	2	538.399	3
HeLaSS27_6hrDox_Z001	3	1641.54	4
HeLaSS27_6hrDox_Z001	4	899.996	11
HeLaSS27_6hrDox_Z002	1	675.303	0
HeLaSS27_6hrDox_Z002	2	565.333	0
HeLaSS27_6hrDox_Z002	3	801.315	1
HeLaSS27_6hrDox_Z002	4	895.351	1
HeLaSS27_6hrDox_Z002	5	1196.8	11
HeLaSS27_6hrDox_Z002	6	469.749	20
HeLaSS27_6hrDox_Z003	1	406.41	0
HeLaSS27_6hrDox_Z003	2	781.168	5
HeLaSS27_6hrDox_Z003	3	786.443	0
HeLaSS27_6hrDox_Z003	4	531.971	0
HeLaSS27_6hrDox_Z003	5	317.775	3
HeLaSS27_6hrDox_Z003	6	228.168	0
HeLaSS27_6hrDox_Z003	7	323.014	1
HeLaSS27_6hrDox_Z003	8	645.992	1
HeLaSS27_6hrDox_Z003	9	835.775	40
HeLaSS27_6hrDox_Z004	1	499.186	0
HeLaSS27_6hrDox_Z004	2	648.747	0
HeLaSS27_6hrDox_Z004	3	471.855	1
HeLaSS27_6hrDox_Z004	4	496.017	0
HeLaSS27_6hrDox_Z004	5	429.239	0
HeLaSS27_6hrDox_Z004	6	306.954	1
HeLaSS27_6hrDox_Z004	7	678.292	1
HeLaSS27_6hrDox_Z004	8	407.832	1
HeLaSS27_6hrDox_Z004	9	587.659	1
HeLaSS27_6hrDox_Z004	10	608.237	9
HeLaSS27_6hrDox_Z004	11	361.093	15
HeLaSS27_6hrDox_Z004	12	1036.41	21
HeLaSS27_6hrDox_Z005	1	930.621	1
HeLaSS27_6hrDox_Z005	2	1254.03	1
HeLaSS27_6hrDox_Z005	3	674.907	0
HeLaSS27_6hrDox_Z005	4	993.6	0
HeLaSS27_6hrDox_Z005	5	925.652	0
HeLaSS27_6hrDox_Z006	1	697.628	0
HeLaSS27_6hrDox_Z006	2	810.749	0
HeLaSS27_6hrDox_Z006	3	391.88	0
HeLaSS27_6hrDox_Z006	4	735.095	0
HeLaSS27_6hrDox_Z006	5	624.531	0
HeLaSS27_6hrDox_Z006	6	736.806	49
HeLaSS27_6hrDox_Z007	1	497.115	0
HeLaSS27_6hrDox_Z007	2	813.486	0
HeLaSS27_6hrDox_Z007	3	687.492	1
HeLaSS27_6hrDox_Z007	4	627.952	0
HeLaSS27_6hrDox_Z007	5	1830.31	0
HeLaSS27_6hrDox_Z007	6	1147.43	54
HeLaSS27_6hrDox_Z008	1	405.6	1
HeLaSS27_6hrDox_Z008	2	460.387	1
HeLaSS27_6hrDox_Z008	3	586.794	0
HeLaSS27_6hrDox_Z008	4	474.88	2
HeLaSS27_6hrDox_Z008	5	387.361	2
HeLaSS27_6hrDox_Z008	6	519.332	3
HeLaSS27_6hrDox_Z008	7	661.53	3
HeLaSS27_6hrDox_Z009	1	575.938	0
HeLaSS27_6hrDox_Z009	2	669.218	0
HeLaSS27_6hrDox_Z009	3	524.446	1
HeLaSS27_6hrDox_Z009	4	397.498	0
HeLaSS27_6hrDox_Z009	5	692.335	1
HeLaSS27_6hrDox_Z009	6	474.268	6
HeLaSS27_6hrDox_Z009	7	587.352	0
HeLaSS27_6hrDox_Z009	8	471.351	40
HeLaSS27_6hrDox_Z009	9	491.102	35
HeLaSS27_6hrDox_Z010	1	869.605	2
HeLaSS27_6hrDox_Z010	2	699.681	0
HeLaSS27_6hrDox_Z010	3	860.009	0
HeLaSS27_6hrDox_Z010	4	741.793	0
HeLaSS27_6hrDox_Z010	5	604.168	0
HeLaSS27_6hrDox_Z010	6	911.267	1
HeLaSS27_6hrDox_Z010	7	691.363	2
HeLaSS27_6hrDox_Z010	8	1116.39	1
HeLaSS27_6hrDox_Z011	1	934.996	1
HeLaSS27_6hrDox_Z011	2	628.798	0
HeLaSS27_6hrDox_Z011	3	281.37	0
HeLaSS27_6hrDox_Z011	4	651.304	1
HeLaSS27_6hrDox_Z011	5	816.51	3
HeLaSS27_6hrDox_Z011	6	401.693	0
HeLaSS27_6hrDox_Z011	7	311.852	2
HeLaSS27_6hrDox_Z011	8	539.695	4
HeLaSS27_6hrDox_Z011	9	780.322	18
HeLaSS27_6hrDox_Z011	10	511.951	29
HeLaSS27_6hrDox_Z011	11	460.585	24
HeLaSS27_6hrDox_Z012	1	805.6	0
HeLaSS27_6hrDox_Z012	2	819.337	3
HeLaSS27_6hrDox_Z012	3	343.701	0
HeLaSS27_6hrDox_Z012	4	515.444	1
HeLaSS27_6hrDox_Z012	5	473.044	0
HeLaSS27_6hrDox_Z012	6	607.211	1
HeLaSS27_6hrDox_Z012	7	1320.12	5
HeLaSS27_6hrDox_Z012	8	858.28	2
HeLaSS27_6hrDox_Z012	9	562.092	9
