# Supplementary material for: Condensation of LINE-1 is critical for retrotransposition
Source: eLife journal article supplement (doi:10.7554/elife.82991), 2023-04-28
Supplement: supp [file totalPunctaPerCell_maxZfindMaxima_2021009_HeLaORF1mut_punctaImaging_rep2_Prom75.xlsx]

## Sheet: Summary
WT_PunctaPerCell	K3AK4A_PunctaPerCell	R261A_PunctaPerCell
0	0	0
0	1	0
0	5	0
3	1	2
12	12	1
17	34	0
12	1	0
181	1	0
0	0	0
1	6	0
2	1	0
1	0	0
3	1	0
2	0	0
0	0	0
0	3	1
1	0	0
7	10	0
7	6	0
58	5	0
28	1	0
32	2	1
0	1	0
9	2	1
0	5	1
0	10	0
0	12	1
0	7	3
5	1	12
8	0	14
0	1	2
0	0	0
0	0	2
0	1	3
0	1	0
13	0	0
27	4	0
9	1	3
0	1	3
5	0	0
1	0	0
16	1	0
8	4	0
28	9	0
38	4	0
79	5	0
2	10	0
1	10	0
0	7	0
4	5	0
2	1	0
12	0	0
7	6	0
53	1	0
2	0	6
1	0	12
3	0	1
0	0	0
25	0	0
62	0	0
44	0	0
0	0	4
2	2	50
0	0	4
1	0	0
0	1	0
3	1	0
1	1	1
1	0	0
0	0	0
8	3	1
1	0	0
0	0	0
0	2	1
0	14	0
0	53	0
0	90	0
0	0	0
67	0	0
95	1	0
	0	0
	0	1
		0
		0
		1
		0
		0
		0
		0
		0
		0
		1
		8
		2
		2
		2
		16
		9

## Sheet: WT
FOV	Cell	Area	# of Puncta
HeLaSS16_6hrDox_Z001	1	647.559	0
HeLaSS16_6hrDox_Z001	2	532.584	0
HeLaSS16_6hrDox_Z001	3	436.207	0
HeLaSS16_6hrDox_Z001	4	592.664	3
HeLaSS16_6hrDox_Z001	5	521.637	12
HeLaSS16_6hrDox_Z001	6	543.476	17
HeLaSS16_6hrDox_Z001	7	416.33	12
HeLaSS16_6hrDox_Z001	8	1156.43	181
HeLaSS16_6hrDox_Z002	1	453.653	0
HeLaSS16_6hrDox_Z002	2	760.517	1
HeLaSS16_6hrDox_Z002	3	773.228	2
HeLaSS16_6hrDox_Z002	4	514.597	1
HeLaSS16_6hrDox_Z002	5	769.177	3
HeLaSS16_6hrDox_Z002	6	891.498	2
HeLaSS16_6hrDox_Z003	1	738.282	0
HeLaSS16_6hrDox_Z003	2	695.738	0
HeLaSS16_6hrDox_Z003	3	675.843	1
HeLaSS16_6hrDox_Z003	4	636.774	7
HeLaSS16_6hrDox_Z003	5	521.097	7
HeLaSS16_6hrDox_Z004	1	1528.51	58
HeLaSS16_6hrDox_Z004	2	1360.82	28
HeLaSS16_6hrDox_Z004	3	1004.73	32
HeLaSS16_6hrDox_Z005	1	318.189	0
HeLaSS16_6hrDox_Z005	2	606.869	9
HeLaSS16_6hrDox_Z005	3	651.412	0
HeLaSS16_6hrDox_Z005	4	524.734	0
HeLaSS16_6hrDox_Z005	5	453.509	0
HeLaSS16_6hrDox_Z005	6	930.621	0
HeLaSS16_6hrDox_Z005	7	723.086	5
HeLaSS16_6hrDox_Z005	8	725.373	8
HeLaSS16_6hrDox_Z006	1	599.325	0
HeLaSS16_6hrDox_Z006	2	660.468	0
HeLaSS16_6hrDox_Z006	3	504.785	0
HeLaSS16_6hrDox_Z006	4	372.238	0
HeLaSS16_6hrDox_Z006	5	640.303	0
HeLaSS16_6hrDox_Z006	6	746.708	13
HeLaSS16_6hrDox_Z006	7	841.446	27
HeLaSS16_6hrDox_Z006	8	777.855	9
HeLaSS16_6hrDox_Z007	1	762.102	0
HeLaSS16_6hrDox_Z007	2	668.588	5
HeLaSS16_6hrDox_Z007	3	774.993	1
HeLaSS16_6hrDox_Z007	4	325.895	16
HeLaSS16_6hrDox_Z007	5	264.824	8
HeLaSS16_6hrDox_Z007	6	773.174	28
HeLaSS16_6hrDox_Z007	7	547.527	38
HeLaSS16_6hrDox_Z007	8	768.241	79
HeLaSS16_6hrDox_Z008	1	585.786	2
HeLaSS16_6hrDox_Z008	2	658.037	1
HeLaSS16_6hrDox_Z008	3	369.483	0
HeLaSS16_6hrDox_Z008	4	708.269	4
HeLaSS16_6hrDox_Z008	5	489.265	2
HeLaSS16_6hrDox_Z008	6	759.689	12
HeLaSS16_6hrDox_Z008	7	703.39	7
HeLaSS16_6hrDox_Z008	8	410.767	53
HeLaSS16_6hrDox_Z009	1	1288.76	2
HeLaSS16_6hrDox_Z009	2	457.128	1
HeLaSS16_6hrDox_Z009	3	636	3
HeLaSS16_6hrDox_Z009	4	426.196	0
HeLaSS16_6hrDox_Z009	5	544.124	25
HeLaSS16_6hrDox_Z009	6	798.632	62
HeLaSS16_6hrDox_Z009	7	848	44
HeLaSS16_6hrDox_Z010	1	458.604	0
HeLaSS16_6hrDox_Z010	2	552.694	2
HeLaSS16_6hrDox_Z010	3	707.909	0
HeLaSS16_6hrDox_Z010	4	393.393	1
HeLaSS16_6hrDox_Z010	5	480.191	0
HeLaSS16_6hrDox_Z010	6	570.302	3
HeLaSS16_6hrDox_Z010	7	520.521	1
HeLaSS16_6hrDox_Z010	8	730.9	1
HeLaSS16_6hrDox_Z010	9	341.991	0
HeLaSS16_6hrDox_Z010	10	991.53	8
HeLaSS16_6hrDox_Z011	1	746.24	1
HeLaSS16_6hrDox_Z011	2	687.492	0
HeLaSS16_6hrDox_Z011	3	766.657	0
HeLaSS16_6hrDox_Z011	4	778.486	0
HeLaSS16_6hrDox_Z012	1	1003	0
HeLaSS16_6hrDox_Z012	2	577.486	0
HeLaSS16_6hrDox_Z012	3	429.671	0
HeLaSS16_6hrDox_Z012	4	1390	67
HeLaSS16_6hrDox_Z012	5	1412.04	95

## Sheet: K3AK4A
FOV	Cell	Area	# of Puncta
HeLaSS23_6hrDox_Z001	1	449.512	0
HeLaSS23_6hrDox_Z001	2	396.291	1
HeLaSS23_6hrDox_Z001	3	500.158	5
HeLaSS23_6hrDox_Z001	4	439.196	1
HeLaSS23_6hrDox_Z001	5	673.485	12
HeLaSS23_6hrDox_Z001	6	745.772	34
HeLaSS23_6hrDox_Z002	1	518.558	1
HeLaSS23_6hrDox_Z002	2	484.494	1
HeLaSS23_6hrDox_Z002	3	1418.93	0
HeLaSS23_6hrDox_Z002	4	498.754	6
HeLaSS23_6hrDox_Z002	5	632.147	1
HeLaSS23_6hrDox_Z003	1	276.977	0
HeLaSS23_6hrDox_Z003	2	531.089	1
HeLaSS23_6hrDox_Z003	3	1049.31	0
HeLaSS23_6hrDox_Z003	4	602.026	0
HeLaSS23_6hrDox_Z003	5	895.135	3
HeLaSS23_6hrDox_Z003	6	451.348	0
HeLaSS23_6hrDox_Z003	7	1267.16	10
HeLaSS23_6hrDox_Z003	8	1054.31	6
HeLaSS23_6hrDox_Z004	1	461.701	5
HeLaSS23_6hrDox_Z004	2	388.46	1
HeLaSS23_6hrDox_Z004	3	406.41	2
HeLaSS23_6hrDox_Z004	4	395.751	1
HeLaSS23_6hrDox_Z004	5	731.837	2
HeLaSS23_6hrDox_Z004	6	463.825	5
HeLaSS23_6hrDox_Z004	7	466.688	10
HeLaSS23_6hrDox_Z004	8	675.429	12
HeLaSS23_6hrDox_Z004	9	737.904	7
HeLaSS23_6hrDox_Z004	10	471.405	1
HeLaSS23_6hrDox_Z004	11	530.729	0
HeLaSS23_6hrDox_Z005	1	453.473	1
HeLaSS23_6hrDox_Z005	2	647.307	0
HeLaSS23_6hrDox_Z005	3	848.792	0
HeLaSS23_6hrDox_Z005	4	991.98	1
HeLaSS23_6hrDox_Z005	5	1190.59	1
HeLaSS23_6hrDox_Z005	6	905.812	0
HeLaSS23_6hrDox_Z005	7	1046.28	4
HeLaSS23_6hrDox_Z006	1	690.823	1
HeLaSS23_6hrDox_Z006	2	781.438	1
HeLaSS23_6hrDox_Z006	3	592.43	0
HeLaSS23_6hrDox_Z006	4	798.506	0
HeLaSS23_6hrDox_Z006	5	636.378	1
HeLaSS23_6hrDox_Z006	6	957.592	4
HeLaSS23_6hrDox_Z006	7	798.902	9
HeLaSS23_6hrDox_Z007	1	760.409	4
HeLaSS23_6hrDox_Z007	2	1006.42	5
HeLaSS23_6hrDox_Z007	3	646.334	10
HeLaSS23_6hrDox_Z007	4	798.488	10
HeLaSS23_6hrDox_Z007	5	885.557	7
HeLaSS23_6hrDox_Z007	6	997.183	5
HeLaSS23_6hrDox_Z008	1	795.572	1
HeLaSS23_6hrDox_Z008	2	535.392	0
HeLaSS23_6hrDox_Z008	3	609.12	6
HeLaSS23_6hrDox_Z008	4	616.339	1
HeLaSS23_6hrDox_Z008	5	650.043	0
HeLaSS23_6hrDox_Z008	6	716.029	0
HeLaSS23_6hrDox_Z008	7	748.382	0
HeLaSS23_6hrDox_Z008	8	605.411	0
HeLaSS23_6hrDox_Z009	1	994.662	0
HeLaSS23_6hrDox_Z009	2	533.916	0
HeLaSS23_6hrDox_Z009	3	526.678	0
HeLaSS23_6hrDox_Z009	4	626.188	0
HeLaSS23_6hrDox_Z009	5	451.276	2
HeLaSS23_6hrDox_Z009	6	466.31	0
HeLaSS23_6hrDox_Z009	7	452.573	0
HeLaSS23_6hrDox_Z009	8	520.359	1
HeLaSS23_6hrDox_Z010	1	931.504	1
HeLaSS23_6hrDox_Z010	2	1067.44	1
HeLaSS23_6hrDox_Z010	3	998.479	0
HeLaSS23_6hrDox_Z010	4	743.899	0
HeLaSS23_6hrDox_Z010	5	1477.21	3
HeLaSS23_6hrDox_Z011	1	672.008	0
HeLaSS23_6hrDox_Z011	2	886.493	0
HeLaSS23_6hrDox_Z011	3	552.604	2
HeLaSS23_6hrDox_Z011	4	855.58	14
HeLaSS23_6hrDox_Z011	5	1566.05	53
HeLaSS23_6hrDox_Z011	6	981.987	90
HeLaSS23_6hrDox_Z012	1	969.745	0
HeLaSS23_6hrDox_Z012	2	600.586	0
HeLaSS23_6hrDox_Z012	3	533.088	1
HeLaSS23_6hrDox_Z012	4	642.535	0
HeLaSS23_6hrDox_Z012	5	892.29	0

## Sheet: R261A
FOV	Cell	Area	# of Puncta
HeLaSS24_6hrDox_Z001	1	690.337	0
HeLaSS24_6hrDox_Z001	2	682.433	0
HeLaSS24_6hrDox_Z001	3	790.692	0
HeLaSS24_6hrDox_Z001	4	696.098	2
HeLaSS24_6hrDox_Z001	5	497.025	1
HeLaSS24_6hrDox_Z001	6	672.747	0
HeLaSS24_6hrDox_Z001	7	1063.91	0
HeLaSS24_6hrDox_Z001	8	1436.72	0
HeLaSS24_6hrDox_Z002	1	598.209	0
HeLaSS24_6hrDox_Z002	2	585.048	0
HeLaSS24_6hrDox_Z002	3	411.271	0
HeLaSS24_6hrDox_Z002	4	735.005	0
HeLaSS24_6hrDox_Z002	5	487.699	0
HeLaSS24_6hrDox_Z002	6	566.342	0
HeLaSS24_6hrDox_Z002	7	826.899	0
HeLaSS24_6hrDox_Z002	8	511.303	1
HeLaSS24_6hrDox_Z002	9	429.167	0
HeLaSS24_6hrDox_Z002	10	937.643	0
HeLaSS24_6hrDox_Z003	1	773.408	0
HeLaSS24_6hrDox_Z003	2	275.915	0
HeLaSS24_6hrDox_Z003	3	505.991	0
HeLaSS24_6hrDox_Z003	4	671.45	1
HeLaSS24_6hrDox_Z003	5	336.499	0
HeLaSS24_6hrDox_Z003	6	841.59	1
HeLaSS24_6hrDox_Z003	7	613.045	1
HeLaSS24_6hrDox_Z003	8	511.681	0
HeLaSS24_6hrDox_Z004	1	954.243	1
HeLaSS24_6hrDox_Z004	2	1090.88	3
HeLaSS24_6hrDox_Z004	3	1042.32	12
HeLaSS24_6hrDox_Z004	4	1020.61	14
HeLaSS24_6hrDox_Z005	1	692.605	2
HeLaSS24_6hrDox_Z005	2	543.404	0
HeLaSS24_6hrDox_Z005	3	602.872	2
HeLaSS24_6hrDox_Z005	4	510.69	3
HeLaSS24_6hrDox_Z005	5	490.832	0
HeLaSS24_6hrDox_Z005	6	366.638	0
HeLaSS24_6hrDox_Z005	7	1292.81	0
HeLaSS24_6hrDox_Z005	8	653.77	3
HeLaSS24_6hrDox_Z005	9	991.692	3
HeLaSS24_6hrDox_Z006	1	439.988	0
HeLaSS24_6hrDox_Z006	2	797.444	0
HeLaSS24_6hrDox_Z006	3	682.217	0
HeLaSS24_6hrDox_Z006	4	654.346	0
HeLaSS24_6hrDox_Z006	5	466.976	0
HeLaSS24_6hrDox_Z006	6	631.679	0
HeLaSS24_6hrDox_Z006	7	572.661	0
HeLaSS24_6hrDox_Z006	8	755.746	0
HeLaSS24_6hrDox_Z006	9	714.498	0
HeLaSS24_6hrDox_Z007	1	818.725	0
HeLaSS24_6hrDox_Z007	2	495.675	0
HeLaSS24_6hrDox_Z007	3	490.058	0
HeLaSS24_6hrDox_Z007	4	350.813	0
HeLaSS24_6hrDox_Z007	5	538.651	0
HeLaSS24_6hrDox_Z007	6	557.735	0
HeLaSS24_6hrDox_Z007	7	284.647	6
HeLaSS24_6hrDox_Z007	8	1611	12
HeLaSS24_6hrDox_Z008	1	820.147	1
HeLaSS24_6hrDox_Z008	2	1059.73	0
HeLaSS24_6hrDox_Z008	3	355.98	0
HeLaSS24_6hrDox_Z008	4	509.736	0
HeLaSS24_6hrDox_Z008	5	774.399	0
HeLaSS24_6hrDox_Z008	6	817.213	4
HeLaSS24_6hrDox_Z008	7	631.157	50
HeLaSS24_6hrDox_Z008	8	998.353	4
HeLaSS24_6hrDox_Z009	1	635.028	0
HeLaSS24_6hrDox_Z009	2	506.297	0
HeLaSS24_6hrDox_Z009	3	518.486	0
HeLaSS24_6hrDox_Z009	4	985.21	1
HeLaSS24_6hrDox_Z009	5	810.839	0
HeLaSS24_6hrDox_Z009	6	669.614	0
HeLaSS24_6hrDox_Z009	7	601.918	1
HeLaSS24_6hrDox_Z010	1	998.065	0
HeLaSS24_6hrDox_Z010	2	523.437	0
HeLaSS24_6hrDox_Z010	3	398.56	1
HeLaSS24_6hrDox_Z010	4	484.314	0
HeLaSS24_6hrDox_Z010	5	328.559	0
HeLaSS24_6hrDox_Z010	6	545.169	0
HeLaSS24_6hrDox_Z010	7	374.884	0
HeLaSS24_6hrDox_Z010	8	525.886	0
HeLaSS24_6hrDox_Z010	9	352.487	0
HeLaSS24_6hrDox_Z010	10	756.952	0
HeLaSS24_6hrDox_Z010	11	722.42	1
HeLaSS24_6hrDox_Z011	1	559.23	0
HeLaSS24_6hrDox_Z011	2	606.329	0
HeLaSS24_6hrDox_Z011	3	592.934	1
HeLaSS24_6hrDox_Z011	4	881.092	0
HeLaSS24_6hrDox_Z011	5	944.521	0
HeLaSS24_6hrDox_Z011	6	875.618	0
HeLaSS24_6hrDox_Z012	1	398.812	0
HeLaSS24_6hrDox_Z012	2	531.701	0
HeLaSS24_6hrDox_Z012	3	382.536	0
HeLaSS24_6hrDox_Z012	4	786.948	1
HeLaSS24_6hrDox_Z012	5	860.153	8
HeLaSS24_6hrDox_Z012	6	748.13	2
HeLaSS24_6hrDox_Z012	7	806.734	2
HeLaSS24_6hrDox_Z012	8	495.189	2
HeLaSS24_6hrDox_Z012	9	401.747	16
HeLaSS24_6hrDox_Z012	10	350.813	9
