# Supplementary material for: Condensation of LINE-1 is critical for retrotransposition
Source: eLife journal article supplement (doi:10.7554/elife.82991), 2023-04-28
Supplement: supp [file totalPunctaPerCell_maxZfindMaxima_2021016_HeLaORF1mut_punctaImaging_rep3_Prom75.xlsx]

## Sheet: Summary
WT_PunctaPerCell	K3AK4A_PunctaPerCell	R261A_PunctaPerCell
0	0	0
8	1	0
13	0	0
12	0	0
23	0	0
0	0	0
3	0	0
3	0	0
4	0	1
0	0	0
0	7	0
0	21	0
3	0	0
0	0	0
1	0	0
58	0	0
40	1	0
54	0	0
0	0	1
1	0	0
0	0	0
0	0	0
6	1	0
10	1	0
10	0	0
28	2	0
2	0	0
1	1	0
26	0	0
1	0	1
0	0	0
0	0	0
1	0	0
4	0	0
2	0	0
5	0	0
0	0	0
1	0	0
0	0	1
1	0	0
12	0	0
2	0	0
0	0	0
0	0	0
2	0	0
6	0	0
5	0	0
1	0	1
2	1	0
0	0	1
1	0	0
0	0	0
6	0	0
1	0	0
0	0	0
2	1	0
0	0	0
0	0	0
0	0	0
1	1	0
0	2	0
0	0	0
0	0	0
3	1	0
0	0	0
0	0	0
40	0	1
56	0	0
44	0	0
37	0	0
41	0	0
0	0	0
1	4	0
1	4	0
0	2	0
2	0	0
13	0	0
5	0	0
7	0	0
10	0	0
73	1	0
0	0	0
0	0	0
0	0	3
1	0	16
0	0
0	1
0
26
0
2
6
6
15
23
34
34
91

## Sheet: WT
FOV	Cell	Area	# of Puncta
HeLaSS16_6hrDox_Z001	1	581.969	0
HeLaSS16_6hrDox_Z001	2	1495.99	8
HeLaSS16_6hrDox_Z001	3	651.538	13
HeLaSS16_6hrDox_Z001	4	1243.28	12
HeLaSS16_6hrDox_Z001	5	1183.4	23
HeLaSS16_6hrDox_Z002	1	620.03	0
HeLaSS16_6hrDox_Z002	2	435.973	3
HeLaSS16_6hrDox_Z002	3	505.991	3
HeLaSS16_6hrDox_Z002	4	509.556	4
HeLaSS16_6hrDox_Z002	5	611.532	0
HeLaSS16_6hrDox_Z002	6	431.328	0
HeLaSS16_6hrDox_Z002	7	593.096	0
HeLaSS16_6hrDox_Z002	8	513.571	3
HeLaSS16_6hrDox_Z002	9	625.053	0
HeLaSS16_6hrDox_Z002	10	544.682	1
HeLaSS16_6hrDox_Z002	11	1169	58
HeLaSS16_6hrDox_Z002	12	438.313	40
HeLaSS16_6hrDox_Z002	13	502.48	54
HeLaSS16_6hrDox_Z003	1	795.211	0
HeLaSS16_6hrDox_Z003	2	606.887	1
HeLaSS16_6hrDox_Z003	3	667.453	0
HeLaSS16_6hrDox_Z003	4	428.807	0
HeLaSS16_6hrDox_Z003	5	842.167	6
HeLaSS16_6hrDox_Z003	6	871.82	10
HeLaSS16_6hrDox_Z003	7	706.703	10
HeLaSS16_6hrDox_Z003	8	632.561	28
HeLaSS16_6hrDox_Z004	1	1099.88	2
HeLaSS16_6hrDox_Z004	2	949.886	1
HeLaSS16_6hrDox_Z004	3	1306.5	26
HeLaSS16_6hrDox_Z005	1	698.835	1
HeLaSS16_6hrDox_Z005	2	695.018	0
HeLaSS16_6hrDox_Z005	3	454.787	0
HeLaSS16_6hrDox_Z005	4	718.153	1
HeLaSS16_6hrDox_Z005	5	423.28	4
HeLaSS16_6hrDox_Z005	6	660.162	2
HeLaSS16_6hrDox_Z005	7	593.456	5
HeLaSS16_6hrDox_Z006	1	766.081	0
HeLaSS16_6hrDox_Z006	2	515.786	1
HeLaSS16_6hrDox_Z006	3	432.066	0
HeLaSS16_6hrDox_Z006	4	495.135	1
HeLaSS16_6hrDox_Z006	5	620.588	12
HeLaSS16_6hrDox_Z007	1	1471.45	2
HeLaSS16_6hrDox_Z007	2	959.806	0
HeLaSS16_6hrDox_Z007	3	741.991	0
HeLaSS16_6hrDox_Z007	4	1156.09	2
HeLaSS16_6hrDox_Z007	5	802.359	6
HeLaSS16_6hrDox_Z007	6	1018.61	5
HeLaSS16_6hrDox_Z008	1	476.518	1
HeLaSS16_6hrDox_Z008	2	292.839	2
HeLaSS16_6hrDox_Z008	3	353.531	0
HeLaSS16_6hrDox_Z008	4	396.724	1
HeLaSS16_6hrDox_Z008	5	369.555	0
HeLaSS16_6hrDox_Z008	6	631.013	6
HeLaSS16_6hrDox_Z008	7	569.42	1
HeLaSS16_6hrDox_Z008	8	507.702	0
HeLaSS16_6hrDox_Z008	9	578.296	2
HeLaSS16_6hrDox_Z008	10	874.556	0
HeLaSS16_6hrDox_Z008	11	611.748	0
HeLaSS16_6hrDox_Z009	1	399.784	0
HeLaSS16_6hrDox_Z009	2	590.881	1
HeLaSS16_6hrDox_Z009	3	414.404	0
HeLaSS16_6hrDox_Z009	4	864.294	0
HeLaSS16_6hrDox_Z009	5	669.236	0
HeLaSS16_6hrDox_Z009	6	387.901	3
HeLaSS16_6hrDox_Z009	7	243.129	0
HeLaSS16_6hrDox_Z009	8	332.736	0
HeLaSS16_6hrDox_Z009	9	491.57	40
HeLaSS16_6hrDox_Z009	10	603.25	56
HeLaSS16_6hrDox_Z009	11	560.256	44
HeLaSS16_6hrDox_Z009	12	614.791	37
HeLaSS16_6hrDox_Z009	13	758.951	41
HeLaSS16_6hrDox_Z010	1	475.996	0
HeLaSS16_6hrDox_Z010	2	429.329	1
HeLaSS16_6hrDox_Z010	3	490.94	1
HeLaSS16_6hrDox_Z010	4	498.466	0
HeLaSS16_6hrDox_Z010	5	657.803	2
HeLaSS16_6hrDox_Z010	6	504.461	13
HeLaSS16_6hrDox_Z010	7	372.058	5
HeLaSS16_6hrDox_Z010	8	521.295	7
HeLaSS16_6hrDox_Z010	9	513.499	10
HeLaSS16_6hrDox_Z010	10	786.911	73
HeLaSS16_6hrDox_Z011	1	407.13	0
HeLaSS16_6hrDox_Z011	2	434.37	0
HeLaSS16_6hrDox_Z011	3	469.479	0
HeLaSS16_6hrDox_Z011	4	838.692	1
HeLaSS16_6hrDox_Z011	5	967.998	0
HeLaSS16_6hrDox_Z011	6	1026.64	0
HeLaSS16_6hrDox_Z011	7	926.967	0
HeLaSS16_6hrDox_Z011	8	1054.33	26
HeLaSS16_6hrDox_Z012	1	493.514	0
HeLaSS16_6hrDox_Z012	2	628.132	2
HeLaSS16_6hrDox_Z012	3	927.867	6
HeLaSS16_6hrDox_Z012	4	623.181	6
HeLaSS16_6hrDox_Z012	5	540.397	15
HeLaSS16_6hrDox_Z012	6	692.605	23
HeLaSS16_6hrDox_Z012	7	725.229	34
HeLaSS16_6hrDox_Z012	8	839.88	34
HeLaSS16_6hrDox_Z012	9	880.498	91

## Sheet: K3AK4A
FOV	Cell	Area	# of Puncta
HeLaSS23_6hrDox_Z001	1	604.294	0
HeLaSS23_6hrDox_Z001	2	639.385	1
HeLaSS23_6hrDox_Z001	3	663.636	0
HeLaSS23_6hrDox_Z001	4	960.04	0
HeLaSS23_6hrDox_Z001	5	1059.95	0
HeLaSS23_6hrDox_Z002	1	682.469	0
HeLaSS23_6hrDox_Z002	2	496.017	0
HeLaSS23_6hrDox_Z002	3	602.494	0
HeLaSS23_6hrDox_Z002	4	736.932	0
HeLaSS23_6hrDox_Z002	5	735.275	0
HeLaSS23_6hrDox_Z002	6	1405.95	7
HeLaSS23_6hrDox_Z002	7	1354.19	21
HeLaSS23_6hrDox_Z003	1	682.037	0
HeLaSS23_6hrDox_Z003	2	741.253	0
HeLaSS23_6hrDox_Z003	3	863.033	0
HeLaSS23_6hrDox_Z003	4	1442.46	0
HeLaSS23_6hrDox_Z003	5	869.641	1
HeLaSS23_6hrDox_Z003	6	798.578	0
HeLaSS23_6hrDox_Z004	1	710.483	0
HeLaSS23_6hrDox_Z004	2	771.77	0
HeLaSS23_6hrDox_Z004	3	494.18	0
HeLaSS23_6hrDox_Z004	4	782.572	0
HeLaSS23_6hrDox_Z004	5	990.774	1
HeLaSS23_6hrDox_Z004	6	736.302	1
HeLaSS23_6hrDox_Z004	7	1022.88	0
HeLaSS23_6hrDox_Z004	8	769.249	2
HeLaSS23_6hrDox_Z005	1	1102.36	0
HeLaSS23_6hrDox_Z005	2	767.611	1
HeLaSS23_6hrDox_Z005	3	580.529	0
HeLaSS23_6hrDox_Z005	4	563.011	0
HeLaSS23_6hrDox_Z005	5	447.856	0
HeLaSS23_6hrDox_Z005	6	784.679	0
HeLaSS23_6hrDox_Z005	7	500.716	0
HeLaSS23_6hrDox_Z005	8	1314.38	0
HeLaSS23_6hrDox_Z006	1	858.28	0
HeLaSS23_6hrDox_Z006	2	1201.46	0
HeLaSS23_6hrDox_Z006	3	815.142	0
HeLaSS23_6hrDox_Z006	4	644.606	0
HeLaSS23_6hrDox_Z006	5	548.319	0
HeLaSS23_6hrDox_Z007	1	499.042	0
HeLaSS23_6hrDox_Z007	2	439.736	0
HeLaSS23_6hrDox_Z007	3	338.03	0
HeLaSS23_6hrDox_Z007	4	620.912	0
HeLaSS23_6hrDox_Z007	5	525.166	0
HeLaSS23_6hrDox_Z007	6	481.451	0
HeLaSS23_6hrDox_Z007	7	494.703	0
HeLaSS23_6hrDox_Z007	8	412.603	0
HeLaSS23_6hrDox_Z007	9	975.11	0
HeLaSS23_6hrDox_Z007	10	445.785	1
HeLaSS23_6hrDox_Z008	1	738.912	0
HeLaSS23_6hrDox_Z008	2	554.315	0
HeLaSS23_6hrDox_Z008	3	844.489	0
HeLaSS23_6hrDox_Z008	4	728.416	0
HeLaSS23_6hrDox_Z008	5	578.854	0
HeLaSS23_6hrDox_Z008	6	557.285	0
HeLaSS23_6hrDox_Z008	7	895.657	1
HeLaSS23_6hrDox_Z009	1	590.053	0
HeLaSS23_6hrDox_Z009	2	986.903	0
HeLaSS23_6hrDox_Z009	3	1038.48	0
HeLaSS23_6hrDox_Z009	4	844.039	1
HeLaSS23_6hrDox_Z009	5	794.023	2
HeLaSS23_6hrDox_Z010	1	345.934	0
HeLaSS23_6hrDox_Z010	2	255.066	0
HeLaSS23_6hrDox_Z010	3	181.303	1
HeLaSS23_6hrDox_Z010	4	276.095	0
HeLaSS23_6hrDox_Z010	5	475.24	0
HeLaSS23_6hrDox_Z010	6	451.456	0
HeLaSS23_6hrDox_Z010	7	511.086	0
HeLaSS23_6hrDox_Z010	8	384.229	0
HeLaSS23_6hrDox_Z010	9	436.585	0
HeLaSS23_6hrDox_Z010	10	700.185	0
HeLaSS23_6hrDox_Z010	11	637.278	0
HeLaSS23_6hrDox_Z010	12	405.384	4
HeLaSS23_6hrDox_Z010	13	388.424	4
HeLaSS23_6hrDox_Z010	14	662.934	2
HeLaSS23_6hrDox_Z011	1	667.075	0
HeLaSS23_6hrDox_Z011	2	549.922	0
HeLaSS23_6hrDox_Z011	3	774.146	0
HeLaSS23_6hrDox_Z011	4	580.763	0
HeLaSS23_6hrDox_Z011	5	776.793	0
HeLaSS23_6hrDox_Z011	6	1215.59	1
HeLaSS23_6hrDox_Z011	7	900.446	0
HeLaSS23_6hrDox_Z012	1	576.946	0
HeLaSS23_6hrDox_Z012	2	421.227	0
HeLaSS23_6hrDox_Z012	3	599.919	0
HeLaSS23_6hrDox_Z012	4	547.383	0
HeLaSS23_6hrDox_Z012	5	888.059	1

## Sheet: R261A
FOV	Cell	Area	# of Puncta
HeLaSS24_6hrDox_Z001	1	455.399	0
HeLaSS24_6hrDox_Z001	2	511.195	0
HeLaSS24_6hrDox_Z001	3	589.603	0
HeLaSS24_6hrDox_Z001	4	809.183	0
HeLaSS24_6hrDox_Z001	5	812.297	0
HeLaSS24_6hrDox_Z001	6	519.26	0
HeLaSS24_6hrDox_Z001	7	896.161	0
HeLaSS24_6hrDox_Z002	1	1167.68	0
HeLaSS24_6hrDox_Z002	2	1180.41	1
HeLaSS24_6hrDox_Z002	3	959.32	0
HeLaSS24_6hrDox_Z002	4	1028.69	0
HeLaSS24_6hrDox_Z002	5	734.861	0
HeLaSS24_6hrDox_Z002	6	712.374	0
HeLaSS24_6hrDox_Z003	1	920.485	0
HeLaSS24_6hrDox_Z003	2	1115.76	0
HeLaSS24_6hrDox_Z003	3	702.454	0
HeLaSS24_6hrDox_Z003	4	617.221	0
HeLaSS24_6hrDox_Z003	5	966.594	0
HeLaSS24_6hrDox_Z003	6	944.467	1
HeLaSS24_6hrDox_Z003	7	856.75	0
HeLaSS24_6hrDox_Z004	1	807.58	0
HeLaSS24_6hrDox_Z004	2	1209.81	0
HeLaSS24_6hrDox_Z004	3	696.98	0
HeLaSS24_6hrDox_Z004	4	459.666	0
HeLaSS24_6hrDox_Z004	5	506.423	0
HeLaSS24_6hrDox_Z004	6	628.474	0
HeLaSS24_6hrDox_Z005	1	733.151	0
HeLaSS24_6hrDox_Z005	2	817.501	0
HeLaSS24_6hrDox_Z005	3	671.432	0
HeLaSS24_6hrDox_Z005	4	944.233	1
HeLaSS24_6hrDox_Z005	5	623.883	0
HeLaSS24_6hrDox_Z005	6	687.384	0
HeLaSS24_6hrDox_Z005	7	881.146	0
HeLaSS24_6hrDox_Z005	8	856.174	0
HeLaSS24_6hrDox_Z006	1	601.594	0
HeLaSS24_6hrDox_Z006	2	838.8	0
HeLaSS24_6hrDox_Z006	3	663.528	0
HeLaSS24_6hrDox_Z006	4	1062.21	0
HeLaSS24_6hrDox_Z006	5	459.72	1
HeLaSS24_6hrDox_Z006	6	900.5	0
HeLaSS24_6hrDox_Z006	7	437.305	0
HeLaSS24_6hrDox_Z007	1	706.613	0
HeLaSS24_6hrDox_Z007	2	603.394	0
HeLaSS24_6hrDox_Z007	3	430.121	0
HeLaSS24_6hrDox_Z007	4	586.848	0
HeLaSS24_6hrDox_Z007	5	1010.7	0
HeLaSS24_6hrDox_Z007	6	752.703	0
HeLaSS24_6hrDox_Z007	7	1316.63	1
HeLaSS24_6hrDox_Z008	1	546.177	0
HeLaSS24_6hrDox_Z008	2	533.178	1
HeLaSS24_6hrDox_Z008	3	932.422	0
HeLaSS24_6hrDox_Z008	4	724.653	0
HeLaSS24_6hrDox_Z008	5	618.374	0
HeLaSS24_6hrDox_Z008	6	911.681	0
HeLaSS24_6hrDox_Z009	1	1327.53	0
HeLaSS24_6hrDox_Z009	2	1161.47	0
HeLaSS24_6hrDox_Z009	3	855.04	0
HeLaSS24_6hrDox_Z009	4	1288.76	0
HeLaSS24_6hrDox_Z009	5	1091.11	0
HeLaSS24_6hrDox_Z010	1	559.824	0
HeLaSS24_6hrDox_Z010	2	611.748	0
HeLaSS24_6hrDox_Z010	3	672.134	0
HeLaSS24_6hrDox_Z010	4	546.321	0
HeLaSS24_6hrDox_Z010	5	505.901	0
HeLaSS24_6hrDox_Z010	6	638.358	0
HeLaSS24_6hrDox_Z010	7	1055.3	0
HeLaSS24_6hrDox_Z010	8	985.858	1
HeLaSS24_6hrDox_Z011	1	654.67	0
HeLaSS24_6hrDox_Z011	2	555.269	0
HeLaSS24_6hrDox_Z011	3	519.314	0
HeLaSS24_6hrDox_Z011	4	514.849	0
HeLaSS24_6hrDox_Z011	5	523.833	0
HeLaSS24_6hrDox_Z011	6	621.813	0
HeLaSS24_6hrDox_Z011	7	901.22	0
HeLaSS24_6hrDox_Z011	8	582.167	0
HeLaSS24_6hrDox_Z011	9	587.208	0
HeLaSS24_6hrDox_Z012	1	530.351	0
HeLaSS24_6hrDox_Z012	2	600.856	0
HeLaSS24_6hrDox_Z012	3	520.827	0
HeLaSS24_6hrDox_Z012	4	715.777	0
HeLaSS24_6hrDox_Z012	5	643.256	0
HeLaSS24_6hrDox_Z012	6	266.661	0
HeLaSS24_6hrDox_Z012	7	952.407	0
HeLaSS24_6hrDox_Z012	8	857.938	3
HeLaSS24_6hrDox_Z012	9	880.732	16
