# Supplementary material for: Condensation of LINE-1 is critical for retrotransposition
Source: eLife journal article supplement (doi:10.7554/elife.82991), 2023-04-28
Supplement: supp [file totalPunctaPerCell_maxZfindMaxima_2021016_HeLaORF1mut_punctaImaging_rep3_Prom75.xlsx]

## Sheet: Summary
WT_PunctaPerCell	StammerDel_PunctaPerCell	StammerAAA_PunctaPerCell	StammerAEA_PunctaPerCell
0	0	0	1
8	0	1	0
13	0	0	1
12	0	10	0
23	0	39	0
0	0	109	0
3	0	0	0
3	0	0	0
4	4	2	1
0	11	1	0
0	37	0	0
0	0	0	0
3	0	0	2
0	0	3	1
1	0	0	6
58	0	0	29
40	0	0	0
54	0	8	0
0	1	6	0
1	0	7	0
0	0	1	0
0	0	2	1
6	0	1	1
10	0	2	1
10	1	15	0
28	0	13	0
2	0	45	1
1	0	0	0
26	0	0	0
1	0	0	0
0	0	0	1
0	0	6	0
1	0	7	0
4	0	40	0
2	0	67	36
5	0	13	2
0	0	20	3
1	0	7	0
0	0	18	0
1	0	21	0
12	0	47	0
2	0	0	36
0	0	0	40
0	0	0	0
2	0	0	0
6	0	1	1
5	1	0	1
1	0	0	0
2	0	0	1
0	0	4	4
1	0	8	2
0	0	32	2
6	2	0	5
1	1	0	0
0	0	0	0
2	0	1	0
0	1	0	0
0	0	0	0
0	0	2	1
1	0	0	6
0	0	5	20
0	0	2	0
0	0	0	0
3	0	0	0
0	0	10	0
0	0	6	0
40	0	12	0
56	0	0	0
44	0	0	0
37	0	0	0
41	0	1	2
0	0	0	3
1	6	0	0
1	7	1	2
0	0	0	20
2	0	3	12
13	0	6	15
5	0	12	45
7	0	18	57
10	0	0	82
73	0	0	0
0	0	0	0
0	0	0	0
0	1	0	0
1	3	3	0
0	3	18	3
0	0	0	0
0	0	3	0
26	0	1	0
0	0	0	4
2	0	0	4
6	0	7	9
6	0	4	8
15	0	27	0
23	10		0
34	5		0
34	0		0
91	0		0
	0		1
	0		5
	0		39
	0
	0
	2
	1
	0
	0
	0
	0
	0
	0
	0

## Sheet: WT
FOV	Cell	Area	# of Puncta
HeLaSS16_6hrDox_Z001	1	581.969	0
HeLaSS16_6hrDox_Z001	2	1495.99	8
HeLaSS16_6hrDox_Z001	3	651.538	13
HeLaSS16_6hrDox_Z001	4	1243.28	12
HeLaSS16_6hrDox_Z001	5	1183.4	23
HeLaSS16_6hrDox_Z002	1	620.03	0
HeLaSS16_6hrDox_Z002	2	435.973	3
HeLaSS16_6hrDox_Z002	3	505.991	3
HeLaSS16_6hrDox_Z002	4	509.556	4
HeLaSS16_6hrDox_Z002	5	611.532	0
HeLaSS16_6hrDox_Z002	6	431.328	0
HeLaSS16_6hrDox_Z002	7	593.096	0
HeLaSS16_6hrDox_Z002	8	513.571	3
HeLaSS16_6hrDox_Z002	9	625.053	0
HeLaSS16_6hrDox_Z002	10	544.682	1
HeLaSS16_6hrDox_Z002	11	1169	58
HeLaSS16_6hrDox_Z002	12	438.313	40
HeLaSS16_6hrDox_Z002	13	502.48	54
HeLaSS16_6hrDox_Z003	1	795.211	0
HeLaSS16_6hrDox_Z003	2	606.887	1
HeLaSS16_6hrDox_Z003	3	667.453	0
HeLaSS16_6hrDox_Z003	4	428.807	0
HeLaSS16_6hrDox_Z003	5	842.167	6
HeLaSS16_6hrDox_Z003	6	871.82	10
HeLaSS16_6hrDox_Z003	7	706.703	10
HeLaSS16_6hrDox_Z003	8	632.561	28
HeLaSS16_6hrDox_Z004	1	1099.88	2
HeLaSS16_6hrDox_Z004	2	949.886	1
HeLaSS16_6hrDox_Z004	3	1306.5	26
HeLaSS16_6hrDox_Z005	1	698.835	1
HeLaSS16_6hrDox_Z005	2	695.018	0
HeLaSS16_6hrDox_Z005	3	454.787	0
HeLaSS16_6hrDox_Z005	4	718.153	1
HeLaSS16_6hrDox_Z005	5	423.28	4
HeLaSS16_6hrDox_Z005	6	660.162	2
HeLaSS16_6hrDox_Z005	7	593.456	5
HeLaSS16_6hrDox_Z006	1	766.081	0
HeLaSS16_6hrDox_Z006	2	515.786	1
HeLaSS16_6hrDox_Z006	3	432.066	0
HeLaSS16_6hrDox_Z006	4	495.135	1
HeLaSS16_6hrDox_Z006	5	620.588	12
HeLaSS16_6hrDox_Z007	1	1471.45	2
HeLaSS16_6hrDox_Z007	2	959.806	0
HeLaSS16_6hrDox_Z007	3	741.991	0
HeLaSS16_6hrDox_Z007	4	1156.09	2
HeLaSS16_6hrDox_Z007	5	802.359	6
HeLaSS16_6hrDox_Z007	6	1018.61	5
HeLaSS16_6hrDox_Z008	1	476.518	1
HeLaSS16_6hrDox_Z008	2	292.839	2
HeLaSS16_6hrDox_Z008	3	353.531	0
HeLaSS16_6hrDox_Z008	4	396.724	1
HeLaSS16_6hrDox_Z008	5	369.555	0
HeLaSS16_6hrDox_Z008	6	631.013	6
HeLaSS16_6hrDox_Z008	7	569.42	1
HeLaSS16_6hrDox_Z008	8	507.702	0
HeLaSS16_6hrDox_Z008	9	578.296	2
HeLaSS16_6hrDox_Z008	10	874.556	0
HeLaSS16_6hrDox_Z008	11	611.748	0
HeLaSS16_6hrDox_Z009	1	399.784	0
HeLaSS16_6hrDox_Z009	2	590.881	1
HeLaSS16_6hrDox_Z009	3	414.404	0
HeLaSS16_6hrDox_Z009	4	864.294	0
HeLaSS16_6hrDox_Z009	5	669.236	0
HeLaSS16_6hrDox_Z009	6	387.901	3
HeLaSS16_6hrDox_Z009	7	243.129	0
HeLaSS16_6hrDox_Z009	8	332.736	0
HeLaSS16_6hrDox_Z009	9	491.57	40
HeLaSS16_6hrDox_Z009	10	603.25	56
HeLaSS16_6hrDox_Z009	11	560.256	44
HeLaSS16_6hrDox_Z009	12	614.791	37
HeLaSS16_6hrDox_Z009	13	758.951	41
HeLaSS16_6hrDox_Z010	1	475.996	0
HeLaSS16_6hrDox_Z010	2	429.329	1
HeLaSS16_6hrDox_Z010	3	490.94	1
HeLaSS16_6hrDox_Z010	4	498.466	0
HeLaSS16_6hrDox_Z010	5	657.803	2
HeLaSS16_6hrDox_Z010	6	504.461	13
HeLaSS16_6hrDox_Z010	7	372.058	5
HeLaSS16_6hrDox_Z010	8	521.295	7
HeLaSS16_6hrDox_Z010	9	513.499	10
HeLaSS16_6hrDox_Z010	10	786.911	73
HeLaSS16_6hrDox_Z011	1	407.13	0
HeLaSS16_6hrDox_Z011	2	434.37	0
HeLaSS16_6hrDox_Z011	3	469.479	0
HeLaSS16_6hrDox_Z011	4	838.692	1
HeLaSS16_6hrDox_Z011	5	967.998	0
HeLaSS16_6hrDox_Z011	6	1026.64	0
HeLaSS16_6hrDox_Z011	7	926.967	0
HeLaSS16_6hrDox_Z011	8	1054.33	26
HeLaSS16_6hrDox_Z012	1	493.514	0
HeLaSS16_6hrDox_Z012	2	628.132	2
HeLaSS16_6hrDox_Z012	3	927.867	6
HeLaSS16_6hrDox_Z012	4	623.181	6
HeLaSS16_6hrDox_Z012	5	540.397	15
HeLaSS16_6hrDox_Z012	6	692.605	23
HeLaSS16_6hrDox_Z012	7	725.229	34
HeLaSS16_6hrDox_Z012	8	839.88	34
HeLaSS16_6hrDox_Z012	9	880.498	91

## Sheet: StammerDel
FOV	Cell	Area	# of Puncta
HeLaSS21_6hrDox_Z001	1	365.072	0
HeLaSS21_6hrDox_Z001	2	432.012	0
HeLaSS21_6hrDox_Z001	3	494.847	0
HeLaSS21_6hrDox_Z001	4	467.588	0
HeLaSS21_6hrDox_Z001	5	477.563	0
HeLaSS21_6hrDox_Z001	6	645.848	0
HeLaSS21_6hrDox_Z001	7	467.354	0
HeLaSS21_6hrDox_Z001	8	421.137	0
HeLaSS21_6hrDox_Z001	9	1033.59	4
HeLaSS21_6hrDox_Z001	10	983.662	11
HeLaSS21_6hrDox_Z001	11	959.248	37
HeLaSS21_6hrDox_Z002	1	558.528	0
HeLaSS21_6hrDox_Z002	2	727.858	0
HeLaSS21_6hrDox_Z002	3	692.353	0
HeLaSS21_6hrDox_Z002	4	599.001	0
HeLaSS21_6hrDox_Z002	5	751.911	0
HeLaSS21_6hrDox_Z002	6	608.579	0
HeLaSS21_6hrDox_Z002	7	636.486	0
HeLaSS21_6hrDox_Z002	8	960.454	1
HeLaSS21_6hrDox_Z003	1	544.988	0
HeLaSS21_6hrDox_Z003	2	812.225	0
HeLaSS21_6hrDox_Z003	3	403.925	0
HeLaSS21_6hrDox_Z003	4	589.873	0
HeLaSS21_6hrDox_Z003	5	611.082	0
HeLaSS21_6hrDox_Z003	6	601.846	1
HeLaSS21_6hrDox_Z003	7	648.909	0
HeLaSS21_6hrDox_Z003	8	639.349	0
HeLaSS21_6hrDox_Z003	9	552.658	0
HeLaSS21_6hrDox_Z003	10	748.761	0
HeLaSS21_6hrDox_Z004	1	306.594	0
HeLaSS21_6hrDox_Z004	2	662.844	0
HeLaSS21_6hrDox_Z004	3	606.203	0
HeLaSS21_6hrDox_Z004	4	883.756	0
HeLaSS21_6hrDox_Z004	5	1000.46	0
HeLaSS21_6hrDox_Z004	6	677.968	0
HeLaSS21_6hrDox_Z004	7	489.967	0
HeLaSS21_6hrDox_Z004	8	432.102	0
HeLaSS21_6hrDox_Z005	1	392.457	0
HeLaSS21_6hrDox_Z005	2	403.223	0
HeLaSS21_6hrDox_Z005	3	597.705	0
HeLaSS21_6hrDox_Z005	4	417.987	0
HeLaSS21_6hrDox_Z005	5	492.776	0
HeLaSS21_6hrDox_Z005	6	771.104	0
HeLaSS21_6hrDox_Z005	7	823.136	0
HeLaSS21_6hrDox_Z005	8	466.832	0
HeLaSS21_6hrDox_Z005	9	1157.35	0
HeLaSS21_6hrDox_Z005	10	1057.52	1
HeLaSS21_6hrDox_Z006	1	417.014	0
HeLaSS21_6hrDox_Z006	2	596.265	0
HeLaSS21_6hrDox_Z006	3	413.756	0
HeLaSS21_6hrDox_Z006	4	951.686	0
HeLaSS21_6hrDox_Z006	5	646.874	0
HeLaSS21_6hrDox_Z006	6	1332.76	2
HeLaSS21_6hrDox_Z006	7	1495.88	1
HeLaSS21_6hrDox_Z007	1	998.623	0
HeLaSS21_6hrDox_Z007	2	932.908	0
HeLaSS21_6hrDox_Z007	3	660.684	1
HeLaSS21_6hrDox_Z007	4	554.369	0
HeLaSS21_6hrDox_Z007	5	646.802	0
HeLaSS21_6hrDox_Z007	6	1089.85	0
HeLaSS21_6hrDox_Z007	7	501.85	0
HeLaSS21_6hrDox_Z007	8	992.538	0
HeLaSS21_6hrDox_Z008	1	845.677	0
HeLaSS21_6hrDox_Z008	2	383.796	0
HeLaSS21_6hrDox_Z008	3	499.888	0
HeLaSS21_6hrDox_Z008	4	427.097	0
HeLaSS21_6hrDox_Z008	5	618.212	0
HeLaSS21_6hrDox_Z008	6	423.046	0
HeLaSS21_6hrDox_Z008	7	604.961	0
HeLaSS21_6hrDox_Z008	8	1081.21	0
HeLaSS21_6hrDox_Z008	9	601.036	0
HeLaSS21_6hrDox_Z008	10	443.156	0
HeLaSS21_6hrDox_Z008	11	453.815	6
HeLaSS21_6hrDox_Z008	12	450.718	7
HeLaSS21_6hrDox_Z009	1	421.497	0
HeLaSS21_6hrDox_Z009	2	405.222	0
HeLaSS21_6hrDox_Z009	3	342.009	0
HeLaSS21_6hrDox_Z009	4	422.344	0
HeLaSS21_6hrDox_Z009	5	440.978	0
HeLaSS21_6hrDox_Z009	6	372.796	0
HeLaSS21_6hrDox_Z009	7	433.776	0
HeLaSS21_6hrDox_Z009	8	619.058	0
HeLaSS21_6hrDox_Z009	9	556.259	0
HeLaSS21_6hrDox_Z009	10	396.688	1
HeLaSS21_6hrDox_Z009	11	481.217	3
HeLaSS21_6hrDox_Z009	12	1081.61	3
HeLaSS21_6hrDox_Z010	1	775.101	0
HeLaSS21_6hrDox_Z010	2	556.871	0
HeLaSS21_6hrDox_Z010	3	405.78	0
HeLaSS21_6hrDox_Z010	4	897.368	0
HeLaSS21_6hrDox_Z010	5	904.695	0
HeLaSS21_6hrDox_Z010	6	366.836	0
HeLaSS21_6hrDox_Z010	7	633.245	0
HeLaSS21_6hrDox_Z010	8	699.195	0
HeLaSS21_6hrDox_Z010	9	594.968	10
HeLaSS21_6hrDox_Z010	10	480.605	5
HeLaSS21_6hrDox_Z011	1	411.811	0
HeLaSS21_6hrDox_Z011	2	556.925	0
HeLaSS21_6hrDox_Z011	3	807.724	0
HeLaSS21_6hrDox_Z011	4	649.611	0
HeLaSS21_6hrDox_Z011	5	597.021	0
HeLaSS21_6hrDox_Z011	6	612.54	0
HeLaSS21_6hrDox_Z011	7	696.098	0
HeLaSS21_6hrDox_Z011	8	612.828	2
HeLaSS21_6hrDox_Z011	9	1245.39	1
HeLaSS21_6hrDox_Z012	1	794.167	0
HeLaSS21_6hrDox_Z012	2	591.169	0
HeLaSS21_6hrDox_Z012	3	572.895	0
HeLaSS21_6hrDox_Z012	4	635.352	0
HeLaSS21_6hrDox_Z012	5	970.753	0
HeLaSS21_6hrDox_Z012	6	820.741	0
HeLaSS21_6hrDox_Z012	7	1034.07	0

## Sheet: StammerAAA
FOV	Cell	Area	# of Puncta
HeLaSS22_6hrDox_Z001	1	780.214	0
HeLaSS22_6hrDox_Z001	2	861.557	1
HeLaSS22_6hrDox_Z001	3	902.355	0
HeLaSS22_6hrDox_Z001	4	1119.59	10
HeLaSS22_6hrDox_Z001	5	1211.69	39
HeLaSS22_6hrDox_Z001	6	1254.09	109
HeLaSS22_6hrDox_Z002	1	736.32	0
HeLaSS22_6hrDox_Z002	2	734.573	0
HeLaSS22_6hrDox_Z002	3	945.313	2
HeLaSS22_6hrDox_Z002	4	770.744	1
HeLaSS22_6hrDox_Z002	5	728.488	0
HeLaSS22_6hrDox_Z002	6	796.436	0
HeLaSS22_6hrDox_Z002	7	758.699	0
HeLaSS22_6hrDox_Z002	8	827.115	3
HeLaSS22_6hrDox_Z003	1	834.065	0
HeLaSS22_6hrDox_Z003	2	685.674	0
HeLaSS22_6hrDox_Z003	3	1076.1	0
HeLaSS22_6hrDox_Z003	4	850.773	8
HeLaSS22_6hrDox_Z003	5	824.468	6
HeLaSS22_6hrDox_Z003	6	1195.88	7
HeLaSS22_6hrDox_Z004	1	700.779	1
HeLaSS22_6hrDox_Z004	2	467.516	2
HeLaSS22_6hrDox_Z004	3	747.248	1
HeLaSS22_6hrDox_Z004	4	978.981	2
HeLaSS22_6hrDox_Z004	5	682.829	15
HeLaSS22_6hrDox_Z004	6	829.42	13
HeLaSS22_6hrDox_Z004	7	726.201	45
HeLaSS22_6hrDox_Z005	1	908.782	0
HeLaSS22_6hrDox_Z005	2	680.722	0
HeLaSS22_6hrDox_Z005	3	599.451	0
HeLaSS22_6hrDox_Z005	4	463.789	0
HeLaSS22_6hrDox_Z005	5	731.855	6
HeLaSS22_6hrDox_Z005	6	794.473	7
HeLaSS22_6hrDox_Z005	7	1003.05	40
HeLaSS22_6hrDox_Z005	8	923.762	67
HeLaSS22_6hrDox_Z006	1	1527.26	13
HeLaSS22_6hrDox_Z006	2	837.503	20
HeLaSS22_6hrDox_Z006	3	714.084	7
HeLaSS22_6hrDox_Z006	4	999.92	18
HeLaSS22_6hrDox_Z006	5	729.01	21
HeLaSS22_6hrDox_Z006	6	1209.72	47
HeLaSS22_6hrDox_Z007	1	373.138	0
HeLaSS22_6hrDox_Z007	2	318.423	0
HeLaSS22_6hrDox_Z007	3	449.206	0
HeLaSS22_6hrDox_Z007	4	468.308	0
HeLaSS22_6hrDox_Z007	5	493.586	1
HeLaSS22_6hrDox_Z007	6	546.123	0
HeLaSS22_6hrDox_Z007	7	527.47	0
HeLaSS22_6hrDox_Z007	8	478.427	0
HeLaSS22_6hrDox_Z007	9	771.05	4
HeLaSS22_6hrDox_Z007	10	534.906	8
HeLaSS22_6hrDox_Z007	11	704.2	32
HeLaSS22_6hrDox_Z008	1	555.179	0
HeLaSS22_6hrDox_Z008	2	703.372	0
HeLaSS22_6hrDox_Z008	3	714.066	0
HeLaSS22_6hrDox_Z008	4	840.51	1
HeLaSS22_6hrDox_Z008	5	547.257	0
HeLaSS22_6hrDox_Z008	6	746.834	0
HeLaSS22_6hrDox_Z008	7	831.184	2
HeLaSS22_6hrDox_Z008	8	460.188	0
HeLaSS22_6hrDox_Z008	9	1155.44	5
HeLaSS22_6hrDox_Z009	1	904.731	2
HeLaSS22_6hrDox_Z009	2	689.779	0
HeLaSS22_6hrDox_Z009	3	569.438	0
HeLaSS22_6hrDox_Z009	4	799.442	10
HeLaSS22_6hrDox_Z009	5	1141.72	6
HeLaSS22_6hrDox_Z009	6	517.46	12
HeLaSS22_6hrDox_Z009	7	407.868	0
HeLaSS22_6hrDox_Z009	8	399.154	0
HeLaSS22_6hrDox_Z010	1	638.178	0
HeLaSS22_6hrDox_Z010	2	716.299	1
HeLaSS22_6hrDox_Z010	3	647.613	0
HeLaSS22_6hrDox_Z010	4	608.183	0
HeLaSS22_6hrDox_Z010	5	568.412	1
HeLaSS22_6hrDox_Z010	6	427.511	0
HeLaSS22_6hrDox_Z010	7	692.299	3
HeLaSS22_6hrDox_Z010	8	829.077	6
HeLaSS22_6hrDox_Z010	9	944.233	12
HeLaSS22_6hrDox_Z010	10	883.864	18
HeLaSS22_6hrDox_Z011	1	525.184	0
HeLaSS22_6hrDox_Z011	2	611.622	0
HeLaSS22_6hrDox_Z011	3	899.492	0
HeLaSS22_6hrDox_Z011	4	601.108	0
HeLaSS22_6hrDox_Z011	5	940.056	0
HeLaSS22_6hrDox_Z011	6	927.381	3
HeLaSS22_6hrDox_Z011	7	1180.9	18
HeLaSS22_6hrDox_Z012	1	533.862	0
HeLaSS22_6hrDox_Z012	2	688.824	3
HeLaSS22_6hrDox_Z012	3	721.052	1
HeLaSS22_6hrDox_Z012	4	666.625	0
HeLaSS22_6hrDox_Z012	5	767.323	0
HeLaSS22_6hrDox_Z012	6	850.268	7
HeLaSS22_6hrDox_Z012	7	475.006	4
HeLaSS22_6hrDox_Z012	8	664.555	27

## Sheet: StammerAEA
FOV	Cell	Area	# of Puncta
HeLaSS27_6hrDox_Z001	1	563.749	1
HeLaSS27_6hrDox_Z001	2	806.896	0
HeLaSS27_6hrDox_Z001	3	785.165	1
HeLaSS27_6hrDox_Z001	4	564.379	0
HeLaSS27_6hrDox_Z001	5	552.244	0
HeLaSS27_6hrDox_Z001	6	749.103	0
HeLaSS27_6hrDox_Z001	7	597.759	0
HeLaSS27_6hrDox_Z001	8	506.982	0
HeLaSS27_6hrDox_Z002	1	775.101	1
HeLaSS27_6hrDox_Z002	2	523.996	0
HeLaSS27_6hrDox_Z002	3	897.404	0
HeLaSS27_6hrDox_Z002	4	733.709	0
HeLaSS27_6hrDox_Z002	5	907.522	2
HeLaSS27_6hrDox_Z002	6	623.577	1
HeLaSS27_6hrDox_Z002	7	1310.98	6
HeLaSS27_6hrDox_Z002	8	1265.73	29
HeLaSS27_6hrDox_Z003	1	645.794	0
HeLaSS27_6hrDox_Z003	2	547.401	0
HeLaSS27_6hrDox_Z003	3	748.887	0
HeLaSS27_6hrDox_Z003	4	869.299	0
HeLaSS27_6hrDox_Z003	5	739.254	0
HeLaSS27_6hrDox_Z003	6	710.015	1
HeLaSS27_6hrDox_Z003	7	636.738	1
HeLaSS27_6hrDox_Z003	8	1060.85	1
HeLaSS27_6hrDox_Z004	1	736.266	0
HeLaSS27_6hrDox_Z004	2	562.399	0
HeLaSS27_6hrDox_Z004	3	576.046	1
HeLaSS27_6hrDox_Z004	4	338.516	0
HeLaSS27_6hrDox_Z004	5	390.296	0
HeLaSS27_6hrDox_Z004	6	467.318	0
HeLaSS27_6hrDox_Z004	7	368.475	1
HeLaSS27_6hrDox_Z004	8	410.767	0
HeLaSS27_6hrDox_Z004	9	610.992	0
HeLaSS27_6hrDox_Z004	10	626.332	0
HeLaSS27_6hrDox_Z004	11	691.471	36
HeLaSS27_6hrDox_Z005	1	511.411	2
HeLaSS27_6hrDox_Z005	2	849.332	3
HeLaSS27_6hrDox_Z005	3	528.209	0
HeLaSS27_6hrDox_Z005	4	492.38	0
HeLaSS27_6hrDox_Z005	5	523.869	0
HeLaSS27_6hrDox_Z005	6	634.596	0
HeLaSS27_6hrDox_Z005	7	822.488	36
HeLaSS27_6hrDox_Z005	8	1042.28	40
HeLaSS27_6hrDox_Z006	1	496.017	0
HeLaSS27_6hrDox_Z006	2	431.202	0
HeLaSS27_6hrDox_Z006	3	520.521	1
HeLaSS27_6hrDox_Z006	4	520.557	1
HeLaSS27_6hrDox_Z006	5	602.728	0
HeLaSS27_6hrDox_Z006	6	713.094	1
HeLaSS27_6hrDox_Z006	7	616.717	4
HeLaSS27_6hrDox_Z006	8	1185.76	2
HeLaSS27_6hrDox_Z006	9	654.886	2
HeLaSS27_6hrDox_Z006	10	618.86	5
HeLaSS27_6hrDox_Z007	1	510.96	0
HeLaSS27_6hrDox_Z007	2	451.258	0
HeLaSS27_6hrDox_Z007	3	578.89	0
HeLaSS27_6hrDox_Z007	4	696.71	0
HeLaSS27_6hrDox_Z007	5	798.938	0
HeLaSS27_6hrDox_Z007	6	976.748	1
HeLaSS27_6hrDox_Z007	7	629.158	6
HeLaSS27_6hrDox_Z007	8	671.666	20
HeLaSS27_6hrDox_Z008	1	423.604	0
HeLaSS27_6hrDox_Z008	2	533.358	0
HeLaSS27_6hrDox_Z008	3	454.031	0
HeLaSS27_6hrDox_Z008	4	368.835	0
HeLaSS27_6hrDox_Z008	5	565.711	0
HeLaSS27_6hrDox_Z008	6	464.077	0
HeLaSS27_6hrDox_Z008	7	618.572	0
HeLaSS27_6hrDox_Z008	8	567.152	0
HeLaSS27_6hrDox_Z008	9	666.769	0
HeLaSS27_6hrDox_Z008	10	499.888	2
HeLaSS27_6hrDox_Z008	11	890.778	3
HeLaSS27_6hrDox_Z009	1	667.759	0
HeLaSS27_6hrDox_Z009	2	726.579	2
HeLaSS27_6hrDox_Z009	3	1082.76	20
HeLaSS27_6hrDox_Z009	4	1309.63	12
HeLaSS27_6hrDox_Z009	5	929.631	15
HeLaSS27_6hrDox_Z009	6	1026.12	45
HeLaSS27_6hrDox_Z009	7	824.774	57
HeLaSS27_6hrDox_Z009	8	798.848	82
HeLaSS27_6hrDox_Z010	1	869.713	0
HeLaSS27_6hrDox_Z010	2	838.152	0
HeLaSS27_6hrDox_Z010	3	625.413	0
HeLaSS27_6hrDox_Z010	4	1096.87	0
HeLaSS27_6hrDox_Z010	5	788.838	0
HeLaSS27_6hrDox_Z010	6	849.368	3
HeLaSS27_6hrDox_Z011	1	869.245	0
HeLaSS27_6hrDox_Z011	2	774.795	0
HeLaSS27_6hrDox_Z011	3	869.407	0
HeLaSS27_6hrDox_Z011	4	658.037	4
HeLaSS27_6hrDox_Z011	5	749.103	4
HeLaSS27_6hrDox_Z011	6	964.145	9
HeLaSS27_6hrDox_Z011	7	1015.21	8
HeLaSS27_6hrDox_Z012	1	892.83	0
HeLaSS27_6hrDox_Z012	2	476.554	0
HeLaSS27_6hrDox_Z012	3	640.933	0
HeLaSS27_6hrDox_Z012	4	509.16	0
HeLaSS27_6hrDox_Z012	5	749.589	0
HeLaSS27_6hrDox_Z012	6	791.341	1
HeLaSS27_6hrDox_Z012	7	863.79	5
HeLaSS27_6hrDox_Z012	8	1002.08	39
