# Supplementary material for: Condensation of LINE-1 is critical for retrotransposition
Source: eLife journal article supplement (doi:10.7554/elife.82991), 2023-04-28
Supplement: supp [file totalPunctaPerCell_maxZfindMaxima_20210520_HeLaSS0016_punctaTimepointsMultiwell_BioRep1_Prom75.xlsx]

## Sheet: Summary
0hr_PunctaPerCell	3hr_PunctaPerCell	6hr_PunctaPerCell	24hr_PunctaPerCell
0	0	0	20
0	0	0	5
0	1	0	13
0	0	0	12
0	0	0	15
0	0	0	37
0	0	1	54
0	0	21	25
0	0	26	55
0	1	10	0
0	4	69	4
0	2	0	18
0	8	0	14
0	41	0	17
0	67	4	24
0	72	2	3
0	28	10	7
0	0	7	14
0	0	14	26
0	0	18	17
3	0	33	39
0	0	36	36
0	0	45	49
0	1	64	73
0	0	59	50
0	11	56	25
0	0	40	47
1	0	0	151
0	0	0	4
0	0	1	4
0	1	8	6
0	10	0	18
0	4	6	13
0	2	0	32
1	9	11	11
0	12	14	44
0	0	24	42
0	0	19	34
0	0	26	43
0	0	1	56
0	0	5	73
0	1	2	91
0	0	0	12
0	0	1	9
0	2	2	9
0	7	3	22
0	6	12	28
0	15	28	69
0	10	29	66
0	0	48	7
0	0	1	112
0	0	1	62
0	0	10	17
0	0	1	72
0	0	17	53
0	1	20	39
0	4	17	12
0	3	27	3
0	16	0	8
0	21	2	6
0	0	1	23
1	2	8	44
1	2	13	48
0	0	8	52
0	2	7	28
0	6	0	41
1	14	7	47
0	19	8	18
0	36	10	50
0	0	10	47
0	0	15	64
0	3	27	50
0	2	24	7
0	0	0	1
0	3	4	2
0	1	6	1
0	2	11	4
0	12	12	2
0	21	15	11
0	24	33	12
0	0	3	35
0	1	10	44
0	1	12	38
0	3	13	39
0	1	8	1
0	8	24	4
0	4	17	11
0	33	33	12
0	10	55	20
0	1	0	45
0	0	8	43
0	0	14	73
0	2	9	35
0	60	13	32
0	76	33	47
0	0	42	62
0	0	72	64
0	0	28	66
0	2	32	37
0	5	0	11
1	0	0	4
0	6	8	2
0	23	6	5
0	22	17	3
0	28	56	3
0	0	72	9
0	0	151	9
0	0	2	10
0	1	1	12
0	0	8	9
0	1	24	13
0	0	12	21
0	0	80	30
0	6	56	30
0	15	9	64
0	4	1	0
0	8	1	6
0	19	0	4
0	13	0	7
1	71	0	7
0	1	0	9
0	0	0	17
0	0	27	50
0	2	3	30
0	0	0	0
0	1	0	0
0	7	0	95
0	2	0	95
0	0	1	65
0	0	4	0
0	0	5	1
0	0	9	3
0	1	15	2
0	2	13	10
0	21	9	9
0	24	20	22
0	0	30	15
0	0	40	29
0	0	0	25
0	0	0	36
0	1	11	81
0	0	17	0
0	20	59	4
0	38	61	20
0	0	0	23
0	0	4	43
0	0	6	68
0	2	9	28
0	2	13	27
0	0	52	55
0	12	0	41
0	5	0	62
0	1	1	94
0	69	0	82
1	0	4	74
0	15	13	0
0	29	13	4
0	18	33	4
0	25	30	3
0	29	0	7
0	52	2	10
0	0	1	19
0	0	2	29
0	0	11	26
0	0	31	33
0	2	19	26
0	0	13	36
0	7	18	5
0	14	53	10
0	23	0	7
0	44	0	11
0	1	2	5
1	0	1	11
0	1	2	51
0	1	3	3
0	0	9	6
0	7	0	19
0	4	14	18
0	23	0	21
0	28	1	17
0	35	0	37
	1	2	41
	0	2	42
	1	2	43
	0	100	85
	0		34
	2		9
	6		12
	0		9
	5		24
	7		4
			10
			18
			10
			32
			25
			12
			1
			5
			1
			9
			12
			17
			35
			35
			22
			19
			47
			38
			2
			2
			7
			19
			9
			29
			46
			0
			3
			1
			39
			101
			55

## Sheet: 0hr
FOV	Cell	Area	# of Puncta
0hrDox_Well1_Z001	1	249.197	0
0hrDox_Well1_Z001	2	344.547	0
0hrDox_Well1_Z001	3	452.663	0
0hrDox_Well1_Z001	4	302.975	0
0hrDox_Well1_Z001	5	493.946	0
0hrDox_Well1_Z001	6	251.357	0
0hrDox_Well1_Z001	7	635.028	0
0hrDox_Well1_Z002	1	295.54	0
0hrDox_Well1_Z002	2	488.761	0
0hrDox_Well1_Z002	3	656.219	0
0hrDox_Well1_Z002	4	438.727	0
0hrDox_Well1_Z002	5	213.296	0
0hrDox_Well1_Z002	6	431.67	0
0hrDox_Well1_Z002	7	398.722	0
0hrDox_Well1_Z002	8	240.987	0
0hrDox_Well1_Z002	9	301.409	0
0hrDox_Well1_Z002	10	278.004	0
0hrDox_Well1_Z003	1	896.953	0
0hrDox_Well1_Z003	2	445.209	0
0hrDox_Well1_Z003	3	369.771	0
0hrDox_Well1_Z003	4	186.254	3
0hrDox_Well1_Z003	5	203.61	0
0hrDox_Well1_Z003	6	132.529	0
0hrDox_Well1_Z003	7	411.487	0
0hrDox_Well1_Z003	8	541.082	0
0hrDox_Well1_Z003	9	145.636	0
0hrDox_Well1_Z004	1	339.47	0
0hrDox_Well1_Z004	2	260.575	1
0hrDox_Well1_Z004	3	263.672	0
0hrDox_Well1_Z004	4	334.807	0
0hrDox_Well1_Z004	5	245.002	0
0hrDox_Well1_Z004	6	298.798	0
0hrDox_Well1_Z004	7	378.071	0
0hrDox_Well1_Z004	8	232.939	0
0hrDox_Well1_Z004	9	242.553	1
0hrDox_Well1_Z004	10	352.523	0
0hrDox_Well1_Z004	11	399.856	0
0hrDox_Well1_Z004	12	247.54	0
0hrDox_Well1_Z005	1	366.062	0
0hrDox_Well1_Z005	2	307.188	0
0hrDox_Well1_Z005	3	378.179	0
0hrDox_Well1_Z005	4	228.132	0
0hrDox_Well1_Z005	5	296.98	0
0hrDox_Well1_Z005	6	191.709	0
0hrDox_Well1_Z005	7	208.723	0
0hrDox_Well1_Z005	8	189.081	0
0hrDox_Well1_Z005	9	635.028	0
0hrDox_Well1_Z005	10	172.445	0
0hrDox_Well1_Z005	11	294.441	0
0hrDox_Well2_Z001	1	645.47	0
0hrDox_Well2_Z001	2	540.325	0
0hrDox_Well2_Z001	3	589.747	0
0hrDox_Well2_Z001	4	437.125	0
0hrDox_Well2_Z001	5	305.478	0
0hrDox_Well2_Z002	1	347.572	0
0hrDox_Well2_Z002	2	210.902	0
0hrDox_Well2_Z002	3	189.027	0
0hrDox_Well2_Z002	4	178.908	0
0hrDox_Well2_Z002	5	149.381	0
0hrDox_Well2_Z002	6	189.765	0
0hrDox_Well2_Z002	7	224.171	0
0hrDox_Well2_Z002	8	359.347	1
0hrDox_Well2_Z002	9	627.16	1
0hrDox_Well2_Z002	10	518.09	0
0hrDox_Well2_Z002	11	967.206	0
0hrDox_Well2_Z003	1	361.507	0
0hrDox_Well2_Z003	2	433.866	1
0hrDox_Well2_Z003	3	303.768	0
0hrDox_Well2_Z003	4	504.893	0
0hrDox_Well2_Z003	5	550.228	0
0hrDox_Well2_Z003	6	540.001	0
0hrDox_Well2_Z003	7	595.418	0
0hrDox_Well2_Z003	8	247.45	0
0hrDox_Well2_Z003	9	350.255	0
0hrDox_Well2_Z003	10	173.543	0
0hrDox_Well2_Z003	11	332.412	0
0hrDox_Well2_Z003	12	406.212	0
0hrDox_Well2_Z003	13	273.268	0
0hrDox_Well2_Z004	1	407.328	0
0hrDox_Well2_Z004	2	589.207	0
0hrDox_Well2_Z004	3	495.153	0
0hrDox_Well2_Z004	4	550.57	0
0hrDox_Well2_Z004	5	199.487	0
0hrDox_Well2_Z004	6	544.52	0
0hrDox_Well2_Z004	7	511.807	0
0hrDox_Well2_Z004	8	308.161	0
0hrDox_Well2_Z004	9	267.525	0
0hrDox_Well2_Z004	10	307.567	0
0hrDox_Well2_Z004	11	304.758	0
0hrDox_Well2_Z004	12	241.725	0
0hrDox_Well2_Z005	1	270.874	0
0hrDox_Well2_Z005	2	241.779	0
0hrDox_Well2_Z005	3	152.802	0
0hrDox_Well2_Z005	4	211.73	0
0hrDox_Well2_Z005	5	434.73	0
0hrDox_Well2_Z005	6	360.661	0
0hrDox_Well2_Z005	7	289.058	0
0hrDox_Well2_Z005	8	401.261	0
0hrDox_Well2_Z005	9	377.927	0
0hrDox_Well2_Z005	10	292.497	0
0hrDox_Well2_Z005	11	466.274	1
0hrDox_Well3_Z001	1	361.309	0
0hrDox_Well3_Z001	2	836.531	0
0hrDox_Well3_Z001	3	766.207	0
0hrDox_Well3_Z001	4	1032.72	0
0hrDox_Well3_Z001	5	1039.74	0
0hrDox_Well3_Z001	6	688.446	0
0hrDox_Well3_Z002	1	454.247	0
0hrDox_Well3_Z002	2	443.463	0
0hrDox_Well3_Z002	3	288.23	0
0hrDox_Well3_Z002	4	398.182	0
0hrDox_Well3_Z002	5	337.111	0
0hrDox_Well3_Z002	6	396.579	0
0hrDox_Well3_Z002	7	300.653	0
0hrDox_Well3_Z002	8	159.013	0
0hrDox_Well3_Z003	1	592.808	0
0hrDox_Well3_Z003	2	516.686	0
0hrDox_Well3_Z003	3	372.76	0
0hrDox_Well3_Z003	4	307.008	0
0hrDox_Well3_Z003	5	263.33	1
0hrDox_Well3_Z003	6	480.677	0
0hrDox_Well3_Z003	7	454.301	0
0hrDox_Well3_Z004	1	411.271	0
0hrDox_Well3_Z004	2	350.993	0
0hrDox_Well3_Z004	3	378.575	0
0hrDox_Well3_Z004	4	390.152	0
0hrDox_Well3_Z004	5	233.497	0
0hrDox_Well3_Z004	6	237.368	0
0hrDox_Well3_Z004	7	347.5	0
0hrDox_Well3_Z004	8	351.173	0
0hrDox_Well3_Z004	9	523.383	0
0hrDox_Well3_Z004	10	694.73	0
0hrDox_Well3_Z005	1	204.816	0
0hrDox_Well3_Z005	2	318.909	0
0hrDox_Well3_Z005	3	357.42	0
0hrDox_Well3_Z005	4	227.988	0
0hrDox_Well3_Z005	5	347.986	0
0hrDox_Well3_Z005	6	410.353	0
0hrDox_Well3_Z005	7	437.179	0
0hrDox_Well3_Z005	8	288.806	0
0hrDox_Well3_Z005	9	459.648	0
0hrDox_Well3_Z005	10	272.422	0
0hrDox_Well3_Z005	11	175.073	0
0hrDox_Well3_Z005	12	254.364	0
0hrDox_Well3_Z005	13	201.576	0
0hrDox_Well3_Z005	14	229.878	0
0hrDox_Well4_Z001	1	648.531	0
0hrDox_Well4_Z001	2	395.895	0
0hrDox_Well4_Z001	3	227.664	0
0hrDox_Well4_Z001	4	285.907	0
0hrDox_Well4_Z001	5	328.721	0
0hrDox_Well4_Z002	1	285.475	0
0hrDox_Well4_Z002	2	269.001	0
0hrDox_Well4_Z002	3	344.889	0
0hrDox_Well4_Z002	4	267.147	1
0hrDox_Well4_Z002	5	354.053	0
0hrDox_Well4_Z002	6	423.334	0
0hrDox_Well4_Z002	7	499.186	0
0hrDox_Well4_Z003	1	688.878	0
0hrDox_Well4_Z003	2	541.946	0
0hrDox_Well4_Z003	3	364.874	0
0hrDox_Well4_Z003	4	292.335	0
0hrDox_Well4_Z003	5	185.462	0
0hrDox_Well4_Z003	6	431.562	0
0hrDox_Well4_Z003	7	350.525	0
0hrDox_Well4_Z003	8	257.281	0
0hrDox_Well4_Z003	9	297.25	0
0hrDox_Well4_Z003	10	304.578	0
0hrDox_Well4_Z003	11	391.808	0
0hrDox_Well4_Z004	1	358.429	0
0hrDox_Well4_Z004	2	559.986	0
0hrDox_Well4_Z004	3	659.676	0
0hrDox_Well4_Z004	4	634.254	1
0hrDox_Well4_Z004	5	1052.92	0
0hrDox_Well4_Z004	6	820.057	0
0hrDox_Well4_Z005	1	679.66	0
0hrDox_Well4_Z005	2	351.749	0
0hrDox_Well4_Z005	3	508.296	0
0hrDox_Well4_Z005	4	596.247	0
0hrDox_Well4_Z005	5	745.214	0
0hrDox_Well4_Z005	6	361.237	0

## Sheet: 3hr
FOV	Cell	Area	# of Puncta
3hrDox_Well1_Z001	1	251.123	0
3hrDox_Well1_Z001	2	259.675	0
3hrDox_Well1_Z001	3	191.583	1
3hrDox_Well1_Z001	4	278.958	0
3hrDox_Well1_Z001	5	150.606	0
3hrDox_Well1_Z001	6	173.327	0
3hrDox_Well1_Z001	7	169.816	0
3hrDox_Well1_Z001	8	210.92	0
3hrDox_Well1_Z001	9	193.762	0
3hrDox_Well1_Z001	10	260.431	1
3hrDox_Well1_Z001	11	263.978	4
3hrDox_Well1_Z001	12	264.104	2
3hrDox_Well1_Z001	13	350.201	8
3hrDox_Well1_Z001	14	331.836	41
3hrDox_Well1_Z001	15	251.015	67
3hrDox_Well1_Z001	16	425.53	72
3hrDox_Well1_Z001	17	271.18	28
3hrDox_Well1_Z002	1	463.915	0
3hrDox_Well1_Z002	2	365.54	0
3hrDox_Well1_Z002	3	289.22	0
3hrDox_Well1_Z002	4	240.339	0
3hrDox_Well1_Z002	5	282.883	0
3hrDox_Well1_Z002	6	225.611	0
3hrDox_Well1_Z002	7	265.671	1
3hrDox_Well1_Z002	8	280.02	0
3hrDox_Well1_Z002	9	535.392	11
3hrDox_Well1_Z003	1	232.129	0
3hrDox_Well1_Z003	2	251.303	0
3hrDox_Well1_Z003	3	258.559	0
3hrDox_Well1_Z003	4	418.509	0
3hrDox_Well1_Z003	5	365.468	1
3hrDox_Well1_Z003	6	694.262	10
3hrDox_Well1_Z003	7	469.137	4
3hrDox_Well1_Z003	8	373.57	2
3hrDox_Well1_Z003	9	205.987	9
3hrDox_Well1_Z003	10	673.719	12
3hrDox_Well1_Z004	1	136.436	0
3hrDox_Well1_Z004	2	236	0
3hrDox_Well1_Z004	3	224.261	0
3hrDox_Well1_Z004	4	327.749	0
3hrDox_Well1_Z004	5	287.798	0
3hrDox_Well1_Z004	6	423.118	1
3hrDox_Well1_Z004	7	187.73	0
3hrDox_Well1_Z004	8	215.025	0
3hrDox_Well1_Z004	9	202.962	2
3hrDox_Well1_Z004	10	468.308	7
3hrDox_Well1_Z004	11	323.374	6
3hrDox_Well1_Z004	12	474.286	15
3hrDox_Well1_Z004	13	308.215	10
3hrDox_Well1_Z005	1	184.471	0
3hrDox_Well1_Z005	2	136.4	0
3hrDox_Well1_Z005	3	152.946	0
3hrDox_Well1_Z005	4	348.22	0
3hrDox_Well1_Z005	5	380.448	0
3hrDox_Well1_Z005	6	361.543	0
3hrDox_Well1_Z005	7	623.505	1
3hrDox_Well1_Z005	8	269.65	4
3hrDox_Well1_Z005	9	471.045	3
3hrDox_Well1_Z005	10	481.56	16
3hrDox_Well1_Z005	11	740.01	21
3hrDox_Well2_Z001	1	301.139	0
3hrDox_Well2_Z001	2	258.127	2
3hrDox_Well2_Z001	3	210.128	2
3hrDox_Well2_Z001	4	332.88	0
3hrDox_Well2_Z001	5	253.41	2
3hrDox_Well2_Z001	6	603.412	6
3hrDox_Well2_Z001	7	589.675	14
3hrDox_Well2_Z001	8	518.72	19
3hrDox_Well2_Z001	9	485.827	36
3hrDox_Well2_Z002	1	211.514	0
3hrDox_Well2_Z002	2	163.371	0
3hrDox_Well2_Z002	3	322.42	3
3hrDox_Well2_Z002	4	184.399	2
3hrDox_Well2_Z002	5	209.209	0
3hrDox_Well2_Z002	6	260.791	3
3hrDox_Well2_Z002	7	337.093	1
3hrDox_Well2_Z002	8	224.225	2
3hrDox_Well2_Z002	9	501.94	12
3hrDox_Well2_Z002	10	369.825	21
3hrDox_Well2_Z002	11	466.652	24
3hrDox_Well2_Z003	1	330.036	0
3hrDox_Well2_Z003	2	473.494	1
3hrDox_Well2_Z003	3	332.25	1
3hrDox_Well2_Z003	4	606.887	3
3hrDox_Well2_Z003	5	362.84	1
3hrDox_Well2_Z003	6	475.168	8
3hrDox_Well2_Z003	7	377.423	4
3hrDox_Well2_Z003	8	636.81	33
3hrDox_Well2_Z003	9	264.806	10
3hrDox_Well2_Z004	1	214.232	1
3hrDox_Well2_Z004	2	570.446	0
3hrDox_Well2_Z004	3	449.656	0
3hrDox_Well2_Z004	4	502.606	2
3hrDox_Well2_Z004	5	334.645	60
3hrDox_Well2_Z004	6	521.637	76
3hrDox_Well2_Z005	1	185.318	0
3hrDox_Well2_Z005	2	228.852	0
3hrDox_Well2_Z005	3	205.662	0
3hrDox_Well2_Z005	4	319.071	2
3hrDox_Well2_Z005	5	287.78	5
3hrDox_Well2_Z005	6	334.519	0
3hrDox_Well2_Z005	7	295.954	6
3hrDox_Well2_Z005	8	325.103	23
3hrDox_Well2_Z005	9	571.761	22
3hrDox_Well2_Z005	10	312.824	28
3hrDox_Well3_Z001	1	256.632	0
3hrDox_Well3_Z001	2	229.302	0
3hrDox_Well3_Z001	3	308.107	0
3hrDox_Well3_Z001	4	177.414	1
3hrDox_Well3_Z001	5	265.599	0
3hrDox_Well3_Z001	6	260.179	1
3hrDox_Well3_Z001	7	766.855	0
3hrDox_Well3_Z001	8	768.475	0
3hrDox_Well3_Z001	9	611.91	6
3hrDox_Well3_Z001	10	479.147	15
3hrDox_Well3_Z002	1	400	4
3hrDox_Well3_Z002	2	458.046	8
3hrDox_Well3_Z002	3	723.032	19
3hrDox_Well3_Z002	4	449.08	13
3hrDox_Well3_Z002	5	885.989	71
3hrDox_Well3_Z003	1	213.332	1
3hrDox_Well3_Z003	2	253.338	0
3hrDox_Well3_Z003	3	329.55	0
3hrDox_Well3_Z003	4	185.12	2
3hrDox_Well3_Z003	5	157.933	0
3hrDox_Well3_Z003	6	357.96	1
3hrDox_Well3_Z003	7	406.896	7
3hrDox_Well3_Z003	8	565.549	2
3hrDox_Well3_Z004	1	377.639	0
3hrDox_Well3_Z004	2	400	0
3hrDox_Well3_Z004	3	181.375	0
3hrDox_Well3_Z004	4	395.283	0
3hrDox_Well3_Z004	5	521.205	1
3hrDox_Well3_Z004	6	237.098	2
3hrDox_Well3_Z004	7	445.731	21
3hrDox_Well3_Z004	8	320.728	24
3hrDox_Well3_Z005	1	346.15	0
3hrDox_Well3_Z005	2	115.821	0
3hrDox_Well3_Z005	3	97.565	0
3hrDox_Well3_Z005	4	305.496	0
3hrDox_Well3_Z005	5	182.041	1
3hrDox_Well3_Z005	6	356.394	0
3hrDox_Well3_Z005	7	429.959	20
3hrDox_Well3_Z005	8	473.98	38
3hrDox_Well4_Z001	1	320.926	0
3hrDox_Well4_Z001	2	310.195	0
3hrDox_Well4_Z001	3	355.926	0
3hrDox_Well4_Z001	4	325.319	2
3hrDox_Well4_Z001	5	368.349	2
3hrDox_Well4_Z001	6	135.284	0
3hrDox_Well4_Z001	7	353.639	12
3hrDox_Well4_Z001	8	687.474	5
3hrDox_Well4_Z001	9	195.688	1
3hrDox_Well4_Z001	10	333.115	69
3hrDox_Well4_Z002	1	288.158	0
3hrDox_Well4_Z002	2	215.025	15
3hrDox_Well4_Z002	3	395.319	29
3hrDox_Well4_Z002	4	446.001	18
3hrDox_Well4_Z002	5	305.748	25
3hrDox_Well4_Z002	6	264.896	29
3hrDox_Well4_Z002	7	833.254	52
3hrDox_Well4_Z003	1	252.275	0
3hrDox_Well4_Z003	2	345.501	0
3hrDox_Well4_Z003	3	304.488	0
3hrDox_Well4_Z003	4	345.591	0
3hrDox_Well4_Z003	5	278.202	2
3hrDox_Well4_Z003	6	222.118	0
3hrDox_Well4_Z003	7	345.267	7
3hrDox_Well4_Z003	8	204.942	14
3hrDox_Well4_Z003	9	633.029	23
3hrDox_Well4_Z003	10	756.844	44
3hrDox_Well4_Z004	1	251.501	1
3hrDox_Well4_Z004	2	217.581	0
3hrDox_Well4_Z004	3	194.23	1
3hrDox_Well4_Z004	4	261.332	1
3hrDox_Well4_Z004	5	127.56	0
3hrDox_Well4_Z004	6	414.962	7
3hrDox_Well4_Z004	7	495.261	4
3hrDox_Well4_Z004	8	793.321	23
3hrDox_Well4_Z004	9	405.798	28
3hrDox_Well4_Z004	10	348.004	35
3hrDox_Well4_Z005	1	358.915	1
3hrDox_Well4_Z005	2	239.402	0
3hrDox_Well4_Z005	3	173.183	1
3hrDox_Well4_Z005	4	249.647	0
3hrDox_Well4_Z005	5	189.261	0
3hrDox_Well4_Z005	6	252.762	2
3hrDox_Well4_Z005	7	621.597	6
3hrDox_Well4_Z005	8	411.091	0
3hrDox_Well4_Z005	9	690.571	5
3hrDox_Well4_Z005	10	555.035	7

## Sheet: 6hr
FOV	Cell	Area	# of Puncta
6hrDox_Well1_Z001	1	174.335	0
6hrDox_Well1_Z001	2	230.688	0
6hrDox_Well1_Z001	3	585.516	0
6hrDox_Well1_Z001	4	371.139	0
6hrDox_Well1_Z001	5	432.03	0
6hrDox_Well1_Z001	6	345.267	0
6hrDox_Well1_Z001	7	231.084	1
6hrDox_Well1_Z001	8	258.793	21
6hrDox_Well1_Z001	9	200.693	26
6hrDox_Well1_Z001	10	402.251	10
6hrDox_Well1_Z001	11	275.753	69
6hrDox_Well1_Z002	1	256.002	0
6hrDox_Well1_Z002	2	289.832	0
6hrDox_Well1_Z002	3	224.981	0
6hrDox_Well1_Z002	4	325.175	4
6hrDox_Well1_Z002	5	347.032	2
6hrDox_Well1_Z002	6	292.353	10
6hrDox_Well1_Z002	7	364.046	7
6hrDox_Well1_Z002	8	211.73	14
6hrDox_Well1_Z002	9	291.633	18
6hrDox_Well1_Z002	10	437.935	33
6hrDox_Well1_Z002	11	285.349	36
6hrDox_Well1_Z002	12	389.936	45
6hrDox_Well1_Z002	13	494.144	64
6hrDox_Well1_Z002	14	303.101	59
6hrDox_Well1_Z002	15	206.149	56
6hrDox_Well1_Z002	16	186.722	40
6hrDox_Well1_Z003	1	312.032	0
6hrDox_Well1_Z003	2	208.273	0
6hrDox_Well1_Z003	3	316.281	1
6hrDox_Well1_Z003	4	404.447	8
6hrDox_Well1_Z003	5	178.494	0
6hrDox_Well1_Z003	6	469.083	6
6hrDox_Well1_Z003	7	335.293	0
6hrDox_Well1_Z003	8	489.697	11
6hrDox_Well1_Z003	9	605.195	14
6hrDox_Well1_Z003	10	587.857	24
6hrDox_Well1_Z003	11	185.192	19
6hrDox_Well1_Z003	12	331.854	26
6hrDox_Well1_Z004	1	209.335	1
6hrDox_Well1_Z004	2	218.085	5
6hrDox_Well1_Z004	3	199.379	2
6hrDox_Well1_Z004	4	347.554	0
6hrDox_Well1_Z004	5	444.075	1
6hrDox_Well1_Z004	6	328.757	2
6hrDox_Well1_Z004	7	128.622	3
6hrDox_Well1_Z004	8	217.023	12
6hrDox_Well1_Z004	9	413.035	28
6hrDox_Well1_Z004	10	329.046	29
6hrDox_Well1_Z004	11	421.083	48
6hrDox_Well1_Z005	1	529.559	1
6hrDox_Well1_Z005	2	429.635	1
6hrDox_Well1_Z005	3	360.427	10
6hrDox_Well1_Z005	4	938.831	1
6hrDox_Well1_Z005	5	726.615	17
6hrDox_Well1_Z005	6	479.327	20
6hrDox_Well1_Z005	7	343.359	17
6hrDox_Well1_Z005	8	349.246	27
6hrDox_Well2_Z001	1	325.571	0
6hrDox_Well2_Z001	2	199.613	2
6hrDox_Well2_Z001	3	541.064	1
6hrDox_Well2_Z001	4	454.265	8
6hrDox_Well2_Z001	5	261.386	13
6hrDox_Well2_Z001	6	236.306	8
6hrDox_Well2_Z001	7	408.462	7
6hrDox_Well2_Z002	1	601.18	0
6hrDox_Well2_Z002	2	542.54	7
6hrDox_Well2_Z002	3	428.429	8
6hrDox_Well2_Z002	4	295.09	10
6hrDox_Well2_Z002	5	388.153	10
6hrDox_Well2_Z002	6	403.961	15
6hrDox_Well2_Z002	7	373.498	27
6hrDox_Well2_Z002	8	331.26	24
6hrDox_Well2_Z003	1	239.889	0
6hrDox_Well2_Z003	2	463.177	4
6hrDox_Well2_Z003	3	507.36	6
6hrDox_Well2_Z003	4	499.978	11
6hrDox_Well2_Z003	5	247.576	12
6hrDox_Well2_Z003	6	425.188	15
6hrDox_Well2_Z003	7	570.789	33
6hrDox_Well2_Z004	1	476.932	3
6hrDox_Well2_Z004	2	372.94	10
6hrDox_Well2_Z004	3	278.094	12
6hrDox_Well2_Z004	4	404.285	13
6hrDox_Well2_Z004	5	358.969	8
6hrDox_Well2_Z004	6	391.538	24
6hrDox_Well2_Z004	7	420.939	17
6hrDox_Well2_Z004	8	421.425	33
6hrDox_Well2_Z004	9	393.159	55
6hrDox_Well2_Z005	1	443.445	0
6hrDox_Well2_Z005	2	617.167	8
6hrDox_Well2_Z005	3	440.042	14
6hrDox_Well2_Z005	4	738.966	9
6hrDox_Well2_Z005	5	559.158	13
6hrDox_Well2_Z005	6	855.4	33
6hrDox_Well2_Z005	7	437.827	42
6hrDox_Well2_Z005	8	431.076	72
6hrDox_Well2_Z005	9	221.902	28
6hrDox_Well2_Z005	10	220.732	32
6hrDox_Well3_Z001	1	269.704	0
6hrDox_Well3_Z001	2	396.471	0
6hrDox_Well3_Z001	3	243.813	8
6hrDox_Well3_Z001	4	397.102	6
6hrDox_Well3_Z001	5	438.385	17
6hrDox_Well3_Z001	6	699.951	56
6hrDox_Well3_Z001	7	582.455	72
6hrDox_Well3_Z001	8	1057.1	151
6hrDox_Well3_Z002	1	496.341	2
6hrDox_Well3_Z002	2	173.525	1
6hrDox_Well3_Z002	3	415.196	8
6hrDox_Well3_Z002	4	517.316	24
6hrDox_Well3_Z002	5	265.581	12
6hrDox_Well3_Z002	6	523.815	80
6hrDox_Well3_Z002	7	654.166	56
6hrDox_Well3_Z003	1	407.886	9
6hrDox_Well3_Z003	2	250.961	1
6hrDox_Well3_Z003	3	317.307	1
6hrDox_Well3_Z003	4	255.102	0
6hrDox_Well3_Z003	5	291.111	0
6hrDox_Well3_Z003	6	333.871	0
6hrDox_Well3_Z003	7	309.349	0
6hrDox_Well3_Z003	8	341.793	0
6hrDox_Well3_Z003	9	289.436	27
6hrDox_Well3_Z003	10	212.054	3
6hrDox_Well3_Z004	1	227.736	0
6hrDox_Well3_Z004	2	248.351	0
6hrDox_Well3_Z004	3	371.68	0
6hrDox_Well3_Z004	4	283.045	0
6hrDox_Well3_Z004	5	237.908	1
6hrDox_Well3_Z004	6	379.601	4
6hrDox_Well3_Z004	7	319.917	5
6hrDox_Well3_Z004	8	428.069	9
6hrDox_Well3_Z004	9	413.143	15
6hrDox_Well3_Z004	10	327.101	13
6hrDox_Well3_Z004	11	441.464	9
6hrDox_Well3_Z004	12	344.529	20
6hrDox_Well3_Z004	13	330.63	30
6hrDox_Well3_Z004	14	545.979	40
6hrDox_Well3_Z004	15	161.192	0
6hrDox_Well3_Z005	1	344.223	0
6hrDox_Well3_Z005	2	280.47	11
6hrDox_Well3_Z005	3	471.747	17
6hrDox_Well3_Z005	4	428.843	59
6hrDox_Well3_Z005	5	560.598	61
6hrDox_Well4_Z001	1	515.624	0
6hrDox_Well4_Z001	2	375.659	4
6hrDox_Well4_Z001	3	719.324	6
6hrDox_Well4_Z001	4	522.213	9
6hrDox_Well4_Z001	5	542.36	13
6hrDox_Well4_Z001	6	554.945	52
6hrDox_Well4_Z002	1	491.372	0
6hrDox_Well4_Z002	2	272.962	0
6hrDox_Well4_Z002	3	319.575	1
6hrDox_Well4_Z002	4	200.639	0
6hrDox_Well4_Z002	5	334.375	4
6hrDox_Well4_Z002	6	282.343	13
6hrDox_Well4_Z002	7	322.024	13
6hrDox_Well4_Z002	8	758.843	33
6hrDox_Well4_Z002	9	358.627	30
6hrDox_Well4_Z003	1	233.893	0
6hrDox_Well4_Z003	2	212.936	2
6hrDox_Well4_Z003	3	552.784	1
6hrDox_Well4_Z003	4	485.664	2
6hrDox_Well4_Z003	5	474.448	11
6hrDox_Well4_Z003	6	459.72	31
6hrDox_Well4_Z003	7	369.231	19
6hrDox_Well4_Z003	8	334.717	13
6hrDox_Well4_Z003	9	342.747	18
6hrDox_Well4_Z003	10	320.512	53
6hrDox_Well4_Z004	1	330.018	0
6hrDox_Well4_Z004	2	351.425	0
6hrDox_Well4_Z004	3	317.469	2
6hrDox_Well4_Z004	4	462.277	1
6hrDox_Well4_Z004	5	427.637	2
6hrDox_Well4_Z004	6	418.509	3
6hrDox_Well4_Z004	7	723.465	9
6hrDox_Well4_Z004	8	682.505	0
6hrDox_Well4_Z004	9	426.809	14
6hrDox_Well4_Z005	1	331.368	0
6hrDox_Well4_Z005	2	271.162	1
6hrDox_Well4_Z005	3	350.957	0
6hrDox_Well4_Z005	4	405.564	2
6hrDox_Well4_Z005	5	618.572	2
6hrDox_Well4_Z005	6	1288.46	2
6hrDox_Well4_Z005	7	842.275	100

## Sheet: 24hr
FOV	Cell	Area	# of Puncta
24hrDox_Well1_Z001	1	415.502	20
24hrDox_Well1_Z001	2	477.202	5
24hrDox_Well1_Z001	3	344.871	13
24hrDox_Well1_Z001	4	598.659	12
24hrDox_Well1_Z001	5	874.178	15
24hrDox_Well1_Z001	6	674.997	37
24hrDox_Well1_Z001	7	449.242	54
24hrDox_Well1_Z001	8	240.789	25
24hrDox_Well1_Z001	9	605.177	55
24hrDox_Well1_Z002	1	329.784	0
24hrDox_Well1_Z002	2	374.668	4
24hrDox_Well1_Z002	3	339.074	18
24hrDox_Well1_Z002	4	273.016	14
24hrDox_Well1_Z002	5	324.22	17
24hrDox_Well1_Z002	6	526.624	24
24hrDox_Well1_Z002	7	271.342	3
24hrDox_Well1_Z002	8	406.446	7
24hrDox_Well1_Z002	9	395.499	14
24hrDox_Well1_Z002	10	287.312	26
24hrDox_Well1_Z002	11	301.103	17
24hrDox_Well1_Z002	12	441.446	39
24hrDox_Well1_Z002	13	486.565	36
24hrDox_Well1_Z002	14	225.809	49
24hrDox_Well1_Z002	15	432.246	73
24hrDox_Well1_Z002	16	276.167	50
24hrDox_Well1_Z002	17	312.518	25
24hrDox_Well1_Z002	18	299.447	47
24hrDox_Well1_Z002	19	788.856	151
24hrDox_Well1_Z003	1	260.215	4
24hrDox_Well1_Z003	2	302.075	4
24hrDox_Well1_Z003	3	294.045	6
24hrDox_Well1_Z003	4	302.363	18
24hrDox_Well1_Z003	5	677.158	13
24hrDox_Well1_Z003	6	355.278	32
24hrDox_Well1_Z003	7	289.85	11
24hrDox_Well1_Z003	8	578.224	44
24hrDox_Well1_Z003	9	416.438	42
24hrDox_Well1_Z003	10	318.351	34
24hrDox_Well1_Z003	11	549.814	43
24hrDox_Well1_Z003	12	369.195	56
24hrDox_Well1_Z003	13	420.399	73
24hrDox_Well1_Z003	14	361.813	91
24hrDox_Well1_Z003	15	232.957	12
24hrDox_Well1_Z004	1	371.103	9
24hrDox_Well1_Z004	2	415.16	9
24hrDox_Well1_Z004	3	588.523	22
24hrDox_Well1_Z004	4	522.429	28
24hrDox_Well1_Z004	5	470.073	69
24hrDox_Well1_Z004	6	496.773	66
24hrDox_Well1_Z004	7	246.892	7
24hrDox_Well1_Z004	8	638.448	112
24hrDox_Well1_Z004	9	314.876	62
24hrDox_Well1_Z005	1	368.097	17
24hrDox_Well1_Z005	2	440.384	72
24hrDox_Well1_Z005	3	298.186	53
24hrDox_Well1_Z005	4	653.464	39
24hrDox_Well2_Z001	1	159.572	12
24hrDox_Well2_Z001	2	89.589	3
24hrDox_Well2_Z001	3	179.232	8
24hrDox_Well2_Z001	4	221.92	6
24hrDox_Well2_Z001	5	241.239	23
24hrDox_Well2_Z001	6	477.671	44
24hrDox_Well2_Z001	7	300.509	48
24hrDox_Well2_Z001	8	233.695	52
24hrDox_Well2_Z001	9	326.543	28
24hrDox_Well2_Z001	10	363.452	41
24hrDox_Well2_Z001	11	649.611	47
24hrDox_Well2_Z001	12	266.589	18
24hrDox_Well2_Z001	13	346.186	50
24hrDox_Well2_Z001	14	308.089	47
24hrDox_Well2_Z001	15	423.676	64
24hrDox_Well2_Z001	16	246.676	50
24hrDox_Well2_Z002	1	516.938	7
24hrDox_Well2_Z002	2	279.012	1
24hrDox_Well2_Z002	3	521.403	2
24hrDox_Well2_Z002	4	520.737	1
24hrDox_Well2_Z002	5	530.369	4
24hrDox_Well2_Z002	6	258.883	2
24hrDox_Well2_Z002	7	395.949	11
24hrDox_Well2_Z002	8	403.781	12
24hrDox_Well2_Z002	9	519.494	35
24hrDox_Well2_Z002	10	415.862	44
24hrDox_Well2_Z002	11	359.491	38
24hrDox_Well2_Z002	12	456.246	39
24hrDox_Well2_Z003	1	289.922	1
24hrDox_Well2_Z003	2	232.831	4
24hrDox_Well2_Z003	3	600.712	11
24hrDox_Well2_Z003	4	464.473	12
24hrDox_Well2_Z003	5	435.487	20
24hrDox_Well2_Z003	6	532.962	45
24hrDox_Well2_Z003	7	335.077	43
24hrDox_Well2_Z003	8	574.011	73
24hrDox_Well2_Z003	9	475.492	35
24hrDox_Well2_Z003	10	360.085	32
24hrDox_Well2_Z003	11	382.68	47
24hrDox_Well2_Z003	12	482.352	62
24hrDox_Well2_Z003	13	484.008	64
24hrDox_Well2_Z003	14	585.138	66
24hrDox_Well2_Z003	15	224.729	37
24hrDox_Well2_Z003	16	134.546	11
24hrDox_Well2_Z004	1	488.041	4
24hrDox_Well2_Z004	2	514.651	2
24hrDox_Well2_Z004	3	340.55	5
24hrDox_Well2_Z004	4	410.011	3
24hrDox_Well2_Z004	5	335.815	3
24hrDox_Well2_Z004	6	352.181	9
24hrDox_Well2_Z004	7	511.158	9
24hrDox_Well2_Z004	8	347.14	10
24hrDox_Well2_Z004	9	380.106	12
24hrDox_Well2_Z004	10	147.383	9
24hrDox_Well2_Z004	11	155.341	13
24hrDox_Well2_Z004	12	756.88	21
24hrDox_Well2_Z004	13	551.65	30
24hrDox_Well2_Z004	14	529.451	30
24hrDox_Well2_Z004	15	450.556	64
24hrDox_Well2_Z005	1	351.191	0
24hrDox_Well2_Z005	2	509.034	6
24hrDox_Well2_Z005	3	357.618	4
24hrDox_Well2_Z005	4	696.134	7
24hrDox_Well2_Z005	5	540.703	7
24hrDox_Well2_Z005	6	447.549	9
24hrDox_Well2_Z005	7	486.817	17
24hrDox_Well2_Z005	8	486.763	50
24hrDox_Well2_Z005	9	392.402	30
24hrDox_Well2_Z005	10	200.315	0
24hrDox_Well2_Z005	11	238.448	0
24hrDox_Well2_Z005	12	593.366	95
24hrDox_Well2_Z005	13	471.315	95
24hrDox_Well2_Z005	14	688.302	65
24hrDox_Well3_Z001	1	405.618	0
24hrDox_Well3_Z001	2	553.126	1
24hrDox_Well3_Z001	3	576.28	3
24hrDox_Well3_Z001	4	542.378	2
24hrDox_Well3_Z001	5	262.124	10
24hrDox_Well3_Z001	6	516.29	9
24hrDox_Well3_Z001	7	590.899	22
24hrDox_Well3_Z001	8	263.582	15
24hrDox_Well3_Z001	9	529.505	29
24hrDox_Well3_Z001	10	422.938	25
24hrDox_Well3_Z001	11	803.637	36
24hrDox_Well3_Z001	12	544.592	81
24hrDox_Well3_Z002	1	272.206	0
24hrDox_Well3_Z002	2	405.276	4
24hrDox_Well3_Z002	3	214.196	20
24hrDox_Well3_Z002	4	783.635	23
24hrDox_Well3_Z002	5	366.638	43
24hrDox_Well3_Z002	6	408.102	68
24hrDox_Well3_Z002	7	403.835	28
24hrDox_Well3_Z002	8	469.227	27
24hrDox_Well3_Z002	9	485.899	55
24hrDox_Well3_Z002	10	280.038	41
24hrDox_Well3_Z002	11	327.875	62
24hrDox_Well3_Z002	12	616.141	94
24hrDox_Well3_Z002	13	425.494	82
24hrDox_Well3_Z002	14	440.996	74
24hrDox_Well3_Z003	1	170.986	0
24hrDox_Well3_Z003	2	249.179	4
24hrDox_Well3_Z003	3	282.108	4
24hrDox_Well3_Z003	4	458.496	3
24hrDox_Well3_Z003	5	563.659	7
24hrDox_Well3_Z003	6	202.584	10
24hrDox_Well3_Z003	7	678.022	19
24hrDox_Well3_Z003	8	350.723	29
24hrDox_Well3_Z003	9	550.102	26
24hrDox_Well3_Z003	10	486.763	33
24hrDox_Well3_Z003	11	417.77	26
24hrDox_Well3_Z003	12	315.686	36
24hrDox_Well3_Z004	1	955.665	5
24hrDox_Well3_Z004	2	689.004	10
24hrDox_Well3_Z004	3	641.095	7
24hrDox_Well3_Z004	4	868.525	11
24hrDox_Well3_Z004	5	883	5
24hrDox_Well3_Z004	6	714.606	11
24hrDox_Well3_Z004	7	568.772	51
24hrDox_Well3_Z005	1	612.504	3
24hrDox_Well3_Z005	2	639.763	6
24hrDox_Well3_Z005	3	477.653	19
24hrDox_Well3_Z005	4	514.147	18
24hrDox_Well3_Z005	5	764.622	21
24hrDox_Well3_Z005	6	528.028	17
24hrDox_Well3_Z005	7	560.562	37
24hrDox_Well3_Z005	8	478.715	41
24hrDox_Well3_Z005	9	492.776	42
24hrDox_Well3_Z005	10	212.918	43
24hrDox_Well3_Z005	11	463.411	85
24hrDox_Well3_Z005	12	1001.18	34
24hrDox_Well4_Z002	1	298.33	9
24hrDox_Well4_Z002	2	362.155	12
24hrDox_Well4_Z002	3	517.622	9
24hrDox_Well4_Z002	4	657.821	24
24hrDox_Well4_Z002	5	365.522	4
24hrDox_Well4_Z002	6	549.796	10
24hrDox_Well4_Z002	7	779.71	18
24hrDox_Well4_Z002	8	623.469	10
24hrDox_Well4_Z002	9	687.006	32
24hrDox_Well4_Z002	10	340.784	25
24hrDox_Well4_Z003	1	488.149	12
24hrDox_Well4_Z003	2	306.864	1
24hrDox_Well4_Z003	3	237.008	5
24hrDox_Well4_Z003	4	462.583	1
24hrDox_Well4_Z003	5	370.581	9
24hrDox_Well4_Z003	6	544.934	12
24hrDox_Well4_Z003	7	378.233	17
24hrDox_Well4_Z003	8	460.278	35
24hrDox_Well4_Z003	9	442.904	35
24hrDox_Well4_Z003	10	331.53	22
24hrDox_Well4_Z003	11	456.138	19
24hrDox_Well4_Z003	12	343.089	47
24hrDox_Well4_Z003	13	269.65	38
24hrDox_Well4_Z004	1	364.334	2
24hrDox_Well4_Z004	2	376.091	2
24hrDox_Well4_Z004	3	586.074	7
24hrDox_Well4_Z004	4	428.195	19
24hrDox_Well4_Z004	5	667.957	9
24hrDox_Well4_Z004	6	538.345	29
24hrDox_Well4_Z004	7	474.178	46
24hrDox_Well4_Z005	1	752.811	0
24hrDox_Well4_Z005	2	1080.97	3
24hrDox_Well4_Z005	3	737.238	1
24hrDox_Well4_Z005	4	1343.32	39
24hrDox_Well4_Z005	5	1028.44	101
24hrDox_Well4_Z005	6	792.619	55
