# Supplementary material for: Condensation of LINE-1 is critical for retrotransposition
Source: eLife journal article supplement (doi:10.7554/elife.82991), 2023-04-28
Supplement: supp [file totalPunctaPerCell_maxZfindMaxima_20210905_HeLaORF1mut_punctaImaging_rep1_Prom75.xlsx]

## Sheet: Summary
WT_PunctaPerCell	K3AK4A_PunctaPerCell	R261A_PunctaPerCell
14	0	0
4	0	0
2	1	0
10	1	0
3	1	0
9	0	0
29	1	0
1	0	0
2	0	0
0	0	0
4	0	0
11	0	0
2	1	0
0	0	0
2	0	3
15	0	0
8	0	0
8	0	0
0	0	1
2	0	0
18	0	0
17	11	0
39	0	0
23	0	0
29	0	0
21	0	0
0	0	1
0	3	0
6	1	0
11	1	1
1	0	0
9	0	0
7	0	0
3	0	0
5	0	1
9	0	0
14	0	0
23	0	0
0	0	0
0	0	0
7	0	0
82	0	0
67	2	0
30	7	0
21	2	3
0	2	0
0	0	0
0	0	0
3	1	0
0	1	0
0	2	0
13	7	0
68	13	1
0	0	0
0	0	0
0	1	1
1	0	7
0	1	1
0	0	10
6	0	0
13	8	1
0	1	3
5	3	5
0	7	7
10	4	0
44	0	0
21	1	0
30	2	0
31	2	0
37	0	0
3	0	0
14	2	0
11	1	0
0	6	0
4	2	0
0	0	0
0	1	0
0	1	0
3	0	0
	0	0
	3	0
	14	0
	1	0
	0	0
	1	0
	2	0
	0	0
	3	1
	0

## Sheet: WT
FOV	Cell	Area	# of Puncta
HeLaSS16_6hrDox_Z001	1	1479.84	14
HeLaSS16_6hrDox_Z001	2	509.844	4
HeLaSS16_6hrDox_Z001	3	521.781	2
HeLaSS16_6hrDox_Z001	4	695.468	10
HeLaSS16_6hrDox_Z001	5	554.585	3
HeLaSS16_6hrDox_Z001	6	631.481	9
HeLaSS16_6hrDox_Z001	7	519.386	29
HeLaSS16_6hrDox_Z002	1	747.158	1
HeLaSS16_6hrDox_Z002	2	1060.22	2
HeLaSS16_6hrDox_Z002	3	1122.91	0
HeLaSS16_6hrDox_Z002	4	499.672	4
HeLaSS16_6hrDox_Z002	5	590.233	11
HeLaSS16_6hrDox_Z002	6	659.171	2
HeLaSS16_6hrDox_Z003	1	681.281	0
HeLaSS16_6hrDox_Z003	2	926.769	2
HeLaSS16_6hrDox_Z003	3	1651.66	15
HeLaSS16_6hrDox_Z003	4	621.237	8
HeLaSS16_6hrDox_Z003	5	771.032	8
HeLaSS16_6hrDox_Z004	1	1059.87	0
HeLaSS16_6hrDox_Z004	2	238.718	2
HeLaSS16_6hrDox_Z004	3	502.462	18
HeLaSS16_6hrDox_Z004	4	560.832	17
HeLaSS16_6hrDox_Z004	5	536.599	39
HeLaSS16_6hrDox_Z004	6	779.836	23
HeLaSS16_6hrDox_Z004	7	1306.17	29
HeLaSS16_6hrDox_Z004	8	772.94	21
HeLaSS16_6hrDox_Z005	1	776.451	0
HeLaSS16_6hrDox_Z005	2	598.659	0
HeLaSS16_6hrDox_Z005	3	542.828	6
HeLaSS16_6hrDox_Z005	4	690.913	11
HeLaSS16_6hrDox_Z005	5	333.943	1
HeLaSS16_6hrDox_Z006	1	508.638	9
HeLaSS16_6hrDox_Z006	2	625.72	7
HeLaSS16_6hrDox_Z006	3	428.843	3
HeLaSS16_6hrDox_Z006	4	563.137	5
HeLaSS16_6hrDox_Z006	5	398.488	9
HeLaSS16_6hrDox_Z006	6	568.61	14
HeLaSS16_6hrDox_Z006	7	917.1	23
HeLaSS16_6hrDox_Z007	1	903.849	0
HeLaSS16_6hrDox_Z007	2	788.478	0
HeLaSS16_6hrDox_Z007	3	511.429	7
HeLaSS16_6hrDox_Z007	4	1843.4	82
HeLaSS16_6hrDox_Z007	5	1190.78	67
HeLaSS16_6hrDox_Z007	6	1183.42	30
HeLaSS16_6hrDox_Z007	7	761.22	21
HeLaSS16_6hrDox_Z008	1	1463.17	0
HeLaSS16_6hrDox_Z008	2	476.446	0
HeLaSS16_6hrDox_Z008	3	611.478	0
HeLaSS16_6hrDox_Z008	4	1150.36	3
HeLaSS16_6hrDox_Z008	5	886.421	0
HeLaSS16_6hrDox_Z008	6	519.296	0
HeLaSS16_6hrDox_Z008	7	801.603	13
HeLaSS16_6hrDox_Z008	8	1405.75	68
HeLaSS16_6hrDox_Z009	1	1089.02	0
HeLaSS16_6hrDox_Z009	2	1379.36	0
HeLaSS16_6hrDox_Z009	3	1637.83	0
HeLaSS16_6hrDox_Z009	4	1547.91	1
HeLaSS16_6hrDox_Z010	1	644.084	0
HeLaSS16_6hrDox_Z010	2	635.154	0
HeLaSS16_6hrDox_Z010	3	976.982	6
HeLaSS16_6hrDox_Z010	4	750.345	13
HeLaSS16_6hrDox_Z010	5	447.045	0
HeLaSS16_6hrDox_Z010	6	801.387	5
HeLaSS16_6hrDox_Z010	7	387.901	0
HeLaSS16_6hrDox_Z010	8	1063.4	10
HeLaSS16_6hrDox_Z010	9	543.908	44
HeLaSS16_6hrDox_Z011	1	1059.17	21
HeLaSS16_6hrDox_Z011	2	1158.91	30
HeLaSS16_6hrDox_Z011	3	918.217	31
HeLaSS16_6hrDox_Z011	4	1149.91	37
HeLaSS16_6hrDox_Z011	5	577.702	3
HeLaSS16_6hrDox_Z012	1	595.544	14
HeLaSS16_6hrDox_Z012	2	470.901	11
HeLaSS16_6hrDox_Z012	3	315.452	0
HeLaSS16_6hrDox_Z012	4	485.827	4
HeLaSS16_6hrDox_Z012	5	357.6	0
HeLaSS16_6hrDox_Z012	6	578.981	0
HeLaSS16_6hrDox_Z012	7	1725.24	0
HeLaSS16_6hrDox_Z012	8	798.758	3

## Sheet: K3AK4A
FOV	Cell	Area	# of Puncta
HeLaSS23_6hrDox_Z001	1	555.917	0
HeLaSS23_6hrDox_Z001	2	468.272	0
HeLaSS23_6hrDox_Z001	3	435.901	1
HeLaSS23_6hrDox_Z001	4	665.149	1
HeLaSS23_6hrDox_Z001	5	489.211	1
HeLaSS23_6hrDox_Z001	6	394.311	0
HeLaSS23_6hrDox_Z001	7	297.556	1
HeLaSS23_6hrDox_Z001	8	374.776	0
HeLaSS23_6hrDox_Z002	1	708.485	0
HeLaSS23_6hrDox_Z002	2	490.31	0
HeLaSS23_6hrDox_Z002	3	455.723	0
HeLaSS23_6hrDox_Z002	4	537.013	0
HeLaSS23_6hrDox_Z002	5	1763.17	1
HeLaSS23_6hrDox_Z002	6	1000.96	0
HeLaSS23_6hrDox_Z003	1	333.727	0
HeLaSS23_6hrDox_Z003	2	228.51	0
HeLaSS23_6hrDox_Z003	3	616.465	0
HeLaSS23_6hrDox_Z003	4	561.282	0
HeLaSS23_6hrDox_Z003	5	432.138	0
HeLaSS23_6hrDox_Z003	6	450.79	0
HeLaSS23_6hrDox_Z003	7	420.669	0
HeLaSS23_6hrDox_Z003	8	1440.56	11
HeLaSS23_6hrDox_Z004	1	403.331	0
HeLaSS23_6hrDox_Z004	2	390.26	0
HeLaSS23_6hrDox_Z004	3	487.861	0
HeLaSS23_6hrDox_Z004	4	707.117	0
HeLaSS23_6hrDox_Z004	5	654.706	0
HeLaSS23_6hrDox_Z004	6	666.661	3
HeLaSS23_6hrDox_Z004	7	564.289	1
HeLaSS23_6hrDox_Z005	1	483.054	1
HeLaSS23_6hrDox_Z005	2	511.483	0
HeLaSS23_6hrDox_Z005	3	603.25	0
HeLaSS23_6hrDox_Z005	4	497.367	0
HeLaSS23_6hrDox_Z005	5	875.618	0
HeLaSS23_6hrDox_Z005	6	886.295	0
HeLaSS23_6hrDox_Z005	7	993.24	0
HeLaSS23_6hrDox_Z005	8	765.613	0
HeLaSS23_6hrDox_Z006	1	440.078	0
HeLaSS23_6hrDox_Z006	2	388.496	0
HeLaSS23_6hrDox_Z006	3	642.211	0
HeLaSS23_6hrDox_Z006	4	595.202	0
HeLaSS23_6hrDox_Z006	5	484.134	0
HeLaSS23_6hrDox_Z006	6	659.928	2
HeLaSS23_6hrDox_Z006	7	342.117	7
HeLaSS23_6hrDox_Z006	8	470.001	2
HeLaSS23_6hrDox_Z007	1	530.441	2
HeLaSS23_6hrDox_Z007	2	426.683	0
HeLaSS23_6hrDox_Z007	3	404.735	0
HeLaSS23_6hrDox_Z007	4	615.655	1
HeLaSS23_6hrDox_Z007	5	753.694	1
HeLaSS23_6hrDox_Z007	6	580.511	2
HeLaSS23_6hrDox_Z007	7	658.163	7
HeLaSS23_6hrDox_Z007	8	709.313	13
HeLaSS23_6hrDox_Z008	1	566.774	0
HeLaSS23_6hrDox_Z008	2	487.843	0
HeLaSS23_6hrDox_Z008	3	458.37	1
HeLaSS23_6hrDox_Z008	4	403.277	0
HeLaSS23_6hrDox_Z008	5	812.892	1
HeLaSS23_6hrDox_Z008	6	548.913	0
HeLaSS23_6hrDox_Z008	7	812.784	0
HeLaSS23_6hrDox_Z008	8	732.359	8
HeLaSS23_6hrDox_Z009	1	831.67	1
HeLaSS23_6hrDox_Z009	2	869.317	3
HeLaSS23_6hrDox_Z009	3	530.909	7
HeLaSS23_6hrDox_Z009	4	686.988	4
HeLaSS23_6hrDox_Z009	5	449.116	0
HeLaSS23_6hrDox_Z009	6	877.131	1
HeLaSS23_6hrDox_Z009	7	426.935	2
HeLaSS23_6hrDox_Z009	8	314.696	2
HeLaSS23_6hrDox_Z010	1	595.815	0
HeLaSS23_6hrDox_Z010	2	169.834	0
HeLaSS23_6hrDox_Z010	3	304.218	2
HeLaSS23_6hrDox_Z010	4	651.088	1
HeLaSS23_6hrDox_Z010	5	926.462	6
HeLaSS23_6hrDox_Z010	6	825.513	2
HeLaSS23_6hrDox_Z011	1	1008.2	0
HeLaSS23_6hrDox_Z011	2	581.267	1
HeLaSS23_6hrDox_Z011	3	504.101	1
HeLaSS23_6hrDox_Z011	4	345.88	0
HeLaSS23_6hrDox_Z011	5	259.405	0
HeLaSS23_6hrDox_Z011	6	934.762	3
HeLaSS23_6hrDox_Z011	7	1358.42	14
HeLaSS23_6hrDox_Z012	1	916.65	1
HeLaSS23_6hrDox_Z012	2	1013.12	0
HeLaSS23_6hrDox_Z012	3	831.148	1
HeLaSS23_6hrDox_Z012	4	689.131	2
HeLaSS23_6hrDox_Z012	5	412.531	0
HeLaSS23_6hrDox_Z012	6	826.971	3
HeLaSS23_6hrDox_Z012	7	814.602	0

## Sheet: R261A
FOV	Cell	Area	# of Puncta
HeLaSS24_6hrDox_Z001	1	630.203	0
HeLaSS24_6hrDox_Z001	2	328.776	0
HeLaSS24_6hrDox_Z001	3	537.967	0
HeLaSS24_6hrDox_Z001	4	255.12	0
HeLaSS24_6hrDox_Z001	5	422.506	0
HeLaSS24_6hrDox_Z001	6	409.002	0
HeLaSS24_6hrDox_Z001	7	443.823	0
HeLaSS24_6hrDox_Z001	8	567.458	0
HeLaSS24_6hrDox_Z001	9	1327.08	0
HeLaSS24_6hrDox_Z001	10	576.19	0
HeLaSS24_6hrDox_Z002	1	1021.25	0
HeLaSS24_6hrDox_Z002	2	472.954	0
HeLaSS24_6hrDox_Z002	3	530.063	0
HeLaSS24_6hrDox_Z002	4	1143.74	0
HeLaSS24_6hrDox_Z002	5	900.572	3
HeLaSS24_6hrDox_Z003	1	986.237	0
HeLaSS24_6hrDox_Z003	2	823.766	0
HeLaSS24_6hrDox_Z003	3	978.099	0
HeLaSS24_6hrDox_Z003	4	657.281	1
HeLaSS24_6hrDox_Z003	5	506.045	0
HeLaSS24_6hrDox_Z004	1	775.623	0
HeLaSS24_6hrDox_Z004	2	852.123	0
HeLaSS24_6hrDox_Z004	3	886.925	0
HeLaSS24_6hrDox_Z004	4	940.866	0
HeLaSS24_6hrDox_Z004	5	670.352	0
HeLaSS24_6hrDox_Z004	6	587.587	0
HeLaSS24_6hrDox_Z004	7	660.828	1
HeLaSS24_6hrDox_Z004	8	957.16	0
HeLaSS24_6hrDox_Z005	1	647.325	0
HeLaSS24_6hrDox_Z005	2	676.78	1
HeLaSS24_6hrDox_Z005	3	752.415	0
HeLaSS24_6hrDox_Z005	4	443.175	0
HeLaSS24_6hrDox_Z005	5	678.994	0
HeLaSS24_6hrDox_Z005	6	857.524	0
HeLaSS24_6hrDox_Z005	7	1069.69	1
HeLaSS24_6hrDox_Z006	1	668.246	0
HeLaSS24_6hrDox_Z006	2	594.302	0
HeLaSS24_6hrDox_Z006	3	524.68	0
HeLaSS24_6hrDox_Z006	4	500.518	0
HeLaSS24_6hrDox_Z006	5	815.808	0
HeLaSS24_6hrDox_Z006	6	439.034	0
HeLaSS24_6hrDox_Z006	7	614.863	0
HeLaSS24_6hrDox_Z006	8	603.736	0
HeLaSS24_6hrDox_Z006	9	734.213	0
HeLaSS24_6hrDox_Z006	10	642.77	3
HeLaSS24_6hrDox_Z007	1	802.323	0
HeLaSS24_6hrDox_Z007	2	840.726	0
HeLaSS24_6hrDox_Z007	3	793.735	0
HeLaSS24_6hrDox_Z007	4	1385.05	0
HeLaSS24_6hrDox_Z007	5	614.593	0
HeLaSS24_6hrDox_Z008	1	764.406	0
HeLaSS24_6hrDox_Z008	2	660.99	0
HeLaSS24_6hrDox_Z008	3	491.48	1
HeLaSS24_6hrDox_Z008	4	780.232	0
HeLaSS24_6hrDox_Z008	5	393.267	0
HeLaSS24_6hrDox_Z008	6	632.579	1
HeLaSS24_6hrDox_Z008	7	904.911	7
HeLaSS24_6hrDox_Z008	8	547.941	1
HeLaSS24_6hrDox_Z008	9	713.94	10
HeLaSS24_6hrDox_Z009	1	672.098	0
HeLaSS24_6hrDox_Z009	2	1184.19	1
HeLaSS24_6hrDox_Z009	3	1135.29	3
HeLaSS24_6hrDox_Z009	4	754.27	5
HeLaSS24_6hrDox_Z009	5	679.012	7
HeLaSS24_6hrDox_Z010	1	388.424	0
HeLaSS24_6hrDox_Z010	2	505.379	0
HeLaSS24_6hrDox_Z010	3	380.754	0
HeLaSS24_6hrDox_Z010	4	477.725	0
HeLaSS24_6hrDox_Z010	5	470.667	0
HeLaSS24_6hrDox_Z010	6	456.084	0
HeLaSS24_6hrDox_Z010	7	405.492	0
HeLaSS24_6hrDox_Z010	8	456.732	0
HeLaSS24_6hrDox_Z011	1	708.971	0
HeLaSS24_6hrDox_Z011	2	699.087	0
HeLaSS24_6hrDox_Z011	3	841.861	0
HeLaSS24_6hrDox_Z011	4	556.655	0
HeLaSS24_6hrDox_Z011	5	369.591	0
HeLaSS24_6hrDox_Z011	6	540.938	0
HeLaSS24_6hrDox_Z011	7	640.915	0
HeLaSS24_6hrDox_Z011	8	673.917	0
HeLaSS24_6hrDox_Z011	9	798.146	0
HeLaSS24_6hrDox_Z012	1	647.397	0
HeLaSS24_6hrDox_Z012	2	580.457	0
HeLaSS24_6hrDox_Z012	3	952.425	0
HeLaSS24_6hrDox_Z012	4	438.799	0
HeLaSS24_6hrDox_Z012	5	622.263	0
HeLaSS24_6hrDox_Z012	6	853.761	0
HeLaSS24_6hrDox_Z012	7	711.294	1
