# Supplementary material for: Condensation of LINE-1 is critical for retrotransposition
Source: eLife journal article supplement (doi:10.7554/elife.82991), 2023-04-28
Supplement: supp [file totalPunctaPerCell_maxZfindMaxima_20210905_HeLaORF1mut_punctaImaging_rep1_Prom75.xlsx]

## Sheet: Summary
WT_PunctaPerCell	StammerDel_PunctaPerCell	StammerAAA_PunctaPerCell	StammerAEA_PunctaPerCell
14	0	0	0
4	0	0	1
2	0	5	1
10	0	16	0
3	0	19	0
9	7	1	0
29	11	0	0
1	0	0	2
2	0	0	0
0	0	0	0
4	0	2	0
11	0	44	0
2	0	1	0
0	0	2	1
2	7	0	0
15	0	0	52
8	0	0	0
8	0	0	0
0	0	0	0
2	0	54	14
18	0	61	50
17	0	0	0
39	0	1	0
23	1	2	1
29	0	0	0
21	0	0	0
0	0	2	0
0	0	7	2
6	0	0	0
11	0	5	0
1	0	2	0
9	0	0	0
7	0	0	0
3	0	0	3
5	0	0	0
9	0	0	1
14	0	5	25
23	0	14	17
0	0	1	0
0	0	0	1
7	0	1	0
82	0	1	0
67	0	2	42
30	1	8	1
21	4	15	0
0	7	0	10
0	0	0	2
0	0	19	28
3	0	11	33
0	0	17	0
0	0	59	0
13	0	1	0
68	0	0	4
0	0	0	0
0	0	1	0
0	0	0	58
1	1	1	0
0	0	5	0
0	0	113	0
6	0	2	0
13	0	0	0
0	0	0	4
5	1	5	2
0	0	2	1
10	0	19	0
44	0	14	2
21	0	6	7
30	1	8	5
31	5	53	20
37	4	0	0
3	0	1	0
14	0	0	0
11	0	1	0
0	0	0	1
4	1	0	28
0	0	2	0
0	0	13	0
0	0	89	0
3	0	0	1
	0	4	0
	0	6	3
	0	4
	0	11
	0	16
	0	13
	0	0
	0	0
	0	2
	0	0
	0	0
	0	16
	0	16
	0	4
	0	7
	0
	0

## Sheet: WT
FOV	Cell	Area	# of Puncta
HeLaSS16_6hrDox_Z001	1	1479.84	14
HeLaSS16_6hrDox_Z001	2	509.844	4
HeLaSS16_6hrDox_Z001	3	521.781	2
HeLaSS16_6hrDox_Z001	4	695.468	10
HeLaSS16_6hrDox_Z001	5	554.585	3
HeLaSS16_6hrDox_Z001	6	631.481	9
HeLaSS16_6hrDox_Z001	7	519.386	29
HeLaSS16_6hrDox_Z002	1	747.158	1
HeLaSS16_6hrDox_Z002	2	1060.22	2
HeLaSS16_6hrDox_Z002	3	1122.91	0
HeLaSS16_6hrDox_Z002	4	499.672	4
HeLaSS16_6hrDox_Z002	5	590.233	11
HeLaSS16_6hrDox_Z002	6	659.171	2
HeLaSS16_6hrDox_Z003	1	681.281	0
HeLaSS16_6hrDox_Z003	2	926.769	2
HeLaSS16_6hrDox_Z003	3	1651.66	15
HeLaSS16_6hrDox_Z003	4	621.237	8
HeLaSS16_6hrDox_Z003	5	771.032	8
HeLaSS16_6hrDox_Z004	1	1059.87	0
HeLaSS16_6hrDox_Z004	2	238.718	2
HeLaSS16_6hrDox_Z004	3	502.462	18
HeLaSS16_6hrDox_Z004	4	560.832	17
HeLaSS16_6hrDox_Z004	5	536.599	39
HeLaSS16_6hrDox_Z004	6	779.836	23
HeLaSS16_6hrDox_Z004	7	1306.17	29
HeLaSS16_6hrDox_Z004	8	772.94	21
HeLaSS16_6hrDox_Z005	1	776.451	0
HeLaSS16_6hrDox_Z005	2	598.659	0
HeLaSS16_6hrDox_Z005	3	542.828	6
HeLaSS16_6hrDox_Z005	4	690.913	11
HeLaSS16_6hrDox_Z005	5	333.943	1
HeLaSS16_6hrDox_Z006	1	508.638	9
HeLaSS16_6hrDox_Z006	2	625.72	7
HeLaSS16_6hrDox_Z006	3	428.843	3
HeLaSS16_6hrDox_Z006	4	563.137	5
HeLaSS16_6hrDox_Z006	5	398.488	9
HeLaSS16_6hrDox_Z006	6	568.61	14
HeLaSS16_6hrDox_Z006	7	917.1	23
HeLaSS16_6hrDox_Z007	1	903.849	0
HeLaSS16_6hrDox_Z007	2	788.478	0
HeLaSS16_6hrDox_Z007	3	511.429	7
HeLaSS16_6hrDox_Z007	4	1843.4	82
HeLaSS16_6hrDox_Z007	5	1190.78	67
HeLaSS16_6hrDox_Z007	6	1183.42	30
HeLaSS16_6hrDox_Z007	7	761.22	21
HeLaSS16_6hrDox_Z008	1	1463.17	0
HeLaSS16_6hrDox_Z008	2	476.446	0
HeLaSS16_6hrDox_Z008	3	611.478	0
HeLaSS16_6hrDox_Z008	4	1150.36	3
HeLaSS16_6hrDox_Z008	5	886.421	0
HeLaSS16_6hrDox_Z008	6	519.296	0
HeLaSS16_6hrDox_Z008	7	801.603	13
HeLaSS16_6hrDox_Z008	8	1405.75	68
HeLaSS16_6hrDox_Z009	1	1089.02	0
HeLaSS16_6hrDox_Z009	2	1379.36	0
HeLaSS16_6hrDox_Z009	3	1637.83	0
HeLaSS16_6hrDox_Z009	4	1547.91	1
HeLaSS16_6hrDox_Z010	1	644.084	0
HeLaSS16_6hrDox_Z010	2	635.154	0
HeLaSS16_6hrDox_Z010	3	976.982	6
HeLaSS16_6hrDox_Z010	4	750.345	13
HeLaSS16_6hrDox_Z010	5	447.045	0
HeLaSS16_6hrDox_Z010	6	801.387	5
HeLaSS16_6hrDox_Z010	7	387.901	0
HeLaSS16_6hrDox_Z010	8	1063.4	10
HeLaSS16_6hrDox_Z010	9	543.908	44
HeLaSS16_6hrDox_Z011	1	1059.17	21
HeLaSS16_6hrDox_Z011	2	1158.91	30
HeLaSS16_6hrDox_Z011	3	918.217	31
HeLaSS16_6hrDox_Z011	4	1149.91	37
HeLaSS16_6hrDox_Z011	5	577.702	3
HeLaSS16_6hrDox_Z012	1	595.544	14
HeLaSS16_6hrDox_Z012	2	470.901	11
HeLaSS16_6hrDox_Z012	3	315.452	0
HeLaSS16_6hrDox_Z012	4	485.827	4
HeLaSS16_6hrDox_Z012	5	357.6	0
HeLaSS16_6hrDox_Z012	6	578.981	0
HeLaSS16_6hrDox_Z012	7	1725.24	0
HeLaSS16_6hrDox_Z012	8	798.758	3

## Sheet: StammerDel
FOV	Cell	Area	# of Puncta
HeLaSS21_6hrDox_Z001	1	575.65	0
HeLaSS21_6hrDox_Z001	2	737.094	0
HeLaSS21_6hrDox_Z001	3	865.41	0
HeLaSS21_6hrDox_Z001	4	889.086	0
HeLaSS21_6hrDox_Z001	5	501.508	0
HeLaSS21_6hrDox_Z001	6	678.598	7
HeLaSS21_6hrDox_Z001	7	767.449	11
HeLaSS21_6hrDox_Z002	1	296.224	0
HeLaSS21_6hrDox_Z002	2	372.688	0
HeLaSS21_6hrDox_Z002	3	313.976	0
HeLaSS21_6hrDox_Z002	4	558.708	0
HeLaSS21_6hrDox_Z002	5	653.59	0
HeLaSS21_6hrDox_Z002	6	969.997	0
HeLaSS21_6hrDox_Z002	7	573.417	0
HeLaSS21_6hrDox_Z002	8	1396.98	7
HeLaSS21_6hrDox_Z003	1	635.658	0
HeLaSS21_6hrDox_Z003	2	709.475	0
HeLaSS21_6hrDox_Z003	3	661.098	0
HeLaSS21_6hrDox_Z003	4	281.208	0
HeLaSS21_6hrDox_Z003	5	243.687	0
HeLaSS21_6hrDox_Z003	6	508.908	0
HeLaSS21_6hrDox_Z003	7	665.419	0
HeLaSS21_6hrDox_Z003	8	770.186	0
HeLaSS21_6hrDox_Z003	9	799.947	1
HeLaSS21_6hrDox_Z004	1	502.733	0
HeLaSS21_6hrDox_Z004	2	676.51	0
HeLaSS21_6hrDox_Z004	3	540.992	0
HeLaSS21_6hrDox_Z004	4	569.906	0
HeLaSS21_6hrDox_Z004	5	754.306	0
HeLaSS21_6hrDox_Z004	6	826.575	0
HeLaSS21_6hrDox_Z004	7	594.194	0
HeLaSS21_6hrDox_Z004	8	711.42	0
HeLaSS21_6hrDox_Z005	1	621.255	0
HeLaSS21_6hrDox_Z005	2	555.719	0
HeLaSS21_6hrDox_Z005	3	686.25	0
HeLaSS21_6hrDox_Z005	4	594.5	0
HeLaSS21_6hrDox_Z005	5	601.864	0
HeLaSS21_6hrDox_Z005	6	523.257	0
HeLaSS21_6hrDox_Z005	7	559.968	0
HeLaSS21_6hrDox_Z005	8	440.564	0
HeLaSS21_6hrDox_Z005	9	435.937	0
HeLaSS21_6hrDox_Z005	10	292.497	0
HeLaSS21_6hrDox_Z005	11	427.349	0
HeLaSS21_6hrDox_Z005	12	400.108	1
HeLaSS21_6hrDox_Z005	13	856.732	4
HeLaSS21_6hrDox_Z005	14	718.91	7
HeLaSS21_6hrDox_Z006	1	721.412	0
HeLaSS21_6hrDox_Z006	2	759.491	0
HeLaSS21_6hrDox_Z006	3	748.959	0
HeLaSS21_6hrDox_Z006	4	1188.73	0
HeLaSS21_6hrDox_Z006	5	811.235	0
HeLaSS21_6hrDox_Z006	6	1193.68	0
HeLaSS21_6hrDox_Z007	1	904.857	0
HeLaSS21_6hrDox_Z007	2	1561.09	0
HeLaSS21_6hrDox_Z007	3	1078.72	0
HeLaSS21_6hrDox_Z007	4	994.555	0
HeLaSS21_6hrDox_Z007	5	993.798	1
HeLaSS21_6hrDox_Z008	1	529.217	0
HeLaSS21_6hrDox_Z008	2	555.161	0
HeLaSS21_6hrDox_Z008	3	722.582	0
HeLaSS21_6hrDox_Z008	4	1026.3	0
HeLaSS21_6hrDox_Z008	5	1431.1	0
HeLaSS21_6hrDox_Z008	6	1922.49	1
HeLaSS21_6hrDox_Z009	1	665.941	0
HeLaSS21_6hrDox_Z009	2	592.61	0
HeLaSS21_6hrDox_Z009	3	537.571	0
HeLaSS21_6hrDox_Z009	4	763.56	0
HeLaSS21_6hrDox_Z009	5	722.96	1
HeLaSS21_6hrDox_Z009	6	1432.92	5
HeLaSS21_6hrDox_Z009	7	658.235	4
HeLaSS21_6hrDox_Z010	1	548.031	0
HeLaSS21_6hrDox_Z010	2	441.824	0
HeLaSS21_6hrDox_Z010	3	452.555	0
HeLaSS21_6hrDox_Z010	4	819.445	0
HeLaSS21_6hrDox_Z010	5	601.342	1
HeLaSS21_6hrDox_Z010	6	619.472	0
HeLaSS21_6hrDox_Z010	7	736.932	0
HeLaSS21_6hrDox_Z010	8	1432.99	0
HeLaSS21_6hrDox_Z011	1	439.916	0
HeLaSS21_6hrDox_Z011	2	503.669	0
HeLaSS21_6hrDox_Z011	3	837.395	0
HeLaSS21_6hrDox_Z011	4	506.189	0
HeLaSS21_6hrDox_Z011	5	547.437	0
HeLaSS21_6hrDox_Z011	6	379.133	0
HeLaSS21_6hrDox_Z011	7	314.534	0
HeLaSS21_6hrDox_Z011	8	418.041	0
HeLaSS21_6hrDox_Z011	9	446.541	0
HeLaSS21_6hrDox_Z011	10	527.939	0
HeLaSS21_6hrDox_Z011	11	369.465	0
HeLaSS21_6hrDox_Z012	1	455.525	0
HeLaSS21_6hrDox_Z012	2	456.588	0
HeLaSS21_6hrDox_Z012	3	467.984	0
HeLaSS21_6hrDox_Z012	4	643.238	0
HeLaSS21_6hrDox_Z012	5	779.692	0
HeLaSS21_6hrDox_Z012	6	892.326	0
HeLaSS21_6hrDox_Z012	7	771.824	0

## Sheet: StammerAAA
FOV	Cell	Area	# of Puncta
HeLaSS22_6hrDox_Z001	1	692.299	0
HeLaSS22_6hrDox_Z001	2	945.619	0
HeLaSS22_6hrDox_Z001	3	859.829	5
HeLaSS22_6hrDox_Z001	4	1417.22	16
HeLaSS22_6hrDox_Z001	5	853.833	19
HeLaSS22_6hrDox_Z001	6	795.752	1
HeLaSS22_6hrDox_Z002	1	1259.47	0
HeLaSS22_6hrDox_Z002	2	827.385	0
HeLaSS22_6hrDox_Z002	3	640.969	0
HeLaSS22_6hrDox_Z002	4	865.914	0
HeLaSS22_6hrDox_Z002	5	947.725	2
HeLaSS22_6hrDox_Z002	6	1018.57	44
HeLaSS22_6hrDox_Z003	1	522.807	1
HeLaSS22_6hrDox_Z003	2	510.87	2
HeLaSS22_6hrDox_Z003	3	569.69	0
HeLaSS22_6hrDox_Z003	4	505.397	0
HeLaSS22_6hrDox_Z003	5	401.819	0
HeLaSS22_6hrDox_Z003	6	733.763	0
HeLaSS22_6hrDox_Z003	7	451.24	0
HeLaSS22_6hrDox_Z003	8	582.005	54
HeLaSS22_6hrDox_Z003	9	435.253	61
HeLaSS22_6hrDox_Z004	1	366.963	0
HeLaSS22_6hrDox_Z004	2	586.164	1
HeLaSS22_6hrDox_Z004	3	622.857	2
HeLaSS22_6hrDox_Z004	4	1149.98	0
HeLaSS22_6hrDox_Z004	5	631.517	0
HeLaSS22_6hrDox_Z004	6	359.923	2
HeLaSS22_6hrDox_Z004	7	502.39	7
HeLaSS22_6hrDox_Z004	8	441.77	0
HeLaSS22_6hrDox_Z004	9	499.114	5
HeLaSS22_6hrDox_Z004	10	578.728	2
HeLaSS22_6hrDox_Z005	1	604.114	0
HeLaSS22_6hrDox_Z005	2	421.371	0
HeLaSS22_6hrDox_Z005	3	561.678	0
HeLaSS22_6hrDox_Z005	4	530.963	0
HeLaSS22_6hrDox_Z005	5	695.702	0
HeLaSS22_6hrDox_Z005	6	640.033	5
HeLaSS22_6hrDox_Z005	7	1174.56	14
HeLaSS22_6hrDox_Z006	1	763.794	1
HeLaSS22_6hrDox_Z006	2	852.141	0
HeLaSS22_6hrDox_Z006	3	706.703	1
HeLaSS22_6hrDox_Z006	4	760.193	1
HeLaSS22_6hrDox_Z006	5	502.715	2
HeLaSS22_6hrDox_Z006	6	636.018	8
HeLaSS22_6hrDox_Z006	7	1825.25	15
HeLaSS22_6hrDox_Z007	1	730	0
HeLaSS22_6hrDox_Z007	2	601.18	0
HeLaSS22_6hrDox_Z007	3	1005.01	19
HeLaSS22_6hrDox_Z007	4	698.187	11
HeLaSS22_6hrDox_Z007	5	664.411	17
HeLaSS22_6hrDox_Z007	6	827.043	59
HeLaSS22_6hrDox_Z008	1	691.399	1
HeLaSS22_6hrDox_Z008	2	467.48	0
HeLaSS22_6hrDox_Z008	3	547.779	0
HeLaSS22_6hrDox_Z008	4	365.54	1
HeLaSS22_6hrDox_Z008	5	762.336	0
HeLaSS22_6hrDox_Z008	6	842.437	1
HeLaSS22_6hrDox_Z008	7	749.697	5
HeLaSS22_6hrDox_Z008	8	1056.06	113
HeLaSS22_6hrDox_Z009	1	807.13	2
HeLaSS22_6hrDox_Z009	2	867.355	0
HeLaSS22_6hrDox_Z009	3	634.254	0
HeLaSS22_6hrDox_Z009	4	864.654	5
HeLaSS22_6hrDox_Z009	5	515.894	2
HeLaSS22_6hrDox_Z009	6	568.7	19
HeLaSS22_6hrDox_Z009	7	626.764	14
HeLaSS22_6hrDox_Z009	8	757.115	6
HeLaSS22_6hrDox_Z009	9	817.555	8
HeLaSS22_6hrDox_Z009	10	1153.14	53
HeLaSS22_6hrDox_Z010	1	695.936	0
HeLaSS22_6hrDox_Z010	2	574.876	1
HeLaSS22_6hrDox_Z010	3	697.394	0
HeLaSS22_6hrDox_Z010	4	747.77	1
HeLaSS22_6hrDox_Z010	5	473.71	0
HeLaSS22_6hrDox_Z010	6	492.74	0
HeLaSS22_6hrDox_Z010	7	534.726	2
HeLaSS22_6hrDox_Z010	8	857.542	13
HeLaSS22_6hrDox_Z010	9	1048.49	89
HeLaSS22_6hrDox_Z011	1	648.801	0
HeLaSS22_6hrDox_Z011	2	938.471	4
HeLaSS22_6hrDox_Z011	3	966.558	6
HeLaSS22_6hrDox_Z011	4	1026.85	4
HeLaSS22_6hrDox_Z011	5	775.047	11
HeLaSS22_6hrDox_Z011	6	548.139	16
HeLaSS22_6hrDox_Z011	7	534.492	13
HeLaSS22_6hrDox_Z012	1	573.921	0
HeLaSS22_6hrDox_Z012	2	506.982	0
HeLaSS22_6hrDox_Z012	3	411.343	2
HeLaSS22_6hrDox_Z012	4	443.499	0
HeLaSS22_6hrDox_Z012	5	938.939	0
HeLaSS22_6hrDox_Z012	6	838.71	16
HeLaSS22_6hrDox_Z012	7	501.454	16
HeLaSS22_6hrDox_Z012	8	446.091	4
HeLaSS22_6hrDox_Z012	9	449.674	7

## Sheet: StammerAEA
FOV	Cell	Area	# of Puncta
HeLaSS27_6hrDox_Z001	1	609.876	0
HeLaSS27_6hrDox_Z001	2	460.351	1
HeLaSS27_6hrDox_Z001	3	597.831	1
HeLaSS27_6hrDox_Z001	4	606.041	0
HeLaSS27_6hrDox_Z001	5	617.528	0
HeLaSS27_6hrDox_Z001	6	582.833	0
HeLaSS27_6hrDox_Z001	7	849.818	0
HeLaSS27_6hrDox_Z002	1	992.628	2
HeLaSS27_6hrDox_Z002	2	682.487	0
HeLaSS27_6hrDox_Z002	3	434.136	0
HeLaSS27_6hrDox_Z002	4	562.237	0
HeLaSS27_6hrDox_Z002	5	777.027	0
HeLaSS27_6hrDox_Z002	6	656.093	0
HeLaSS27_6hrDox_Z002	7	636.936	1
HeLaSS27_6hrDox_Z002	8	1069.54	0
HeLaSS27_6hrDox_Z002	9	1134.12	52
HeLaSS27_6hrDox_Z003	1	572.427	0
HeLaSS27_6hrDox_Z003	2	382.644	0
HeLaSS27_6hrDox_Z003	3	937.175	0
HeLaSS27_6hrDox_Z003	4	704.056	14
HeLaSS27_6hrDox_Z003	5	921.133	50
HeLaSS27_6hrDox_Z004	1	458.442	0
HeLaSS27_6hrDox_Z004	2	575.308	0
HeLaSS27_6hrDox_Z004	3	557.7	1
HeLaSS27_6hrDox_Z004	4	464.257	0
HeLaSS27_6hrDox_Z004	5	967.044	0
HeLaSS27_6hrDox_Z004	6	611.46	0
HeLaSS27_6hrDox_Z004	7	760.679	2
HeLaSS27_6hrDox_Z005	1	429.365	0
HeLaSS27_6hrDox_Z005	2	318.891	0
HeLaSS27_6hrDox_Z005	3	368.799	0
HeLaSS27_6hrDox_Z005	4	305.154	0
HeLaSS27_6hrDox_Z005	5	312.716	0
HeLaSS27_6hrDox_Z005	6	446.811	3
HeLaSS27_6hrDox_Z005	7	820.526	0
HeLaSS27_6hrDox_Z005	8	521.691	1
HeLaSS27_6hrDox_Z005	9	527.884	25
HeLaSS27_6hrDox_Z005	10	466.058	17
HeLaSS27_6hrDox_Z006	1	1226.93	0
HeLaSS27_6hrDox_Z006	2	740.353	1
HeLaSS27_6hrDox_Z006	3	1108.34	0
HeLaSS27_6hrDox_Z006	4	866.778	0
HeLaSS27_6hrDox_Z006	5	948.248	42
HeLaSS27_6hrDox_Z007	1	1051.18	1
HeLaSS27_6hrDox_Z007	2	1110.34	0
HeLaSS27_6hrDox_Z007	3	961.337	10
HeLaSS27_6hrDox_Z007	4	1067.26	2
HeLaSS27_6hrDox_Z007	5	481.109	28
HeLaSS27_6hrDox_Z007	6	492.866	33
HeLaSS27_6hrDox_Z008	1	582.131	0
HeLaSS27_6hrDox_Z008	2	451.997	0
HeLaSS27_6hrDox_Z008	3	697.052	0
HeLaSS27_6hrDox_Z008	4	599.433	4
HeLaSS27_6hrDox_Z008	5	887.285	0
HeLaSS27_6hrDox_Z008	6	884.711	0
HeLaSS27_6hrDox_Z008	7	968.484	58
HeLaSS27_6hrDox_Z009	1	783.257	0
HeLaSS27_6hrDox_Z009	2	1090.23	0
HeLaSS27_6hrDox_Z009	3	964.379	0
HeLaSS27_6hrDox_Z009	4	505.793	0
HeLaSS27_6hrDox_Z009	5	794.383	0
HeLaSS27_6hrDox_Z009	6	1599.17	4
HeLaSS27_6hrDox_Z010	1	643.346	2
HeLaSS27_6hrDox_Z010	2	495.459	1
HeLaSS27_6hrDox_Z010	3	389.702	0
HeLaSS27_6hrDox_Z010	4	577.882	2
HeLaSS27_6hrDox_Z010	5	668.3	7
HeLaSS27_6hrDox_Z010	6	1290.33	5
HeLaSS27_6hrDox_Z010	7	387.019	20
HeLaSS27_6hrDox_Z011	1	588.199	0
HeLaSS27_6hrDox_Z011	2	451.204	0
HeLaSS27_6hrDox_Z011	3	528.353	0
HeLaSS27_6hrDox_Z011	4	398.596	0
HeLaSS27_6hrDox_Z011	5	765.216	1
HeLaSS27_6hrDox_Z011	6	751.191	28
HeLaSS27_6hrDox_Z012	1	636	0
HeLaSS27_6hrDox_Z012	2	683.495	0
HeLaSS27_6hrDox_Z012	3	421.875	0
HeLaSS27_6hrDox_Z012	4	597.543	1
HeLaSS27_6hrDox_Z012	5	385.777	0
HeLaSS27_6hrDox_Z012	6	875.474	3
