# Supplementary material for: Condensation of LINE-1 is critical for retrotransposition
Source: eLife journal article supplement (doi:10.7554/elife.82991), 2023-04-28
Supplement: supp [file totalPunctaPerCell_maxZfindMaxima_20211017_HeLaORF1_WTdoxPunctaTimecourse_punctaTimepointsMultiwell_BioRep2_Prom75.xlsx]

## Sheet: Summary
0hr_PunctaPerCell	3hr_PunctaPerCell	6hr_PunctaPerCell	24hr_PunctaPerCell
0	0	0	8
0	0	1	36
2	0	0	38
1	0	0	47
0	0	0	81
0	0	0	12
0	4	10	80
0	3	1	87
4	25	0	45
1	0	0	57
0	0	0	71
0	0	0	94
0	0	0	159
0	0	2	7
0	0	0	22
0	0	5	32
0	0	2	24
0	1	1	34
1	0	1	70
0	6	0	109
0	18	1	0
0	0	1	1
0	2	10	4
0	0	8	3
0	0	6	4
0	0	0	5
0	0	0	7
0	0	0	8
0	0	0	12
1	0	6	18
0	0	15	60
0	0	0	28
0	0	0	55
0	0	0	21
0	1	1	53
0	0	0	66
0	0	8	69
0	0	47	21
0	0	39	22
0	0	65	45
0	0	44	44
0	0	54	110
0	0	0	79
0	0	1	2
0	0	0	1
0	0	0	2
0	0	3	1
1	0	6	1
0	0	0	1
0	0	0	7
0	1	1	13
0	0	2	78
0	0	0	75
0	0	0	72
0	0	1	89
0	1	0	158
0	0	0	97
0	0	1	166
0	3	0	128
0	2	1	7
0	11	1	11
0	0	0	9
0	0	5	17
0	0	2	14
0	0	5	35
0	0	18	26
1	0	40	36
0	0	22	30
0	0	1	6
0	0	6	12
0	0	3	16
0	0	0	21
0	1	6	48
0	0	4	73
0	1	0	77
0	0	20	168
0	1	63	206
0	1	91	28
0	0	68	54
0	60	0	66
0	72	2	97
0	76	0	82
0	0	23	114
0	0	38	132
0	0	54	5
0	0	38	8
0	0	52	17
0	0	44	43
0	0	0	51
0	0	0	42
0	0	0	100
0	1	0	126
0	0	1	133
0	0	2
0	0	9
0	1	16
0	0	9
0	2	14
0	5	8
0	0	23
0	5	18
0	0	39
0	0	0
0	0	0
0	0	1
0	0	1
0	0	0
0	5	0
0	0	2
0	0	0
0	0	10
0	24	5
0	1	10
0	0	0
0	0	2
0	0	0
0	0	0
	0	0
	1	0
	4	0
	8	0
		3
		0
		1
		0
		58
		47
		48

## Sheet: 0hr
FOV	Cell	Area	# of Puncta
0hrDox_Z001	1	641.905	0
0hrDox_Z001	2	231.985	0
0hrDox_Z001	3	353.153	2
0hrDox_Z001	4	540.145	1
0hrDox_Z001	5	553.612	0
0hrDox_Z001	6	694.172	0
0hrDox_Z001	7	498.267	0
0hrDox_Z001	8	492.65	0
0hrDox_Z002	1	665.023	4
0hrDox_Z002	2	803.853	1
0hrDox_Z002	3	398.092	0
0hrDox_Z002	4	256.344	0
0hrDox_Z002	5	465.482	0
0hrDox_Z002	6	381.816	0
0hrDox_Z002	7	445.857	0
0hrDox_Z002	8	662.7	0
0hrDox_Z002	9	406.626	0
0hrDox_Z002	10	544.682	0
0hrDox_Z002	11	509.664	1
0hrDox_Z003	1	594.5	0
0hrDox_Z003	2	542.756	0
0hrDox_Z003	3	437.341	0
0hrDox_Z003	4	692.587	0
0hrDox_Z003	5	335.401	0
0hrDox_Z003	6	330.216	0
0hrDox_Z003	7	553.883	0
0hrDox_Z003	8	867.084	0
0hrDox_Z004	1	320.872	0
0hrDox_Z004	2	329.604	0
0hrDox_Z004	3	344.295	1
0hrDox_Z004	4	360.229	0
0hrDox_Z004	5	247.054	0
0hrDox_Z004	6	473.926	0
0hrDox_Z004	7	392.439	0
0hrDox_Z004	8	489.427	0
0hrDox_Z004	9	367.413	0
0hrDox_Z004	10	463.393	0
0hrDox_Z004	11	361.903	0
0hrDox_Z004	12	494.559	0
0hrDox_Z005	1	693.956	0
0hrDox_Z005	2	425.836	0
0hrDox_Z005	3	813.576	0
0hrDox_Z005	4	504.767	0
0hrDox_Z005	5	413.233	0
0hrDox_Z006	1	335.563	0
0hrDox_Z006	2	360.337	0
0hrDox_Z006	3	337.94	0
0hrDox_Z006	4	426.503	1
0hrDox_Z006	5	771.14	0
0hrDox_Z006	6	467.084	0
0hrDox_Z006	7	387.991	0
0hrDox_Z006	8	402.017	0
0hrDox_Z006	9	509.988	0
0hrDox_Z006	10	469.029	0
0hrDox_Z007	1	311.635	0
0hrDox_Z007	2	430.481	0
0hrDox_Z007	3	308.845	0
0hrDox_Z007	4	438.871	0
0hrDox_Z007	5	293.217	0
0hrDox_Z007	6	324.112	0
0hrDox_Z007	7	292.119	0
0hrDox_Z007	8	356.61	0
0hrDox_Z007	9	493.298	0
0hrDox_Z007	10	439.97	0
0hrDox_Z007	11	333.421	0
0hrDox_Z007	12	360.427	0
0hrDox_Z008	1	498.123	1
0hrDox_Z008	2	577.378	0
0hrDox_Z008	3	603.952	0
0hrDox_Z008	4	343.323	0
0hrDox_Z008	5	345.79	0
0hrDox_Z008	6	368.205	0
0hrDox_Z008	7	464.78	0
0hrDox_Z008	8	462.025	0
0hrDox_Z008	9	463.663	0
0hrDox_Z008	10	529.127	0
0hrDox_Z009	1	571.527	0
0hrDox_Z009	2	597.039	0
0hrDox_Z009	3	510.204	0
0hrDox_Z009	4	588.793	0
0hrDox_Z009	5	718.783	0
0hrDox_Z009	6	647.973	0
0hrDox_Z009	7	576.118	0
0hrDox_Z009	8	479.399	0
0hrDox_Z009	9	604.727	0
0hrDox_Z010	1	561.966	0
0hrDox_Z010	2	588.109	0
0hrDox_Z010	3	547.761	0
0hrDox_Z010	4	511.411	0
0hrDox_Z010	5	384.787	0
0hrDox_Z010	6	235.189	0
0hrDox_Z010	7	308.179	0
0hrDox_Z010	8	349.858	0
0hrDox_Z010	9	541.46	0
0hrDox_Z010	10	276.023	0
0hrDox_Z010	11	226.349	0
0hrDox_Z010	12	323.068	0
0hrDox_Z010	13	364.55	0
0hrDox_Z011	1	916.956	0
0hrDox_Z011	2	660.414	0
0hrDox_Z011	3	455.867	0
0hrDox_Z011	4	448.126	0
0hrDox_Z011	5	419.733	0
0hrDox_Z011	6	532.656	0
0hrDox_Z011	7	491.552	0
0hrDox_Z011	8	583.518	0
0hrDox_Z011	9	576.766	0
0hrDox_Z012	1	620.912	0
0hrDox_Z012	2	358.555	0
0hrDox_Z012	3	375.551	0
0hrDox_Z012	4	657.677	0
0hrDox_Z012	5	509.214	0
0hrDox_Z012	6	522.771	0
0hrDox_Z012	7	446.001	0
0hrDox_Z012	8	435.217	0
0hrDox_Z012	9	673.359	0
0hrDox_Z012	10	671.162	0

## Sheet: 3hr
FOV	Cell	Area	# of Puncta
3hrDox_Z001	1	378.269	0
3hrDox_Z001	2	497.133	0
3hrDox_Z001	3	429.527	0
3hrDox_Z001	4	533.268	0
3hrDox_Z001	5	388.964	0
3hrDox_Z001	6	423.928	0
3hrDox_Z001	7	607.445	4
3hrDox_Z001	8	553	3
3hrDox_Z001	9	1025.72	25
3hrDox_Z002	1	415.97	0
3hrDox_Z002	2	355.656	0
3hrDox_Z002	3	332.502	0
3hrDox_Z002	4	398.002	0
3hrDox_Z002	5	393.105	0
3hrDox_Z002	6	511.465	0
3hrDox_Z002	7	514.777	0
3hrDox_Z002	8	474.286	0
3hrDox_Z002	9	707.135	1
3hrDox_Z002	10	516.632	0
3hrDox_Z002	11	612.558	6
3hrDox_Z002	12	816.492	18
3hrDox_Z003	1	399.946	0
3hrDox_Z003	2	780.322	2
3hrDox_Z003	3	211.964	0
3hrDox_Z003	4	351.533	0
3hrDox_Z003	5	302.795	0
3hrDox_Z003	6	449.818	0
3hrDox_Z003	7	232.201	0
3hrDox_Z003	8	341.468	0
3hrDox_Z003	9	349.246	0
3hrDox_Z004	1	324.346	0
3hrDox_Z004	2	355.35	0
3hrDox_Z004	3	636.936	0
3hrDox_Z004	4	818.923	0
3hrDox_Z004	5	1331.61	1
3hrDox_Z005	1	420.039	0
3hrDox_Z005	2	372.796	0
3hrDox_Z005	3	369.069	0
3hrDox_Z005	4	315.758	0
3hrDox_Z005	5	327.533	0
3hrDox_Z005	6	417.879	0
3hrDox_Z005	7	320.71	0
3hrDox_Z005	8	355.494	0
3hrDox_Z005	9	304.47	0
3hrDox_Z005	10	396.507	0
3hrDox_Z005	11	368.655	0
3hrDox_Z005	12	459.504	0
3hrDox_Z005	13	403.259	0
3hrDox_Z005	14	523.365	0
3hrDox_Z006	1	339.398	0
3hrDox_Z006	2	411.829	1
3hrDox_Z006	3	464.077	0
3hrDox_Z006	4	436.729	0
3hrDox_Z006	5	486.745	0
3hrDox_Z006	6	392.583	0
3hrDox_Z006	7	521.871	1
3hrDox_Z006	8	404.609	0
3hrDox_Z006	9	512.437	0
3hrDox_Z006	10	611.154	3
3hrDox_Z006	11	496.701	2
3hrDox_Z006	12	1607.72	11
3hrDox_Z007	1	601.81	0
3hrDox_Z007	2	435.307	0
3hrDox_Z007	3	572.427	0
3hrDox_Z007	4	381.186	0
3hrDox_Z007	5	444.705	0
3hrDox_Z007	6	411.451	0
3hrDox_Z007	7	398.164	0
3hrDox_Z007	8	407.562	0
3hrDox_Z007	9	246.802	0
3hrDox_Z007	10	303.876	0
3hrDox_Z007	11	504.209	0
3hrDox_Z007	12	1175.84	1
3hrDox_Z008	1	546.933	0
3hrDox_Z008	2	824.864	1
3hrDox_Z008	3	684.521	0
3hrDox_Z008	4	796.976	1
3hrDox_Z008	5	706.847	1
3hrDox_Z008	6	540.847	0
3hrDox_Z008	7	826.827	60
3hrDox_Z008	8	965.027	72
3hrDox_Z008	9	959.302	76
3hrDox_Z009	1	524.284	0
3hrDox_Z009	2	459.162	0
3hrDox_Z009	3	417.572	0
3hrDox_Z009	4	379.818	0
3hrDox_Z009	5	525.22	0
3hrDox_Z009	6	331.62	0
3hrDox_Z009	7	802.377	0
3hrDox_Z009	8	563.947	0
3hrDox_Z009	9	342.621	0
3hrDox_Z009	10	535.572	1
3hrDox_Z010	1	385.003	0
3hrDox_Z010	2	528.911	0
3hrDox_Z010	3	871.243	0
3hrDox_Z010	4	795.139	1
3hrDox_Z010	5	606.941	0
3hrDox_Z010	6	721.286	2
3hrDox_Z010	7	491.588	5
3hrDox_Z010	8	638.268	0
3hrDox_Z010	9	843.589	5
			.
3hrDox_Z011	1	667.615	0
3hrDox_Z011	2	482.19	0
3hrDox_Z011	3	383.004	0
3hrDox_Z011	4	422.56	0
3hrDox_Z011	5	402.809	0
3hrDox_Z011	6	445.857	0
3hrDox_Z011	7	731.819	5
3hrDox_Z011	8	577.45	0
3hrDox_Z011	9	581.213	0
3hrDox_Z011	10	421.659	0
3hrDox_Z011	11	750.903	24
3hrDox_Z012	1	354.252	1
3hrDox_Z012	2	437.071	0
3hrDox_Z012	3	579.827	0
3hrDox_Z012	4	576.964	0
3hrDox_Z012	5	499.582	0
3hrDox_Z012	6	571.707	0
3hrDox_Z012	7	567.908	1
3hrDox_Z012	8	945.835	4
3hrDox_Z012	9	627.412	8

## Sheet: 6hr
FOV	Cell	Area	# of Puncta
6hrDox_Z001	1	897.62	0
6hrDox_Z001	2	617.618	1
6hrDox_Z001	3	453.401	0
6hrDox_Z001	4	402.197	0
6hrDox_Z001	5	364.604	0
6hrDox_Z001	6	490.832	0
6hrDox_Z001	7	540.253	10
6hrDox_Z001	8	740.749	1
6hrDox_Z001	9	432.48	0
6hrDox_Z002	1	310.069	0
6hrDox_Z002	2	224.909	0
6hrDox_Z002	3	267.183	0
6hrDox_Z002	4	397.534	0
6hrDox_Z002	5	392.583	2
6hrDox_Z002	6	488.365	0
6hrDox_Z002	7	627.7	5
6hrDox_Z002	8	411.577	2
6hrDox_Z002	9	415.664	1
6hrDox_Z002	10	473.962	1
6hrDox_Z002	11	380.862	0
6hrDox_Z002	12	340.892	1
6hrDox_Z002	13	286.051	1
6hrDox_Z002	14	569.33	10
6hrDox_Z002	15	469.857	8
6hrDox_Z002	16	512.077	6
6hrDox_Z002	17	342.081	0
6hrDox_Z003	1	568.79	0
6hrDox_Z003	2	1165.25	0
6hrDox_Z003	3	770.204	0
6hrDox_Z003	4	830.122	6
6hrDox_Z003	5	1803.63	15
6hrDox_Z004	1	590.413	0
6hrDox_Z004	2	402.971	0
6hrDox_Z004	3	630.347	0
6hrDox_Z004	4	704.92	1
6hrDox_Z004	5	396.94	0
6hrDox_Z004	6	679.552	8
6hrDox_Z004	7	614.485	47
6hrDox_Z004	8	600.135	39
6hrDox_Z004	9	500.752	65
6hrDox_Z004	10	328.361	44
6hrDox_Z004	11	472.251	54
6hrDox_Z005	1	459.54	0
6hrDox_Z005	2	677.59	1
6hrDox_Z005	3	731.386	0
6hrDox_Z005	4	629.77	0
6hrDox_Z005	5	819.715	3
6hrDox_Z005	6	826.287	6
6hrDox_Z005	7	757.006	0
6hrDox_Z006	1	563.695	0
6hrDox_Z006	2	747.5	1
6hrDox_Z006	3	928.515	2
6hrDox_Z006	4	595.634	0
6hrDox_Z006	5	550.228	0
6hrDox_Z006	6	739.83	1
6hrDox_Z006	7	490.724	0
6hrDox_Z006	8	705.19	0
6hrDox_Z007	1	535.824	1
6hrDox_Z007	2	625.792	0
6hrDox_Z007	3	533.178	1
6hrDox_Z007	4	424.576	1
6hrDox_Z007	5	527.29	0
6hrDox_Z007	6	683.783	5
6hrDox_Z007	7	1053.79	2
6hrDox_Z007	8	611.748	5
6hrDox_Z007	9	480.803	18
6hrDox_Z007	10	769.429	40
6hrDox_Z007	11	380.682	22
6hrDox_Z008	1	625.269	1
6hrDox_Z008	2	656.831	6
6hrDox_Z008	3	552.46	3
6hrDox_Z008	4	625.269	0
6hrDox_Z008	5	378.125	6
6hrDox_Z008	6	433.452	4
6hrDox_Z008	7	305.622	0
6hrDox_Z008	8	366.999	20
6hrDox_Z008	9	1129.39	63
6hrDox_Z008	10	609.714	91
6hrDox_Z008	11	455.813	68
6hrDox_Z009	1	460.531	0
6hrDox_Z009	2	527.992	2
6hrDox_Z009	3	422.92	0
6hrDox_Z009	4	518.864	23
6hrDox_Z009	5	765.991	38
6hrDox_Z009	6	1136.36	54
6hrDox_Z009	7	796.616	38
6hrDox_Z009	8	966.72	52
6hrDox_Z009	9	1120.53	44
6hrDox_Z010	1	522.285	0
6hrDox_Z010	2	542.144	0
6hrDox_Z010	3	559.716	0
6hrDox_Z010	4	516.38	0
6hrDox_Z010	5	383.941	1
6hrDox_Z010	6	538.345	2
6hrDox_Z010	7	952.821	9
6hrDox_Z010	8	1106.9	16
6hrDox_Z010	9	511.213	9
6hrDox_Z010	10	271.99	14
6hrDox_Z010	11	408.948	8
6hrDox_Z010	12	424.342	23
6hrDox_Z010	13	383.346	18
6hrDox_Z010	14	447.676	39
6hrDox_Z011	1	373.93	0
6hrDox_Z011	2	389.612	0
6hrDox_Z011	3	457.452	1
6hrDox_Z011	4	519.008	1
6hrDox_Z011	5	326.633	0
6hrDox_Z011	6	333.277	0
6hrDox_Z011	7	815.952	2
6hrDox_Z011	8	523.689	0
6hrDox_Z011	9	725.679	10
6hrDox_Z011	10	1016.29	5
6hrDox_Z011	11	613.351	10
6hrDox_Z012	1	536.707	0
6hrDox_Z012	2	598.713	2
6hrDox_Z012	3	632.705	0
6hrDox_Z012	4	324.292	0
6hrDox_Z012	5	364.55	0
6hrDox_Z012	6	427.655	0
6hrDox_Z012	7	288.86	0
6hrDox_Z012	8	422.091	0
6hrDox_Z012	9	643.616	3
6hrDox_Z012	10	349.3	0
6hrDox_Z012	11	326.687	1
6hrDox_Z012	12	275.915	0
6hrDox_Z012	13	589.729	58
6hrDox_Z012	14	388.478	47
6hrDox_Z012	15	387.721	48

## Sheet: 24hr
FOV	Cell	Area	# of Puncta
24hrDox_Z001	1	678.166	8
24hrDox_Z001	2	1141.02	36
24hrDox_Z001	3	846.325	38
24hrDox_Z001	4	942.54	47
24hrDox_Z001	5	549.868	81
24hrDox_Z002	1	704.146	12
24hrDox_Z002	2	1113.09	80
24hrDox_Z002	3	1257.9	87
24hrDox_Z002	4	381.636	45
24hrDox_Z002	5	422.182	57
24hrDox_Z002	6	542.504	71
24hrDox_Z002	7	717.757	94
24hrDox_Z002	8	888.167	159
24hrDox_Z003	1	666.571	7
24hrDox_Z003	2	1090.19	22
24hrDox_Z003	3	1088.79	32
24hrDox_Z003	4	961.391	24
24hrDox_Z003	5	631.157	34
24hrDox_Z003	6	751.515	70
24hrDox_Z003	7	981.483	109
24hrDox_Z004	1	496.053	0
24hrDox_Z004	2	550.3	1
24hrDox_Z004	3	743.791	4
24hrDox_Z004	4	1132.16	3
24hrDox_Z004	5	892.632	4
24hrDox_Z004	6	1371.53	5
24hrDox_Z005	1	859.649	7
24hrDox_Z005	2	661.98	8
24hrDox_Z005	3	906.01	12
24hrDox_Z005	4	797.066	18
24hrDox_Z005	5	1071.65	60
24hrDox_Z005	6	706.324	28
24hrDox_Z005	7	699.411	55
24hrDox_Z005	8	447.568	21
24hrDox_Z005	9	866.58	53
24hrDox_Z005	10	637.962	66
24hrDox_Z005	11	601.864	69
24hrDox_Z006	1	776.505	21
24hrDox_Z006	2	674.223	22
24hrDox_Z006	3	727.966	45
24hrDox_Z006	4	536.166	44
24hrDox_Z006	5	759.329	110
24hrDox_Z006	6	771.644	79
24hrDox_Z007	1	734.825	2
24hrDox_Z007	2	685.097	1
24hrDox_Z007	3	974.624	2
24hrDox_Z007	4	473.278	1
24hrDox_Z007	5	498.015	1
24hrDox_Z007	6	1013.89	1
24hrDox_Z007	7	797.48	7
24hrDox_Z007	8	853.365	13
24hrDox_Z008	1	381.978	78
24hrDox_Z008	2	557.375	75
24hrDox_Z008	3	664.771	72
24hrDox_Z008	4	846.073	89
24hrDox_Z008	5	725.769	158
24hrDox_Z008	6	412.261	97
24hrDox_Z008	7	720.152	166
24hrDox_Z008	8	514.507	128
24hrDox_Z009	1	739.416	7
24hrDox_Z009	2	747.032	11
24hrDox_Z009	3	482.856	9
24hrDox_Z009	4	738.192	17
24hrDox_Z009	5	584.778	14
24hrDox_Z009	6	650.979	35
24hrDox_Z009	7	533.196	26
24hrDox_Z009	8	574.245	36
24hrDox_Z009	9	482.856	30
24hrDox_Z010	1	854.445	6
24hrDox_Z010	2	776.505	12
24hrDox_Z010	3	906.622	16
24hrDox_Z010	4	694.586	21
24hrDox_Z010	5	940.56	48
24hrDox_Z010	6	691.435	73
24hrDox_Z010	7	589.747	77
24hrDox_Z010	8	995.005	168
24hrDox_Z010	9	1256.53	206
24hrDox_Z011	1	529.127	28
24hrDox_Z011	2	825.243	54
24hrDox_Z011	3	540.847	66
24hrDox_Z011	4	447.243	97
24hrDox_Z011	5	860.855	82
24hrDox_Z011	6	939.84	114
24hrDox_Z011	7	674.007	132
24hrDox_Z012	1	753.928	5
24hrDox_Z012	2	370.401	8
24hrDox_Z012	3	532.458	17
24hrDox_Z012	4	339.506	43
24hrDox_Z012	5	371.518	51
24hrDox_Z012	6	385.219	42
24hrDox_Z012	7	521.061	100
24hrDox_Z012	8	580.097	126
24hrDox_Z012	9	642.932	133
