# Supplementary material for: Condensation of LINE-1 is critical for retrotransposition
Source: eLife journal article supplement (doi:10.7554/elife.82991), 2023-04-28
Supplement: supp [file totalPunctaPerCell_maxZfindMaxima_20211017_HeLaORF1_WTdoxPunctaTimecourse_punctaTimepointsMultiwell_BioRep3_Prom75.xlsx]

## Sheet: Summary
0hr_PunctaPerCell	3hr_PunctaPerCell	6hr_PunctaPerCell	24hr_PunctaPerCell
0	0	0	24
0	1	1	10
0	0	0	57
0	0	0	35
0	0	1	22
0	0	2	52
0	9	0	9
0	19	1	40
0	0	7	59
0	0	8	56
0	0	0	52
0	0	0	70
0	0	0	51
0	0	1	81
0	0	1	72
0	0	11	52
0	0	5	0
0	0	0	8
0	0	14	11
0	2	16	30
0	8	39	31
0	7	29	42
0	0	105	131
0	1	109	47
0	0	97	60
0	2	0	93
0	16	2	13
0	15	2	5
0	17	18	8
0	0	4	54
0	9	12	0
0	2	13	3
0	0	24	12
0	1	14	54
0	0	0	7
0	0	3	14
0	0	3	27
0	16	0	27
0	0	11	81
0	0	65	53
0	0	26	103
0	0	53	12
0	0	55	12
0	0	45	25
0	0	1	34
0	0	0	2
0	0	0	19
0	0	2	45
0	0	0	38
0	1	4	82
0	3	7	17
0	1	0	17
0	0	0	28
0	1	0	25
0	0	1	35
0	1	0	105
0	0	0	81
0	0	2	75
0	0	5	20
0	5	3	17
0	3	0	26
0	1	5	36
0	2	0	30
1	0	4	26
0	34	2	36
0	15	29	45
0	48	14	44
0	48	17	76
0	146	18	67
0	131	0	31
0	0	14	24
0	1	13	22
0	4	0	27
0	1	1	12
1	0	0	51
0	0	3	78
0	0	0	34
0	2	26	210
1	7	12	100
0	27	54	89
0	0	55	61
0	0	63	19
1	2	2	43
0	1	0	68
0	0	6	79
0	3	5	101
0	1	16	119
0	8	20	165
0	14	24	3
0	0	39	0
0	0	39	12
0	0	35	22
0	0	62	27
0	0	0	36
0	0	5	39
0	12	6	70
0	26	3	53
0	8	7
0	0	7
0	0	10
0	0	9
0	0	23
0	2	16
	0	32
	2	36
	0	25
	0	1
	0	0
	1	1
	0	0
	3	4
	11	5
	4	19
	11	24
	16	19
	32	5
		13

## Sheet: 0hr
FOV	Cell	Area	# of Puncta
0hrDox_Z001	1	996.283	0
0hrDox_Z001	2	664.501	0
0hrDox_Z001	3	714.372	0
0hrDox_Z001	4	500.176	0
0hrDox_Z001	5	385.543	0
0hrDox_Z001	6	694.136	0
0hrDox_Z001	7	1124.31	0
0hrDox_Z002	1	565.333	0
0hrDox_Z002	2	370.005	0
0hrDox_Z002	3	539.497	0
0hrDox_Z002	4	658.073	0
0hrDox_Z002	5	749.067	0
0hrDox_Z002	6	686.07	0
0hrDox_Z002	7	391.358	0
0hrDox_Z002	8	539.839	0
0hrDox_Z003	1	569.816	0
0hrDox_Z003	2	575.362	0
0hrDox_Z003	3	589.567	0
0hrDox_Z003	4	454.715	0
0hrDox_Z003	5	587.316	0
0hrDox_Z003	6	636.576	0
0hrDox_Z003	7	405.618	0
0hrDox_Z003	8	449.602	0
0hrDox_Z003	9	721.394	0
0hrDox_Z004	1	974.138	0
0hrDox_Z004	2	617.978	0
0hrDox_Z004	3	478.175	0
0hrDox_Z004	4	806.176	0
0hrDox_Z004	5	778.089	0
0hrDox_Z004	6	1038.76	0
0hrDox_Z004	7	1008.9	0
0hrDox_Z005	1	295.828	0
0hrDox_Z005	2	491.912	0
0hrDox_Z005	3	474.322	0
0hrDox_Z005	4	580.079	0
0hrDox_Z005	5	683.117	0
0hrDox_Z005	6	1308.64	0
0hrDox_Z006	1	535.05	0
0hrDox_Z006	2	727.912	0
0hrDox_Z006	3	684.179	0
0hrDox_Z006	4	402.575	0
0hrDox_Z006	5	456.516	0
0hrDox_Z006	6	363.506	0
0hrDox_Z006	7	444.615	0
0hrDox_Z006	8	526.174	0
0hrDox_Z006	9	489.535	0
0hrDox_Z007	1	565.693	0
0hrDox_Z007	2	328.92	0
0hrDox_Z007	3	589.999	0
0hrDox_Z007	4	584.76	0
0hrDox_Z007	5	692.641	0
0hrDox_Z007	6	571.239	0
0hrDox_Z007	7	558.078	0
0hrDox_Z007	8	694.622	0
0hrDox_Z008	1	572.373	0
0hrDox_Z008	2	626.296	0
0hrDox_Z008	3	446.451	0
0hrDox_Z008	4	535.896	0
0hrDox_Z008	5	557.862	0
0hrDox_Z008	6	738.21	0
0hrDox_Z008	7	374.128	0
0hrDox_Z008	8	610.632	0
0hrDox_Z008	9	476.086	0
0hrDox_Z008	10	645.218	1
0hrDox_Z008	11	568.142	0
0hrDox_Z008	12	631.679	0
0hrDox_Z008	13	373.012	0
0hrDox_Z009	1	758.537	0
0hrDox_Z009	2	559.824	0
0hrDox_Z009	3	788.1	0
0hrDox_Z009	4	785.975	0
0hrDox_Z009	5	634.254	0
0hrDox_Z009	6	806.032	0
0hrDox_Z009	7	850.07	0
0hrDox_Z010	1	343.197	1
0hrDox_Z010	2	424.324	0
0hrDox_Z010	3	483.27	0
0hrDox_Z010	4	522.177	0
0hrDox_Z010	5	589.099	1
0hrDox_Z010	6	301.805	0
0hrDox_Z010	7	488.815	0
0hrDox_Z010	8	533.322	0
0hrDox_Z010	9	426.503	1
0hrDox_Z010	10	425.404	0
0hrDox_Z010	11	313.778	0
0hrDox_Z010	12	343.683	0
0hrDox_Z010	13	282.289	0
0hrDox_Z010	14	459.18	0
0hrDox_Z011	1	847.28	0
0hrDox_Z011	2	567.08	0
0hrDox_Z011	3	772.724	0
0hrDox_Z011	4	985.228	0
0hrDox_Z011	5	484.26	0
0hrDox_Z011	6	865.878	0
0hrDox_Z011	7	431.508	0
0hrDox_Z011	8	411.253	0
0hrDox_Z011	9	713.004	0
0hrDox_Z012	1	1003.5	0
0hrDox_Z012	2	820.309	0
0hrDox_Z012	3	906.136	0
0hrDox_Z012	4	558.456	0
0hrDox_Z012	5	590.575	0
0hrDox_Z012	6	674.421	0

## Sheet: 3hr
FOV	Cell	Area	# of Puncta
3hrDox_Z001	1	646.298	0
3hrDox_Z001	2	700.293	1
3hrDox_Z001	3	516.11	0
3hrDox_Z001	4	644.912	0
3hrDox_Z001	5	450.142	0
3hrDox_Z001	6	663.726	0
3hrDox_Z001	7	1213.5	9
3hrDox_Z001	8	1383.39	19
3hrDox_Z002	1	356.16	0
3hrDox_Z002	2	440.348	0
3hrDox_Z002	3	262.862	0
3hrDox_Z002	4	433.902	0
3hrDox_Z002	5	344.133	0
3hrDox_Z002	6	300.221	0
3hrDox_Z002	7	320.115	0
3hrDox_Z002	8	414.836	0
3hrDox_Z002	9	585.174	0
3hrDox_Z002	10	298.708	0
3hrDox_Z002	11	452.717	0
3hrDox_Z002	12	462.889	2
3hrDox_Z002	13	717.199	8
3hrDox_Z002	14	602.242	7
3hrDox_Z003	1	616.843	0
3hrDox_Z003	2	660.504	1
3hrDox_Z003	3	709.007	0
3hrDox_Z003	4	664.879	2
3hrDox_Z003	5	1008.13	16
3hrDox_Z003	6	834.533	15
3hrDox_Z003	7	755.368	17
3hrDox_Z003	8	548.247	0
3hrDox_Z004	1	1082.02	9
3hrDox_Z004	2	588.883	2
3hrDox_Z004	3	761.219	0
3hrDox_Z004	4	545.475	1
3hrDox_Z004	5	607.463	0
3hrDox_Z004	6	773.228	0
3hrDox_Z004	7	586.74	0
3hrDox_Z004	8	1308.42	16
3hrDox_Z005	1	363.92	0
3hrDox_Z005	2	629.554	0
3hrDox_Z005	3	523.185	0
3hrDox_Z005	4	345.285	0
3hrDox_Z005	5	453.491	0
3hrDox_Z005	6	537.931	0
3hrDox_Z005	7	639.835	0
3hrDox_Z005	8	484.062	0
3hrDox_Z005	9	279.822	0
3hrDox_Z005	10	357.978	0
3hrDox_Z005	11	548.229	0
3hrDox_Z005	12	360.517	1
3hrDox_Z005	13	549.021	3
3hrDox_Z005	14	585.624	1
3hrDox_Z006	1	874.034	0
3hrDox_Z006	2	1182.34	1
3hrDox_Z006	3	611.352	0
3hrDox_Z006	4	776.955	1
3hrDox_Z006	5	591.98	0
3hrDox_Z006	6	381.762	0
3hrDox_Z006	7	630.131	0
3hrDox_Z006	8	513.013	5
3hrDox_Z007	1	273.502	3
3hrDox_Z007	2	303.191	1
3hrDox_Z007	3	783.149	2
3hrDox_Z007	4	682.073	0
3hrDox_Z007	5	1059.37	34
3hrDox_Z007	6	884.152	15
3hrDox_Z007	7	824.558	48
3hrDox_Z007	8	1130.18	48
3hrDox_Z007	9	1007.09	146
3hrDox_Z007	10	913.679	131
3hrDox_Z008	1	388.37	0
3hrDox_Z008	2	323.896	1
3hrDox_Z008	3	448.18	4
3hrDox_Z008	4	693.397	1
3hrDox_Z008	5	486.421	0
3hrDox_Z008	6	690.859	0
3hrDox_Z008	7	682.415	0
3hrDox_Z008	8	958.294	2
3hrDox_Z008	9	1086.18	7
3hrDox_Z008	10	674.061	27
3hrDox_Z009	1	519.044	0
3hrDox_Z009	2	604.835	0
3hrDox_Z009	3	1094.62	2
3hrDox_Z009	4	638.43	1
3hrDox_Z009	5	615.997	0
3hrDox_Z009	6	510.51	3
3hrDox_Z009	7	387.901	1
3hrDox_Z009	8	952.641	8
3hrDox_Z009	9	738.228	14
3hrDox_Z010	1	1483.71	0
3hrDox_Z010	2	627.214	0
3hrDox_Z010	3	679.66	0
3hrDox_Z010	4	536.905	0
3hrDox_Z010	5	799.226	0
3hrDox_Z010	6	616.519	0
3hrDox_Z010	7	726.759	12
3hrDox_Z010	8	977.576	26
3hrDox_Z010	9	632.759	8
3hrDox_Z011	1	780.106	0
3hrDox_Z011	2	635.28	0
3hrDox_Z011	3	548.859	0
3hrDox_Z011	4	488.509	0
3hrDox_Z011	5	541.262	2
3hrDox_Z011	6	539.821	0
3hrDox_Z011	7	738.426	2
3hrDox_Z011	8	433.992	0
3hrDox_Z011	9	477.275	0
3hrDox_Z012	1	688.23	0
3hrDox_Z012	2	627.646	1
3hrDox_Z012	3	479.219	0
3hrDox_Z012	4	637.62	3
3hrDox_Z012	5	742.117	11
3hrDox_Z012	6	725.121	4
3hrDox_Z012	7	1187.2	11
3hrDox_Z012	8	789.054	16
3hrDox_Z012	9	592.718	32

## Sheet: 6hr
FOV	Cell	Area	# of Puncta
6hrDox_Z001	1	406.986	0
6hrDox_Z001	2	841.284	1
6hrDox_Z001	3	523.293	0
6hrDox_Z001	4	289.724	0
6hrDox_Z001	5	749.931	1
6hrDox_Z001	6	676.906	2
6hrDox_Z001	7	490.94	0
6hrDox_Z001	8	779.998	1
6hrDox_Z001	9	736.338	7
6hrDox_Z001	10	932.53	8
6hrDox_Z002	1	478.013	0
6hrDox_Z002	2	538.597	0
6hrDox_Z002	3	553.775	0
6hrDox_Z002	4	661.818	1
6hrDox_Z002	5	824.594	1
6hrDox_Z002	6	922.177	11
6hrDox_Z003	1	735.599	5
6hrDox_Z003	2	496.827	0
6hrDox_Z003	3	921.169	14
6hrDox_Z003	4	985.372	16
6hrDox_Z003	5	849.962	39
6hrDox_Z003	6	941.82	29
6hrDox_Z003	7	763.218	105
6hrDox_Z003	8	984.256	109
6hrDox_Z003	9	675.537	97
6hrDox_Z004	1	620.156	0
6hrDox_Z004	2	458.424	2
6hrDox_Z004	3	555.197	2
6hrDox_Z004	4	683.981	18
6hrDox_Z004	5	799.262	4
6hrDox_Z004	6	722.582	12
6hrDox_Z004	7	530.441	13
6hrDox_Z004	8	576.028	24
6hrDox_Z004	9	862.997	14
6hrDox_Z005	1	544.25	0
6hrDox_Z005	2	362.894	3
6hrDox_Z005	3	662.718	3
6hrDox_Z005	4	526.768	0
6hrDox_Z005	5	699.537	11
6hrDox_Z005	6	860.747	65
6hrDox_Z005	7	654.706	26
6hrDox_Z005	8	802.827	53
6hrDox_Z005	9	495.945	55
6hrDox_Z005	10	423.874	45
6hrDox_Z006	1	643.454	1
6hrDox_Z006	2	593.474	0
6hrDox_Z006	3	799.64	0
6hrDox_Z006	4	626.35	2
6hrDox_Z006	5	498.952	0
6hrDox_Z006	6	886.637	4
6hrDox_Z006	7	708.827	7
6hrDox_Z007	1	546.483	0
6hrDox_Z007	2	651.97	0
6hrDox_Z007	3	890.49	0
6hrDox_Z007	4	748.977	1
6hrDox_Z007	5	567.35	0
6hrDox_Z007	6	458.226	0
6hrDox_Z007	7	604.402	2
6hrDox_Z007	8	528.479	5
6hrDox_Z007	9	751.533	3
6hrDox_Z008	1	521.943	0
6hrDox_Z008	2	509.178	5
6hrDox_Z008	3	212.432	0
6hrDox_Z008	4	419.625	4
6hrDox_Z008	5	540.721	2
6hrDox_Z008	6	525.634	29
6hrDox_Z008	7	525.364	14
6hrDox_Z008	8	583.788	17
6hrDox_Z008	9	300.311	18
6hrDox_Z008	10	506.045	0
6hrDox_Z008	11	619.832	14
6hrDox_Z008	12	336.715	13
6hrDox_Z009	1	924.716	0
6hrDox_Z009	2	930.369	1
6hrDox_Z009	3	609.084	0
6hrDox_Z009	4	624.063	3
6hrDox_Z009	5	479.633	0
6hrDox_Z009	6	869.281	26
6hrDox_Z009	7	385.669	12
6hrDox_Z009	8	594.23	54
6hrDox_Z009	9	447.153	55
6hrDox_Z009	10	564.163	63
6hrDox_Z010	1	615.601	2
6hrDox_Z010	2	519.765	0
6hrDox_Z010	3	612.162	6
6hrDox_Z010	4	608.111	5
6hrDox_Z010	5	607.481	16
6hrDox_Z010	6	1044.98	20
6hrDox_Z010	7	646.532	24
6hrDox_Z010	8	498.79	39
6hrDox_Z010	9	797.264	39
6hrDox_Z010	10	375.479	35
6hrDox_Z010	11	452.357	62
6hrDox_Z011	1	678.67	0
6hrDox_Z011	2	494.667	5
6hrDox_Z011	3	664.771	6
6hrDox_Z011	4	492.452	3
6hrDox_Z011	5	512.275	7
6hrDox_Z011	6	396.976	7
6hrDox_Z011	7	495.207	10
6hrDox_Z011	8	825.062	9
6hrDox_Z011	9	717.001	23
6hrDox_Z011	10	511.213	16
6hrDox_Z011	11	706.324	32
6hrDox_Z011	12	674.241	36
6hrDox_Z011	13	759.077	25
6hrDox_Z012	1	669.866	1
6hrDox_Z012	2	672.26	0
6hrDox_Z012	3	578.296	1
6hrDox_Z012	4	429.959	0
6hrDox_Z012	5	516.416	4
6hrDox_Z012	6	424.594	5
6hrDox_Z012	7	759.581	19
6hrDox_Z012	8	650.655	24
6hrDox_Z012	9	946.951	19
6hrDox_Z012	10	455.795	5
6hrDox_Z012	11	847.46	13

## Sheet: 24hr
FOV	Cell	Area	# of Puncta
24hrDox_Z001	1	485.845	24
24hrDox_Z001	2	803.457	10
24hrDox_Z001	3	610.794	57
24hrDox_Z001	4	697.52	35
24hrDox_Z001	5	599.577	22
24hrDox_Z001	6	518.09	52
24hrDox_Z002	1	630.293	9
24hrDox_Z002	2	509.43	40
24hrDox_Z002	3	569.204	59
24hrDox_Z002	4	402.377	56
24hrDox_Z002	5	591.8	52
24hrDox_Z002	6	452.843	70
24hrDox_Z002	7	438.007	51
24hrDox_Z002	8	742.513	81
24hrDox_Z002	9	281.316	72
24hrDox_Z002	10	400.162	52
24hrDox_Z003	1	558.258	0
24hrDox_Z003	2	461.413	8
24hrDox_Z003	3	465.68	11
24hrDox_Z003	4	808.535	30
24hrDox_Z003	5	565.261	31
24hrDox_Z003	6	847.802	42
24hrDox_Z003	7	812.604	131
24hrDox_Z003	8	402.089	47
24hrDox_Z003	9	470.865	60
24hrDox_Z003	10	617.041	93
24hrDox_Z004	1	697.034	13
24hrDox_Z004	2	660.396	5
24hrDox_Z004	3	601.468	8
24hrDox_Z004	4	969.312	54
24hrDox_Z005	1	692.731	0
24hrDox_Z005	2	1107.59	3
24hrDox_Z005	3	1483.3	12
24hrDox_Z005	4	634.776	54
24hrDox_Z006	1	972.643	7
24hrDox_Z006	2	1234.73	14
24hrDox_Z006	3	473.512	27
24hrDox_Z006	4	768.583	27
24hrDox_Z006	5	901.599	81
24hrDox_Z006	6	943.981	53
24hrDox_Z006	7	1363.14	103
24hrDox_Z007	1	419.445	12
24hrDox_Z007	2	500.014	12
24hrDox_Z007	3	594.752	25
24hrDox_Z007	4	793.789	34
24hrDox_Z007	5	573.039	2
24hrDox_Z007	6	654.634	19
24hrDox_Z007	7	631.697	45
24hrDox_Z007	8	476.536	38
24hrDox_Z007	9	370.293	82
24hrDox_Z008	1	458.802	17
24hrDox_Z008	2	525.166	17
24hrDox_Z008	3	464.131	28
24hrDox_Z008	4	925.436	25
24hrDox_Z008	5	592.772	35
24hrDox_Z008	6	867.3	105
24hrDox_Z008	7	544.844	81
24hrDox_Z008	8	631.697	75
24hrDox_Z009	1	1165.14	20
24hrDox_Z009	2	532.151	17
24hrDox_Z009	3	376.217	26
24hrDox_Z009	4	700.707	36
24hrDox_Z009	5	408.03	30
24hrDox_Z009	6	282.919	26
24hrDox_Z009	7	540.235	36
24hrDox_Z009	8	507.99	45
24hrDox_Z009	9	538.939	44
24hrDox_Z009	10	524.122	76
24hrDox_Z009	11	499.15	67
24hrDox_Z010	1	504.173	31
24hrDox_Z010	2	404.663	24
24hrDox_Z010	3	545.673	22
24hrDox_Z010	4	383.688	27
24hrDox_Z010	5	341.36	12
24hrDox_Z010	6	608.201	51
24hrDox_Z010	7	430.139	78
24hrDox_Z010	8	490.832	34
24hrDox_Z010	9	859.018	210
24hrDox_Z010	10	435.523	100
24hrDox_Z010	11	401.459	89
24hrDox_Z010	12	311.852	61
24hrDox_Z011	1	611.658	19
24hrDox_Z011	2	928.191	43
24hrDox_Z011	3	934.636	68
24hrDox_Z011	4	936.005	79
24hrDox_Z011	5	564.163	101
24hrDox_Z011	6	905.884	119
24hrDox_Z011	7	781.51	165
24hrDox_Z012	1	501.4	3
24hrDox_Z012	2	432.66	0
24hrDox_Z012	3	684.449	12
24hrDox_Z012	4	579.755	22
24hrDox_Z012	5	686.988	27
24hrDox_Z012	6	430.481	36
24hrDox_Z012	7	403.835	39
24hrDox_Z012	8	385.111	70
24hrDox_Z012	9	904.299	53
