# Supplementary material for: Condensation of LINE-1 is critical for retrotransposition
Source: eLife journal article supplement (doi:10.7554/elife.82991), 2023-04-28
Supplement: supp [file WT_RNA_ORF1dropletFusionAnalysis.xlsx]

## Sheet: WTprotOnly
#1	Area	Mean Int	StDev Int	Major Axis	Minor Axis	Circ	AR	Time (s)	Thresh = 1211
1	4.76	1973.65	340.36	3.626	1.671	0.483	2.169	0	Area > 2um^2
2	6.24	2058.15	321.415	3.479	2.283	0.826	1.524	60	Tau:	57.87	s
3	6.29	2031.77	318.029	3.346	2.394	0.893	1.398	120	Fusion Length:	1.80743	um
4	6.265	2054.2	319.958	3.276	2.435	0.904	1.345	180	Tau/FusLength:	32.0178	s/um
5	6.282	2056.53	328.175	3.238	2.47	0.907	1.311	240
6	6.315	2084.57	330.643	3.24	2.482	0.907	1.306	300
7	6.307	2089.38	329.288	3.236	2.481	0.911	1.304	360
8	6.324	2102.76	333.453	3.206	2.511	0.888	1.277	420
9	6.349	2137.86	346.365	3.191	2.533	0.902	1.26	480
10	6.366	2172.49	349.659	3.2	2.533	0.904	1.264	540
11	6.416	2162.11	340.507	3.182	2.567	0.911	1.239	600
12	6.433	2154.48	345.038	3.179	2.576	0.914	1.234	660
13	6.467	2195.4	360.658	3.179	2.59	0.908	1.227	720
14	6.517	2289.28	394.13	3.188	2.603	0.901	1.225	780
15	6.483	2250.14	377.544	3.177	2.598	0.911	1.223	840
16	6.828	2357.44	409.436	3.209	2.709	0.919	1.185	900
#2
1	2.91	2841.7	697.826	2.808	1.319	0.678	2.128	0	Thresh = 1375
2	2.783	2958.95	679.99	2.316	1.531	0.867	1.513	60	Area > 2um^2
3	2.792	2899.13	664.871	2.249	1.581	0.907	1.423	120	Tau:	52.64	s
4	2.775	2928.09	670.664	2.216	1.595	0.886	1.389	180	Fusion Length:	1.40142	um
5	2.75	2976.93	672.667	2.176	1.609	0.915	1.353	240	Tau/FusLength:	37.5618	s/um
6	2.758	2986.31	686.464	2.159	1.626	0.918	1.328	300
7	2.758	2953.04	665.611	2.182	1.61	0.918	1.355	360
8	2.758	3023.64	688.474	2.153	1.631	0.918	1.32	420
9	2.767	3046.04	704.904	2.159	1.632	0.927	1.323	480
10	2.851	3118.88	755.57	2.16	1.68	0.932	1.286	540
11	2.8	3064.04	724.749	2.145	1.662	0.894	1.291	600
12	2.792	3058.98	731.621	2.112	1.683	0.936	1.255	660
13	2.8	3077.78	745.129	2.122	1.68	0.894	1.263	720
14	2.8	3176.53	770.041	2.137	1.668	0.916	1.281	780
15	2.8	3091.27	727.78	2.132	1.672	0.939	1.275	840
16	2.809	3184.92	777.309	2.116	1.69	0.935	1.252	900
#3
1	4.768	3029.03	546.963	3.437	1.766	0.618	1.945	0	Thresh = 1708
2	4.726	3083.74	517.354	2.99	2.013	0.87	1.486	60	Area > 2um^2
3	4.692	3049.95	508.591	2.847	2.099	0.887	1.357	120	Tau:	67.49	s
4	4.617	3094.76	504.44	2.767	2.125	0.901	1.302	180	Fusion Length:	1.71784	um
5	4.625	3103.39	510.326	2.752	2.139	0.908	1.287	240	Tau/FusLength:	39.2876	s/um
6	4.675	3103.16	521.452	2.731	2.18	0.836	1.253	300
7	4.65	3089.56	504.669	2.703	2.19	0.925	1.234	360
8	4.65	3123.89	513.531	2.698	2.194	0.92	1.229	420
9	4.659	3163.29	531.456	2.697	2.199	0.927	1.227	480
10	4.667	3203.04	540.428	2.703	2.198	0.916	1.23	540
11	4.692	3190.32	549.845	2.717	2.199	0.899	1.236	600
12	4.692	3192.88	546.678	2.701	2.212	0.921	1.221	660
13	4.701	3205.09	539.597	2.702	2.215	0.923	1.22	720
14	4.701	3301.83	560.768	2.695	2.221	0.935	1.213	780
15	4.701	3191.56	553.413	2.693	2.223	0.91	1.211	840
16	4.734	3288.12	574.626	2.693	2.238	0.929	1.203	900
#4
1	4.053	2822.61	508.503	3.055	1.689	0.631	1.809	0	Thresh = 1628
2	4.112	2870.2	484.367	2.843	1.841	0.845	1.544	60	Area > 2um^2
3	4.196	2945.06	508.063	2.811	1.901	0.863	1.479	120	Tau:	64.3	s
4	4.146	2920.64	487.888	2.768	1.907	0.864	1.452	180	Fusion Length:	1.51894	um
5	4.137	2950.87	496.633	2.757	1.911	0.862	1.443	240	Tau/FusLength:	42.3322	s/um
6	4.196	2959.24	497.817	2.788	1.916	0.875	1.455	300
7	4.221	2881.86	472.809	2.787	1.929	0.875	1.445	360
8	4.221	2863.68	472.503	2.745	1.958	0.88	1.402	420
9	4.162	2845.91	437.235	2.755	1.924	0.868	1.432	480
10	4.196	2901.51	474.372	2.741	1.949	0.875	1.406	540
11	4.205	2956.75	511.21	2.731	1.96	0.889	1.393	600
12	4.247	2970.39	508.942	2.747	1.968	0.885	1.396	660
13	4.213	2942.4	481.46	2.751	1.95	0.896	1.411	720
14	4.205	2956.84	484.2	2.727	1.963	0.901	1.389	780
15	4.221	2960.06	498.288	2.755	1.951	0.897	1.412	840
16	4.28	2981.25	521.629	2.747	1.984	0.88	1.385	900
#5
1	4.675	3530.5	589.13	3.496	1.703	0.591	2.053	0	Thresh = 2058
2	5.424	3721.28	556.638	3.245	2.128	0.853	1.525	60	Area > 2um^2
3	5.34	3680.53	534.69	3.071	2.214	0.886	1.387	120	Tau:	75.62	s
4	5.415	3663.53	545.691	2.986	2.309	0.91	1.293	180	Fusion Length:	1.74742	um
5	5.373	3674.29	540.421	2.975	2.3	0.903	1.293	240	Tau/FusLength:	43.2752	s/um
6	5.315	3569.35	492.209	2.931	2.309	0.909	1.269	300
7	5.298	3577.4	486.964	2.889	2.335	0.934	1.237	360
8	5.357	3525.48	495.398	2.888	2.362	0.9	1.223	420
9	5.323	3572.41	500.047	2.868	2.363	0.926	1.214	480
10	5.382	3639.07	528.281	2.865	2.392	0.909	1.198	540
11	5.382	3662.14	531.538	2.859	2.397	0.909	1.193	600
12	5.382	3606.65	527.408	2.855	2.4	0.932	1.19	660
13	5.407	3619.88	540.651	2.874	2.396	0.924	1.2	720
14	5.373	3649.13	546.266	2.829	2.419	0.923	1.169	780
15	5.432	3695.28	569.123	2.848	2.428	0.897	1.173	840
16	5.525	3790.45	616.265	2.85	2.468	0.928	1.155	900
#6
1	13	4287.14	544.526	6.177	2.68	0.548	2.305	0	Thresh = 2523
2	13.547	4348.03	553.354	5.996	2.877	0.722	2.084	60	Area > 2um^2
3	13.698	4542.16	608.764	5.544	3.146	0.81	1.762	120	Tau:	149.8	s
4	13.446	4621.62	619.452	5.266	3.251	0.843	1.62	180	Fusion Length:	3.06137	um
5	13.513	4629.66	634.836	5.195	3.312	0.847	1.568	240	Tau/FusLength:	48.9324	s/um
6	13.387	4695.49	633.013	5.116	3.332	0.859	1.535	300
7	13.387	4746.57	636.979	5.07	3.362	0.852	1.508	360
8	13.455	4844.9	682.716	5.013	3.417	0.863	1.467	420
9	13.37	4949.1	702.045	4.971	3.424	0.865	1.452	480
10	13.37	4986.69	714.446	4.936	3.449	0.865	1.431	540
11	13.286	4944.05	693.04	4.905	3.449	0.869	1.422	600
12	13.387	4978.81	697.417	4.891	3.485	0.875	1.404	660
13	13.379	5005.35	713.361	4.88	3.491	0.881	1.398	720
14	13.362	5089.68	741.198	4.858	3.502	0.88	1.387	780
15	13.379	5086.52	744.917	4.836	3.523	0.881	1.373	840
16	13.337	5111.27	744.451	4.796	3.541	0.869	1.354	900
#7
1	8.51	3650.21	574.296	4.98	2.176	0.535	2.289	0	Thresh = 2172
2	10.705	3764.55	490.447	4.593	2.968	0.855	1.548	60	Area > 2um^2
3	11.041	3834.57	522.822	4.456	3.155	0.865	1.412	120	Tau:	55.1	s
4	11.125	3851.48	522.966	4.401	3.219	0.864	1.367	180	Fusion Length:	2.47012	um
5	11.159	3844.68	509.273	4.346	3.27	0.892	1.329	240	Tau/FusLength:	22.3066	s/um
6	11.285	3837.99	516.934	4.344	3.308	0.895	1.313	300
7	11.268	3869.29	512.56	4.318	3.322	0.89	1.3	360
8	11.268	3898.07	522.416	4.287	3.347	0.88	1.281	420
9	11.235	3950.14	531.217	4.267	3.352	0.898	1.273	480
10	11.218	3934.02	532.45	4.235	3.373	0.897	1.256	540
11	11.218	3933.77	527.447	4.199	3.401	0.905	1.235	600
12	11.235	3933.63	528.582	4.198	3.408	0.917	1.232	660
13	11.167	3956.5	530.008	4.198	3.387	0.908	1.239	720
14	11.134	3964.18	534.291	4.173	3.397	0.898	1.228	780
15	11.108	3945.78	536.77	4.162	3.398	0.915	1.225	840
16	11.125	3947.85	529.025	4.153	3.411	0.905	1.217	900
#8
1	7.005	3415.19	561.7	4.096	2.178	0.538	1.881	0	Thresh = 1996
2	7.097	3430.51	496.487	3.736	2.419	0.83	1.545	60	Area > 2um^2
3	7.131	3414.28	492.797	3.686	2.463	0.859	1.497	120	Tau:	95.14	s
4	7.139	3414.7	486.197	3.598	2.526	0.869	1.424	180	Fusion Length:	2.04387	um
5	7.097	3423.76	497.513	3.509	2.575	0.886	1.363	240	Tau/FusLength:	46.549	s/um
6	7.072	3444.83	494.073	3.494	2.577	0.883	1.356	300
7	7.03	3448.17	495.963	3.496	2.561	0.891	1.365	360
8	6.996	3421.87	487.814	3.47	2.567	0.887	1.351	420
9	6.963	3461.1	504.422	3.42	2.592	0.883	1.319	480
10	6.971	3478.24	489.618	3.429	2.589	0.907	1.325	540
11	6.988	3481.78	511.167	3.404	2.613	0.9	1.303	600
12	6.988	3482.34	516.413	3.406	2.612	0.892	1.304	660
13	6.963	3508.65	504.527	3.425	2.588	0.906	1.323	720
14	6.946	3484.85	506.53	3.409	2.594	0.89	1.314	780
15	6.912	3528.18	511.638	3.397	2.591	0.886	1.311	840
16	6.921	3525.26	520.038	3.367	2.617	0.901	1.287	900
#9
1	7.871	4840.09	696.295	4.7	2.132	0.513	2.204	0	Thresh = 2879
2	8.317	4878.44	654.555	4.43	2.39	0.774	1.854	60	Area > 2um^2
3	8.249	4860.33	654.223	4.104	2.559	0.838	1.604	120	Tau:	92.96	s
4	8.241	4840.74	627.008	4.036	2.6	0.857	1.553	180	Fusion Length:	2.33987	um
5	8.249	4888.1	640.082	4.001	2.625	0.866	1.524	240	Tau/FusLength:	39.7288	s/um
6	8.232	4857.57	637.914	3.983	2.632	0.877	1.513	300
7	8.216	4852.76	629.437	3.953	2.646	0.866	1.494	360
8	8.157	4871.03	622.958	3.912	2.655	0.869	1.474	420
9	8.182	4816.47	620.936	3.897	2.673	0.871	1.458	480
10	8.19	4862.73	629.036	3.864	2.699	0.884	1.432	540
11	8.174	4887.25	622.429	3.884	2.679	0.879	1.45	600
12	8.157	4850.02	627.788	3.859	2.691	0.869	1.434	660
13	8.207	4854.18	637.988	3.87	2.7	0.886	1.433	720
14	8.157	4881.15	650.682	3.852	2.696	0.877	1.429	780
15	8.216	4867.62	659.884	3.858	2.711	0.871	1.423	840
16	8.14	4873	640.159	3.838	2.701	0.879	1.421	900
#10
1	10.385	3859.44	535.208	5.388	2.454	0.543	2.195	0	Thresh = 2294
2	11.47	3975.02	498.744	4.772	3.061	0.842	1.559	60	Area > 2um^2
3	11.411	3955.8	490.27	4.578	3.173	0.879	1.443	120	Tau:	48	s
4	11.487	3974.53	488.823	4.552	3.213	0.857	1.417	180	Fusion Length:	2.68329	um
5	11.436	3987.47	477.214	4.476	3.253	0.891	1.376	240	Tau/FusLength:	17.8885	s/um
6	11.369	3979.61	479.145	4.472	3.237	0.886	1.381	300
7	11.453	3977.08	496.675	4.47	3.263	0.878	1.37	360
8	11.369	3995.28	468.841	4.445	3.256	0.876	1.365	420
9	11.42	3937.8	462.859	4.428	3.284	0.879	1.348	480
10	11.369	3998.81	463.175	4.42	3.275	0.897	1.35	540
11	11.445	3982.68	469.496	4.418	3.298	0.881	1.339	600
12	11.428	3999.91	472.1	4.391	3.314	0.891	1.325	660
13	11.445	3973.11	466.752	4.392	3.318	0.889	1.324	720
14	11.403	3986.94	474.06	4.371	3.322	0.889	1.316	780
15	11.487	3955.07	476.009	4.39	3.331	0.885	1.318	840
16	11.445	3928.38	467.398	4.393	3.317	0.871	1.324	900
#12
1	8.199	3174.64	499.529	5.005	2.086	0.511	2.399	0	Thresh = 1878
2	8.872	3299.43	495.887	4.363	2.589	0.826	1.685	60	Area > 2um^2
3	8.653	3309.51	493.176	4.084	2.698	0.851	1.514	120	Tau:	67.11	s
4	8.645	3281.2	489.835	3.99	2.758	0.873	1.447	180	Fusion Length:	2.4676	um
5	8.577	3297.78	487.76	3.927	2.781	0.895	1.412	240	Tau/FusLength:	27.1965	s/um
6	8.51	3294.61	477.36	3.879	2.793	0.888	1.389	300
7	8.518	3268.48	467.358	3.836	2.828	0.886	1.357	360
8	8.476	3281.09	472.535	3.801	2.84	0.881	1.338	420
9	8.401	3294.37	474.142	3.75	2.852	0.874	1.315	480
10	8.451	3286.8	473.184	3.785	2.843	0.882	1.331	540
11	8.392	3298.98	468.217	3.76	2.842	0.897	1.323	600
12	8.468	3301.94	477.072	3.723	2.896	0.905	1.286	660
13	8.518	3290.13	478.002	3.756	2.888	0.889	1.301	720
14	8.451	3300.34	481.42	3.706	2.904	0.904	1.276	780
15	8.46	3304.72	480.97	3.706	2.906	0.917	1.275	840
16	8.392	3316.63	464.834	3.679	2.905	0.91	1.266	900
#13
1	22.192	4166.42	508.313	7.561	3.737	0.543	2.023	0	Thresh = 2449
2	22.671	4224.55	472.716	7.282	3.964	0.748	1.837	60	Area > 2um^2
3	22.805	4221.77	475.687	6.96	4.172	0.817	1.668	120	Tau:	100.1	s
4	22.856	4209.78	476.82	6.87	4.236	0.797	1.622	180	Fusion Length:	3.78025	um
5	22.864	4217.55	472.036	6.835	4.259	0.822	1.605	240	Tau/FusLength:	26.4797	s/um
6	22.873	4214.6	465.747	6.806	4.279	0.833	1.591	300
7	22.839	4203.89	458.791	6.754	4.306	0.844	1.569	360
8	23.007	4204.69	472.16	6.786	4.317	0.836	1.572	420
9	22.915	4213.04	474.757	6.738	4.33	0.833	1.556	480
10	22.948	4191.95	462.038	6.737	4.337	0.848	1.553	540
11	23.016	4199.53	473.889	6.746	4.344	0.851	1.553	600
12	22.932	4213.56	470.943	6.734	4.336	0.847	1.553	660
13	22.974	4197.51	477.524	6.734	4.344	0.835	1.55	720
14	22.974	4202.85	463.766	6.738	4.341	0.84	1.552	780
15	22.906	4201.37	464.187	6.718	4.341	0.851	1.548	840
16	22.94	4205.75	465.249	6.715	4.35	0.853	1.544	900
#14
1	24.597	4010.87	522.349	8.148	3.843	0.528	2.12	0	Thresh = 2351
2	25.446	4092.16	507.532	7.767	4.172	0.756	1.862	60	Area > 2um^2
3	25.572	4094.88	511.758	7.427	4.384	0.8	1.694	120	Tau:	99.13	s
4	25.665	4079.75	499.15	7.297	4.478	0.816	1.63	180	Fusion Length:	4.06745	um
5	25.723	4083.82	503.127	7.26	4.511	0.829	1.609	240	Tau/FusLength:	24.3716	s/um
6	25.782	4068.28	498.045	7.226	4.543	0.831	1.591	300
7	25.589	4062.66	489.061	7.154	4.554	0.835	1.571	360
8	25.631	4045.3	487.11	7.164	4.555	0.843	1.573	420
9	25.622	4035.09	488.502	7.13	4.575	0.841	1.558	480
10	25.631	4042.51	484.882	7.122	4.582	0.846	1.554	540
11	25.639	4031.31	479.192	7.101	4.597	0.835	1.545	600
12	25.564	4029.98	483.774	7.081	4.597	0.839	1.54	660
13	25.538	4016.59	473.538	7.089	4.587	0.836	1.546	720
14	25.631	4026.01	486.428	7.086	4.605	0.846	1.539	780
15	25.513	4018.28	479.573	7.042	4.613	0.855	1.527	840
16	25.614	3991.97	465.223	7.027	4.641	0.847	1.514	900
#15
1	21.401	3992.15	468.752	7.955	3.426	0.538	2.322	0	Thresh = 2370
2	21.855	4048.15	449.556	7.54	3.69	0.767	2.043	60	Area > 2um^2
3	22.116	4035.49	471.723	7.282	3.867	0.783	1.883	120	Tau:	94.52	s
4	22.183	4038.81	472.227	7.205	3.92	0.801	1.838	180	Fusion Length:	3.93908	um
5	22.175	4049.41	473.625	7.145	3.952	0.807	1.808	240	Tau/FusLength:	23.9954	s/um
6	22.25	4028.66	460.922	7.124	3.977	0.79	1.791	300
7	22.284	4033.79	470.711	7.097	3.998	0.798	1.775	360
8	22.25	4040.3	463.571	7.094	3.993	0.795	1.776	420
9	22.25	4042.74	478.432	7.059	4.013	0.813	1.759	480
10	22.166	4051.7	462.911	7.02	4.02	0.812	1.746	540
11	22.141	4038.26	475.905	7.024	4.014	0.804	1.75	600
12	22.183	4031.92	466.018	7.017	4.025	0.804	1.743	660
13	22.141	4047.23	461.176	6.998	4.029	0.809	1.737	720
14	22.082	4061.41	459.857	6.993	4.02	0.805	1.739	780
15	22.192	4059.58	466.634	6.988	4.043	0.809	1.728	840
16	22.175	4052.1	465.065	6.974	4.048	0.808	1.723	900

## Sheet: WT1to10000RNA
#1	Area	Mean Int	StDev Int	Major Axis	Minor Axis	Circ	AR	Time (s)	Thresh = 1328
1	5.743	2105.55	311.107	3.951	1.851	0.626	2.135	0	Area > 2um^2
2	5.819	2131.05	318.941	3.938	1.881	0.644	2.093	60	Tau:	424.1	s
3	5.903	2137.96	318.85	3.96	1.898	0.66	2.086	120	Fusion Length:	1.97157	um
4	5.928	2134.91	315.735	3.915	1.928	0.653	2.031	180	Tau/FusLength:	215.107	s/um
5	5.979	2131.69	320.241	3.928	1.938	0.688	2.027	240
6	6.012	2144.53	325.731	3.896	1.965	0.692	1.982	300
7	6.055	2175.3	335.195	3.891	1.981	0.677	1.964	360
8	6.189	2194.42	352.491	3.918	2.011	0.695	1.948	420
9	6.181	2206.64	341.081	3.915	2.01	0.711	1.947	480
10	6.214	2237.02	344.398	3.935	2.011	0.725	1.957	540
11	6.307	2194.21	352.259	3.935	2.041	0.725	1.929	600
12	6.324	2213.82	352.767	3.94	2.043	0.73	1.928	660
13	6.366	2209.29	345.66	3.936	2.059	0.735	1.912	720
14	6.391	2239.91	347.703	3.924	2.074	0.746	1.893	780
15	6.357	2235.06	342.594	3.903	2.074	0.731	1.882	840
16	6.391	2216.92	340.959	3.926	2.073	0.735	1.894	900
#2
1	6.172	2301.66	390.545	3.926	2.001	0.743	1.962	0	Thresh = 1449
2	6.492	2443.48	515.909	3.943	2.096	0.769	1.881	60	Area > 2um^2
3	6.786	2499.36	549.125	3.957	2.184	0.792	1.812	120	Tau:	331.3	s
4	6.82	2522.74	535.85	3.916	2.217	0.793	1.766	180	Fusion Length:	1.96263	um
5	6.929	2537.87	535.699	3.888	2.269	0.817	1.713	240	Tau/FusLength:	168.804	s/um
6	7.089	2566.03	546.579	3.871	2.332	0.815	1.66	300
7	7.148	2593.71	529.471	3.852	2.363	0.831	1.63	360
8	7.299	2599.06	519.964	3.873	2.399	0.831	1.614	420
9	7.366	2600.55	515.031	3.858	2.431	0.807	1.587	480
10	7.484	2613.96	508.523	3.876	2.458	0.835	1.577	540
11	7.509	2596.28	483.048	3.878	2.466	0.834	1.573	600
12	7.602	2606.29	476.391	3.891	2.487	0.824	1.565	660
13	7.72	2601.65	472.98	3.891	2.526	0.825	1.541	720
14	7.795	2624.17	466.677	3.873	2.562	0.845	1.512	780
15	7.846	2599.66	461.761	3.881	2.574	0.831	1.508	840
16	7.871	2590.44	444.276	3.877	2.585	0.85	1.5	900
#3
1	2.809	2244.96	437.94	2.63	1.36	0.77	1.934	0	Thresh = 1411
2	2.943	2355.45	466.341	2.555	1.467	0.812	1.742	60	Area > 2um^2
3	3.019	2450.1	509.575	2.513	1.529	0.827	1.643	120	Tau:	220.9	s
4	3.137	2546.39	520.2	2.48	1.61	0.846	1.54	180	Fusion Length:	1.31423	um
5	3.204	2609.53	539.464	2.479	1.645	0.864	1.507	240	Tau/FusLength:	168.083	s/um
6	3.28	2696.78	548.971	2.455	1.701	0.905	1.444	300
7	3.338	2708.92	549.694	2.464	1.725	0.854	1.428	360
8	3.414	2720.95	550.02	2.438	1.783	0.907	1.367	420
9	3.481	2725.83	530.294	2.462	1.801	0.885	1.367	480
10	3.574	2741.62	543.914	2.47	1.842	0.909	1.341	540
11	3.641	2693.67	527.51	2.498	1.856	0.898	1.346	600
12	3.708	2738.51	540.841	2.491	1.895	0.915	1.314	660
13	3.742	2749.43	520.763	2.489	1.915	0.904	1.3	720
14	3.826	2787.09	537.34	2.505	1.945	0.905	1.288	780
15	3.835	2731.44	500.354	2.505	1.949	0.912	1.285	840
16	3.843	2732.61	486.423	2.504	1.954	0.928	1.282	900
#4
1	4.869	2938.4	536.901	3.729	1.662	0.659	2.243	0	Thresh = 1774
2	5.331	3115.14	570.625	3.687	1.841	0.742	2.002	60	Area > 2um^2
3	5.516	3148.64	549.856	3.639	1.93	0.759	1.886	120	Tau:	273.6	s
4	5.802	3163.33	546.294	3.628	2.037	0.798	1.781	180	Fusion Length:	1.85347	um
5	5.895	3152.53	515.795	3.58	2.096	0.811	1.708	240	Tau/FusLength:	147.615	s/um
6	6.231	3188.91	534.381	3.614	2.195	0.813	1.646	300
7	6.433	3194.32	514.97	3.6	2.275	0.83	1.583	360
8	6.643	3213.96	505.688	3.62	2.337	0.844	1.549	420
9	6.761	3183.41	486.117	3.597	2.393	0.853	1.503	480
10	6.887	3159.63	469.813	3.606	2.432	0.869	1.483	540
11	7.072	3156.07	471.89	3.626	2.483	0.836	1.46	600
12	7.19	3149.63	451.398	3.616	2.532	0.862	1.428	660
13	7.299	3107.44	443.919	3.633	2.558	0.879	1.42	720
14	7.442	3105.8	434.415	3.637	2.605	0.883	1.396	780
15	7.551	3087.64	435.531	3.639	2.642	0.883	1.377	840
16	7.543	3065.41	409.693	3.606	2.663	0.895	1.354	900
#5
1	3.052	2015.85	364.937	2.668	1.457	0.783	1.831	0	Thresh = 1298
2	3.128	2047.8	367.391	2.656	1.499	0.833	1.772	60	Area > 2um^2
3	3.397	2179.89	456.598	2.712	1.595	0.84	1.7	120	Tau:	449.4	s
4	3.65	2259.3	478.026	2.78	1.672	0.816	1.663	180	Fusion Length:	1.32832	um
5	3.801	2329.56	473.543	2.776	1.744	0.838	1.592	240	Tau/FusLength:	338.323	s/um
6	3.961	2312.8	459.875	2.817	1.79	0.821	1.574	300
7	4.129	2347.02	459.133	2.829	1.858	0.844	1.523	360
8	4.263	2343.25	458.55	2.849	1.905	0.843	1.495	420
9	4.381	2345.49	450.243	2.893	1.928	0.839	1.5	480
10	4.474	2342.13	439.395	2.887	1.973	0.857	1.463	540
11	4.65	2360.11	440.226	2.915	2.031	0.852	1.435	600
12	4.717	2340.9	436.776	2.914	2.061	0.853	1.414	660
13	4.793	2322.7	416.866	2.944	2.073	0.867	1.42	720
14	4.869	2344.55	411.081	2.93	2.116	0.869	1.385	780
15	4.978	2333.11	412.097	2.945	2.152	0.847	1.369	840
16	5.045	2339.96	412.476	2.956	2.173	0.863	1.36	900
#6
1	9.04	1972.93	272.587	5.055	2.277	0.583	2.22	0	Thresh = 1236
2	9.073	1949.99	258.252	5.044	2.29	0.617	2.202	60	Area > 2um^2
3	9.208	1957.85	252.635	5.054	2.32	0.631	2.179	120	Tau:	780.6	s
4	9.25	1952.08	250.702	5.024	2.344	0.663	2.143	180	Fusion Length:	2.51506	um
5	9.292	1936.7	235.978	5.001	2.366	0.687	2.114	240	Tau/FusLength:	310.371	s/um
6	9.317	1908.77	231.387	4.986	2.379	0.697	2.096	300
7	9.418	1910.55	236.406	4.996	2.4	0.697	2.081	360
8	9.46	1897.34	229.295	4.979	2.419	0.714	2.058	420
9	9.477	1881.03	215.623	4.956	2.435	0.715	2.036	480
10	9.544	1885.77	220.576	4.952	2.454	0.714	2.018	540
11	9.536	1882.18	210.465	4.936	2.46	0.722	2.007	600
12	9.62	1878.55	211.377	4.947	2.476	0.737	1.998	660
13	9.553	1859.07	203.874	4.923	2.47	0.732	1.993	720
14	9.603	1852.39	208.039	4.917	2.487	0.748	1.977	780
15	9.628	1879.01	211.451	4.886	2.509	0.738	1.947	840
16	9.704	1886.93	208.782	4.909	2.517	0.753	1.951	900
#7
1	3.868	2553.29	432.514	2.939	1.676	0.678	1.753	0	Thresh = 1627
2	3.902	2590.41	424.316	2.857	1.739	0.747	1.643	60	Area > 2um^2
3	3.969	2671.73	404.895	2.868	1.762	0.785	1.628	120	Tau:	473.6	s
4	3.986	2750.06	387.198	2.858	1.776	0.815	1.61	180	Fusion Length:	1.45492	um
5	4.087	2707.55	381.24	2.903	1.793	0.809	1.619	240	Tau/FusLength:	325.517	s/um
6	4.129	2700.86	372.578	2.895	1.816	0.828	1.595	300
7	4.205	2728.34	379.556	2.879	1.86	0.843	1.548	360
8	4.263	2699.17	373.095	2.869	1.892	0.843	1.516	420
9	4.213	2709.51	349.077	2.844	1.886	0.85	1.508	480
10	4.28	2760.99	367.272	2.852	1.911	0.863	1.492	540
11	4.322	2746.82	368.372	2.875	1.914	0.855	1.502	600
12	4.339	2725.58	352.108	2.857	1.934	0.863	1.478	660
13	4.381	2759.65	371.959	2.863	1.948	0.867	1.47	720
14	4.406	2758.84	364.344	2.855	1.965	0.884	1.453	780
15	4.474	2714.74	364.441	2.877	1.98	0.88	1.453	840
16	4.44	2711.71	347.908	2.856	1.979	0.862	1.443	900
#8
1	7.669	1871.48	230.907	4.604	2.121	0.56	2.171	0	Thresh = 1195
2	7.837	1890.19	242.722	4.624	2.158	0.615	2.143	60	Area > 2um^2
3	7.854	1883.34	235.981	4.625	2.162	0.624	2.139	120	Tau:	417.2	s
4	7.854	1874.46	227.507	4.61	2.169	0.648	2.125	180	Fusion Length:	2.29487	um
5	7.93	1896.05	235.696	4.609	2.191	0.656	2.104	240	Tau/FusLength:	181.797	s/um
6	7.947	1892.39	235.083	4.617	2.192	0.655	2.106	300
7	7.997	1882.95	234.539	4.616	2.206	0.662	2.093	360
8	7.989	1876.03	224.612	4.615	2.204	0.659	2.094	420
9	8.022	1867.28	226.949	4.608	2.217	0.678	2.078	480
10	7.955	1865.15	213.731	4.587	2.208	0.678	2.078	540
11	8.005	1855.29	211.616	4.6	2.216	0.691	2.076	600
12	8.056	1851.75	214.604	4.61	2.225	0.696	2.072	660
13	8.09	1857.34	210.792	4.601	2.239	0.675	2.055	720
14	8.073	1826.44	200.846	4.615	2.227	0.697	2.072	780
15	8.047	1816.58	193.628	4.583	2.236	0.689	2.05	840
16	8.031	1811.97	195.414	4.588	2.229	0.687	2.058	900
#10
1	4.356	2280.49	429.442	3.38	1.641	0.728	2.06	0	Thresh = 1451
2	4.398	2302.86	420.096	3.352	1.671	0.735	2.006	60	Area > 2um^2
3	4.457	2308.27	408.571	3.344	1.697	0.745	1.971	120	Tau:	633.1	s
4	4.532	2303.82	406.034	3.324	1.736	0.748	1.915	180	Fusion Length:	1.68929	um
5	4.591	2318.04	405.06	3.339	1.751	0.758	1.907	240	Tau/FusLength:	374.773	s/um
6	4.633	2333.03	413.316	3.328	1.773	0.769	1.877	300
7	4.675	2326.12	395.582	3.308	1.8	0.781	1.838	360
8	4.717	2319.87	390.722	3.313	1.813	0.788	1.827	420
9	4.751	2303.45	385.844	3.325	1.819	0.775	1.827	480
10	4.76	2281.23	370.229	3.285	1.845	0.799	1.78	540
11	4.776	2272.48	355.486	3.28	1.854	0.798	1.769	600
12	4.81	2239.44	347.769	3.27	1.873	0.808	1.746	660
13	4.894	2215.38	343.107	3.273	1.904	0.798	1.719	720
14	4.911	2204.63	329.015	3.269	1.913	0.811	1.709	780
15	4.894	2207.2	319.698	3.265	1.908	0.808	1.711	840
16	4.911	2207.64	318.089	3.258	1.919	0.811	1.698	900
#11
1	4.692	1332.27	194.55	3.382	1.766	0.69	1.915	0	Thresh = 906
2	4.768	1343.45	196.333	3.398	1.786	0.694	1.902	60	Area > 2um^2
3	4.818	1355.87	194.151	3.402	1.804	0.734	1.886	120	Tau:	529.9	s
4	5.045	1393.86	205.982	3.454	1.86	0.738	1.857	180	Fusion Length:	1.68934	um
5	5.079	1397.09	200.285	3.441	1.879	0.743	1.831	240	Tau/FusLength:	313.674	s/um
6	5.071	1399.88	189.762	3.42	1.888	0.742	1.812	300
7	5.121	1390.93	190.057	3.436	1.897	0.758	1.811	360
8	5.163	1404.75	192.289	3.463	1.898	0.764	1.825	420
9	5.205	1396.83	188.773	3.452	1.92	0.802	1.798	480
10	5.23	1391.01	185.863	3.447	1.932	0.793	1.784	540
11	5.197	1395.78	182.036	3.437	1.925	0.801	1.786	600
12	5.23	1369.53	175.012	3.444	1.934	0.774	1.781	660
13	5.34	1377.71	184.353	3.451	1.97	0.8	1.752	720
14	5.315	1363.84	177.78	3.424	1.976	0.805	1.733	780
15	5.247	1370.73	168.827	3.441	1.942	0.799	1.772	840
16	5.348	1380.81	177.869	3.447	1.975	0.801	1.745	900
#13
1	2.725	1696.96	289.033	2.793	1.242	0.609	2.249	0	Thresh = 1117
2	2.842	1708.22	289.192	2.784	1.3	0.676	2.142	60	Area > 2um^2
3	2.867	1712.42	273.865	2.77	1.318	0.697	2.101	120	Tau:	387.6	s
4	2.884	1703.49	264.345	2.763	1.329	0.692	2.079	180	Fusion Length:	1.38793	um
5	2.91	1688.61	252.449	2.772	1.336	0.718	2.074	240	Tau/FusLength:	279.265	s/um
6	2.952	1667.04	245.345	2.753	1.365	0.75	2.017	300
7	2.893	1670.2	228.263	2.709	1.359	0.735	1.993	360
8	2.935	1659.2	233.855	2.726	1.371	0.73	1.989	420
9	2.935	1651.28	223.576	2.707	1.38	0.73	1.961	480
10	2.943	1646.65	216.584	2.721	1.377	0.76	1.975	540
11	2.977	1652.01	219.951	2.743	1.382	0.745	1.986	600
12	3.027	1654.63	234.315	2.726	1.414	0.758	1.928	660
13	3.027	1646.12	226.113	2.699	1.428	0.758	1.889	720
14	3.002	1656.84	223.992	2.686	1.423	0.747	1.888	780
15	3.01	1655.71	230.081	2.711	1.414	0.754	1.917	840
16	2.968	1642.6	216.643	2.669	1.416	0.776	1.885	900

## Sheet: WT1to3000RNA
#1	Area	Mean Int	StDev Int	Major Axis	Minor Axis	Angle	Circ	Median Int	AR	Round	Solidity	Time (s)	Thresh = 1059
1	2.994	1749.62	371.689	2.542	1.499	30.144	0.761	1769	1.696	0.59	0.875	0	Area > 2um^2
2	2.859	1839.82	409.303	2.286	1.592	22.043	0.882	1876	1.436	0.696	0.934	60	Tau:	118.6	s
3	2.758	1852.07	422.25	2.103	1.67	20.941	0.941	1892	1.26	0.794	0.948	120	Fusion Length:	1.25038	um
4	2.565	1862.1	442.565	1.955	1.671	25.662	0.93	1928	1.17	0.855	0.941	180	Tau/FusLength:	94.851	s/um
5	2.481	1861.37	433.944	1.863	1.695	9.962	0.941	1907	1.099	0.91	0.939	240
6	2.422	1879.26	442.14	1.817	1.697	14.763	0.919	1937	1.071	0.934	0.932	300
7	2.455	1888.57	452.825	1.814	1.724	15.301	0.931	1937	1.052	0.95	0.94	360
8	2.489	1892.38	460.407	1.811	1.75	18.885	0.944	1945	1.035	0.966	0.943	420
9	2.439	1859.85	451.256	1.784	1.74	9.131	0.942	1912	1.025	0.975	0.939	480
10	2.43	1849.09	441.914	1.798	1.721	2.782	0.939	1879	1.045	0.957	0.937	540
11	2.439	1876.65	454.465	1.775	1.749	11.795	0.968	1902	1.015	0.985	0.951	600
12	2.447	1876.17	459.38	1.77	1.76	154.778	0.946	1907	1.006	0.994	0.943	660
13	2.472	1861.34	481.79	1.797	1.752	81.553	0.913	1863	1.026	0.975	0.929	720
14	2.455	1875.63	479.86	1.773	1.763	32.99	0.956	1877	1.006	0.994	0.95	780
15	2.439	1880.17	487.514	1.784	1.74	33.567	0.942	1894	1.025	0.975	0.939	840
16	2.43	1873.73	478.246	1.778	1.74	10.394	0.922	1887	1.022	0.978	0.934	900
#2
1	5.012	1949.87	366.091	3.795	1.682	2.2	0.649	1991	2.257	0.443	0.875	0	Thresh = 1223
2	5.188	2019.7	375.436	3.635	1.817	1.596	0.744	2119	2	0.5	0.915	60	Area > 2um^2
3	5.197	2074.5	388.468	3.476	1.903	0.768	0.798	2200	1.826	0.547	0.941	120	Tau:	259.2	s
4	5.13	2082.15	382.989	3.354	1.947	1.33	0.81	2193	1.722	0.581	0.95	180	Fusion Length:	1.88522	um
5	5.003	2081.95	393.118	3.264	1.952	0.398	0.839	2204	1.672	0.598	0.954	240	Tau/FusLength:	137.49	s/um
6	4.961	2092.04	407.082	3.19	1.98	178.852	0.868	2192	1.611	0.621	0.96	300
7	4.886	2093.99	398.066	3.087	2.015	179.054	0.893	2194	1.532	0.653	0.964	360
8	4.902	2087.92	390.72	3.013	2.072	178.878	0.908	2204	1.454	0.688	0.964	420
9	4.953	2109.63	410.59	3.015	2.091	179.048	0.873	2223	1.442	0.694	0.948	480
10	4.877	2102.51	383.118	2.956	2.101	178.764	0.887	2214	1.407	0.711	0.951	540
11	4.97	2116.2	406.687	2.964	2.135	178.67	0.85	2231	1.388	0.72	0.95	600
12	4.852	2097.29	390.181	2.896	2.133	178.151	0.894	2216	1.358	0.737	0.953	660
13	4.86	2097.2	393.978	2.866	2.159	177.477	0.912	2211	1.327	0.754	0.959	720
14	4.827	2083.88	371.072	2.861	2.148	177.334	0.901	2198	1.332	0.751	0.954	780
15	4.802	2067.12	359.351	2.824	2.165	177.133	0.879	2197	1.305	0.766	0.945	840
16	4.81	2084.59	356.895	2.809	2.18	176.956	0.926	2208	1.288	0.776	0.958	900
#3
1	3.128	1579.41	268.424	2.792	1.426	6.512	0.733	1650	1.957	0.511	0.9	0	Thresh = 1008
2	3.12	1590.47	259.296	2.686	1.479	8.669	0.803	1677	1.817	0.551	0.925	60	Area > 2um^2
3	3.17	1580.68	275.933	2.595	1.556	9.151	0.847	1647	1.668	0.6	0.938	120	Tau:	218.9	s
4	3.137	1600.14	288.24	2.481	1.61	10.195	0.871	1678	1.541	0.649	0.944	180	Fusion Length:	1.39568	um
5	3.103	1604.77	280.021	2.424	1.63	10.605	0.876	1702	1.487	0.672	0.94	240	Tau/FusLength:	156.841	s/um
6	3.086	1606.83	286.317	2.384	1.648	11.088	0.885	1700	1.446	0.691	0.937	300
7	3.137	1619.76	296.591	2.375	1.681	14.208	0.879	1695	1.413	0.708	0.944	360
8	3.069	1597.34	284.513	2.344	1.667	12.656	0.88	1686	1.406	0.711	0.938	420
9	3.061	1606.51	284.519	2.307	1.689	10.752	0.878	1681	1.366	0.732	0.935	480
10	3.061	1597.31	291.517	2.29	1.702	12.505	0.913	1686	1.346	0.743	0.948	540
11	3.019	1584.83	286.56	2.25	1.708	12.17	0.91	1633	1.317	0.759	0.951	600
12	3.019	1591.93	291.963	2.256	1.704	13.812	0.901	1660	1.324	0.756	0.942	660
13	3.069	1606.48	293.814	2.229	1.753	12.107	0.916	1684	1.272	0.786	0.948	720
14	3.111	1609.52	293.622	2.249	1.762	11.876	0.928	1681	1.277	0.783	0.954	780
15	3.12	1599.85	294.299	2.258	1.759	14.544	0.909	1687	1.283	0.779	0.945	840
16	3.103	1595.45	284.956	2.251	1.755	13.483	0.926	1662	1.283	0.779	0.952	900
#5
1	2.632	1407.58	265.231	2.579	1.3	127.885	0.717	1453	1.984	0.504	0.869	0	Thresh = 879
2	2.741	1450.14	288.934	2.437	1.432	129.292	0.826	1503	1.701	0.588	0.917	60	Area > 2um^2
3	2.783	1490.71	297.177	2.375	1.492	129.492	0.861	1545	1.591	0.628	0.93	120	Tau:	193.8	s
4	2.952	1512.62	313.692	2.328	1.614	130.612	0.898	1576	1.443	0.693	0.941	180	Fusion Length:	1.28946	um
5	2.952	1507.29	307.647	2.305	1.63	132.571	0.863	1579	1.414	0.707	0.921	240	Tau/FusLength:	150.296	s/um
6	2.952	1509.41	308.71	2.25	1.67	134.796	0.92	1557	1.347	0.742	0.945	300
7	2.985	1496.58	302.737	2.238	1.698	134.989	0.893	1549	1.318	0.759	0.937	360
8	3.019	1521	302.804	2.229	1.725	132.818	0.889	1589	1.292	0.774	0.932	420
9	2.994	1498.5	298.471	2.202	1.731	134.862	0.896	1548	1.272	0.786	0.936	480
10	2.994	1496.76	296.167	2.17	1.756	136.793	0.917	1532	1.236	0.809	0.941	540
11	2.968	1474.13	282.246	2.168	1.744	137.167	0.909	1513	1.243	0.804	0.94	600
12	2.968	1464.77	276.592	2.16	1.75	135.562	0.909	1546	1.234	0.81	0.938	660
13	2.977	1453.77	273.225	2.158	1.757	136.878	0.912	1530	1.228	0.814	0.94	720
14	3.103	1504.35	300.163	2.17	1.821	138.309	0.935	1576	1.192	0.839	0.947	780
15	3.212	1513.47	307.595	2.172	1.883	141.373	0.909	1569	1.153	0.867	0.937	840
16	3.406	1498.08	320.655	2.194	1.976	151.683	0.86	1548	1.11	0.901	0.932	900
#6
1	3.893	1676.88	327.576	3.041	1.63	122.688	0.746	1725	1.865	0.536	0.882	0	Thresh = 1028
2	3.885	1769.18	353.287	2.851	1.735	123.28	0.857	1855	1.644	0.608	0.935	60	Area > 2um^2
3	3.759	1819.6	364.42	2.658	1.801	123.692	0.876	1909	1.476	0.678	0.944	120	Tau:	161	s
4	3.75	1832.25	379.418	2.541	1.88	123.009	0.919	1932	1.352	0.74	0.953	180	Fusion Length:	1.51655	um
5	3.666	1868.51	384.205	2.465	1.894	124.525	0.912	1950	1.301	0.768	0.947	240	Tau/FusLength:	106.162	s/um
6	3.683	1882.53	399.265	2.399	1.955	126.673	0.928	1976	1.227	0.815	0.953	300
7	3.65	1874.58	400.179	2.364	1.966	123.542	0.914	1975	1.203	0.831	0.945	360
8	3.7	1870.71	408.656	2.358	1.998	123.148	0.913	1960	1.18	0.847	0.945	420
9	3.658	1871.74	411.026	2.327	2.002	124.573	0.902	1948	1.162	0.86	0.941	480
10	3.641	1884.56	408.11	2.31	2.007	125.811	0.912	1976	1.151	0.869	0.943	540
11	3.624	1892.05	410.026	2.289	2.016	125.653	0.927	1968	1.136	0.881	0.951	600
12	3.641	1884.07	420.181	2.282	2.032	123.874	0.932	1972	1.123	0.89	0.947	660
13	3.641	1899.61	420.829	2.298	2.018	125.766	0.917	2000	1.139	0.878	0.946	720
14	3.607	1920.68	420.119	2.268	2.026	121.122	0.937	2002	1.12	0.893	0.95	780
15	3.658	1907.8	418.837	2.297	2.028	126.614	0.936	1982	1.133	0.883	0.951	840
16	3.65	1901.75	413.242	2.282	2.037	124.252	0.914	1989	1.12	0.893	0.938	900
#7
1	2.867	1804.61	494.554	2.607	1.4	156.66	0.774	1643	1.862	0.537	0.908	0	Thresh = 1145
2	3.069	1916.9	483.749	2.541	1.538	159.749	0.841	1879	1.652	0.605	0.931	60	Area > 2um^2
3	3.237	1975.92	495.234	2.421	1.703	159.442	0.887	1993	1.422	0.703	0.942	120	Tau:	167.6	s
4	3.422	2024.66	512.485	2.381	1.83	158.462	0.923	2037	1.301	0.769	0.947	180	Fusion Length:	1.29992	um
5	3.406	2050.85	511.095	2.299	1.886	156.782	0.899	2111	1.219	0.82	0.936	240	Tau/FusLength:	128.931	s/um
6	3.338	2042.78	500.461	2.227	1.909	159.003	0.936	2112	1.166	0.857	0.952	300
7	3.313	2058.03	493.226	2.197	1.92	157.19	0.944	2134	1.144	0.874	0.952	360
8	3.355	2055.46	509.126	2.157	1.98	156.156	0.926	2119	1.089	0.918	0.947	420
9	3.33	2071.91	508.141	2.133	1.988	148.449	0.933	2152	1.073	0.932	0.949	480
10	3.28	2059.52	491.096	2.091	1.997	144.813	0.956	2129	1.047	0.955	0.954	540
11	3.347	2037.8	494.31	2.121	2.009	150.629	0.953	2089	1.056	0.947	0.953	600
12	3.355	2018.89	485.454	2.111	2.024	158.257	0.92	2071	1.043	0.959	0.939	660
13	3.338	2044.26	492.868	2.099	2.025	157.147	0.951	2091	1.036	0.965	0.951	720
14	3.38	2037.63	502.985	2.103	2.046	151.251	0.941	2091	1.028	0.973	0.948	780
15	3.448	2041.15	502.604	2.131	2.06	151.195	0.93	2073	1.034	0.967	0.947	840
16	3.347	2016.67	472.856	2.082	2.046	152.644	0.932	2060	1.018	0.983	0.944	900
#8
1	4.289	2082.54	510.979	3.482	1.568	84.471	0.626	1971	2.221	0.45	0.863	0	Thresh = 1195
2	4.532	2156.3	546.995	3.323	1.737	83.866	0.734	2072	1.913	0.523	0.919	60	Area > 2um^2
3	4.398	2163.39	549.682	3.12	1.794	84.235	0.804	2098	1.739	0.575	0.931	120	Tau:	219.7	s
4	4.457	2207.11	556.004	3.034	1.87	83.885	0.821	2170	1.622	0.616	0.942	180	Fusion Length:	1.73238	um
5	4.154	2187.93	548.101	2.795	1.893	84.212	0.871	2138	1.477	0.677	0.949	240	Tau/FusLength:	126.82	s/um
6	4.12	2205.32	549.761	2.692	1.949	84.883	0.881	2169	1.381	0.724	0.951	300
7	4.146	2195.18	544.436	2.663	1.982	84.437	0.894	2180	1.344	0.744	0.947	360
8	4.036	2181.67	542.14	2.542	2.022	84.651	0.901	2152	1.257	0.795	0.95	420
9	4.02	2177.16	558.808	2.512	2.038	83.996	0.897	2128	1.233	0.811	0.945	480
10	3.994	2206.11	541.672	2.484	2.047	82.548	0.904	2185	1.214	0.824	0.944	540
11	4.028	2211.32	538.791	2.464	2.081	80.721	0.899	2194	1.184	0.844	0.948	600
12	4.036	2207.07	521.615	2.469	2.082	79.06	0.883	2178	1.186	0.843	0.946	660
13	4.129	2183.82	503.772	2.477	2.123	78.107	0.921	2185	1.167	0.857	0.951	720
14	4.045	2193.79	505.056	2.419	2.129	76.891	0.929	2210	1.136	0.88	0.951	780
15	4.078	2165.9	491.925	2.422	2.144	86.135	0.923	2165	1.13	0.885	0.948	840
16	4.154	2178.28	514.6	2.435	2.172	80.504	0.89	2179	1.121	0.892	0.945	900
#9
1	3.977	1419.27	277.508	3.403	1.488	131.335	0.602	1428	2.287	0.437	0.843	0	Thresh = 944
2	4.095	1421.03	258.403	3.309	1.576	131.043	0.733	1432	2.1	0.476	0.881	60	Area > 2um^2
3	4.112	1447.14	262.989	3.211	1.63	131.741	0.749	1465	1.969	0.508	0.891	120	Tau:	348.5	s
4	4.104	1463.7	266.153	3.149	1.659	132.145	0.777	1481	1.898	0.527	0.906	180	Fusion Length:	1.68805	um
5	4.129	1468.35	269.489	3.119	1.686	131.761	0.782	1488	1.85	0.54	0.906	240	Tau/FusLength:	206.451	s/um
6	4.12	1471.93	263.168	3.065	1.712	131.686	0.795	1504	1.79	0.559	0.92	300
7	4.129	1490.84	263.78	3.046	1.726	130.977	0.835	1528	1.765	0.567	0.933	360
8	4.137	1487.84	264.664	3.021	1.744	131.252	0.794	1514	1.732	0.577	0.921	420
9	4.112	1474.51	253.333	2.987	1.753	131.051	0.831	1509	1.704	0.587	0.937	480
10	4.137	1485.51	259.591	2.941	1.791	130.966	0.836	1524	1.642	0.609	0.934	540
11	4.179	1490.11	253.674	2.933	1.814	130.798	0.85	1525	1.617	0.618	0.939	600
12	4.188	1480.12	244.913	2.913	1.831	131.456	0.863	1519	1.591	0.629	0.945	660
13	4.179	1494.56	240.7	2.898	1.836	131.01	0.84	1540	1.579	0.633	0.938	720
14	4.213	1486.41	241.426	2.873	1.867	131.314	0.861	1537	1.539	0.65	0.944	780
15	3.952	1368.98	190.217	2.765	1.82	130.932	0.854	1394	1.519	0.658	0.934	840
16	4.154	1482.18	235.603	2.824	1.873	132.593	0.873	1525	1.508	0.663	0.943	900
#10
1	5.113	2077.13	436.459	3.991	1.631	56.17	0.616	2109	2.447	0.409	0.839	0	Thresh = 1299
2	5.197	2083.84	430.109	3.933	1.682	56.201	0.663	2095	2.338	0.428	0.864	60	Area > 2um^2
3	5.323	2118.13	442.72	3.895	1.74	55.542	0.713	2138	2.238	0.447	0.887	120	Tau:	342.1	s
4	5.281	2134.74	434.076	3.856	1.744	55.709	0.712	2172	2.212	0.452	0.894	180	Fusion Length:	1.96193	um
5	5.315	2142.77	429.474	3.8	1.781	55.764	0.728	2214	2.134	0.469	0.911	240	Tau/FusLength:	174.369	s/um
6	5.323	2133.9	421.954	3.775	1.795	55.837	0.737	2202	2.103	0.476	0.913	300
7	5.306	2135.23	424.39	3.724	1.814	55.651	0.755	2205	2.053	0.487	0.925	360
8	5.315	2130.98	419.395	3.688	1.835	55.832	0.76	2194	2.01	0.498	0.925	420
9	5.306	2142.59	423.434	3.646	1.853	55.29	0.764	2204	1.967	0.508	0.924	480
10	5.272	2115.43	398.542	3.652	1.838	55.231	0.772	2180	1.987	0.503	0.937	540
11	5.331	2121.5	410.466	3.616	1.877	55.189	0.78	2186	1.926	0.519	0.937	600
12	5.298	2128.14	409.773	3.61	1.868	55.802	0.788	2193	1.933	0.517	0.938	660
13	5.306	2124.06	417.314	3.561	1.897	55.689	0.789	2180	1.876	0.533	0.938	720
14	5.289	2141.02	414.676	3.552	1.896	55.438	0.792	2192	1.874	0.534	0.94	780
15	5.272	2137.26	403.896	3.555	1.888	55.917	0.781	2196	1.883	0.531	0.936	840
16	4.936	1933.15	301.999	3.474	1.809	56.582	0.778	1986	1.921	0.521	0.94	900
#11
1	4.583	2116.61	459.976	3.641	1.603	75.979	0.534	2146	2.272	0.44	0.808	0	Thresh = 1360
2	4.877	2137.61	435.197	3.611	1.72	76.509	0.667	2157	2.1	0.476	0.866	60	Area > 2um^2
3	5.029	2153.73	412.444	3.583	1.787	76.648	0.726	2203	2.005	0.499	0.9	120	Tau:	267.7	s
4	5.188	2180.39	412.52	3.501	1.887	76.913	0.77	2214	1.855	0.539	0.924	180	Fusion Length:	1.80746	um
5	5.365	2225.09	407.534	3.465	1.972	76.396	0.797	2330	1.757	0.569	0.941	240	Tau/FusLength:	148.108	s/um
6	5.441	2234.92	405.425	3.411	2.031	77.454	0.817	2336	1.679	0.595	0.953	300
7	5.483	2245.4	396.22	3.359	2.078	77.756	0.852	2342	1.617	0.619	0.951	360
8	5.533	2224.22	395.641	3.352	2.102	77.422	0.849	2321	1.595	0.627	0.956	420
9	5.567	2235.51	397.706	3.346	2.118	78.054	0.84	2328	1.58	0.633	0.953	480
10	5.659	2213.93	389.805	3.339	2.158	78.33	0.854	2303	1.547	0.646	0.955	540
11	5.76	2222.82	396.462	3.33	2.203	79.079	0.845	2342	1.512	0.662	0.95	600
12	5.853	2219.32	402.093	3.332	2.236	79.198	0.818	2328	1.49	0.671	0.942	660
13	5.827	2176.25	378.011	3.336	2.224	79.988	0.828	2287	1.5	0.667	0.947	720
14	5.895	2182.6	384.572	3.327	2.256	80.562	0.851	2285	1.475	0.678	0.95	780
15	5.886	2179.78	375.972	3.293	2.276	80.582	0.878	2297	1.447	0.691	0.957	840
16	5.937	2164.96	374.077	3.277	2.307	80.892	0.871	2272	1.421	0.704	0.957	900
#12
1	3.313	2154.62	505.723	3.135	1.346	118.364	0.581	2148	2.329	0.429	0.817	0	Thresh = 1322
2	3.296	2198.79	473.937	2.98	1.409	117.628	0.731	2198	2.116	0.473	0.871	60	Area > 2um^2
3	3.33	2221.26	462.976	2.906	1.459	118.725	0.756	2289	1.992	0.502	0.887	120	Tau:	275.8	s
4	3.347	2239.4	465.067	2.828	1.507	119.015	0.775	2302	1.876	0.533	0.899	180	Fusion Length:	1.55177	um
5	3.338	2237.68	456.29	2.732	1.556	121.371	0.801	2295	1.757	0.569	0.905	240	Tau/FusLength:	177.732	s/um
6	3.28	2305.89	469.586	2.69	1.552	120.963	0.821	2400	1.733	0.577	0.939	300
7	3.288	2271.87	476.676	2.656	1.576	122.171	0.849	2349	1.685	0.593	0.93	360
8	3.296	2281.32	479.744	2.617	1.604	123.863	0.846	2360	1.632	0.613	0.936	420
9	3.229	2287.57	477.602	2.576	1.596	123.962	0.841	2350	1.614	0.62	0.929	480
10	3.246	2326.56	482.559	2.55	1.621	124.405	0.884	2389	1.573	0.636	0.946	540
11	3.271	2302.05	484.331	2.52	1.653	125.118	0.877	2396	1.525	0.656	0.941	600
12	3.263	2323.09	489.467	2.492	1.667	125.671	0.869	2421	1.495	0.669	0.93	660
13	3.246	2319.44	479.654	2.476	1.669	127.216	0.857	2393	1.484	0.674	0.933	720
14	3.296	2310.36	485.09	2.481	1.692	129.001	0.884	2392	1.467	0.682	0.941	780
15	3.372	2305.84	489.938	2.524	1.701	130.664	0.871	2380	1.484	0.674	0.94	840
16	3.389	2315.46	494.544	2.491	1.732	131.067	0.894	2414	1.439	0.695	0.946	900
#13
1	4.684	1419.44	242.675	3.684	1.619	144.056	0.627	1411	2.276	0.439	0.842	0	Thresh = 1018
2	4.684	1446.05	236.411	3.609	1.653	144.461	0.659	1447	2.183	0.458	0.851	60	Area > 2um^2
3	4.675	1449.87	234.42	3.513	1.695	145.444	0.696	1456	2.073	0.482	0.869	120	Tau:	426.4	s
4	4.734	1441.21	230.667	3.455	1.745	145.444	0.713	1456	1.981	0.505	0.88	180	Fusion Length:	1.82845	um
5	4.751	1466.9	233.854	3.401	1.778	145.055	0.724	1505	1.913	0.523	0.888	240	Tau/FusLength:	233.203	s/um
6	4.751	1475.65	239.796	3.358	1.801	144.121	0.767	1517	1.864	0.536	0.908	300
7	4.76	1484.06	246.66	3.307	1.833	144.193	0.791	1516	1.805	0.554	0.916	360
8	4.751	1482.29	243.554	3.281	1.844	145.103	0.8	1519	1.78	0.562	0.919	420
9	4.802	1519.28	264.506	3.239	1.887	145.181	0.794	1543	1.716	0.583	0.93	480
10	4.869	1529.8	279.858	3.206	1.934	146.079	0.82	1557	1.658	0.603	0.929	540
11	4.785	1530.16	272.424	3.16	1.928	145.773	0.83	1558	1.639	0.61	0.934	600
12	4.785	1541.4	273.003	3.139	1.941	145.084	0.834	1577	1.617	0.618	0.937	660
13	4.76	1543.35	276.644	3.109	1.949	146.697	0.791	1573	1.595	0.627	0.932	720
14	4.717	1524.88	269.837	3.089	1.945	145.791	0.823	1542	1.588	0.63	0.93	780
15	4.818	1537.68	272.26	3.118	1.967	145.279	0.836	1572	1.585	0.631	0.932	840
16	4.802	1537.82	272.724	3.054	2.002	145.412	0.864	1572	1.525	0.656	0.949	900

## Sheet: WT1to1000RNA
#1	Area	Mean Int	StDev Int	Major Axis	Minor Axis	Angle	Circ	Median Int	AR	Round	Solidity	Time (s)	Thresh = 1518
1	1.867	2569.53	519.078	2.197	1.082	138.612	0.721	2642	2.031	0.492	0.852	0	Area > 2um^2
2	1.825	2645.99	517.713	2.113	1.1	139.098	0.753	2768	1.922	0.52	0.87	60	Tau:	561.6	s
3	1.833	2675.31	520.782	2.084	1.12	139.195	0.809	2783	1.861	0.537	0.879	120	Fusion Length:	1.09838	um
4	1.85	2649.56	502.882	2.065	1.141	138.499	0.833	2761	1.81	0.552	0.902	180	Tau/FusLength:	511.3	s/um
5	1.858	2640.37	505.949	2.05	1.154	139.233	0.837	2749	1.777	0.563	0.898	240
6	1.875	2633.41	498.634	2.041	1.17	138.548	0.811	2793	1.745	0.573	0.892	300
7	1.875	2659.85	496.058	2.006	1.19	138.953	0.845	2816	1.685	0.593	0.901	360
8	1.875	2691.63	495.598	2.014	1.185	139.335	0.862	2812	1.699	0.589	0.92	420
9	1.875	2699.28	481.396	1.988	1.201	138.095	0.88	2851	1.656	0.604	0.925	480
10	1.884	2704.66	494.716	1.962	1.222	138.833	0.892	2867	1.605	0.623	0.92	540
11	1.9	2755.62	507.701	1.959	1.235	139.241	0.874	2916	1.586	0.63	0.915	600
12	1.892	2760.99	493.881	1.942	1.24	139.358	0.896	2923	1.566	0.639	0.928	660
13	1.884	2783.69	494.591	1.901	1.262	140.167	0.911	2959	1.506	0.664	0.931	720
14	1.917	2817.73	502.251	1.913	1.276	140.022	0.881	3012	1.499	0.667	0.921	780
15	1.934	2820.27	502.585	1.924	1.28	140.286	0.889	3006	1.503	0.665	0.916	840
16	1.884	2879.96	477.641	1.901	1.262	140.677	0.911	3052	1.507	0.664	0.935	900
#2
1	3.086	3316.97	688.715	2.765	1.421	4.386	0.645	3455	1.945	0.514	0.848	0	Thresh = 1920
2	3.069	3397.14	665.451	2.726	1.433	5.716	0.705	3520	1.902	0.526	0.882	60	Area > 2um^2
3	3.17	3403.5	672.93	2.729	1.479	5.66	0.728	3537	1.845	0.542	0.889	120	Tau:	644.4	s
4	3.212	3443.46	654.557	2.744	1.49	7.396	0.702	3634	1.841	0.543	0.88	180	Fusion Length:	1.38196	um
5	3.187	3493.37	615.403	2.744	1.479	7.13	0.736	3677	1.855	0.539	0.891	240	Tau/FusLength:	466.293	s/um
6	3.364	3427.36	646.874	2.763	1.55	6.852	0.75	3653	1.782	0.561	0.894	300
7	3.355	3440.75	632.35	2.758	1.549	6.95	0.749	3655	1.78	0.562	0.897	360
8	3.372	3457.74	614.043	2.752	1.56	6.785	0.752	3675	1.764	0.567	0.899	420
9	3.372	3501.33	578.334	2.743	1.565	6.594	0.757	3701	1.752	0.571	0.912	480
10	3.456	3498.34	594.838	2.757	1.596	7.483	0.776	3705	1.727	0.579	0.917	540
11	3.515	3511.7	592.571	2.768	1.617	7.413	0.789	3684	1.712	0.584	0.924	600
12	3.557	3503.41	592.08	2.763	1.639	6.939	0.798	3657	1.686	0.593	0.927	660
13	3.591	3522.57	590.448	2.767	1.652	8.216	0.801	3689	1.674	0.597	0.915	720
14	3.641	3528.11	578.702	2.787	1.664	7.897	0.806	3694	1.675	0.597	0.927	780
15	3.692	3570.12	564.673	2.804	1.676	8.474	0.796	3751	1.673	0.598	0.914	840
16	3.717	3581.14	549.518	2.806	1.687	8.708	0.806	3730	1.664	0.601	0.921	900
#3
1	5.155	3444.22	583.584	3.631	1.807	25.816	0.618	3619	2.009	0.498	0.847	0	Thresh = 1996
2	5.205	3443.02	565.044	3.597	1.843	25.191	0.664	3625	1.952	0.512	0.869	60	Area > 2um^2
3	5.239	3447.42	569.502	3.576	1.865	25.831	0.694	3639	1.918	0.521	0.88	120	Tau:	409.8	s
4	5.272	3451.36	569.211	3.545	1.894	25.131	0.717	3641	1.872	0.534	0.889	180	Fusion Length:	1.81548	um
5	5.247	3468.1	567.79	3.511	1.903	25.425	0.745	3647	1.845	0.542	0.893	240	Tau/FusLength:	225.725	s/um
6	5.197	3463.02	534.754	3.476	1.903	25.79	0.738	3638	1.826	0.548	0.892	300
7	5.256	3440.32	539.127	3.472	1.927	25.188	0.755	3624	1.801	0.555	0.9	360
8	5.222	3453.4	537.66	3.467	1.918	25.571	0.772	3647	1.808	0.553	0.901	420
9	5.239	3464.3	541.993	3.459	1.928	24.654	0.765	3645	1.794	0.557	0.903	480
10	5.247	3480.76	526.761	3.431	1.947	24.847	0.779	3661	1.762	0.567	0.911	540
11	5.272	3486.27	541.377	3.441	1.951	25.043	0.779	3671	1.764	0.567	0.905	600
12	5.331	3465.03	543.306	3.432	1.978	24.589	0.788	3654	1.735	0.576	0.909	660
13	5.348	3500.18	537.683	3.427	1.987	24.055	0.777	3672	1.724	0.58	0.914	720
14	5.323	3510.55	539.631	3.425	1.979	25.466	0.8	3694	1.731	0.578	0.921	780
15	5.323	3510.54	544.542	3.4	1.993	24.924	0.813	3713	1.706	0.586	0.931	840
16	5.331	3520.8	543.262	3.402	1.996	24.493	0.775	3713	1.705	0.587	0.922	900
#4
1	4.894	3389.91	530.597	3.724	1.673	83.44	0.624	3558	2.226	0.449	0.867	0	Thresh = 1992
2	4.936	3397.23	532.786	3.673	1.711	83.056	0.647	3555	2.147	0.466	0.872	60	Area > 2um^2
3	4.978	3387.33	538.93	3.666	1.729	83.316	0.659	3570	2.12	0.472	0.863	120	Tau:	440.7	s
4	4.995	3385.49	530.487	3.632	1.751	83.511	0.672	3556	2.074	0.482	0.893	180	Fusion Length:	1.85238	um
5	4.97	3453.44	525.385	3.596	1.76	83.358	0.684	3632	2.043	0.489	0.896	240	Tau/FusLength:	237.91	s/um
6	4.995	3466.73	531.752	3.555	1.789	83.294	0.701	3653	1.988	0.503	0.908	300
7	4.978	3453.96	527.628	3.543	1.789	83.221	0.719	3639	1.98	0.505	0.905	360
8	4.919	3442.6	505.419	3.49	1.795	82.991	0.73	3617	1.944	0.514	0.915	420
9	4.97	3442.11	516.529	3.492	1.812	82.917	0.734	3640	1.927	0.519	0.9	480
10	4.978	3442.06	514.987	3.486	1.818	83.491	0.739	3629	1.918	0.521	0.913	540
11	4.961	3429.62	502.581	3.475	1.818	83.682	0.737	3620	1.911	0.523	0.915	600
12	4.928	3443	494.148	3.453	1.817	83.167	0.753	3642	1.9	0.526	0.921	660
13	4.919	3442.43	496.225	3.433	1.824	82.78	0.739	3647	1.882	0.531	0.904	720
14	4.928	3453.79	481.965	3.422	1.833	83.519	0.762	3647	1.867	0.536	0.919	780
15	4.987	3448.53	509.762	3.435	1.848	83.394	0.762	3647	1.858	0.538	0.929	840
16	4.987	3431.15	501.333	3.394	1.87	83.139	0.762	3641	1.815	0.551	0.919	900
#6
1	3.414	2104.06	377.171	2.866	1.517	171.342	0.726	2204	1.889	0.529	0.899	0	Thresh = 1286
2	3.414	2140.13	353.587	2.784	1.562	170.742	0.777	2249	1.782	0.561	0.913	60	Area > 2um^2
3	3.481	2146.24	361.759	2.765	1.603	168.759	0.804	2245	1.724	0.58	0.922	120	Tau:	527.2	s
4	3.465	2154.74	354.268	2.734	1.613	167.828	0.8	2247	1.695	0.59	0.923	180	Fusion Length:	1.43054	um
5	3.515	2164.94	362.762	2.727	1.641	167.497	0.812	2252	1.662	0.602	0.923	240	Tau/FusLength:	368.533	s/um
6	3.532	2161.03	361.469	2.736	1.644	167.48	0.816	2246	1.664	0.601	0.926	300
7	3.523	2169.11	358.048	2.686	1.67	166.556	0.814	2240	1.608	0.622	0.923	360
8	3.565	2160.93	368.106	2.687	1.69	165.391	0.819	2219	1.59	0.629	0.928	420
9	3.607	2147.49	362.541	2.662	1.725	164.383	0.828	2217	1.543	0.648	0.936	480
10	3.607	2150.98	351.284	2.662	1.726	164.037	0.846	2227	1.542	0.648	0.936	540
11	3.616	2148.99	345.592	2.647	1.739	162.844	0.879	2208	1.522	0.657	0.951	600
12	3.658	2134.3	353.367	2.646	1.76	163.97	0.876	2188	1.504	0.665	0.948	660
13	3.641	2109.84	332.442	2.625	1.766	163.56	0.872	2163	1.486	0.673	0.949	720
14	3.607	2138.71	335.471	2.597	1.768	162.388	0.876	2205	1.469	0.681	0.949	780
15	3.641	2122.09	332.432	2.586	1.793	163.264	0.904	2169	1.443	0.693	0.96	840
16	3.658	2128.85	334.732	2.582	1.804	162.181	0.876	2174	1.432	0.698	0.949	900
#7
1	4.549	2164.92	365.447	3.152	1.838	133.716	0.672	2237	1.715	0.583	0.857	0	Thresh = 1340
2	4.524	2166.75	342.603	3.103	1.857	134.819	0.704	2249	1.671	0.598	0.864	60	Area > 2um^2
3	4.608	2184.3	350.971	3.086	1.902	134.777	0.738	2273	1.623	0.616	0.875	120	Tau:	549.6	s
4	4.692	2187.69	353.376	3.082	1.939	135.092	0.739	2294	1.59	0.629	0.883	180	Fusion Length:	1.55407	um
5	4.65	2184.58	343.135	3.051	1.941	135.088	0.758	2300	1.572	0.636	0.888	240	Tau/FusLength:	353.652	s/um
6	4.667	2210.05	337.009	3.048	1.949	135.093	0.757	2314	1.564	0.64	0.894	300
7	4.709	2200.21	340.619	3.057	1.961	135.338	0.755	2310	1.559	0.642	0.9	360
8	4.642	2221.9	328.414	3.011	1.963	135.511	0.799	2333	1.534	0.652	0.899	420
9	4.734	2188.62	331.999	3.018	1.997	135.221	0.781	2294	1.511	0.662	0.907	480
10	4.709	2225.7	323.378	3.02	1.985	135.402	0.797	2334	1.521	0.657	0.91	540
11	4.675	2243.28	325.154	2.973	2.002	135.996	0.815	2346	1.485	0.674	0.923	600
12	4.726	2223.11	333.404	2.98	2.019	135.097	0.804	2341	1.476	0.677	0.922	660
13	4.785	2306.06	345.292	2.98	2.045	134.708	0.814	2423	1.457	0.686	0.919	720
14	4.844	2312.03	342.374	2.994	2.06	133.721	0.824	2427	1.453	0.688	0.925	780
15	4.869	2313.58	346.772	2.987	2.075	134.752	0.828	2423	1.44	0.695	0.923	840
16	4.835	2284.86	336.858	2.973	2.071	135.643	0.837	2391	1.435	0.697	0.927	900
#8
1	3.431	2876.97	631.194	3.245	1.346	79.627	0.62	2883	2.41	0.415	0.843	0	Thresh = 1770
2	3.448	2894.52	637.382	3.229	1.359	79.295	0.655	2920	2.376	0.421	0.861	60	Area > 2um^2
3	3.389	2915.91	635.885	3.178	1.358	80.583	0.644	2926	2.34	0.427	0.857	120	Tau:	761.9	s
4	3.372	2930.69	626.855	3.157	1.36	81.093	0.649	2972	2.322	0.431	0.856	180	Fusion Length:	1.59877	um
5	3.465	2996.18	642.962	3.126	1.411	80.842	0.703	3005	2.216	0.451	0.881	240	Tau/FusLength:	476.555	s/um
6	3.599	3029.98	634.483	3.152	1.454	81.516	0.697	3148	2.168	0.461	0.887	300
7	3.843	3070.45	637.7	3.215	1.522	82.798	0.712	3207	2.113	0.473	0.888	360
8	3.666	3059.51	616.385	3.157	1.479	80.785	0.738	3173	2.135	0.468	0.9	420
9	3.683	3082.93	620.98	3.146	1.491	80.054	0.727	3206	2.111	0.474	0.901	480
10	3.818	3094.96	623.536	3.153	1.542	80.525	0.716	3251	2.045	0.489	0.893	540
11	3.877	3132.29	612.362	3.163	1.56	81.568	0.741	3306	2.027	0.493	0.902	600
12	3.893	3136.95	619.289	3.136	1.581	81.945	0.768	3301	1.984	0.504	0.912	660
13	3.986	3133.72	638.7	3.143	1.615	81.412	0.734	3327	1.946	0.514	0.905	720
14	4.045	3172.27	627.799	3.126	1.647	81.485	0.777	3369	1.897	0.527	0.929	780
15	4.011	3165.36	633.691	3.123	1.635	81.787	0.781	3346	1.91	0.524	0.931	840
16	4.087	3182.53	629.695	3.143	1.656	82.517	0.771	3376	1.898	0.527	0.92	900
#9
1	4.465	3758.53	673.227	3.202	1.776	59.12	0.642	3957	1.803	0.555	0.844	0	Thresh = 2203
2	4.49	3783.94	649.757	3.182	1.797	58.62	0.659	3987	1.771	0.565	0.856	60	Area > 2um^2
3	4.507	3779.72	633.906	3.187	1.801	58.576	0.68	3983	1.77	0.565	0.861	120	Tau:	803.2	s
4	4.516	3817.73	632.823	3.184	1.806	58.413	0.678	4015	1.763	0.567	0.865	180	Fusion Length:	1.59141	um
5	4.541	3833.19	615.151	3.159	1.83	57.548	0.723	4017	1.726	0.579	0.878	240	Tau/FusLength:	504.711	s/um
6	4.558	3838.15	599.881	3.131	1.853	57.215	0.725	4034	1.69	0.592	0.889	300
7	4.516	3857.08	580.514	3.112	1.847	57.499	0.731	4023	1.685	0.593	0.888	360
8	4.608	3851.45	604.666	3.144	1.866	57.226	0.733	4049	1.684	0.594	0.886	420
9	4.675	3837.64	607.192	3.145	1.893	57.714	0.753	4057	1.662	0.602	0.906	480
10	4.709	3879.8	602.198	3.147	1.905	57.122	0.772	4082	1.652	0.605	0.908	540
11	4.726	3865.1	595.44	3.138	1.917	57.082	0.752	4051	1.637	0.611	0.908	600
12	4.667	3915.28	561.493	3.104	1.914	56.887	0.778	4094	1.622	0.617	0.918	660
13	4.684	3900.78	580.766	3.117	1.913	57.018	0.754	4087	1.629	0.614	0.901	720
14	4.717	3887.45	586.606	3.11	1.931	56.884	0.783	4079	1.61	0.621	0.911	780
15	4.701	3904.2	578.853	3.11	1.925	57.075	0.762	4094	1.616	0.619	0.897	840
16	4.768	3873.39	600.377	3.1	1.958	56.275	0.777	4080	1.583	0.632	0.915	900
#10
1	5.239	3107.66	546.291	3.833	1.74	125.918	0.631	3214	2.202	0.454	0.855	0	Thresh = 1939
2	5.23	3129.2	549.682	3.79	1.757	126.377	0.627	3228	2.157	0.464	0.859	60	Area > 2um^2
3	5.23	3148.56	553.509	3.755	1.774	126.421	0.673	3250	2.117	0.472	0.868	120	Tau:	454.8	s
4	5.222	3136.26	553.661	3.721	1.787	126.089	0.68	3205	2.083	0.48	0.873	180	Fusion Length:	1.90836	um
5	5.239	3130.07	549.256	3.725	1.791	126.185	0.705	3210	2.08	0.481	0.88	240	Tau/FusLength:	238.32	s/um
6	5.256	3124.33	555.751	3.683	1.817	126.672	0.707	3181	2.028	0.493	0.883	300
7	5.272	3127.45	541.963	3.701	1.814	126.114	0.721	3188	2.041	0.49	0.889	360
8	5.399	3092.89	540.819	3.709	1.854	126.052	0.707	3196	2.001	0.5	0.881	420
9	5.424	3102.89	530.317	3.714	1.859	125.968	0.714	3221	1.997	0.501	0.888	480
10	5.373	3103.77	512.133	3.684	1.857	126.28	0.723	3231	1.984	0.504	0.895	540
11	5.348	3098.53	523.402	3.693	1.844	126.307	0.724	3215	2.003	0.499	0.897	600
12	5.407	3090.61	539.565	3.695	1.863	126.4	0.732	3199	1.984	0.504	0.894	660
13	5.474	3080.3	535.528	3.692	1.888	126.764	0.741	3203	1.956	0.511	0.899	720
14	5.449	3087.96	520.799	3.667	1.892	126.078	0.741	3191	1.938	0.516	0.899	780
15	5.558	3083.65	520.871	3.701	1.912	126.025	0.753	3217	1.935	0.517	0.907	840
16	5.525	3084.13	513.855	3.676	1.913	126.117	0.76	3187	1.921	0.52	0.908	900
#11
1	2.674	2934.56	558.076	2.586	1.317	54.346	0.68	3084	1.964	0.509	0.846	0	Thresh = 1693
2	2.75	3029.07	586.37	2.608	1.342	54.863	0.732	3173	1.943	0.515	0.854	60	Area > 2um^2
3	2.716	3116.33	588.658	2.594	1.333	54.976	0.712	3291	1.945	0.514	0.844	120	Tau:	544.3	s
4	2.741	3181.37	581.202	2.572	1.357	54.908	0.719	3320	1.895	0.528	0.859	180	Fusion Length:	1.29278	um
5	2.767	3218.01	610.888	2.572	1.37	54.814	0.725	3368	1.877	0.533	0.874	240	Tau/FusLength:	421.032	s/um
6	2.792	3272.09	607.727	2.544	1.397	54.126	0.76	3421	1.821	0.549	0.877	300
7	2.825	3325.12	608.762	2.552	1.41	54.418	0.769	3503	1.81	0.552	0.884	360
8	2.8	3387.85	579.381	2.525	1.412	54.467	0.767	3548	1.789	0.559	0.879	420
9	2.809	3401.94	590.439	2.521	1.419	55.461	0.765	3572	1.777	0.563	0.882	480
10	2.834	3421.93	608.841	2.514	1.435	56.138	0.789	3566	1.752	0.571	0.893	540
11	2.859	3461.33	635.429	2.528	1.44	55.235	0.778	3649	1.755	0.57	0.897	600
12	2.834	3498.3	609.916	2.518	1.433	56.561	0.789	3688	1.757	0.569	0.902	660
13	2.859	3501.96	603.728	2.521	1.444	56.059	0.796	3705	1.746	0.573	0.908	720
14	2.91	3472.22	607.493	2.534	1.462	55.4	0.792	3689	1.733	0.577	0.902	780
15	2.893	3518.36	579.659	2.516	1.464	55.787	0.806	3720	1.719	0.582	0.906	840
16	2.893	3543.17	580.032	2.502	1.472	55.217	0.806	3768	1.699	0.588	0.914	900
