# Supplementary figures and images for: Condensation of LINE-1 is critical for retrotransposition
Source: eLife journal article supplement (doi:10.7554/elife.82991), 2023-04-28

**A**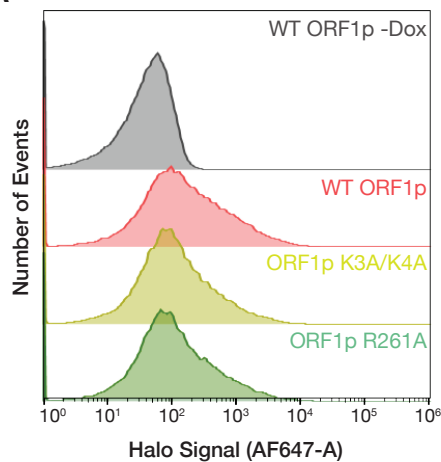**B**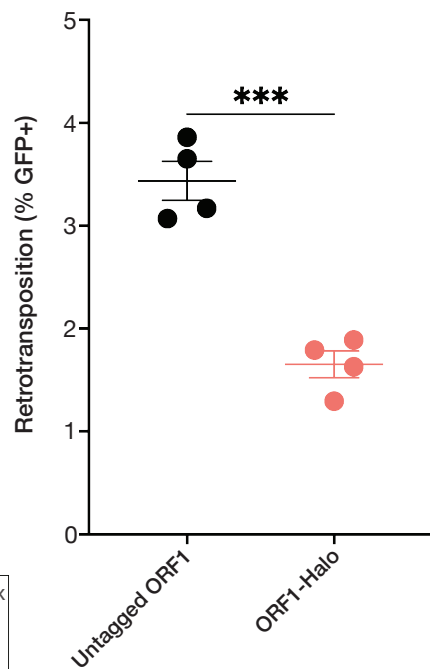**C**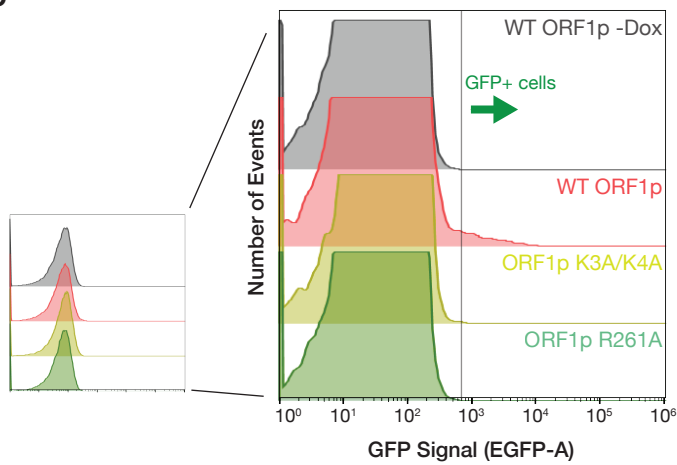

Supplement: supp [file elife-82991-supp-v1.zip]

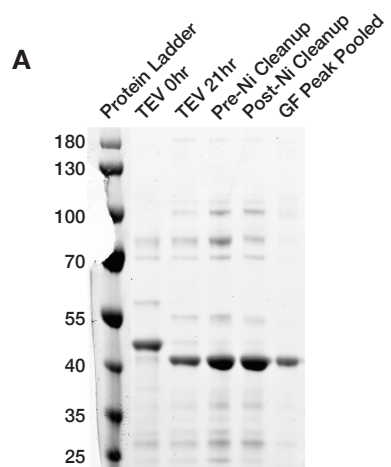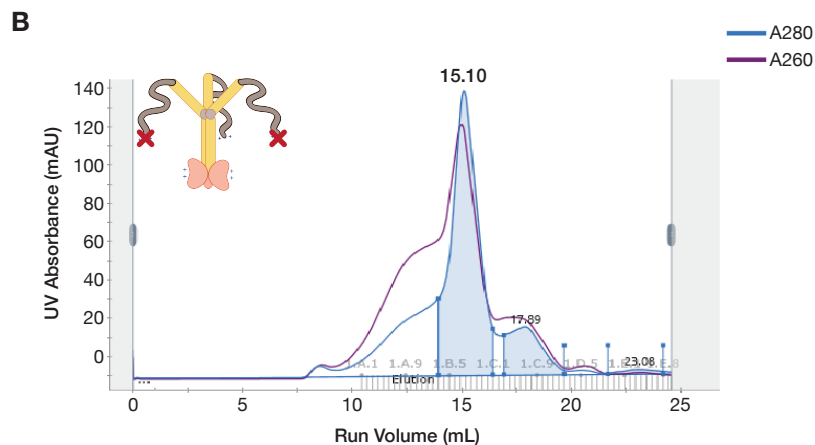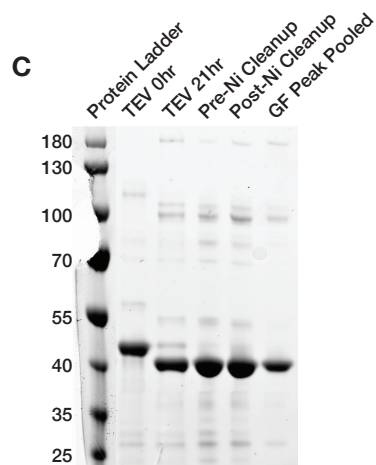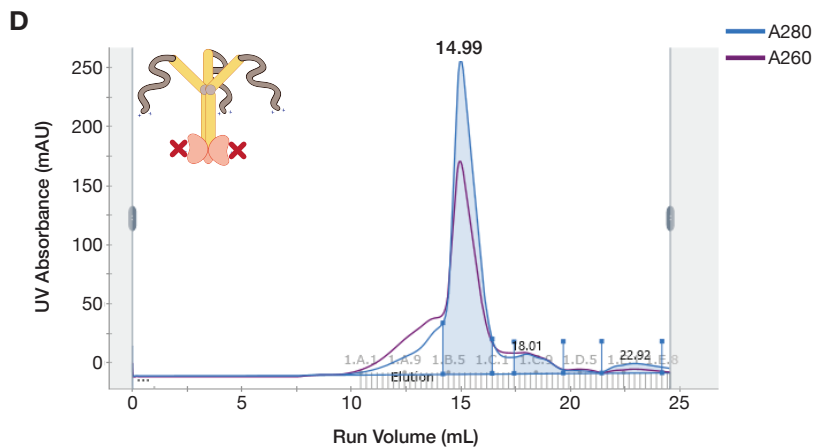

Supplement: supp [file elife-82991-supp-v1.zip]

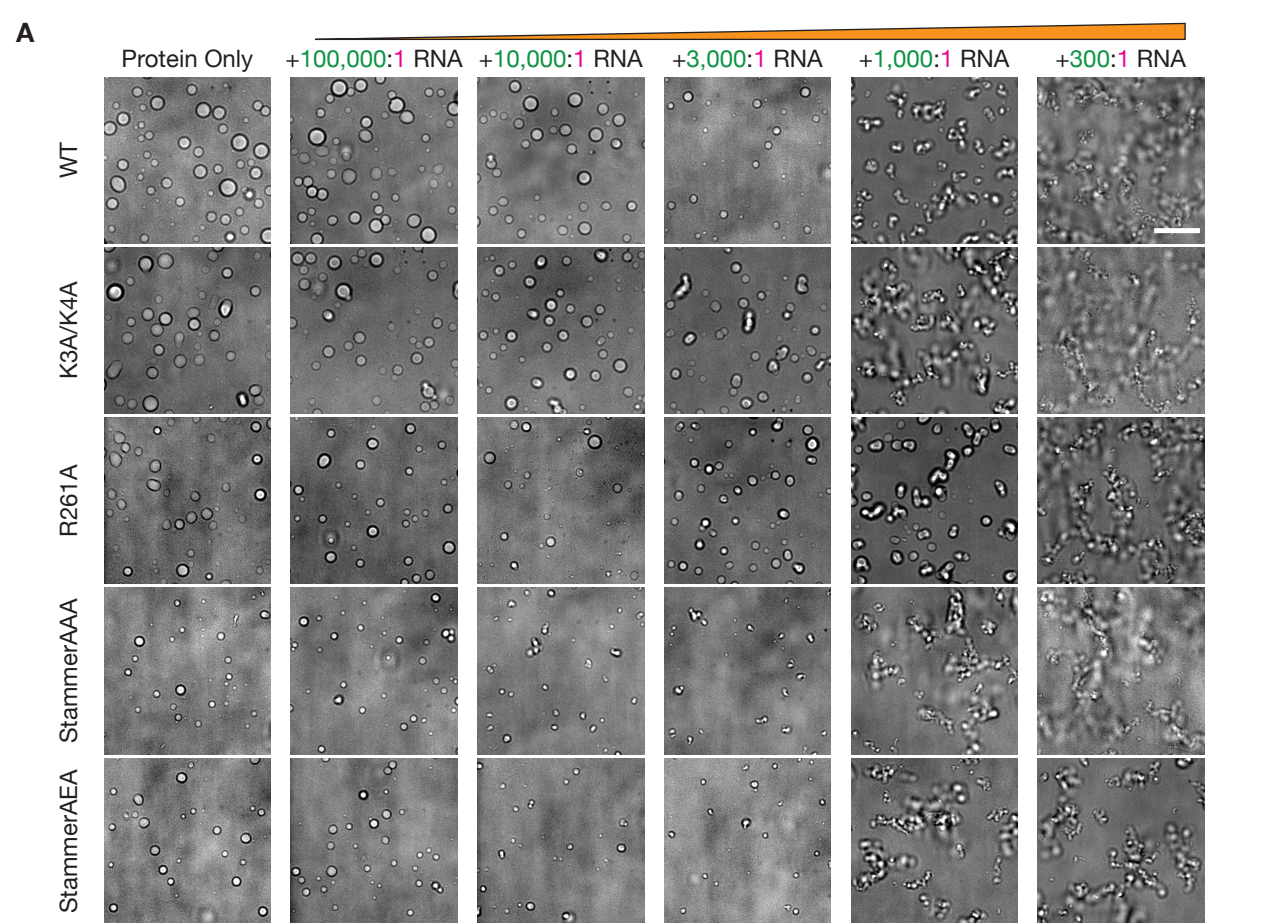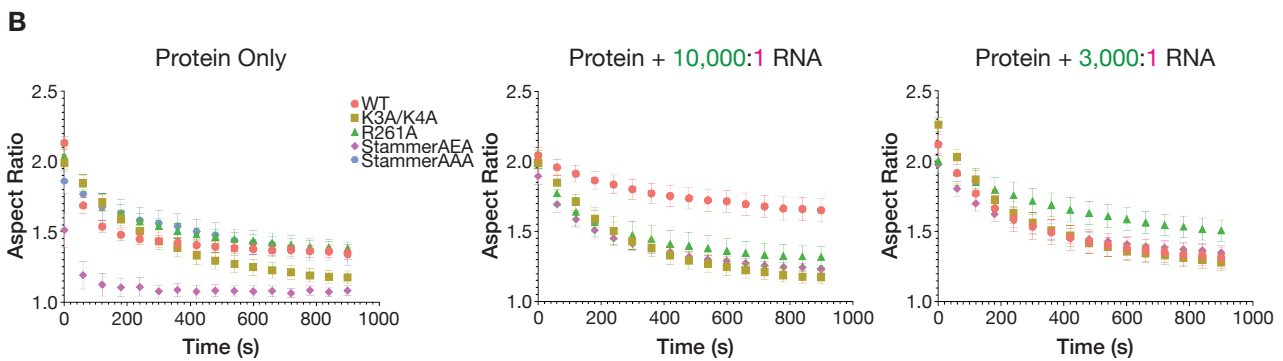

Supplement: supp [file elife-82991-supp-v1.zip]

**A**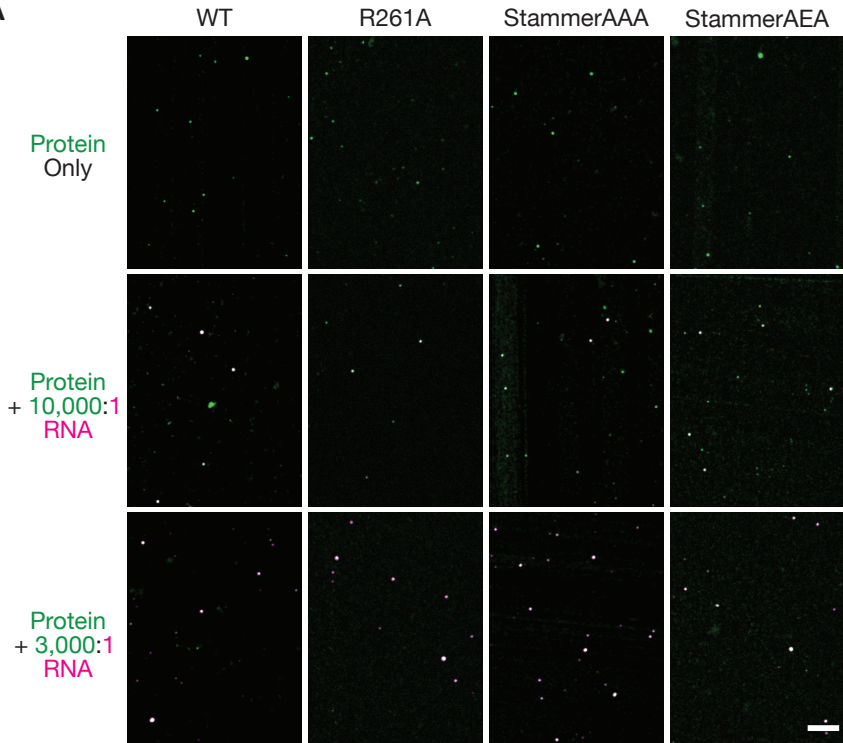**B**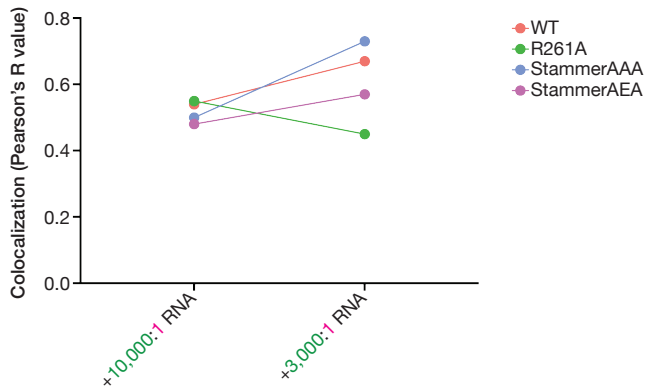

Supplement: supp [file elife-82991-supp-v1.zip]

**A**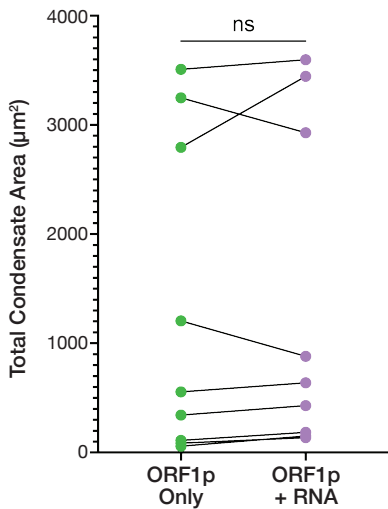**B**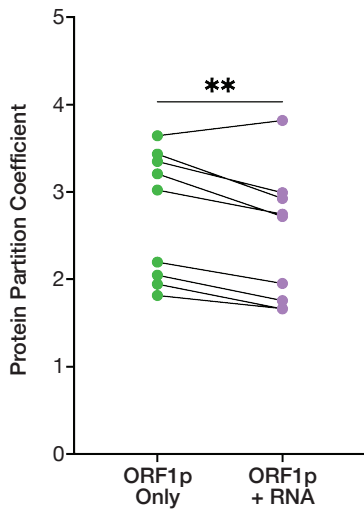**C**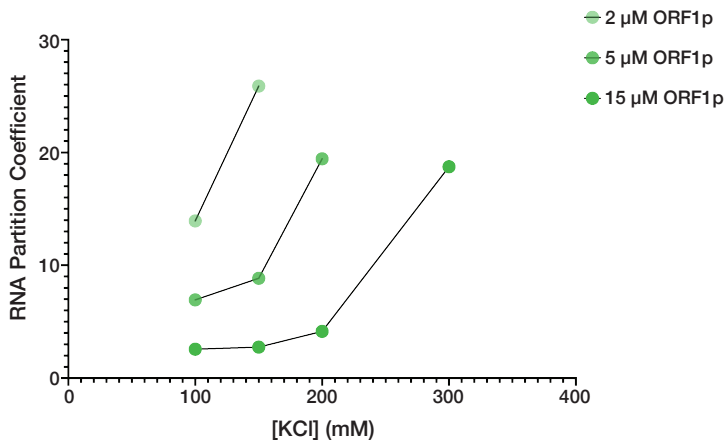

Supplement: supp [file elife-82991-supp-v1.zip]

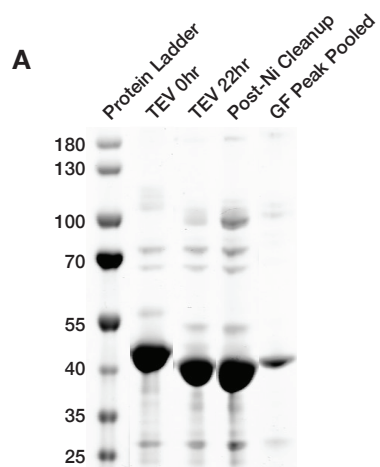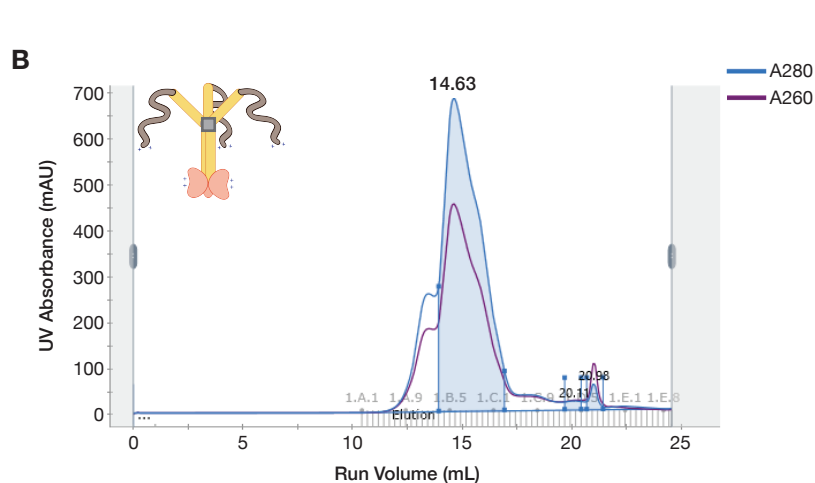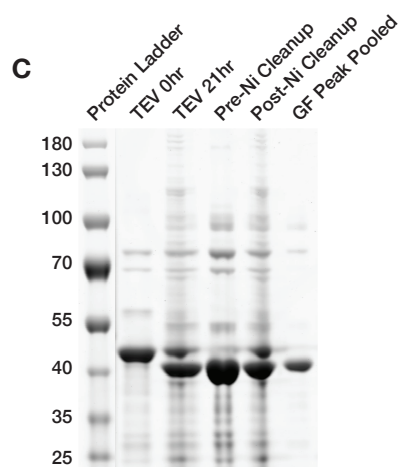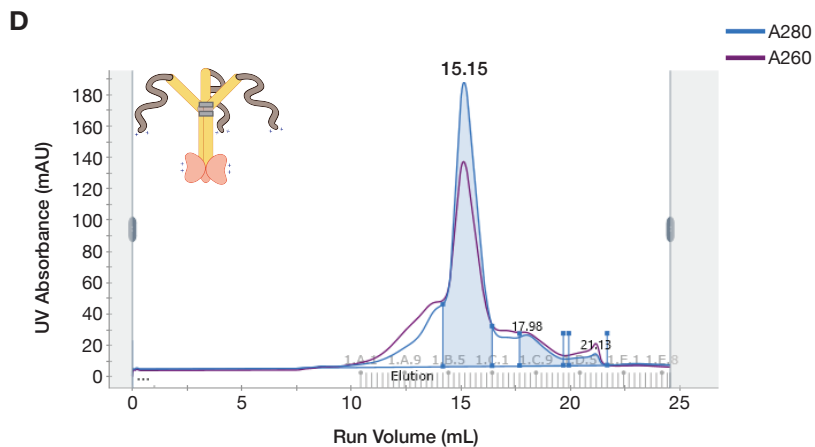

Supplement: supp [file elife-82991-supp-v1.zip]

**A**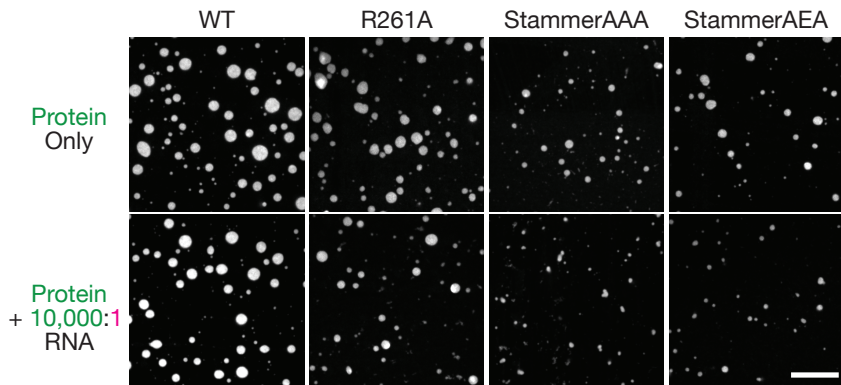**B**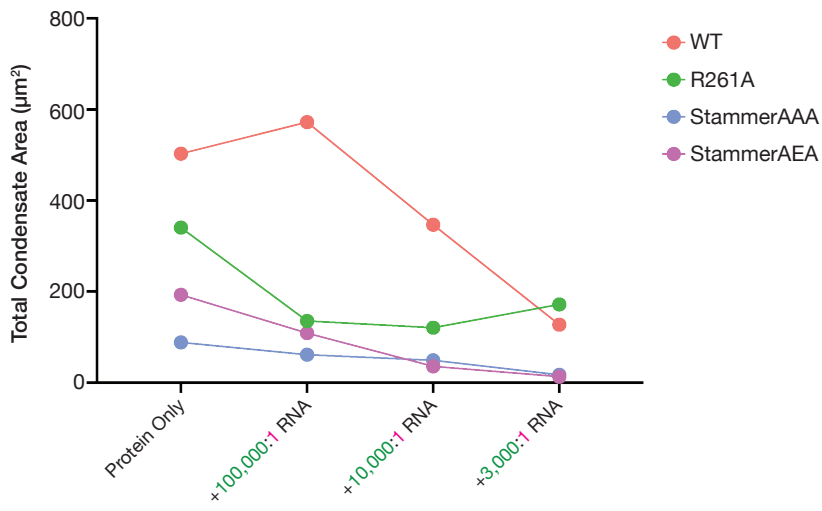

Supplement: supp [file elife-82991-supp-v1.zip]

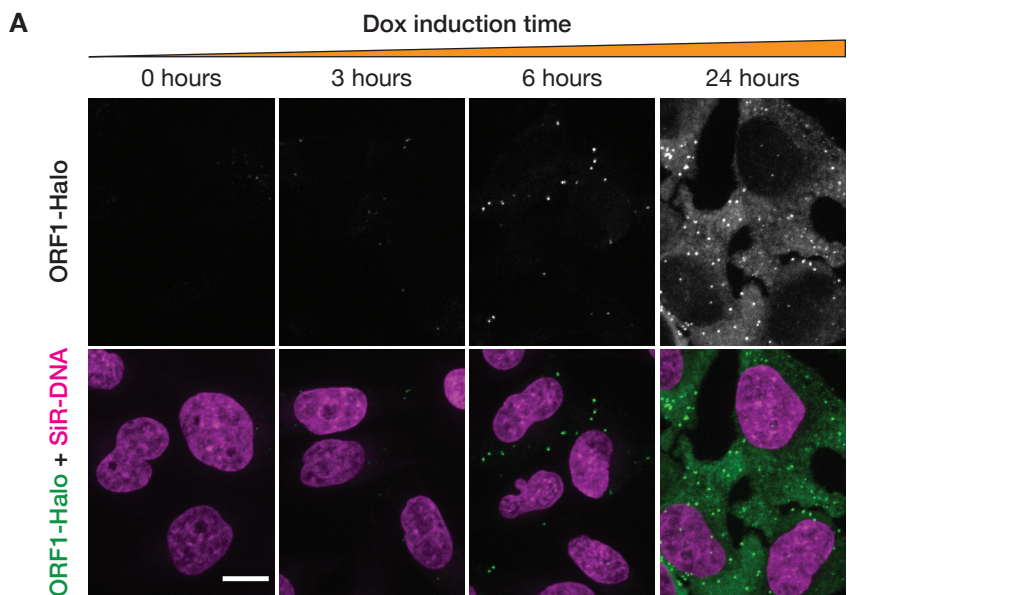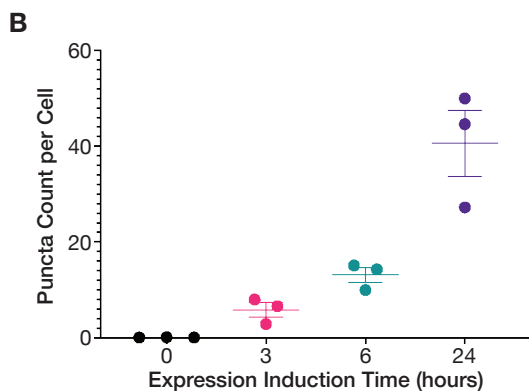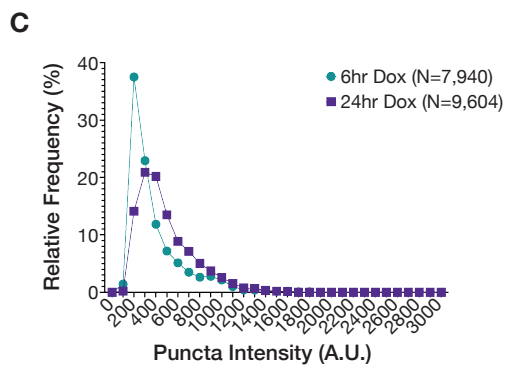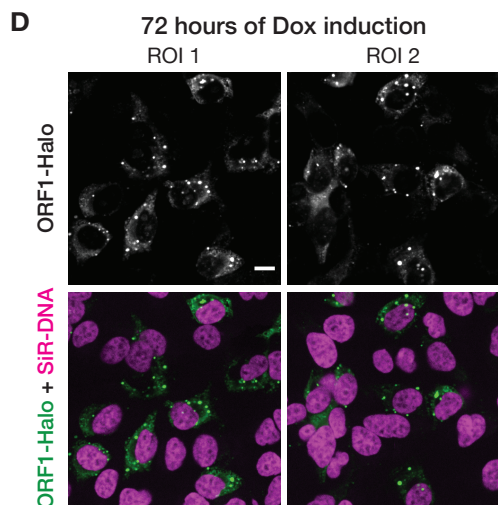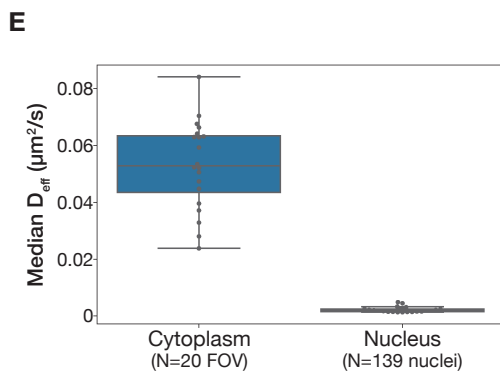

Supplement: supp [file elife-82991-supp-v1.zip › elife_poa_e82991_Figure_1_figure_supplement_1.pdf]

**A**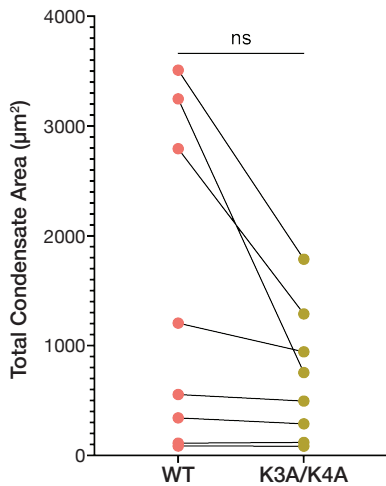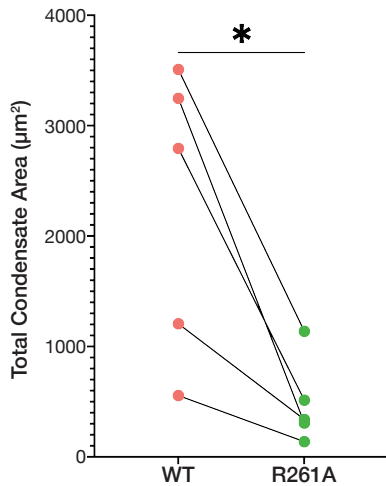**B**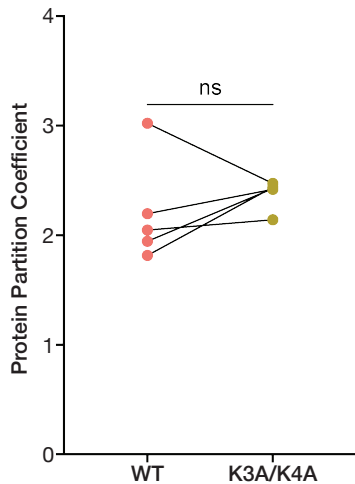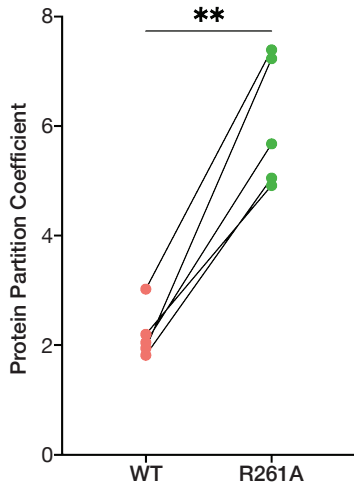

Supplement: supp [file elife-82991-supp-v1.zip › elife_poa_e82991_Figure_3_figure_supplement_2.pdf]

**A**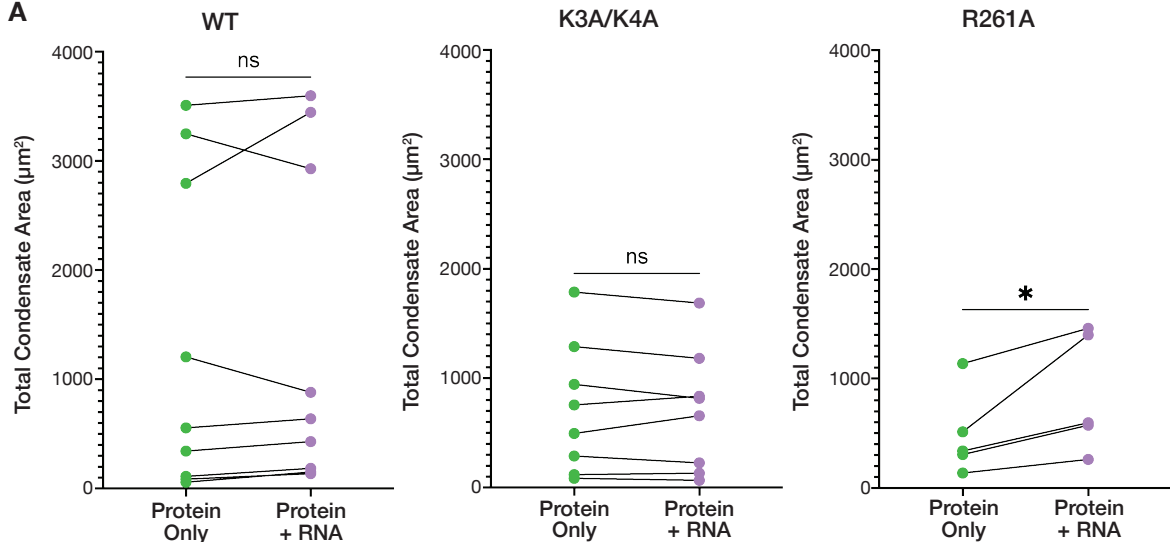**B**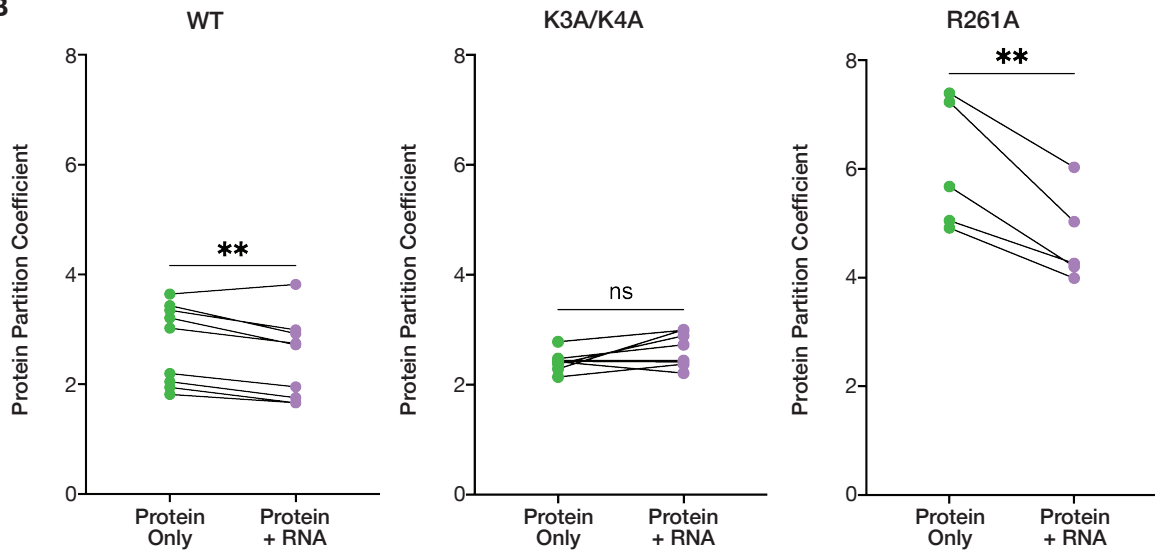

Supplement: supp [file elife-82991-supp-v1.zip › elife_poa_e82991_Figure_3_figure_supplement_3.pdf]

**A**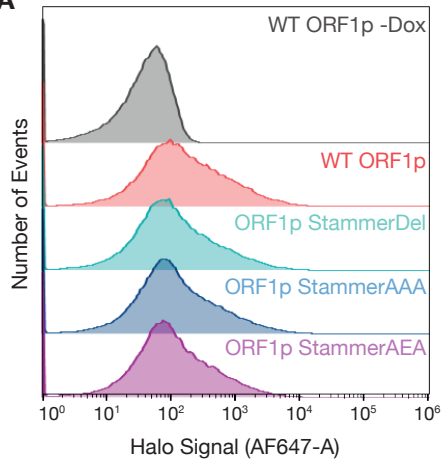**B**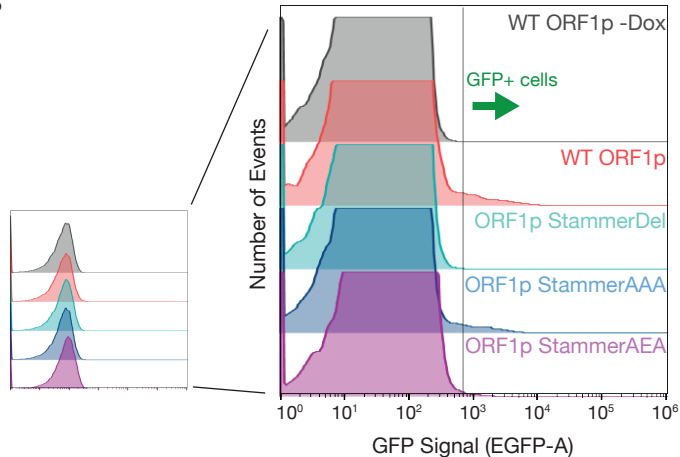

Supplement: supp [file elife-82991-supp-v1.zip › elife_poa_e82991_Figure_4_figure_supplement_1.pdf]
